# Supplementary material
Source: Research Square preprint supplement (doi:10.21203/rs.3.rs-6858132/v1)
Supplement: Supplementary file 1 [file 0eea0ff6dc0e98d02bcbc08b.xlsx]

## Sheet: Sheet 1
DRG_code	original_DRG_weight	year	month	western_drug_ratio	surgery_ratio	check_ratio	tcm_tech_ratio	AVE-tcm	herb_ratio	AVE-herb	tcm_tech_ratio_norm	herb_ratio_norm	western_drug_ratio_norm	surgery_ratio_norm	check_ratio_norm	ESI	AVE-ESI	DRG_weight_adj	sample_size	weighted_tcm_tech_ratio_norm	weighted_herb_ratio_norm	weighted_western_drug_ratio_norm	weighted_surgery_ratio_norm	weighted_check_ratio_norm	weighted_sum	total_sample_size	weighted_avg_norm
IF49	3	2022	2022-03	0.232319	0.322777	0.127552	0.0405851	0.0379185	0.0601429	0.0643597	0.420036	0.41921	0.297473	0.329436	0.362007	0.910782	0.533905	3.8197	21	8.82076	8.80341	6.24693	6.91815	7.60215	1088.59	441	2.46847
LC15	2.13	2022	2022-06	0.196813	0.119479	0.203419	0.0432408	0.0323338	0.0427558	0.0342939	0.642288	0.750589	0.477376	0.674699	0.483336	0.908979	0.72076	2.71084	11	7.06517	8.25648	5.25114	7.42169	5.3167	312.614	121	2.58359
FN19	6.1	2022	2022-11	0.11778	0.341438	0.0730978	0.0265942	0.0196552	0.0498459	0.0327908	0.805255	0.857287	0.546516	0.57794	0.519462	0.905758	0.736295	7.75754	11	8.8578	9.43016	6.01168	6.35734	5.71408	305.838	121	2.52758
IB35	3.25	2021	2021-09	0.179866	0.298301	0.107115	0.103976	0.076364	0.0595979	0.0320491	0.773867	1	0.395026	0.884154	0.647663	0.884065	0.735437	4.11196	10	7.73867	10	3.95026	8.84154	6.47663	301.986	100	3.01986
GV11	0.99	2021	2021-06	0.326442	0.050331	0.396985	0.143063	0.0901187	0.114858	0.0743726	0.918411	0.839502	0.601172	0.746929	0.668168	0.881517	0.7482	1.25181	11	10.1025	9.23453	6.61289	8.21621	7.34985	336.008	121	2.77692
EB19	6.81	2021	2021-11	0.13455	0.35098	0.0962639	0.0281754	0.0284104	0.0158332	0.0134939	0.489642	0.411346	0.292633	0.358844	0.387447	0.877567	0.555324	8.60287	21	10.2825	8.63827	6.14529	7.53572	8.13639	1040.63	441	2.35969
DC19	1.22	2022	2022-09	0.266288	0.0875336	0.282454	0.310529	0.240549	0.181317	0.155263	0.916437	0.735991	0.534831	0.893868	0.619281	0.868913	0.749675	1.53802	11	10.0808	8.0959	5.88314	9.83255	6.8121	332.837	121	2.75072
FM19	4.58	2022	2022-04	0.136665	0.594594	0.118002	0.0410375	0.0274879	0.0673673	0.0679673	0.937337	0.606345	0.507088	0.56575	0.453775	0.867981	0.727429	5.77261	11	10.3107	6.6698	5.57797	6.22325	4.99153	336.768	121	2.78321
FF31	3.15	2022	2022-07	0.190648	0.133575	0.158556	0.0583849	0.0404363	0.0411314	0.0325161	0.597681	0.778269	0.287231	0.686536	0.738589	0.853055	0.73711	3.95614	11	6.57449	8.56096	3.15955	7.55189	8.12447	320.42	121	2.6481
RE13	1	2022	2022-07	0.501456	0.0312346	0.255886	0.0364151	0.0266549	0.41217	0.409508	0.919065	0.532167	0.525532	0.648219	0.707536	0.852297	0.721825	1.25569	11	10.1097	5.85383	5.78085	7.13041	7.78289	334.219	121	2.76214
IB35	3.25	2021	2021-08	0.174605	0.305828	0.102603	0.134359	0.076364	0.0384113	0.0320491	1	0.52829	0.4445	0.859347	0.698422	0.842428	0.735437	4.07137	10	10	5.2829	4.445	8.59347	6.98422	301.986	100	3.01986
FF31	3.15	2022	2022-02	0.204043	0.133711	0.259442	0.0668583	0.0404363	0.0528498	0.0325161	0.713747	1	0.226893	0.686193	0.496005	0.842028	0.73711	3.94572	11	7.85121	11	2.49583	7.54812	5.45606	320.42	121	2.6481
FN2B	1.16	2022	2022-08	0.231307	0.0657637	0.218629	0.153816	0.0378349	0.113118	0.065923	1	0.870024	0.267327	0.839582	0.54162	0.839445	0.703258	1.45213	11	11	9.57026	2.9406	9.23541	5.95782	272.949	121	2.25578
GK19	1.25	2022	2022-08	0.232796	0.16052	0.247255	0.101796	0.0537676	0.062956	0.0379419	0.849034	0.734679	0.472372	0.334169	0.634699	0.839327	0.739868	1.56475	11	9.33938	8.08147	5.19609	3.67586	6.98169	271.369	121	2.24272
FR41	0.75	2021	2021-07	0.247062	0.0897158	0.362877	0.188734	0.133241	0.321557	0.257391	0.560833	0.71528	0.605269	0.787236	0.550934	0.838447	0.691114	0.93865	12	6.72999	8.58336	7.26323	9.44683	6.61121	387.709	144	2.69243
GK19	1.25	2022	2022-07	0.222708	0.14243	0.285369	0.104593	0.0537676	0.044377	0.0379419	0.872975	0.511514	0.533307	0.455433	0.484943	0.83747	0.739868	1.56405	11	9.60273	5.62666	5.86637	5.00976	5.33438	271.369	121	2.24272
GK19	1.25	2022	2022-06	0.228829	0.14478	0.285812	0.119433	0.0537676	0.0500392	0.0379419	1	0.579527	0.496337	0.439681	0.483203	0.833273	0.739868	1.56248	11	11	6.37479	5.4597	4.83649	5.31523	271.369	121	2.24272
EV1A	0.38	2021	2021-11	0.300339	0.0382489	0.429283	0.13418	0.0861792	0.205772	0.175046	0.906525	0.677557	0.419542	0.69726	0.767959	0.831189	0.702932	0.474756	12	10.8783	8.13068	5.03451	8.36713	9.21551	429.749	144	2.98437
NE19	1.16	2022	2022-07	0.281843	0.45637	0.174344	0.0958958	0.0773797	0.0438701	0.0408401	0.956007	0.508404	0.449889	0.706087	0.759716	0.83006	0.742769	1.44886	11	10.5161	5.59245	4.94878	7.76696	8.35688	331.604	121	2.74053
NE19	1.16	2022	2022-06	0.265642	0.43767	0.182166	0.0938891	0.0773797	0.0454703	0.0408401	0.911223	0.539185	0.655111	0.774364	0.679577	0.827454	0.742769	1.44795	11	10.0234	5.93103	7.20622	8.518	7.47535	331.604	121	2.74053
FN19	6.1	2022	2022-06	0.141508	0.36014	0.0681831	0.0215882	0.0196552	0.0562913	0.0327908	0.583536	0.997745	0.291545	0.502413	0.613677	0.826363	0.736295	7.61224	11	6.4189	10.9752	3.20699	5.52654	6.75044	305.838	121	2.52758
IS15	0.37	2022	2022-01	0.199724	0.136278	0.182124	0.448727	0.414086	0.286596	0.251744	0.677668	0.58128	0.539886	0.458617	0.694021	0.825551	0.734902	0.461636	10	6.77668	5.8128	5.39886	4.58617	6.94021	283.434	100	2.83434
DC19	1.22	2022	2022-06	0.286209	0.120308	0.32062	0.252725	0.240549	0.158049	0.155263	0.66204	0.553895	0.260795	0.809876	0.356306	0.8248	0.749675	1.52188	11	7.28244	6.09285	2.86874	8.90864	3.91936	332.837	121	2.75072
BD1B	4.55	2022	2022-05	0.25801	0	0.16735	0.336832	0.204551	0.135051	0.0840451	1	0.947074	0.115333	1	0.769947	0.823397	0.724348	5.67394	9	9	8.52367	1.038	9	6.92953	204.398	81	2.52343
IC39	2.6	2021	2021-09	0.231631	0.404794	0.116144	0.0806621	0.0804234	0.0430161	0.0439479	0.460159	0.411599	0.0736411	0.218268	0.328678	0.822328	0.526481	3.24142	21	9.66335	8.64359	1.54646	4.58363	6.90224	1096.2	441	2.48571
FF31	3.15	2022	2022-05	0.206702	0.100207	0.182744	0.0877563	0.0404363	0.0493388	0.0325161	1	0.933566	0.214916	0.770515	0.680426	0.821954	0.73711	3.92675	11	11	10.2692	2.36408	8.47567	7.48469	320.42	121	2.6481
LC1A	2.6	2022	2022-07	0.212386	0.149391	0.102218	0.0226469	0.0207284	0.0300723	0.0272528	0.730438	0.725624	0.301673	0.326932	0.726267	0.821011	0.736173	3.24039	11	8.03481	7.98187	3.31841	3.59625	7.98894	330.682	121	2.73291
RE15	0.8	2022	2022-05	0.522261	0	0.251264	0.0203162	0.0164811	0.582366	0.423205	0.65636	0.773647	0.314065	1	0.607162	0.819412	0.714261	0.996659	11	7.21996	8.51012	3.45471	11	6.67878	313.253	121	2.58887
FF31	3.15	2022	2022-08	0.157439	0.274322	0.156181	0.0634265	0.0404363	0.0448237	0.0325161	0.66674	0.848134	0.436822	0.332304	0.7443	0.819299	0.73711	3.92424	11	7.33413	9.32947	4.80504	3.65534	8.1873	320.42	121	2.6481
NE19	1.16	2022	2022-02	0.288623	0.412532	0.175915	0.097867	0.0773797	0.0649402	0.0408401	1	0.913694	0.364001	0.866149	0.743627	0.819256	0.742769	1.4451	11	11	10.0506	4.00402	9.52764	8.17989	331.604	121	2.74053
DU15	0.37	2022	2022-05	0.103483	0.0102462	0.136262	0.609042	0.560993	0.152051	0.130476	0.64879	0.83497	0.164264	0.600797	0.836648	0.813933	0.747299	0.460347	10	6.4879	8.3497	1.64264	6.00797	8.36648	319.677	100	3.19677
FT39	0.69	2022	2022-08	0.256621	0.00687484	0.426515	0.247982	0.150289	0.163971	0.217892	1	0.455581	0.637451	0.741057	0.748466	0.81339	0.728031	0.858372	10	10	4.55581	6.37451	7.41057	7.48466	295.51	100	2.9551
LD19	1.92	2021	2021-12	0.356673	0.348927	0.226	0.0271511	0.0314576	0.0611849	0.0520886	0.298337	0.335599	0.0653679	0.307061	0.359418	0.812914	0.628429	2.38824	21	6.26509	7.04757	1.37272	6.44828	7.54779	854.077	441	1.93668
FN2B	1.16	2022	2022-07	0.218416	0.122194	0.203655	0.0636267	0.0378349	0.104387	0.065923	0.398567	0.79546	0.418583	0.58473	0.692717	0.812393	0.703258	1.44271	11	4.38424	8.75006	4.60441	6.43203	7.61989	272.949	121	2.25578
LD19	1.92	2022	2022-06	0.306347	0.314202	0.230467	0.0315934	0.0314576	0.0597004	0.0520886	0.420541	0.323503	0.410804	0.413923	0.334831	0.811479	0.628429	2.38741	21	8.83136	6.79356	8.62689	8.69239	7.03145	854.077	441	1.93668
HS13	1.25	2021	2021-10	0.434122	0.0281048	0.320175	0.101282	0.0796169	0.20851	0.213053	0.711753	0.399816	0.428418	0.479307	0.377339	0.810672	0.715027	1.554	11	7.82928	4.39797	4.7126	5.27238	4.15073	307.367	121	2.54023
GV11	0.99	2021	2021-05	0.343246	0.114874	0.325334	0.153912	0.0901187	0.103637	0.0743726	1	0.757488	0.562846	0.422394	0.810049	0.810468	0.7482	1.23071	11	11	8.33236	6.1913	4.64634	8.91054	336.008	121	2.77692
GK21	1.35	2022	2022-06	0.318505	0.166653	0.280382	0.139983	0.123622	0.0637343	0.0734933	0.719943	0.48111	0.469694	0.883792	0.373085	0.809544	0.743348	1.67787	10	7.19943	4.8111	4.69694	8.83792	3.73085	249.95	100	2.4995
HJ19	3.04	2022	2022-07	0.413395	0.0587375	0.285096	0.0372592	0.0274378	0.223232	0.198692	0.836302	0.670575	0.377873	0.939827	0.240214	0.807696	0.717283	3.77662	11	9.19932	7.37632	4.1566	10.3381	2.64235	315.083	121	2.60399
DC19	1.22	2022	2022-10	0.256973	0.102016	0.29009	0.329516	0.240549	0.157564	0.155263	1	0.550099	0.662967	0.856755	0.566665	0.806091	0.749675	1.51503	11	11	6.05109	7.29264	9.4243	6.23331	332.837	121	2.75072
DU15	0.37	2022	2022-08	0.0828046	0	0.087302	0.770357	0.560993	0.126578	0.130476	0.971954	0.695089	0.411052	1	0.921913	0.805507	0.747299	0.459411	10	9.71954	6.95089	4.11052	10	9.21913	319.677	100	3.19677
EB19	6.81	2021	2021-08	0.155394	0.350422	0.104796	0.0254823	0.0284104	0.0105357	0.0134939	0.423967	0.273718	0.046773	0.362815	0.191243	0.80548	0.555324	8.4556	21	8.90331	5.74808	0.982233	7.61911	4.01611	1040.63	441	2.35969
IS15	0.37	2022	2022-07	0.151441	0.0123965	0.242496	0.522417	0.414086	0.288404	0.251744	0.83685	0.590083	0.780276	0.950753	0.464726	0.805428	0.734902	0.459403	10	8.3685	5.90083	7.80276	9.50753	4.64726	283.434	100	2.83434
GK21	1.35	2022	2022-04	0.330473	0.18638	0.30726	0.136596	0.123622	0.0975602	0.0734933	0.666941	1	0.351113	0.546463	0.206553	0.804237	0.743348	1.67572	10	6.66941	10	3.51113	5.46463	2.06553	249.95	100	2.4995
JB25	0.95	2022	2022-01	0.079958	0.391621	0.278503	0.067904	0.0627989	0.188184	0.116619	0.45596	0.666243	0.454192	0.547189	0.252928	0.803645	0.701777	1.17904	11	5.01556	7.32867	4.99612	6.01908	2.78221	251.888	121	2.08172
EB19	6.81	2021	2021-12	0.129346	0.338083	0.105364	0.0216189	0.0284104	0.0184976	0.0134939	0.329755	0.480569	0.354017	0.450654	0.178169	0.803286	0.555324	8.45111	21	6.92486	10.0919	7.43435	9.46373	3.74154	1040.63	441	2.35969
IG13	1.2	2022	2022-08	0.202849	0.306446	0.189334	0.348715	0.252028	0.150024	0.0668449	0.561848	1	0.665815	0.50596	0.6905	0.801402	0.697405	1.4885	11	6.18033	11	7.32396	5.56556	7.5955	303.308	121	2.50668
FR4B	0.38	2021	2021-05	0.22704	0.108881	0.374327	0.133877	0.0996804	0.385709	0.305796	0.612837	1	0.59877	0.730647	0.538724	0.801377	0.712815	0.471357	12	7.35405	12	7.18524	8.76776	6.46469	362.648	144	2.51839
RE11	1.12	2022	2022-08	0.511558	0.00323747	0.245603	0.0523924	0.0426106	0.493237	0.461528	0.475664	0.739188	0.463066	0.949944	0.445676	0.801269	0.721784	1.38923	11	5.23231	8.13107	5.09372	10.4494	4.90243	319.765	121	2.64268
NR1B	0.6	2021	2021-07	0.343969	0.149151	0.323661	0.115978	0.0515262	0.244256	0.374652	0.837381	0.314793	0.51028	0.53515	0.541411	0.801049	0.694285	0.744189	12	10.0486	3.77751	6.12336	6.4218	6.49693	383.42	144	2.66264
DC19	1.22	2022	2022-11	0.277886	0.0823745	0.292265	0.319427	0.240549	0.142961	0.155263	0.955598	0.435812	0.375285	0.907089	0.551681	0.800734	0.749675	1.51307	11	10.5116	4.79393	4.12814	9.97798	6.06849	332.837	121	2.75072
DU15	0.37	2022	2022-02	0.0945266	0	0.180037	0.565018	0.560993	0.139107	0.130476	0.560598	0.763892	0.271158	1	0.760414	0.798566	0.747299	0.458641	10	5.60598	7.63892	2.71158	10	7.60414	319.677	100	3.19677
FF2A	2.77	2022	2022-06	0.199941	0.375167	0.240152	0.080397	0.0645231	0.11159	0.0759176	0.77301	0.646661	0.14296	0.635768	0.393892	0.798382	0.731777	3.43346	9	6.95709	5.81995	1.28664	5.72191	3.54503	191.312	81	2.36188
GV11	0.99	2021	2021-03	0.291695	0.127798	0.413695	0.104557	0.0901187	0.132438	0.0743726	0.628838	0.967997	0.680421	0.357411	0.635079	0.797843	0.7482	1.22696	11	6.91722	10.648	7.48463	3.93153	6.98587	336.008	121	2.77692
GW1A	0.5	2021	2021-09	0.301388	0.174317	0.476964	0.0893248	0.103302	0.107381	0.112428	0.271233	0.389239	0.345219	0.365317	0.367159	0.796897	0.595493	0.619535	23	6.23836	8.95249	7.94004	8.40229	8.44466	1112.54	529	2.10311
HJ19	3.04	2022	2022-04	0.428413	0.0833083	0.283499	0.0391234	0.0274378	0.193077	0.198692	0.911186	0.451081	0.258987	0.764456	0.257157	0.796412	0.717283	3.76633	11	10.023	4.96189	2.84886	8.40902	2.82873	315.083	121	2.60399
LC1A	2.6	2022	2022-05	0.235545	0.139647	0.103197	0.0237251	0.0207284	0.032314	0.0272528	0.812671	0.856912	0	0.510657	0.710616	0.795357	0.736173	3.22038	11	8.93938	9.42603	0	5.61723	7.81678	330.682	121	2.73291
FF2A	2.77	2022	2022-05	0.193399	0.440727	0.257762	0.0996264	0.0645231	0.16538	0.0759176	1	1	0.195336	0.509289	0.219276	0.79509	0.731777	3.43072	9	9	9	1.75803	4.5836	1.97349	191.312	81	2.36188
FM19	4.58	2022	2022-03	0.130507	0.613892	0.114138	0.0430203	0.0274879	0.0512392	0.0679673	1	0.414687	0.641512	0.484259	0.51358	0.794451	0.727429	5.67158	11	11	4.56156	7.05663	5.32685	5.64938	336.768	121	2.78321
GK39	0.92	2022	2022-06	0.264074	0.204766	0.306624	0.086689	0.0873316	0.0614946	0.0642698	0.517587	0.395475	0.540532	0.481598	0.44472	0.790692	0.716715	1.13823	11	5.69345	4.35022	5.94585	5.29758	4.89192	302.689	121	2.50157
FR4B	0.38	2021	2021-04	0.194111	0.131407	0.410156	0.154171	0.0996804	0.32041	0.305796	0.78175	0.72275	0.809868	0.590616	0.357913	0.790212	0.712815	0.470084	12	9.38099	8.673	9.71842	7.08739	4.29496	362.648	144	2.51839
GK2B	0.89	2022	2022-04	0.335399	0.203923	0.297771	0.137013	0.124827	0.0833131	0.0880246	0.877738	0.464456	0.213711	0.677104	0.852036	0.789808	0.735022	1.10088	11	9.65512	5.10902	2.35082	7.44815	9.3724	323.041	121	2.66976
RE13	1	2022	2022-11	0.522131	0.0287582	0.237351	0.0333042	0.0266549	0.442634	0.409508	0.784333	0.651257	0.387394	0.67611	1	0.78972	0.721825	1.23692	11	8.62766	7.16383	4.26133	7.43721	11	334.219	121	2.76214
GK21	1.35	2022	2022-11	0.303078	0.191977	0.29709	0.126315	0.123622	0.0903061	0.0734933	0.506057	0.888722	0.622549	0.450747	0.269564	0.788925	0.743348	1.66951	10	5.06057	8.88722	6.22549	4.50747	2.69564	249.95	100	2.4995
GK19	1.25	2022	2022-09	0.269232	0.173544	0.265662	0.0737896	0.0537676	0.0850447	0.0379419	0.609297	1	0.252287	0.246857	0.562373	0.788892	0.739868	1.54583	11	6.70226	11	2.77516	2.71543	6.1861	271.369	121	2.24272
GD19	1.7	2022	2022-11	0.302691	0.350342	0.0859861	0.0616651	0.0538944	0.0169575	0.00651137	0.767262	1	0.376014	0.436116	0.920636	0.78826	0.71975	2.10201	11	8.43988	11	4.13615	4.79728	10.127	328.788	121	2.71726
GK2B	0.89	2022	2022-02	0.34633	0.209525	0.292728	0.13332	0.124827	0.0940408	0.0880246	0.796567	0.776161	0.0939867	0.613327	0.911147	0.787751	0.735022	1.10033	11	8.76224	8.53777	1.03385	6.7466	10.0226	323.041	121	2.66976
LC1A	2.6	2022	2022-06	0.233514	0.136212	0.0996091	0.0226067	0.0207284	0.0342388	0.0272528	0.727373	0.969641	0.0264622	0.575435	0.767959	0.786936	0.736173	3.21381	11	8.0011	10.666	0.291084	6.32978	8.44754	330.682	121	2.73291
GU25	0.48	2022	2022-02	0.385765	0.231279	0.293554	0.170111	0.125924	0.102639	0.089466	0.60272	0.585779	0.346649	0.405567	0.904101	0.786062	0.707923	0.593193	11	6.62992	6.44357	3.81314	4.46124	9.94512	270.535	121	2.23583
GR15	0.54	2021	2021-05	0.30902	0.114868	0.315059	0.0497556	0.0524066	0.512744	0.497872	0.528259	0.529927	0.694816	0.366342	0.590506	0.785928	0.710284	0.66732	12	6.33911	6.35912	8.33779	4.39611	7.08607	376.036	144	2.61136
GK21	1.35	2022	2022-07	0.301483	0.186124	0.298352	0.124802	0.123622	0.0765795	0.0734933	0.482363	0.678156	0.638354	0.550832	0.261744	0.785908	0.743348	1.66829	10	4.82363	6.78156	6.38354	5.50832	2.61744	249.95	100	2.4995
GD19	1.7	2022	2022-10	0.290368	0.346873	0.0790785	0.0615668	0.0538944	0.00967512	0.00651137	0.765497	0.57055	0.4684	0.513327	0.976402	0.78576	0.71975	2.10074	11	8.42047	6.27605	5.1524	5.6466	10.7404	328.788	121	2.71726
FN19	6.1	2022	2022-07	0.159688	0.269735	0.0727497	0.0309912	0.0196552	0.0345664	0.0327908	1	0.524321	0.0961836	0.86751	0.526135	0.78564	0.736295	7.53772	11	11	5.76753	1.05802	9.54261	5.78748	305.838	121	2.52758
LZ1B	0.3	2021	2021-10	0.286818	0.174604	0.304796	0.161305	0.101848	0.14057	0.116296	0.570152	0.555547	0.663631	0.33705	0.686743	0.784884	0.680504	0.37064	12	6.84182	6.66657	7.96357	4.0446	8.24091	362.611	144	2.51813
DU15	0.37	2022	2022-06	0.113662	0.0096788	0.08541	0.784357	0.560993	0.171458	0.130476	1	0.941539	0.0427888	0.622904	0.925208	0.784407	0.747299	0.457069	10	10	9.41539	0.427888	6.22904	9.25208	319.677	100	3.19677
FM19	4.58	2022	2022-05	0.14019	0.698841	0.104854	0.0326945	0.0274879	0.0778525	0.0679673	0.673659	0.730946	0.430131	0.125544	0.657275	0.784117	0.727429	5.65738	11	7.41025	8.04041	4.73144	1.38099	7.23003	336.768	121	2.78321
RE11	1.12	2022	2022-01	0.471716	0.00198593	0.23633	0.0909435	0.0426106	0.541819	0.461528	1	0.909444	0.670046	0.969294	0.522623	0.783957	0.721784	1.38341	11	11	10.0039	7.37051	10.6622	5.74886	319.765	121	2.64268
GU23	0.6	2021	2021-07	0.345924	0.0986294	0.355774	0.201106	0.11158	0.163914	0.105488	1	0.85333	0.422729	0.670781	0.808077	0.781913	0.703572	0.740744	12	12	10.24	5.07274	8.04937	9.69692	347.226	144	2.41129
FT39	0.69	2022	2022-06	0.278839	0.0180364	0.450039	0.167159	0.150289	0.188208	0.217892	0.553428	0.522923	0.539139	0.320655	0.684208	0.781327	0.728031	0.851735	10	5.53428	5.22923	5.39139	3.20655	6.84208	295.51	100	2.9551
NE19	1.16	2022	2022-11	0.294284	0.542576	0.1673	0.0743584	0.0773797	0.0490919	0.0408401	0.475344	0.608847	0.29229	0.391335	0.831883	0.780867	0.742769	1.43174	11	5.22879	6.69732	3.21519	4.30469	9.15072	331.604	121	2.74053
KT11	0.67	2021	2021-09	0.280179	0.088545	0.401861	0.120651	0.109662	0.314316	0.293975	0.672198	0.559885	0.793619	0.418956	0.604522	0.779912	0.684715	0.826762	12	8.06638	6.71862	9.52343	5.02748	7.25427	424.379	144	2.94707
KD19	2.42	2021	2021-03	0.214753	0.546126	0.238077	0.0276895	0.0503618	0.0156039	0.0174265	0.206128	0.294584	0.336788	0.408041	0.283859	0.779781	0.572877	2.98612	21	4.32868	6.18626	7.07254	8.56887	5.96103	1034.8	441	2.34649
BY31	1.3	2022	2022-02	0.0728473	0	0.0626869	0.821641	0.841067	0.290559	0.115014	0.587528	1	0.425985	1	0.676762	0.779254	0.685226	1.60391	11	6.46281	11	4.68584	11	7.44438	361.246	121	2.98551
RE15	0.8	2022	2022-04	0.54054	0	0.256544	0.0176302	0.0164811	0.497581	0.423205	0.545517	0.55425	0.251622	1	0.581937	0.778742	0.714261	0.986898	11	6.00068	6.09674	2.76784	11	6.40131	313.253	121	2.58887
BT23	0.88	2022	2022-03	0.35107	0.00423685	0.177761	0.364934	0.314416	0.138202	0.121433	0.450301	0.514566	0.503221	0.812814	0.754565	0.778353	0.673455	1.08549	11	4.95331	5.66023	5.53543	8.94095	8.30021	345.886	121	2.85856
BR15	0.84	2021	2021-12	0.33411	0	0.193894	0.414182	0.476389	0.106672	0.0802557	0.562676	0.601282	0.636673	#NUM!	0.583792	0.777788	0.58507	1.036	12	6.75211	7.21539	7.64007	#NUM!	7.0055	358.048	144	2.48644
CZ1A	0.15	2021	2021-12	0.348811	0.039091	0.21699	0.311181	0.33091	0.330567	0.301052	0.367398	0.590416	0.116388	0.634634	0.685643	0.774903	0.686816	0.184871	12	4.40878	7.08499	1.39665	7.61561	8.22771	367.124	144	2.54947
GK39	0.92	2022	2022-04	0.296041	0.184483	0.288141	0.101945	0.0873316	0.0691424	0.0642698	1	0.646696	0.127945	0.900615	0.7912	0.774572	0.716715	1.13378	11	11	7.11366	1.4074	9.90676	8.7032	302.689	121	2.50157
EB19	6.81	2021	2021-09	0.148083	0.330474	0.0998449	0.0318829	0.0284104	0.0111828	0.0134939	0.580053	0.290529	0.133013	0.504815	0.305094	0.774553	0.555324	8.39241	21	12.1811	6.1011	2.79326	10.6011	6.40697	1040.63	441	2.35969
FM29	3.92	2022	2022-04	0.141302	0.338682	0.119282	0.032879	0.0249894	0.105492	0.08127	0.840921	0.847618	0.535118	1	0.171548	0.774163	0.713209	4.83042	11	9.25014	9.32379	5.8863	11	1.88703	315.309	121	2.60586
RE15	0.8	2022	2022-07	0.536311	0.077768	0.203788	0.024666	0.0164811	0.414345	0.423205	0.835862	0.338861	0.266069	0.494118	0.83401	0.772617	0.714261	0.985428	11	9.19448	3.72747	2.92676	5.4353	9.1741	313.253	121	2.58887
LC15	2.13	2022	2022-07	0.19912	0.119118	0.320209	0.039626	0.0323338	0.0446781	0.0342939	0.568369	0.808086	0.45391	0.678615	0	0.77213	0.72076	2.62339	11	6.25206	8.88894	4.99301	7.46476	0	312.614	121	2.58359
NC1B	2.32	2022	2022-07	0.227251	0.469614	0.196755	0.109163	0.0730232	0.0884296	0.0524605	1	1	0.849846	0.639774	0.437823	0.771953	0.701672	2.85728	11	11	11	9.34831	7.03751	4.81605	250.726	121	2.07211
HS31	0.7	2021	2021-08	0.350494	0.0426598	0.369448	0.0874415	0.0573934	0.314657	0.280564	0.870832	0.520347	0.745773	0.286291	0.443426	0.771952	0.698924	0.86211	12	10.45	6.24416	8.94928	3.43549	5.32111	339.832	144	2.35994
ER3A	2	2022	2022-09	0.391132	0.00100931	0.242849	0.0829465	0.0811518	0.241223	0.200114	0.432991	0.640202	0.62314	0.956119	0.415646	0.771247	0.716639	2.46275	9	3.89692	5.76181	5.60826	8.60507	3.74082	212.158	81	2.61923
TT19	0.63	2022	2022-11	0.196094	0.0325415	0.355656	0.225586	0.315997	0.266474	0.307573	0.222415	0.286272	0	0.234493	0.320632	0.7706	0.47371	0.775643	23	5.11554	6.58426	0	5.39334	7.37454	1418.39	529	2.68126
GV11	0.99	2021	2021-04	0.308918	0.165551	0.460959	0.089882	0.0901187	0.0855187	0.0743726	0.518482	0.625062	0.64114	0.167584	0.541487	0.768729	0.7482	1.21831	11	5.7033	6.87568	7.05254	1.84343	5.95636	336.008	121	2.77692
DU15	0.37	2022	2022-01	0.0963048	0	0.132351	0.550182	0.560993	0.114922	0.130476	0.530877	0.631081	0.249936	1	0.843459	0.768567	0.747299	0.455311	10	5.30877	6.31081	2.49936	10	8.43459	319.677	100	3.19677
FU23	0.54	2021	2021-12	0.248114	0.00298638	0.352499	0.132169	0.123106	0.500926	0.216492	0.477971	1	0.539155	0.980251	0.506833	0.768231	0.687481	0.664453	11	5.25768	11	5.9307	10.7828	5.57516	297.293	121	2.45697
IB35	3.25	2021	2021-04	0.221874	0.384178	0.116371	0.0947985	0.076364	0.0324555	0.0320491	0.70556	0.395686	0	0.601141	0.543545	0.768061	0.735437	3.99886	10	7.0556	3.95686	0	6.01141	5.43545	301.986	100	3.01986
IH1B	0.84	2022	2022-07	0.214107	0.297343	0.200022	0.417147	0.410856	0.105625	0.095611	0.554145	0.580093	0.586646	0.170357	0.689544	0.767889	0.693372	1.03351	11	6.0956	6.38103	6.4531	1.87393	7.58498	357.033	121	2.95068
GJ1B	1.05	2022	2022-04	0.301884	0.183993	0.268731	0.106627	0.109293	0.0405545	0.0559709	0.626611	0.353762	0.635051	0.319979	0.369624	0.767505	0.730571	1.29176	11	6.89272	3.89138	6.98556	3.51977	4.06587	311.943	121	2.57804
JJ13	0.65	2022	2022-08	0.229854	0.258558	0.243039	0.171207	0.0869597	0.110033	0.0531155	1	0.491911	0.848686	0.542514	0.390126	0.766602	0.702818	0.799487	11	11	5.41102	9.33554	5.96765	4.29138	249.854	121	2.06491
GD19	1.7	2022	2022-04	0.325875	0.336999	0.099558	0.0549532	0.0538944	0.00595089	0.00651137	0.646858	0.350929	0.202204	0.733096	0.811068	0.766033	0.71975	2.09068	11	7.11544	3.86022	2.22425	8.06406	8.92174	328.788	121	2.71726
EV1A	0.38	2021	2021-12	0.33439	0.0413276	0.532396	0.0768868	0.0861792	0.0887167	0.175046	0.410276	0.292123	0.314669	0.672892	0.577959	0.763793	0.702932	0.467072	12	4.92331	3.50547	3.77603	8.07471	6.93551	429.749	144	2.98437
IS15	0.37	2022	2022-03	0.279027	0.0785814	0.116209	0.351695	0.414086	0.372557	0.251744	0.468065	1	0.145062	0.687824	0.944369	0.763686	0.734902	0.454769	10	4.68065	10	1.45062	6.87824	9.44369	283.434	100	2.83434
LC1A	2.6	2022	2022-01	0.215374	0.135225	0.147657	0.0227297	0.0207284	0.0253617	0.0272528	0.736751	0.449746	0.262747	0.594048	0	0.763077	0.736173	3.1952	11	8.10426	4.94721	2.89021	6.53453	0	330.682	121	2.73291
DU15	0.37	2022	2022-07	0.103041	0	0.0424632	0.654139	0.560993	0.167282	0.130476	0.739134	0.918607	0.169539	1	1	0.762776	0.747299	0.454668	10	7.39134	9.18607	1.69539	10	10	319.677	100	3.19677
FN19	6.1	2022	2022-05	0.168639	0.394929	0.0733378	0.0186364	0.0196552	0.0563948	0.0327908	0.452801	1	0	0.361919	0.514862	0.761857	0.736295	7.4942	11	4.98082	11	0	3.98111	5.66348	305.838	121	2.52758
GJ1B	1.05	2022	2022-01	0.314619	0.17071	0.22448	0.0974936	0.109293	0.057173	0.0559709	0.537593	0.639201	0.530689	0.511539	1	0.761754	0.730571	1.28995	11	5.91352	7.03121	5.83758	5.62693	11	311.943	121	2.57804
BR25	0.2	2021	2021-12	0.310718	0.0211406	0.43932	0.147323	0.173356	0.142866	0.188717	0.294889	0.210132	0.234732	0.429027	0.397759	0.761552	0.520874	0.245693	23	6.78244	4.83303	5.39884	9.86762	9.14846	1199.12	529	2.26677
QS31	2	2022	2022-10	0.300159	0.00476651	0.269077	0.152731	0.127668	0.128342	0.133124	0.412439	0.525617	0.169696	0.282526	0.694623	0.760987	0.69399	2.45659	11	4.53683	5.78179	1.86666	3.10778	7.64085	295.485	121	2.44203
JB25	0.95	2022	2022-03	0.0797659	0.377684	0.299242	0.085555	0.0627989	0.146643	0.116619	0.679807	0.439943	0.456598	0.664453	0	0.760731	0.701777	1.16681	11	7.47788	4.83937	5.02258	7.30898	0	251.888	121	2.08172
JJ13	0.65	2022	2022-05	0.232267	0.32384	0.251467	0.119044	0.0869597	0.223684	0.0531155	0.666869	1	0.841065	0.32365	0.335774	0.760415	0.702818	0.798281	11	7.33556	11	9.25172	3.56015	3.69351	249.854	121	2.06491
GV11	0.99	2021	2021-10	0.363826	0.046	0.478901	0.0583647	0.0901187	0.136816	0.0743726	0.281467	1	0.515909	0.768705	0.505958	0.760352	0.7482	1.21582	11	3.09614	11	5.675	8.45576	5.56554	336.008	121	2.77692
FT39	0.69	2022	2022-07	0.225031	0.0228677	0.474936	0.178441	0.150289	0.257962	0.217892	0.615761	0.716728	0.777233	0.138681	0.616198	0.759548	0.728031	0.847226	10	6.15761	7.16728	7.77233	1.38681	6.16198	295.51	100	2.9551
GZ19	0.54	2022	2022-05	0.275253	0.238381	0.465725	0.0872158	0.10713	0.0944825	0.0936129	0.226738	0.391287	0.176847	0.436403	0.0453525	0.759406	0.505005	0.663024	23	5.21497	8.99961	4.06748	10.0373	1.04311	1288.44	529	2.43561
LC1A	2.6	2022	2022-08	0.204798	0.137437	0.0850913	0.0261812	0.0207284	0.0262094	0.0272528	1	0.499393	0.400522	0.552338	1	0.759311	0.736173	3.19226	11	11	5.49333	4.40574	6.07572	11	330.682	121	2.73291
FM35	0.75	2022	2022-07	0.198562	0.520396	0.191593	0.060845	0.0530347	0.180945	0.14135	0.538474	0.442485	0.582212	0.93877	0.871476	0.759045	0.712878	0.920785	9	4.84627	3.98237	5.2399	8.44893	7.84328	200.73	81	2.47815
JU15	0.36	2021	2021-06	0.386106	0.0177836	0.304495	0.275216	0.220975	0.0978841	0.116215	0.516905	0.431179	0.450317	0.863251	0.726786	0.758654	0.669611	0.441935	12	6.20287	5.17415	5.4038	10.359	8.72144	428.343	144	2.9746
NE19	1.16	2022	2022-08	0.270698	0.471607	0.188614	0.0850417	0.0773797	0.0280135	0.0408401	0.713769	0.203398	0.591059	0.650456	0.613511	0.758371	0.742769	1.42391	11	7.85145	2.23738	6.50165	7.15501	6.74862	331.604	121	2.74053
NR1B	0.6	2021	2021-05	0.331723	0.171715	0.282202	0.044458	0.0515262	0.392928	0.374652	0.257083	0.639008	0.553681	0.464828	0.680853	0.758272	0.694285	0.736489	12	3.085	7.6681	6.64418	5.57794	8.17024	383.42	144	2.66264
HS13	1.25	2021	2021-11	0.420738	0	0.31792	0.132603	0.0796169	0.197293	0.213053	0.954441	0.377963	0.50538	1	0.392145	0.757519	0.715027	1.53407	11	10.4989	4.1576	5.55918	11	4.31359	307.367	121	2.54023
BD1B	4.55	2022	2022-08	0.215898	0.218655	0.175693	0.177198	0.204551	0.142323	0.0840451	0.220218	1	0.417114	0.624245	0.715958	0.757296	0.724348	5.58371	9	1.98196	9	3.75403	5.6182	6.44362	204.398	81	2.52343
RU21	0.6	2022	2022-03	0.38163	0	0.347256	0.0471803	0.0324178	0.542767	0.526096	0.63234	0.355773	0.450412	1	0.404824	0.757179	0.688747	0.736292	11	6.95574	3.9135	4.95453	11	4.45306	309.751	121	2.55992
NC1B	2.32	2022	2022-01	0.245933	0.458352	0.214351	0.0809554	0.0730232	0.0815705	0.0524605	0.501759	0.872285	0.54598	0.730486	0	0.757076	0.701672	2.84692	11	5.51934	9.59514	6.00578	8.03534	0	250.726	121	2.07211
RE13	1	2022	2022-04	0.564416	0.0180289	0.249935	0.0367675	0.0266549	0.374589	0.409508	0.934326	0.385255	0.104882	0.796948	0.801428	0.756797	0.721825	1.22704	11	10.2776	4.23781	1.1537	8.76643	8.81571	334.219	121	2.76214
DC19	1.22	2022	2022-08	0.290396	0.0461196	0.34293	0.263567	0.240549	0.147476	0.155263	0.709755	0.471145	0.203207	1	0.202583	0.756792	0.749675	1.49699	11	7.8073	5.18259	2.23528	11	2.22842	332.837	121	2.75072
GD19	1.7	2022	2022-07	0.298248	0.352487	0.0960541	0.0602732	0.0538944	0.00472381	0.00651137	0.742292	0.278567	0.409318	0.388382	0.839355	0.756304	0.71975	2.08572	11	8.16521	3.06423	4.5025	4.2722	9.2329	328.788	121	2.71726
BU21	0.95	2022	2022-04	0.15823	0	0.313804	0.465623	0.449641	0.214395	0.182268	0.359766	0.727149	0.427913	1	0.361854	0.756194	0.700506	1.16552	11	3.95742	7.99864	4.70704	11	3.9804	296.05	121	2.44669
HS13	1.25	2021	2021-07	0.409953	0.0484984	0.300439	0.138483	0.0796169	0.234158	0.213053	1	0.449782	0.567389	0.10148	0.50694	0.756032	0.715027	1.53351	11	11	4.9476	6.24128	1.11628	5.57634	307.367	121	2.54023
LD19	1.92	2022	2022-05	0.291888	0.328099	0.255092	0.03264	0.0314576	0.0654827	0.0520886	0.449332	0.370617	0.510055	0.371155	0.199294	0.754909	0.628429	2.35483	21	9.43598	7.78296	10.7112	7.79426	4.18518	854.077	441	1.93668
EX2A	0.54	2021	2021-12	0.338653	0.029874	0.43677	0.0709704	0.0793591	0.261168	0.22915	0.47196	0.414149	0.44228	0.199783	0.729647	0.754889	0.674885	0.662292	12	5.66352	4.96979	5.30736	2.3974	8.75577	412.021	144	2.86126
FN2B	1.16	2022	2022-09	0.212635	0.145115	0.234843	0.0381717	0.0378349	0.128337	0.065923	0.22882	1	0.486407	0.481215	0.378006	0.754763	0.703258	1.42266	11	2.51702	11	5.35048	5.29336	4.15807	272.949	121	2.25578
RE13	1	2022	2022-09	0.480083	0.0190586	0.296897	0.0325654	0.0266549	0.396432	0.409508	0.752336	0.470642	0.668326	0.785352	0.0603927	0.754693	0.721825	1.22641	11	8.27569	5.17706	7.35159	8.63887	0.66432	334.219	121	2.76214
RE11	1.12	2022	2022-09	0.483202	0.000463703	0.261931	0.0544326	0.0426106	0.433843	0.461528	0.503414	0.531046	0.610377	0.99283	0.310193	0.753432	0.721784	1.37315	11	5.53755	5.84151	6.71414	10.9211	3.41212	319.765	121	2.64268
JV29	0.39	2021	2021-09	0.303712	0	0.37183	0.138052	0.145205	0.383844	0.330717	0.432313	0.621049	0.38527	1	0.55176	0.753369	0.684766	0.478144	12	5.18776	7.45259	4.62323	12	6.62112	393.117	144	2.72998
LD19	1.92	2021	2021-09	0.338431	0.394042	0.199116	0.0302053	0.0314576	0.0477235	0.0520886	0.382354	0.225914	0.190585	0.168227	0.507394	0.753229	0.628429	2.35386	21	8.02944	4.7442	4.00229	3.53277	10.6553	854.077	441	1.93668
RE15	0.8	2022	2022-03	0.509959	0	0.237596	0.0213574	0.0164811	0.417934	0.423205	0.699328	0.348148	0.356086	1	0.672473	0.753113	0.714261	0.980747	11	7.6926	3.82963	3.91695	11	7.3972	313.253	121	2.58887
GJ1B	1.05	2022	2022-09	0.277538	0.182828	0.281846	0.139593	0.109293	0.0744798	0.0559709	0.947916	0.936462	0.834552	0.336776	0.182802	0.752933	0.730571	1.28717	11	10.4271	10.3011	9.18007	3.70453	2.01083	311.943	121	2.57804
FF2A	2.77	2022	2022-10	0.20032	0.25621	0.262646	0.0888641	0.0645231	0.0706453	0.0759176	0.872958	0.377698	0.139925	0.865261	0.17085	0.752398	0.731777	3.39524	9	7.85662	3.39928	1.25933	7.78735	1.53765	191.312	81	2.36188
FM29	3.92	2022	2022-11	0.138055	0.584228	0.0720124	0.0228168	0.0249894	0.100911	0.08127	0.428228	0.769474	0.564278	0.271319	0.885858	0.75172	0.713209	4.80402	11	4.71051	8.46421	6.20706	2.98451	9.74444	315.309	121	2.60586
FN19	6.1	2022	2022-09	0.164058	0.391196	0.100196	0.0285315	0.0196552	0.0362141	0.0327908	0.89106	0.560228	0.0492178	0.376995	0	0.751589	0.736295	7.47541	11	9.80166	6.16251	0.541396	4.14694	0	305.838	121	2.52758
LR1B	0.77	2021	2021-08	0.183543	0.0215616	0.459393	0.114612	0.111484	0.275274	0.311279	0.500383	0.332955	0.306662	0.0642295	0.376092	0.751322	0.504571	0.943555	23	11.5088	7.65797	7.05324	1.47728	8.65011	1340.96	529	2.53489
FT39	0.69	2022	2022-10	0.281794	0.00396403	0.442906	0.111956	0.150289	0.354064	0.217892	0.248412	0.983743	0.526063	0.850694	0.703691	0.751315	0.728031	0.845522	10	2.48412	9.83743	5.26063	8.50694	7.03691	295.51	100	2.9551
LC15	2.13	2022	2022-05	0.22844	0.133409	0.100454	0.0325649	0.0323338	0.0354567	0.0342939	0.423975	0.532274	0.155608	0.523554	0.909454	0.751312	0.72076	2.61009	11	4.66373	5.85502	1.71169	5.75909	10.004	312.614	121	2.58359
LD19	1.92	2021	2021-11	0.333018	0.411884	0.246196	0.0312497	0.0314576	0.0334363	0.0520886	0.411085	0.109502	0.22774	0.11332	0.248259	0.750807	0.628429	2.35246	21	8.63278	2.29954	4.78254	2.37973	5.21345	854.077	441	1.93668
GK2B	0.89	2022	2022-10	0.274734	0.230608	0.345284	0.123194	0.124827	0.101298	0.0880246	0.574046	0.987018	0.878152	0.373338	0.295088	0.750387	0.735022	1.09035	11	6.3145	10.8572	9.65968	4.10672	3.24597	323.041	121	2.66976
HS31	0.7	2021	2021-11	0.434582	0.0403098	0.37356	0.0581538	0.0573934	0.237551	0.280564	0.504615	0.197742	0.170486	0.325606	0.413353	0.750196	0.698924	0.857541	12	6.05538	2.3729	2.04583	3.90728	4.96023	339.832	144	2.35994
HJ19	3.04	2022	2022-03	0.421183	0.053435	0.272819	0.0274842	0.0274378	0.189223	0.198692	0.443631	0.423029	0.316224	0.977673	0.370465	0.750064	0.717283	3.72406	11	4.87994	4.65332	3.47846	10.7544	4.07512	315.083	121	2.60399
NE19	1.16	2022	2022-05	0.317359	0.423005	0.186969	0.0817063	0.0773797	0.0354973	0.0408401	0.639332	0.347353	0	0.827908	0.63037	0.749799	0.742769	1.42093	11	7.03265	3.82088	0	9.10699	6.93407	331.604	121	2.74053
FM29	3.92	2022	2022-02	0.128597	0.404778	0.107902	0.0367576	0.0249894	0.072505	0.08127	1	0.284922	0.649222	0.803853	0.343515	0.749655	0.713209	4.80159	11	11	3.13414	7.14144	8.84238	3.77866	315.309	121	2.60586
FN19	6.1	2022	2022-02	0.136652	0.382304	0.0871636	0.0141633	0.0196552	0.0328837	0.0327908	0.254681	0.487653	0.343722	0.412904	0.249823	0.74948	0.736295	7.47155	11	2.8015	5.36419	3.78095	4.54195	2.74805	305.838	121	2.52758
JJ13	0.65	2022	2022-04	0.233133	0.283003	0.253812	0.160915	0.0869597	0.0817969	0.0531155	0.934269	0.365681	0.838333	0.46056	0.320656	0.74934	0.702818	0.796121	11	10.277	4.02249	9.22166	5.06616	3.52721	249.854	121	2.06491
GK2B	0.89	2022	2022-03	0.345583	0.175556	0.303651	0.136087	0.124827	0.101744	0.0880246	0.857372	1	0.102172	1	0.783117	0.749293	0.735022	1.09006	11	9.43109	11	1.12389	11	8.61429	323.041	121	2.66976
QS31	2	2022	2022-01	0.225881	0.00664346	0.288902	0.246611	0.127668	0.176066	0.133124	1	0.856368	0.584109	0	0.624263	0.749203	0.69399	2.44952	11	11	9.42005	6.4252	0	6.86689	295.485	121	2.44203
BU21	0.95	2022	2022-01	0.196091	0	0.266907	0.434251	0.449641	0.230535	0.182268	0.322179	0.819638	0.273603	1	0.465015	0.749163	0.700506	1.16351	11	3.54397	9.01602	3.00964	11	5.11516	296.05	121	2.44669
LC15	2.13	2022	2022-08	0.225563	0.177349	0.180111	0.0364283	0.0323338	0.0357371	0.0342939	0.502978	0.540659	0.184877	0.0467994	0.579794	0.749117	0.72076	2.60869	11	5.53276	5.94725	2.03365	0.514793	6.37774	312.614	121	2.58359
RU25	0.3	2022	2022-07	0.300458	0.0366225	0.411341	0.0440055	0.0311818	0.490018	0.518124	0.337599	0.388956	0.265403	0.769014	0.66204	0.748959	0.681223	0.367406	11	3.71359	4.27852	2.91944	8.45915	7.28244	300.845	121	2.48632
GU25	0.48	2022	2022-06	0.37146	0.139858	0.370008	0.155953	0.125924	0.0635428	0.089466	0.493998	0.309254	0.410346	0.897083	0.630553	0.748464	0.707923	0.587779	11	5.43398	3.40179	4.51381	9.86792	6.93608	270.535	121	2.23583
IS15	0.37	2022	2022-06	0.161077	0.0440563	0.101905	0.597944	0.414086	0.266247	0.251744	1	0.482155	0.732301	0.82498	0.998696	0.748247	0.734902	0.453055	10	10	4.82155	7.32301	8.2498	9.98696	283.434	100	2.83434
MZ15	0.3	2021	2021-11	0.403044	0.0573856	0.4322	0.0272401	0.0314271	0.175354	0.157096	0.266388	0.49377	0.423564	0.746066	0.244513	0.748219	0.691861	0.36734	11	2.93027	5.43147	4.65921	8.20673	2.68964	278.834	121	2.30441
GU21	0.75	2021	2021-04	0.313924	0.136849	0.38844	0.115543	0.106704	0.0879388	0.0950602	0.483211	0.225151	0.456349	0.40352	0.687518	0.748074	0.690131	0.918317	12	5.79853	2.70181	5.47619	4.84224	8.25022	318.674	144	2.21302
FM19	4.58	2022	2022-06	0.13866	0.65697	0.10827	0.0177784	0.0274879	0.0732919	0.0679673	0.202243	0.67675	0.46353	0.302355	0.604404	0.747992	0.727429	5.60774	11	2.22467	7.44425	5.09883	3.32591	6.64844	336.768	121	2.78321
JB25	0.95	2022	2022-07	0.0787189	0.351785	0.245919	0.0715158	0.0627989	0.122382	0.116619	0.501764	0.30778	0.469704	0.882353	0.650304	0.747914	0.701777	1.16316	11	5.5194	3.38557	5.16674	9.70588	7.15334	251.888	121	2.08172
QS31	2	2022	2022-07	0.268871	0	0.315896	0.140378	0.127668	0.186169	0.133124	0.335123	0.926386	0.344259	1	0.528463	0.74749	0.69399	2.44849	11	3.68635	10.1902	3.78685	11	5.81309	295.485	121	2.44203
IH1B	0.84	2022	2022-06	0.394327	0.157515	0.169343	0.295939	0.410856	0.175038	0.095611	0.369567	0.961311	0	0.560502	0.779217	0.746847	0.693372	1.02821	11	4.06524	10.5744	0	6.16553	8.57138	357.033	121	2.95068
FU21	0.67	2021	2021-05	0.296608	0.0314572	0.322309	0.078928	0.0820816	0.282614	0.271951	0.350458	0.392074	0.546803	0.568822	0.766948	0.746377	0.691853	0.820022	11	3.85504	4.31282	6.01483	6.25704	8.43643	301.693	121	2.49333
NC1B	2.32	2022	2022-08	0.241285	0.437681	0.205456	0.0975213	0.0730232	0.0516362	0.0524605	0.794364	0.314921	0.621577	0.897002	0.221333	0.745939	0.701672	2.83917	11	8.73801	3.46413	6.83735	9.86702	2.43466	250.726	121	2.07211
GU21	0.75	2021	2021-03	0.321851	0.1268	0.474527	0.128012	0.106704	0.0540168	0.0950602	0.541598	0.114371	0.40979	0.447321	0.416085	0.745835	0.690131	0.917813	12	6.49918	1.37245	4.91748	5.36786	4.99302	318.674	144	2.21302
EV1A	0.38	2021	2021-04	0.375396	0.0200215	0.414431	0.0754392	0.0861792	0.196484	0.175046	0.397737	0.646973	0.188374	0.84153	0.795327	0.745643	0.702932	0.465003	12	4.77285	7.76368	2.26049	10.0984	9.54392	429.749	144	2.98437
FU21	0.67	2021	2021-07	0.294383	0.036406	0.300539	0.0955417	0.0820816	0.310507	0.271951	0.436772	0.521784	0.552821	0.50099	0.953194	0.745475	0.691853	0.81984	11	4.8045	5.73963	6.08104	5.51089	10.4851	301.693	121	2.49333
IB35	3.25	2021	2021-05	0.15968	0.27419	0.0788939	0.0811779	0.076364	0.0373373	0.0320491	0.604186	0.504378	0.58485	0.963615	0.965116	0.745464	0.735437	3.97683	10	6.04186	5.04378	5.8485	9.63615	9.65116	301.986	100	3.01986
FU21	0.67	2021	2021-12	0.22414	0.00262461	0.343117	0.203951	0.0820816	0.303029	0.271951	1	0.48701	0.742874	0.964025	0.588931	0.745231	0.691853	0.819791	11	11	5.3571	8.17162	10.6043	6.47824	301.693	121	2.49333
CZ1A	0.15	2021	2021-09	0.340509	0.0270965	0.159265	0.393743	0.33091	0.339541	0.301052	0.588011	0.640797	0.153954	0.746742	0.947289	0.744622	0.686816	0.183508	12	7.05614	7.68956	1.84745	8.9609	11.3675	367.124	144	2.54947
EX2A	0.54	2021	2021-10	0.306867	0.00402595	0.460326	0.0836405	0.0793591	0.288109	0.22915	0.556217	0.465693	0.64605	0.892159	0.650729	0.744586	0.674885	0.660623	12	6.6746	5.58831	7.7526	10.7059	7.80875	412.021	144	2.86126
GV11	0.99	2021	2021-11	0.496343	0.000986954	0.333629	0.0872835	0.0901187	0.0757204	0.0743726	0.498941	0.553445	0.213669	0.995037	0.793625	0.744312	0.7482	1.21106	11	5.48835	6.0879	2.35036	10.9454	8.72988	336.008	121	2.77692
FF31	3.15	2022	2022-06	0.152444	0.213109	0.114741	0.0320987	0.0404363	0.0433292	0.0325161	0.237623	0.819855	0.459322	0.486365	0.843941	0.744112	0.73711	3.85319	11	2.61386	9.0184	5.05254	5.35002	9.28336	320.42	121	2.6481
FR4B	0.38	2021	2021-07	0.211723	0.0795169	0.378743	0.114874	0.0996804	0.31005	0.305796	0.454665	0.678764	0.696964	0.913186	0.516442	0.743882	0.712815	0.464803	12	5.45598	8.14517	8.36357	10.9582	6.1973	362.648	144	2.51839
GJ1B	1.05	2022	2022-07	0.276735	0.178366	0.292752	0.129759	0.109293	0.0576172	0.0559709	0.85207	0.64683	0.841127	0.401122	0.0274319	0.743654	0.730571	1.28425	11	9.37277	7.11513	9.25239	4.41234	0.301751	311.943	121	2.57804
BU21	0.95	2022	2022-11	0.144918	0	0.144645	0.599879	0.449641	0.166084	0.182268	0.520617	0.450319	0.482168	1	0.733957	0.743544	0.700506	1.16191	11	5.72679	4.95351	5.30384	11	8.07353	296.05	121	2.44669
GU23	0.6	2021	2021-06	0.296869	0.171321	0.434367	0.115182	0.11158	0.0726531	0.105488	0.465402	0.255131	0.686169	0.428142	0.449947	0.74321	0.703572	0.733778	12	5.58483	3.06158	8.23403	5.1377	5.39936	347.226	144	2.41129
RE11	1.12	2022	2022-11	0.488486	0.0206686	0.257428	0.0452669	0.0426106	0.366082	0.461528	0.37875	0.293577	0.582924	0.680432	0.347554	0.743123	0.721784	1.36969	11	4.16626	3.22935	6.41217	7.48475	3.82309	319.765	121	2.64268
GJ1B	1.05	2022	2022-03	0.331976	0.20618	0.259094	0.0824671	0.109293	0.0574061	0.0559709	0.391135	0.643205	0.388464	0	0.506906	0.743001	0.730571	1.28405	11	4.30249	7.07526	4.2731	0	5.57597	311.943	121	2.57804
KT11	0.67	2021	2021-03	0.333975	0.0216274	0.413514	0.12143	0.109662	0.290223	0.293975	0.682764	0.495906	0.0317224	1	0.513627	0.742695	0.684715	0.819282	12	8.19317	5.95087	0.380668	12	6.16353	424.379	144	2.94707
HS31	0.7	2021	2021-12	0.449962	0.0117099	0.316235	0.0794937	0.0573934	0.29714	0.280564	0.771452	0.447058	0.0652634	0.80409	0.832628	0.742446	0.698924	0.855914	12	9.25743	5.36469	0.783161	9.64908	9.99153	339.832	144	2.35994
RS11	4	2021	2021-10	0.346373	0.00284172	0.31104	0.0909038	0.110087	0.115818	0.144228	0.277177	0.369447	0.273571	0.797717	0.461999	0.741321	0.688038	4.88959	12	3.32612	4.43336	3.28286	9.57261	5.54399	394.095	144	2.73677
GU23	0.6	2021	2021-10	0.363878	0.162766	0.313656	0.19363	0.11158	0.159919	0.105488	0.953482	0.82714	0.32631	0.456696	1	0.74091	0.703572	0.733364	12	11.4418	9.92568	3.91572	5.48035	12	347.226	144	2.41129
GR15	0.54	2021	2021-06	0.337148	0.0958156	0.25215	0.0812582	0.0524066	0.587175	0.497872	1	0.76736	0.61602	0.471444	0.912137	0.74082	0.710284	0.660013	12	12	9.20833	7.39224	5.65733	10.9456	376.036	144	2.61136
ES25	0.31	2021	2021-02	0.296127	0.0161999	0.444278	0.0498841	0.108724	0.183391	0.184974	0.248258	0.512801	0.320841	0.18408	0	0.740709	0.493476	0.378886	22	5.46168	11.2816	7.05849	4.04977	0	1295.21	484	2.67605
FM3A	0.93	2022	2022-09	0.196595	0.620062	0.204145	0.049465	0.0507178	0.192909	0.169174	0.342714	0.880858	0.610711	0.150569	0.699535	0.74053	0.700781	1.13661	11	3.76985	9.68944	6.71783	1.65626	7.69489	300.498	121	2.48346
GJ1B	1.05	2022	2022-11	0.287198	0.176932	0.294217	0.144936	0.109293	0.0781791	0.0559709	1	1	0.755388	0.421809	0.00657473	0.740286	0.730571	1.28319	11	11	11	8.30927	4.6399	0.0723221	311.943	121	2.57804
GK2B	0.89	2022	2022-01	0.354911	0.1977	0.285148	0.126214	0.124827	0.0944496	0.0880246	0.640417	0.78804	0	0.747939	1	0.740018	0.735022	1.08758	11	7.04458	8.66844	0	8.22733	11	323.041	121	2.66976
KD19	2.42	2021	2021-05	0.207928	0.556708	0.23599	0.0406893	0.0503618	0.00781991	0.0174265	0.425258	0.108492	0.39237	0.331948	0.316184	0.739454	0.572877	2.95684	21	8.93043	2.27832	8.23976	6.97091	6.63987	1034.8	441	2.34649
GK2B	0.89	2022	2022-06	0.292689	0.246082	0.326773	0.139772	0.124827	0.0763476	0.0880246	0.938366	0.262066	0.681503	0.197207	0.512076	0.739238	0.735022	1.08738	11	10.322	2.88273	7.49654	2.16928	5.63283	323.041	121	2.66976
RS11	4	2021	2021-01	0.326948	0.00108866	0.359996	0.0965178	0.110087	0.176425	0.144228	0.320125	0.709221	0.367568	0.922506	0.178353	0.739205	0.688038	4.88705	12	3.8415	8.51065	4.41082	11.0701	2.14024	394.095	144	2.73677
GV11	0.99	2021	2021-09	0.470909	0.0855621	0.305593	0.0833809	0.0901187	0.0379641	0.0743726	0.469592	0.277482	0.271677	0.569781	0.849141	0.739162	0.7482	1.20953	11	5.16552	3.0523	2.98844	6.26759	9.34055	336.008	121	2.77692
GR15	0.54	2021	2021-10	0.314249	0.118263	0.337059	0.0636452	0.0524066	0.403366	0.497872	0.736251	0.181014	0.680168	0.347613	0.478027	0.739111	0.710284	0.659736	12	8.83502	2.17216	8.16202	4.17135	5.73632	376.036	144	2.61136
ER3A	2	2022	2022-10	0.434863	0	0.246556	0.0619585	0.0811518	0.267647	0.200114	0.225278	0.742239	0.333397	1	0.401342	0.739069	0.716639	2.44344	9	2.0275	6.68015	3.00058	9	3.61208	212.158	81	2.61923
FR4B	0.38	2021	2021-09	0.245214	0.195302	0.351695	0.0931591	0.0996804	0.365832	0.305796	0.273919	0.915607	0.482267	0.193419	0.652936	0.738974	0.712815	0.464243	12	3.28703	10.9873	5.78721	2.32102	7.83524	362.648	144	2.51839
IG15	0.76	2021	2021-03	0.336423	0.519046	0.201259	0.082562	0.108034	0.0637213	0.0403671	0.173867	0.524829	0.0593464	0.259809	0.479336	0.738811	0.594168	0.928449	20	3.47734	10.4966	1.18693	5.19619	9.58672	794.489	400	1.98622
FM35	0.75	2022	2022-05	0.180169	0.510234	0.199496	0.0488321	0.0530347	0.18819	0.14135	0.426767	0.469234	0.704609	1	0.786623	0.737935	0.712878	0.916035	9	3.8409	4.22311	6.34148	9	7.07961	200.73	81	2.47815
IG15	0.76	2021	2021-07	0.257842	0.489317	0.231796	0.0696808	0.108034	0.0506874	0.0403671	0.146741	0.417478	0.447704	0.358671	0.269996	0.737881	0.594168	0.928237	20	2.93481	8.34956	8.95407	7.17342	5.39991	794.489	400	1.98622
BZ11	1.46	2021	2021-05	0.248366	0.0423038	0.343632	0.339798	0.517339	0.156101	0.156069	0.186352	0.534872	0.242242	0.0848803	0.0932712	0.737207	0.400378	1.7829	23	4.28609	12.3021	5.57157	1.95225	2.14524	1526.56	529	2.88575
FT39	0.69	2022	2022-05	0.213284	0	0.486388	0.136524	0.150289	0.305972	0.217892	0.384159	0.850122	0.829215	1	0.584917	0.737036	0.728031	0.842566	10	3.84159	8.50122	8.29215	10	5.84917	295.51	100	2.9551
FF2A	2.77	2022	2022-07	0.208637	0.354013	0.235922	0.0511775	0.0645231	0.0665925	0.0759176	0.428095	0.351076	0.0733325	0.676578	0.435833	0.736672	0.731777	3.38217	9	3.85285	3.15968	0.659993	6.0892	3.9225	191.312	81	2.36188
IG13	1.2	2022	2022-01	0.320351	0.311354	0.176719	0.208207	0.252028	0.0817752	0.0668449	0.292474	0.529506	0.0168156	0.494314	0.770406	0.736604	0.697405	1.46518	11	3.21721	5.82456	0.184971	5.43745	8.47447	303.308	121	2.50668
GK19	1.25	2022	2022-10	0.228952	0.183813	0.294875	0.0450002	0.0537676	0.0291363	0.0379419	0.36286	0.328449	0.49559	0.178022	0.447594	0.736594	0.739868	1.52622	11	3.99146	3.61294	5.45148	1.95824	4.92354	271.369	121	2.24272
BU21	0.95	2022	2022-10	0.234258	0.0203198	0.350471	0.328162	0.449641	0.233775	0.182268	0.195073	0.8382	0.118045	0.268575	0.281197	0.736529	0.700506	1.15991	11	2.14581	9.2202	1.29849	2.95432	3.09316	296.05	121	2.44669
LC1A	2.6	2022	2022-09	0.192925	0.166729	0.100009	0.023375	0.0207284	0.0252543	0.0272528	0.785973	0.443454	0.555182	0	0.761559	0.73588	0.736173	3.17399	11	8.6457	4.878	6.107	0	8.37715	330.682	121	2.73291
MZ15	0.3	2021	2021-04	0.32135	0.111647	0.423222	0.0351645	0.0314271	0.138254	0.157096	0.343882	0.31884	0.645295	0.505958	0.265242	0.73579	0.691861	0.366221	11	3.7827	3.50725	7.09824	5.56553	2.91766	278.834	121	2.30441
GK21	1.35	2022	2022-05	0.323353	0.175604	0.291754	0.118407	0.123622	0.049387	0.0734933	0.382288	0.261023	0.421657	0.730737	0.302625	0.73528	0.743348	1.64779	10	3.82288	2.61023	4.21657	7.30737	3.02625	249.95	100	2.4995
GK2B	0.89	2022	2022-05	0.332617	0.205207	0.316583	0.118068	0.124827	0.0730203	0.0880246	0.461396	0.165389	0.244181	0.66248	0.631527	0.735176	0.735022	1.08629	11	5.07536	1.81928	2.68599	7.28728	6.94679	323.041	121	2.66976
GK21	1.35	2022	2022-08	0.264984	0.209299	0.298109	0.157878	0.123622	0.0923083	0.0734933	1	0.919436	1	0.154535	0.263253	0.733621	0.743348	1.64712	10	10	9.19436	10	1.54535	2.63253	249.95	100	2.4995
FF31	3.15	2022	2022-09	0.254413	0.218864	0.160317	0.0312132	0.0404363	0.0341914	0.0325161	0.225493	0.646953	0	0.47188	0.734354	0.733504	0.73711	3.84316	11	2.48043	7.11649	0	5.19068	8.0779	320.42	121	2.6481
GD19	1.7	2022	2022-09	0.305943	0.34415	0.0761556	0.0746392	0.0538944	0.00558496	0.00651137	1	0.329349	0.351628	0.573932	1	0.733064	0.71975	2.07386	11	11	3.62284	3.86791	6.31325	11	328.788	121	2.71726
HJ19	3.04	2022	2022-05	0.392828	0.0503069	0.227378	0.0413343	0.0274378	0.268489	0.198692	1	1	0.540677	1	0.852571	0.732956	0.717283	3.70846	11	11	11	5.94744	11	9.37828	315.083	121	2.60399
KT11	0.67	2021	2021-05	0.278843	0.0863367	0.422625	0.094199	0.109662	0.296318	0.293975	0.313447	0.51209	0.812538	0.438131	0.442562	0.732842	0.684715	0.817301	12	3.76136	6.14508	9.75046	5.25757	5.31074	424.379	144	2.94707
HJ19	3.04	2022	2022-09	0.461131	0.106877	0.238365	0.0277274	0.0274378	0.170675	0.198692	0.453402	0.288022	0	0.596236	0.736006	0.732205	0.717283	3.70777	11	4.98742	3.16824	0	6.5586	8.09607	315.083	121	2.60399
NR1B	0.6	2021	2021-12	0.365795	0.103181	0.187313	0.0842122	0.0515262	0.338553	0.374652	0.579641	0.520431	0.43292	0.678422	1	0.732129	0.694285	0.731783	12	6.95569	6.24517	5.19504	8.14106	12	383.42	144	2.66264
GK39	0.92	2022	2022-02	0.305954	0.183934	0.293785	0.0894035	0.0873316	0.059773	0.0642698	0.603421	0.338922	0	0.911971	0.685412	0.732065	0.716715	1.12205	11	6.63763	3.72814	0	10.0317	7.53953	302.689	121	2.50157
EJ11	1.5	2022	2022-10	0.355057	0.0126132	0.417453	0.070448	0.0691882	0.226791	0.173798	0.254593	0.471984	0.0606352	0.735593	0.672086	0.731625	0.696983	1.82923	11	2.80052	5.19182	0.666987	8.09152	7.39295	257.543	121	2.12845
DU15	0.37	2022	2022-04	0.117247	0	0.0837302	0.550764	0.560993	0.182104	0.130476	0.532042	1	0	1	0.928133	0.731492	0.747299	0.451196	10	5.32042	10	0	10	9.28133	319.677	100	3.19677
EX2A	0.54	2021	2021-06	0.33641	0.0342755	0.399506	0.108447	0.0793591	0.253544	0.22915	0.721185	0.399563	0.456659	0.0818819	0.854492	0.731278	0.674885	0.658467	12	8.65422	4.79475	5.47991	0.982583	10.2539	412.021	144	2.86126
HJ19	3.04	2022	2022-01	0.401464	0.0589227	0.307738	0.0283889	0.0274378	0.203592	0.198692	0.479975	0.527617	0.472311	0.938505	0	0.731054	0.717283	3.70672	11	5.27972	5.80378	5.19542	10.3236	0	315.083	121	2.60399
EJ11	1.5	2022	2022-11	0.363943	0.0223036	0.428107	0.0809796	0.0691882	0.157718	0.173798	0.344731	0.314109	0	0.512223	0.644945	0.730878	0.696983	1.82889	11	3.79204	3.4552	0	5.63445	7.09439	257.543	121	2.12845
FM29	3.92	2022	2022-03	0.134963	0.464779	0.0937904	0.0253189	0.0249894	0.0633	0.08127	0.530852	0.127905	0.592056	0.625795	0.556764	0.730857	0.713209	4.77949	11	5.83937	1.40695	6.51261	6.88374	6.12441	315.309	121	2.60586
GV11	0.99	2021	2021-07	0.343533	0.198881	0.343969	0.0899013	0.0901187	0.071334	0.0743726	0.518627	0.521385	0.56219	0	0.773149	0.730725	0.7482	1.20703	11	5.70489	5.73523	6.1841	0	8.50463	336.008	121	2.77692
EJ11	1.5	2022	2022-07	0.321478	0.0270616	0.432367	0.0602594	0.0691882	0.201441	0.173798	0.167391	0.414043	0.289759	0.402548	0.63409	0.730461	0.696983	1.82871	11	1.8413	4.55447	3.18735	4.42802	6.97499	257.543	121	2.12845
CZ1A	0.15	2021	2021-04	0.351918	0.028316	0.22722	0.272757	0.33091	0.296364	0.301052	0.264725	0.398402	0.10233	0.735343	0.639271	0.730426	0.686816	0.182869	12	3.17669	4.78083	1.22796	8.82412	7.67126	367.124	144	2.54947
DC19	1.22	2022	2022-05	0.247948	0.333678	0.320377	0.196688	0.240549	0.135566	0.155263	0.41542	0.377932	0.787119	0.26307	0.357981	0.730258	0.749675	1.48727	11	4.56962	4.15726	8.65831	2.89377	3.93779	332.837	121	2.75072
GU23	0.6	2021	2021-08	0.302014	0.110203	0.45819	0.0803606	0.11158	0.18629	0.105488	0.24875	1	0.65854	0.632151	0.34139	0.730023	0.703572	0.731404	12	2.985	12	7.90248	7.58581	4.09667	347.226	144	2.41129
BR23	0.61	2021	2021-06	0.317252	0.0259232	0.451546	0.136763	0.136941	0.156113	0.177379	0.253118	0.223623	0.29675	0.380009	0.450317	0.72986	0.542907	0.743564	23	5.82172	5.14332	6.82525	8.7402	10.3573	1127.41	529	2.1312
EX2A	0.54	2021	2021-02	0.330828	0.00453762	0.464448	0.0710119	0.0793591	0.203619	0.22915	0.472236	0.304049	0.492445	0.878453	0.63692	0.729825	0.674885	0.658232	12	5.66683	3.64859	5.90934	10.5414	7.64304	412.021	144	2.86126
GD19	1.7	2022	2022-08	0.281487	0.369937	0.0830201	0.0596159	0.0538944	0.0138114	0.00651137	0.730502	0.814469	0.534979	0	0.944582	0.729644	0.71975	2.07212	11	8.03552	8.95916	5.88477	0	10.3904	328.788	121	2.71726
HS13	1.25	2021	2021-12	0.41195	0.000919439	0.341818	0.0488728	0.0796169	0.335442	0.213053	0.305677	0.647094	0.555909	0.982966	0.23521	0.729502	0.715027	1.52356	11	3.36244	7.11804	6.115	10.8126	2.58731	307.367	121	2.54023
NC1B	2.32	2022	2022-10	0.236562	0.546953	0.200867	0.0893104	0.0730232	0.0544383	0.0524605	0.649334	0.367094	0.6984	0.0167932	0.335515	0.729436	0.701672	2.82769	11	7.14268	4.03804	7.6824	0.184725	3.69066	250.726	121	2.07211
ER3A	2	2022	2022-05	0.447489	0.0230012	0.253821	0.0876117	0.0811518	0.214045	0.200114	0.479162	0.535253	0.249742	0	0.373318	0.729354	0.716639	2.43761	9	4.31245	4.81728	2.24768	0	3.35986	212.158	81	2.61923
LC1A	2.6	2022	2022-04	0.190293	0.145448	0.11895	0.0147619	0.0207284	0.0347572	0.0272528	0.129028	1	0.589463	0.401275	0.458826	0.728714	0.736173	3.1684	11	1.41931	11	6.48409	4.41402	5.04709	330.682	121	2.73291
EV1A	0.38	2021	2021-07	0.234654	0.0902226	0.44628	0.0651362	0.0861792	0.288991	0.175046	0.308497	0.951577	0.621845	0.285889	0.736641	0.728692	0.702932	0.463071	12	3.70197	11.4189	7.46214	3.43067	8.83969	429.749	144	2.98437
JB25	0.95	2022	2022-04	0.107067	0.34438	0.286072	0.0598056	0.0627989	0.24945	0.116619	0.353257	1	0.114846	0.944652	0.16062	0.728362	0.701777	1.15758	11	3.88583	11	1.26331	10.3912	1.76682	251.888	121	2.08172
NE19	1.16	2022	2022-03	0.270981	0.532567	0.182006	0.0654249	0.0773797	0.0346709	0.0408401	0.275969	0.331456	0.587478	0.427879	0.681216	0.72823	0.742769	1.41342	11	3.03565	3.64601	6.46226	4.70667	7.49338	331.604	121	2.74053
NC1B	2.32	2022	2022-04	0.263307	0.490499	0.19807	0.0609634	0.0730232	0.0543799	0.0524605	0.148639	0.366007	0.263403	0.471538	0.405098	0.728184	0.701672	2.82682	11	1.63503	4.02608	2.89744	5.18692	4.45608	250.726	121	2.07211
FM29	3.92	2022	2022-06	0.196063	0.552821	0.123491	0.0300084	0.0249894	0.0656665	0.08127	0.723188	0.168271	0.0433069	0.36452	0.10795	0.727826	0.713209	4.77592	11	7.95507	1.85099	0.476376	4.00972	1.18745	315.309	121	2.60586
BU21	0.95	2022	2022-09	0.194002	0.0277811	0.325527	0.366188	0.449641	0.221171	0.182268	0.240632	0.765976	0.282117	0	0.336065	0.727758	0.700506	1.15741	11	2.64695	8.42574	3.10328	0	3.69672	296.05	121	2.44669
RE13	1	2022	2022-05	0.514577	0.0194087	0.274749	0.0174389	0.0266549	0.443567	0.409508	0.0972246	0.654907	0.437866	0.781409	0.409883	0.72775	0.721825	1.21833	11	1.06947	7.20398	4.81652	8.5955	4.50872	334.219	121	2.76214
FR41	0.75	2021	2021-12	0.185172	0.225668	0.338723	0.2118	0.133241	0.270101	0.257391	0.663638	0.57463	0.947732	0.464821	0.639786	0.72749	0.691114	0.913685	12	7.96365	6.89556	11.3728	5.57785	7.67743	387.709	144	2.69243
LK1B	1.67	2022	2022-11	0.293084	0.331823	0.321713	0.0131453	0.0234044	0.089173	0.0478906	0.228903	0.628888	0.189401	0	0.198504	0.726944	0.427126	2.0342	21	4.80697	13.2067	3.97742	0	4.16859	1226.05	441	2.78015
FU21	0.67	2021	2021-11	0.326371	0.0729565	0.359951	0.0762948	0.0820816	0.291816	0.271951	0.336777	0.434867	0.466274	0	0.444907	0.726606	0.691853	0.816048	11	3.70455	4.78353	5.12902	0	4.89398	301.693	121	2.49333
FR41	0.75	2021	2021-09	0.310555	0.113699	0.347754	0.0891837	0.133241	0.279722	0.257391	0.117131	0.600929	0.25394	0.730359	0.606564	0.726386	0.691114	0.913437	12	1.40557	7.21115	3.04729	8.76431	7.27877	387.709	144	2.69243
FM29	3.92	2022	2022-01	0.111268	0.402888	0.102479	0.0204959	0.0249894	0.0855173	0.08127	0.333039	0.506885	0.804861	0.809463	0.425463	0.726003	0.713209	4.77378	11	3.66343	5.57573	8.85347	8.90409	4.6801	315.309	121	2.60586
FT39	0.69	2022	2022-09	0.36317	0.00295377	0.361212	0.117357	0.150289	0.348785	0.217892	0.278252	0.969074	0.16598	0.888745	0.926844	0.725329	0.728031	0.840143	10	2.78252	9.69074	1.6598	8.88745	9.26844	295.51	100	2.9551
GU21	0.75	2021	2021-05	0.37892	0.100789	0.432249	0.101392	0.106704	0.0586456	0.0950602	0.416945	0.129487	0.074571	0.560693	0.549386	0.725252	0.690131	0.913182	12	5.00334	1.55385	0.894851	6.72831	6.59263	318.674	144	2.21302
GU25	0.48	2022	2022-01	0.359263	0.17464	0.415265	0.100456	0.125924	0.109664	0.089466	0.067836	0.635465	0.464657	0.710082	0.468624	0.725029	0.707923	0.584404	11	0.746196	6.99011	5.11123	7.81091	5.15486	270.535	121	2.23583
JV29	0.39	2021	2021-05	0.296004	0.0665054	0.330095	0.196103	0.145205	0.204542	0.330717	0.71825	0.0707648	0.417777	0.614904	0.672064	0.724999	0.684766	0.474825	12	8.619	0.849177	5.01332	7.37884	8.06476	393.117	144	2.72998
BD1B	4.55	2022	2022-04	0.22862	0.581907	0.18496	0.277527	0.204551	0.0422224	0.0840451	0.710307	0.271404	0.325949	0	0.655996	0.724766	0.724348	5.5393	9	6.39276	2.44264	2.93354	0	5.90397	204.398	81	2.52343
RU23	0.4	2022	2022-04	0.309689	0.0440016	0.392105	0.0223103	0.0239766	0.629479	0.512717	0.296479	0.71337	0.580381	0	0.636635	0.724708	0.695445	0.486965	11	3.26127	7.84708	6.38419	0	7.00299	277.145	121	2.29045
FW21	0.8	2021	2021-07	0.320591	0	0.314459	0.128313	0.0769756	0.394004	0.186925	0.519374	0.510382	0.596766	1	0.6136	0.724668	0.633574	0.97392	12	6.23248	6.12458	7.16119	12	7.3632	387.787	144	2.69297
RE13	1	2022	2022-06	0.515492	0.000675157	0.283562	0.0214573	0.0266549	0.413337	0.409508	0.271254	0.53673	0.431752	0.992396	0.270805	0.724616	0.721825	1.21738	11	2.9838	5.90403	4.74927	10.9164	2.97885	334.219	121	2.76214
DE15	1.2	2021	2021-07	0.304559	0.61556	0.188703	0.0326948	0.0215251	0.0471381	0.071734	0.32825	0.207135	0.368786	0.442173	0.655126	0.724537	0.695681	1.46083	10	3.2825	2.07135	3.68786	4.42173	6.55126	197.775	100	1.97775
GK39	0.92	2022	2022-05	0.296218	0.179673	0.310957	0.0970729	0.0873316	0.0559576	0.0642698	0.845938	0.21359	0.125661	1	0.363489	0.724366	0.716715	1.11993	11	9.30532	2.34949	1.38227	11	3.99838	302.689	121	2.50157
FF2A	2.77	2022	2022-08	0.174788	0.224423	0.27971	0.0611766	0.0645231	0.0664437	0.0759176	0.546127	0.350098	0.34436	0.926584	0.00164732	0.724315	0.731777	3.37191	9	4.91514	3.15089	3.09924	8.33926	0.0148259	191.312	81	2.36188
BD1B	4.55	2022	2022-10	0.166513	0.325443	0.168697	0.163236	0.204551	0.110388	0.0840451	0.152016	0.76756	0.771008	0.440731	0.761228	0.724311	0.724348	5.53868	9	1.36814	6.90804	6.93907	3.96658	6.85105	204.398	81	2.52343
IF5B	0.86	2022	2022-02	0.247909	0.520299	0.177244	0.0321737	0.0275106	0.0401239	0.0374287	0.405281	0.474363	0.493859	0.367614	0.439222	0.724305	0.517695	1.04687	21	8.51089	9.96162	10.371	7.71989	9.22365	1052.2	441	2.38594
FM3A	0.93	2022	2022-02	0.191782	0.494975	0.220555	0.0653385	0.0507178	0.154317	0.169174	0.599092	0.325272	0.678251	1	0.3728	0.724247	0.700781	1.13206	11	6.59002	3.57799	7.46077	11	4.1008	300.498	121	2.48346
GJ1B	1.05	2022	2022-06	0.264904	0.201092	0.258063	0.1099	0.109293	0.0548043	0.0559709	0.658517	0.598516	0.938081	0.0733771	0.521605	0.724079	0.730571	1.27809	11	7.24368	6.58367	10.3189	0.807148	5.73765	311.943	121	2.57804
DU15	0.37	2022	2022-03	0.0823275	0.0256667	0.0527929	0.554121	0.560993	0.106416	0.130476	0.538768	0.58437	0.416746	0	0.982011	0.723968	0.747299	0.45036	10	5.38768	5.8437	4.16746	0	9.82011	319.677	100	3.19677
GR15	0.54	2021	2021-09	0.310861	0.170822	0.318908	0.0368002	0.0524066	0.522043	0.497872	0.334255	0.559592	0.689659	0.0576799	0.570826	0.723676	0.710284	0.657235	12	4.01106	6.7151	8.2759	0.692159	6.84991	376.036	144	2.61136
LL19	1.1	2022	2022-09	0.158225	0.0052598	0.383029	0.133895	0.0864473	0.125604	0.0680684	1	0.762828	1	0.680038	0.155146	0.723335	0.687178	1.3387	11	11	8.39111	11	7.48042	1.7066	278.147	121	2.29874
XS13	0.37	2021	2021-03	0.247999	0.0773649	0.462355	0.138453	0.234235	0.215025	0.140866	0.147419	0.706274	0.176621	0.156611	0.679407	0.722863	0.66988	0.450238	12	1.76903	8.47529	2.11945	1.87934	8.15288	357.63	144	2.48354
FR41	0.75	2021	2021-01	0.218096	0.0679932	0.389446	0.159179	0.133241	0.224039	0.257391	0.429103	0.448724	0.76555	0.838752	0.453198	0.72277	0.691114	0.912623	12	5.14924	5.38469	9.1866	10.065	5.43837	387.709	144	2.69243
FR41	0.75	2021	2021-06	0.356448	0.0939215	0.35246	0.126218	0.133241	0.202546	0.257391	0.282197	0.389975	0	0.777262	0.589253	0.721982	0.691114	0.912446	12	3.38636	4.6797	0	9.32714	7.07104	387.709	144	2.69243
ER3A	2	2022	2022-08	0.421032	0	0.235611	0.0680899	0.0811518	0.172804	0.200114	0.285959	0.375999	0.425036	1	0.443566	0.721795	0.716639	2.43308	9	2.57363	3.38399	3.82532	9	3.9921	212.158	81	2.61923
FN19	6.1	2022	2022-01	0.0863057	0.322873	0.0744822	0.0190956	0.0196552	0.0257255	0.0327908	0.473138	0.331664	0.884735	0.652913	0.492923	0.721491	0.736295	7.42033	11	5.20452	3.6483	9.73209	7.18204	5.42215	305.838	121	2.52758
IG13	1.2	2022	2022-02	0.323396	0.274694	0.243549	0.160204	0.252028	0.0573663	0.0668449	0.200447	0.361236	0	0.581299	0.347091	0.721398	0.697405	1.4597	11	2.20491	3.9736	0	6.39429	3.81801	303.308	121	2.50668
BD1B	4.55	2022	2022-09	0.179324	0.362002	0.180259	0.148223	0.204551	0.130442	0.0840451	0.0786804	0.913524	0.679201	0.377905	0.68641	0.721246	0.724348	5.5345	9	0.708123	8.22172	6.11281	3.40115	6.17769	204.398	81	2.52343
LC15	2.13	2022	2022-10	0.155463	0.0994381	0.261	0.0607336	0.0323338	0.0510946	0.0342939	1	1	0.898072	0.89215	0.245035	0.72097	0.72076	2.5907	11	11	11	9.87879	9.81365	2.69538	312.614	121	2.58359
HS13	1.25	2021	2021-08	0.442668	0.0501157	0.342268	0.0515513	0.0796169	0.164791	0.213053	0.32643	0.314645	0.379279	0.0715156	0.232257	0.720812	0.715027	1.5203	11	3.59074	3.4611	4.17207	0.786671	2.55482	307.367	121	2.54023
BZ13	0.68	2021	2021-07	0.258873	0.0321539	0.292663	0.355351	0.480774	0.201535	0.194567	0.112946	0.544512	0.0246415	0.223351	0.36307	0.720542	0.477125	0.826991	23	2.59776	12.5238	0.566754	5.13707	8.35061	1327.2	529	2.50888
IS15	0.37	2022	2022-08	0.198352	0.149884	0.262022	0.358128	0.414086	0.185415	0.251744	0.48196	0.0884149	0.546719	0.404566	0.390565	0.720529	0.734902	0.449979	10	4.8196	0.884149	5.46719	4.04566	3.90565	283.434	100	2.83434
DC19	1.22	2022	2022-07	0.233208	0.106579	0.317717	0.285726	0.240549	0.21505	0.155263	0.80728	1	0.989888	0.845059	0.376309	0.720462	0.749675	1.48369	11	8.88008	11	10.8888	9.29565	4.1394	332.837	121	2.75072
JU15	0.36	2021	2021-10	0.436774	0.0310286	0.189784	0.256082	0.220975	0.134404	0.116215	0.471603	0.592049	0.326361	0.761401	0.990891	0.720449	0.669611	0.437809	12	5.65924	7.10459	3.91633	9.13681	11.8907	428.343	144	2.9746
RS11	4	2021	2021-08	0.263206	0.00208726	0.390778	0.150135	0.110087	0.126926	0.144228	0.730306	0.43172	0.676006	0.851422	0	0.720091	0.688038	4.86411	12	8.76367	5.18064	8.11207	10.2171	0	394.095	144	2.73677
IG13	1.2	2022	2022-11	0.206825	0.37102	0.140473	0.240399	0.252028	0.119518	0.0668449	0.354192	0.789693	0.64385	0.352738	1	0.719668	0.697405	1.45908	11	3.89612	8.68663	7.08235	3.88012	11	303.308	121	2.50668
RS11	4	2021	2021-07	0.323004	0.00372354	0.30391	0.095886	0.110087	0.0815518	0.144228	0.315291	0.177347	0.38665	0.734947	0.503316	0.719656	0.688038	4.86359	12	3.78349	2.12816	4.6398	8.81936	6.03979	394.095	144	2.73677
LL19	1.1	2022	2022-10	0.187779	0.00373853	0.32658	0.103605	0.0864473	0.112558	0.0680684	0.585153	0.659322	0.74382	0.77258	1	0.719655	0.687178	1.33749	11	6.43668	7.25254	8.18202	8.49838	11	278.147	121	2.29874
IF5B	0.86	2021	2021-06	0.300573	0.520034	0.173386	0.017326	0.0275106	0.0414529	0.0374287	0.144211	0.495843	0.113093	0.369059	0.502486	0.719544	0.517695	1.04564	21	3.02843	10.4127	2.37495	7.75025	10.5522	1052.2	441	2.38594
LC15	2.13	2022	2022-01	0.215031	0.155475	0.118168	0.0267405	0.0323338	0.0281441	0.0342939	0.304872	0.313553	0.292029	0.284138	0.836144	0.719474	0.72076	2.58974	11	3.35359	3.44909	3.21232	3.12552	9.19758	312.614	121	2.58359
GK39	0.92	2022	2022-01	0.300551	0.179953	0.278524	0.0917744	0.0873316	0.0697549	0.0642698	0.678391	0.666818	0.0697285	0.994205	0.971489	0.719398	0.716715	1.11855	11	7.4623	7.33499	0.767014	10.9363	10.6864	302.689	121	2.50157
LD19	1.92	2022	2022-07	0.332574	0.369264	0.257589	0.0451051	0.0314576	0.0482768	0.0520886	0.792232	0.230423	0.230783	0.244478	0.185549	0.719354	0.628429	2.33435	21	16.6369	4.83888	4.84645	5.13404	3.89653	854.077	441	1.93668
GK2B	0.89	2022	2022-07	0.263609	0.242783	0.353482	0.142577	0.124827	0.0884344	0.0880246	1	0.61326	1	0.234754	0.198998	0.719209	0.735022	1.08203	11	11	6.74586	11	2.5823	2.18898	323.041	121	2.66976
GR15	0.54	2021	2021-08	0.235583	0.0754664	0.327574	0.0805618	0.0524066	0.64533	0.497872	0.989573	0.952877	0.900537	0.583698	0.526519	0.719101	0.710284	0.656494	12	11.8749	11.4345	10.8064	7.00437	6.31823	376.036	144	2.61136
LD19	1.92	2022	2022-01	0.330407	0.413483	0.201185	0.0336314	0.0314576	0.101544	0.0520886	0.476603	0.664448	0.24566	0.108399	0.496005	0.719021	0.628429	2.33416	21	10.0087	13.9534	5.15887	2.27638	10.4161	854.077	441	1.93668
NR1B	0.6	2021	2021-10	0.48794	0.00761801	0.277794	0.0682014	0.0515262	0.392861	0.374652	0.449733	0.638861	0	0.976257	0.695679	0.718988	0.694285	0.729418	12	5.39679	7.66633	0	11.7151	8.34815	383.42	144	2.66264
GK19	1.25	2022	2022-11	0.186962	0.175093	0.30087	0.0329397	0.0537676	0.0360039	0.0379419	0.259622	0.41094	0.749226	0.236474	0.42404	0.718958	0.739868	1.51961	11	2.85584	4.52034	8.24149	2.60121	4.66444	271.369	121	2.24272
HS31	0.7	2021	2021-10	0.342764	0.0311314	0.381395	0.033743	0.0573934	0.383413	0.280564	0.199379	0.808015	0.798663	0.479163	0.356049	0.718951	0.698924	0.85098	12	2.39255	9.69618	9.58395	5.74996	4.27259	339.832	144	2.35994
EV1A	0.38	2021	2021-02	0.262064	0.003463	0.536051	0.115046	0.0861792	0.0855894	0.175046	0.740798	0.281825	0.537426	0.97259	0.571224	0.718936	0.702932	0.461959	12	8.88958	3.3819	6.44911	11.6711	6.85469	429.749	144	2.98437
JU15	0.36	2021	2021-09	0.348303	0.0240364	0.310846	0.18537	0.220975	0.0998938	0.116215	0.30418	0.440032	0.542799	0.815169	0.712165	0.718912	0.669611	0.437642	12	3.65016	5.28038	6.51359	9.78202	8.54598	428.343	144	2.9746
HS13	1.25	2021	2021-06	0.431112	0.0256062	0.225357	0.130789	0.0796169	0.120792	0.213053	0.940383	0.22893	0.445728	0.525599	1	0.718165	0.715027	1.51931	11	10.3442	2.51823	4.90301	5.78159	11	307.367	121	2.54023
RU23	0.4	2022	2022-03	0.350637	0.0022559	0.304787	0.0559381	0.0239766	0.725646	0.512717	1	1	0.356268	0.948731	1	0.717968	0.695445	0.486156	11	11	11	3.91895	10.436	11	277.145	121	2.29045
IS15	0.37	2022	2022-02	0.107308	0	0.15561	0.591243	0.414086	0.304035	0.251744	0.985524	0.666226	1	1	0.794724	0.717886	0.734902	0.449685	10	9.85524	6.66226	10	10	7.94724	283.434	100	2.83434
EV1A	0.38	2021	2021-05	0.206076	0.126343	0.457876	0.0837754	0.0861792	0.239765	0.175046	0.469942	0.789489	0.709862	0	0.715272	0.717793	0.702932	0.461828	12	5.6393	9.47387	8.51834	0	8.58327	429.749	144	2.98437
RS11	4	2021	2021-12	0.313949	0	0.254347	0.124413	0.110087	0.14782	0.144228	0.533528	0.548855	0.43047	1	0.790481	0.71777	0.688038	4.86132	12	6.40234	6.58626	5.16563	12	9.48578	394.095	144	2.73677
BY31	1.3	2022	2022-07	0.0426608	0	0.0846778	0.841045	0.841067	0.120551	0.115014	0.662055	0.368013	0.785762	1	0.419782	0.717765	0.685226	1.57993	11	7.28261	4.04814	8.64339	11	4.6176	361.246	121	2.98551
LZ1B	0.3	2021	2021-02	0.239605	0.154463	0.279728	0.262645	0.101848	0.217405	0.116296	1	0.89409	0.834405	0.4322	0.765416	0.717659	0.680504	0.364589	12	12	10.7291	10.0129	5.18639	9.18499	362.611	144	2.51813
GJ1B	1.05	2022	2022-10	0.267168	0.195551	0.294678	0.119021	0.109293	0.0669497	0.0559709	0.747408	0.807125	0.919528	0.153286	0	0.717657	0.730571	1.27606	11	8.22149	8.87837	10.1148	1.68614	0	311.943	121	2.57804
GR15	0.54	2021	2021-03	0.284682	0.0940227	0.349618	0.0302054	0.0524066	0.660103	0.497872	0.2355	1	0.762993	0.481334	0.413817	0.717553	0.710284	0.656244	12	2.826	12	9.15592	5.77601	4.9658	376.036	144	2.61136
RC19	4.5	2022	2022-06	0.741564	0.0669476	0.195687	0.0162347	0.00941406	0.0761733	0.116275	1	0.134385	0.538869	0.0628371	0.395764	0.717379	0.673693	5.46846	11	11	1.47824	5.92756	0.691208	4.3534	309.115	121	2.55467
IF5B	0.86	2021	2021-11	0.306261	0.490906	0.199263	0.0183249	0.0275106	0.0420936	0.0374287	0.161775	0.506197	0.0719687	0.528065	0.0781405	0.717161	0.517695	1.04503	21	3.39727	10.6301	1.51134	11.0894	1.64095	1052.2	441	2.38594
FT39	0.69	2022	2022-04	0.252726	0.0265497	0.422594	0.21996	0.150289	0.0908017	0.217892	0.845171	0.252286	0.654688	0	0.759175	0.717146	0.728031	0.838449	10	8.45171	2.52286	6.54688	0	7.59175	295.51	100	2.9551
LZ1B	0.3	2021	2021-06	0.304027	0.0741269	0.364783	0.120267	0.101848	0.0699788	0.116296	0.396082	0.24452	0.601385	0.811725	0.498473	0.717114	0.680504	0.36454	12	4.75298	2.93425	7.21663	9.7407	5.98168	362.611	144	2.51813
GR15	0.54	2021	2021-04	0.326788	0.0530293	0.430557	0.0659817	0.0524066	0.422483	0.497872	0.771239	0.241996	0.645041	0.70747	0	0.717028	0.710284	0.656159	12	9.25487	2.90395	7.74049	8.48964	0	376.036	144	2.61136
BY31	1.3	2022	2022-05	0.108589	0.000711012	0.0424853	0.802633	0.841067	0.163421	0.115014	0.514525	0.527376	0	0.0445782	0.912832	0.716948	0.685226	1.57961	11	5.65978	5.80114	0	0.49036	10.0412	361.246	121	2.98551
FM35	0.75	2022	2022-01	0.178374	0.636217	0.195813	0.0689393	0.0530347	0.112038	0.14135	0.613743	0.188072	0.716555	0.240907	0.826159	0.716861	0.712878	0.911294	9	5.52368	1.69265	6.44899	2.16816	7.43543	200.73	81	2.47815
JB25	0.95	2022	2022-08	0.0920733	0.449734	0.246547	0.0749716	0.0627989	0.0922608	0.116619	0.54559	0.143691	0.302538	0.058258	0.642644	0.716807	0.701777	1.15429	11	6.00149	1.5806	3.32792	0.640838	7.06908	251.888	121	2.08172
LD19	1.92	2022	2022-03	0.298896	0.408063	0.283752	0.0237	0.0314576	0.0750171	0.0520886	0.203401	0.448304	0.461949	0.125078	0.0415406	0.716602	0.628429	2.33276	21	4.27143	9.41439	9.70092	2.62665	0.872352	854.077	441	1.93668
GU21	0.75	2021	2021-01	0.299567	0.137308	0.4219	0.122457	0.106704	0.0343435	0.0950602	0.515588	0.0501228	0.540683	0.401519	0.582018	0.716553	0.690131	0.911224	12	6.18705	0.601473	6.48819	4.81822	6.98422	318.674	144	2.21302
FM35	0.75	2022	2022-11	0.240546	0.547344	0.210378	0.00293807	0.0530347	0.331948	0.14135	0	1	0.302826	0.776401	0.669798	0.716432	0.712878	0.911197	9	0	9	2.72543	6.98761	6.02818	200.73	81	2.47815
BY31	1.3	2022	2022-03	0.0503352	0.000744186	0.0697475	0.886476	0.841067	0.0878271	0.115014	0.836541	0.246365	0.694294	0	0.594254	0.716423	0.685226	1.57941	11	9.20195	2.71002	7.63724	0	6.53679	361.246	121	2.98551
LL19	1.1	2022	2022-05	0.248706	0.0109557	0.369088	0.0937458	0.0864473	0.0341844	0.0680684	0.450123	0.0375052	0.215698	0.333547	0.363787	0.716379	0.687178	1.33641	11	4.95135	0.412557	2.37268	3.66902	4.00166	278.147	121	2.29874
RE11	1.12	2022	2022-10	0.529025	0.000398689	0.258014	0.0342827	0.0426106	0.417707	0.461528	0.229354	0.474495	0.372323	0.993836	0.342693	0.716316	0.721784	1.36068	11	2.5229	5.21945	4.09555	10.9322	3.76963	319.765	121	2.64268
LD19	1.92	2021	2021-10	0.34814	0.385648	0.20124	0.0309757	0.0314576	0.029399	0.0520886	0.403549	0.0766053	0.123943	0.194057	0.4957	0.71623	0.628429	2.33255	21	8.47453	1.60871	2.60279	4.07519	10.4097	854.077	441	1.93668
FR29	1.35	2021	2021-01	0.157737	0.0912149	0.253	0.302558	0.099568	0.100233	0.146592	0.635953	0.10177	0.497654	0.824899	0.276483	0.715843	0.674634	1.63992	12	7.63144	1.22124	5.97184	9.89878	3.31779	246.003	144	1.70835
GJ1B	1.05	2022	2022-05	0.32135	0.136839	0.263919	0.0903111	0.109293	0.0338474	0.0559709	0.467587	0.23856	0.475535	1	0.438172	0.715813	0.730571	1.27548	11	5.14346	2.62416	5.23089	11	4.81989	311.943	121	2.57804
IH1B	0.84	2022	2022-09	0.143891	0.0559147	0.119119	0.681419	0.410856	0.150907	0.095611	0.956585	0.828782	0.815211	0.843987	0.926019	0.715525	0.693372	1.02031	11	10.5224	9.1166	8.96732	9.28386	10.1862	357.033	121	2.95068
HZ13	0.62	2021	2021-12	0.297737	0.0739182	0.554423	0.0359956	0.224733	0.137252	0.156183	0	0.376815	0.176873	0.148707	0.280535	0.715287	0.4508	0.753043	23	0	8.66674	4.06809	3.42027	6.45231	1494.59	529	2.82532
FU23	0.54	2021	2021-04	0.199706	0.0457772	0.357999	0.150062	0.123106	0.169332	0.216492	0.575066	0.192836	0.824547	0.697281	0.486567	0.715166	0.687481	0.655857	11	6.32572	2.1212	9.07002	7.67009	5.35224	297.293	121	2.45697
IF49	3	2021	2021-10	0.264438	0.301719	0.117215	0.0456539	0.0379185	0.0775976	0.0643597	0.486203	0.59911	0.0825345	0.503402	0.482044	0.714896	0.533905	3.64341	21	10.2103	12.5813	1.73322	10.5714	10.1229	1088.59	441	2.46847
FM29	3.92	2022	2022-08	0.106053	0.574281	0.0846347	0.0345942	0.0249894	0.0696712	0.08127	0.911271	0.236584	0.851697	0.300837	0.695119	0.714659	0.713209	4.76044	11	10.024	2.60242	9.36866	3.30921	7.6463	315.309	121	2.60586
EJ11	1.5	2022	2022-09	0.348857	0.0245127	0.426227	0.0551736	0.0691882	0.184255	0.173798	0.123864	0.374763	0.102941	0.461301	0.649734	0.714472	0.696983	1.82151	11	1.3625	4.12239	1.13235	5.07431	7.14708	257.543	121	2.12845
FM3A	0.93	2022	2022-07	0.223597	0.502887	0.236784	0.0461308	0.0507178	0.165917	0.169174	0.288862	0.492277	0.231766	0.946272	0.0496639	0.714092	0.700781	1.12923	11	3.17748	5.41505	2.54942	10.409	0.546303	300.498	121	2.48346
XS13	0.37	2021	2021-06	0.263403	0.0213318	0.509534	0.0970407	0.234235	0.193522	0.140866	0.103325	0.635643	0.125479	0.767452	0.616836	0.71406	0.66988	0.449261	12	1.2399	7.62772	1.50574	9.20943	7.40203	357.63	144	2.48354
XS13	0.37	2021	2021-04	0.115198	0.0636399	0.641793	0.0805253	0.234235	0.145744	0.140866	0.0857397	0.478714	0.617532	0.306233	0.441429	0.713899	0.66988	0.449243	12	1.02888	5.74457	7.41038	3.6748	5.29715	357.63	144	2.48354
QS31	2	2022	2022-06	0.228717	0.00325922	0.448693	0.106608	0.127668	0.196791	0.133124	0.123771	1	0.568285	0.509409	0.0571591	0.713381	0.69399	2.42803	11	1.36148	11	6.25113	5.6035	0.628751	295.485	121	2.44203
MB19	2.52	2022	2022-01	0.281569	0.304033	0.275601	0.0211724	0.0322193	0.0463039	0.0486278	0.0717836	0.246104	0.112981	0.291708	0	0.713176	0.52011	3.05916	21	1.50746	5.16818	2.3726	6.12586	0	986.285	441	2.23647
NC1B	2.32	2022	2022-11	0.23354	0.526906	0.18376	0.0770564	0.0730232	0.0528853	0.0524605	0.432891	0.338179	0.74755	0.178271	0.761167	0.712983	0.701672	2.81624	11	4.7618	3.71997	8.22305	1.96098	8.37283	250.726	121	2.07211
ER3A	2	2022	2022-06	0.42272	0.00876364	0.271579	0.0551448	0.0811518	0.161375	0.200114	0.157845	0.331863	0.413848	0.618992	0.304814	0.712946	0.716639	2.42777	9	1.42061	2.98676	3.72463	5.57093	2.74332	212.158	81	2.61923
EJ11	1.5	2022	2022-06	0.347761	0.010686	0.422367	0.0514541	0.0691882	0.287291	0.173798	0.0920289	0.610263	0.110415	0.780018	0.659566	0.71263	0.696983	1.82068	11	1.01232	6.71289	1.21456	8.5802	7.25522	257.543	121	2.12845
RU21	0.6	2022	2022-08	0.281578	0.0853244	0.35522	0.0103977	0.0324178	0.619784	0.526096	0.0998467	0.483464	0.701167	0.484973	0.371804	0.712567	0.688747	0.728262	11	1.09831	5.31811	7.71284	5.3347	4.08984	309.751	121	2.55992
FM3A	0.93	2022	2022-01	0.182001	0.5287	0.211106	0.0447278	0.0507178	0.167113	0.169174	0.266201	0.509491	0.815513	0.770982	0.560935	0.712562	0.700781	1.1288	11	2.92822	5.6044	8.97065	8.4808	6.17028	300.498	121	2.48346
GW1A	0.5	2021	2021-11	0.305357	0.196111	0.454592	0.0900506	0.103302	0.124169	0.112428	0.277282	0.523171	0.319507	0.253341	0.506484	0.712271	0.595493	0.606841	23	6.37749	12.0329	7.34866	5.82684	11.6491	1112.54	529	2.10311
FR4B	0.38	2021	2021-11	0.219159	0.155462	0.44142	0.072091	0.0996804	0.2676	0.305796	0.0985593	0.498529	0.649293	0.441076	0.20014	0.712249	0.712815	0.461196	12	1.18271	5.98235	7.79152	5.29292	2.40168	362.648	144	2.51839
FU23	0.54	2021	2021-06	0.286127	0	0.462886	0.113016	0.123106	0.24067	0.216492	0.374039	0.366487	0.315045	1	0.100092	0.711814	0.687481	0.655314	11	4.11443	4.03136	3.46549	11	1.10101	297.293	121	2.45697
IS15	0.37	2022	2022-04	0.217623	0.0121515	0.101562	0.583403	0.414086	0.217553	0.251744	0.968589	0.244964	0.450776	0.951726	1	0.711446	0.734902	0.44897	10	9.68589	2.44964	4.50776	9.51726	10	283.434	100	2.83434
RU25	0.3	2022	2022-05	0.160532	0.107017	0.5121	0.00771409	0.0311818	0.808129	0.518124	0.0409899	0.770107	0.683988	0.325018	0.442426	0.710911	0.681223	0.363982	11	0.450889	8.47117	7.52387	3.5752	4.86669	300.845	121	2.48632
MZ15	0.3	2021	2021-09	0.277916	0.033445	0.462994	0.0484462	0.0314271	0.135813	0.157096	0.473767	0.30733	0.76318	0.852004	0.173411	0.710836	0.691861	0.363975	11	5.21144	3.38063	8.39498	9.37205	1.90752	278.834	121	2.30441
KD19	2.42	2021	2021-07	0.20942	0.55221	0.250486	0.0198124	0.0503618	0.0172506	0.0174265	0.0733491	0.333951	0.38022	0.364295	0.0917276	0.710832	0.572877	2.93606	21	1.54033	7.01296	7.98463	7.6502	1.92628	1034.8	441	2.34649
DE15	1.2	2021	2021-11	0.326514	0.635601	0.198952	0	0.0215251	0.102072	0.071734	0	0.755221	0.072741	0.331897	0.58215	0.710596	0.695681	1.45581	10	0	7.55221	0.72741	3.31897	5.8215	197.775	100	1.97775
FU21	0.67	2021	2021-08	0.258454	0.0697972	0.350869	0.118757	0.0820816	0.232123	0.271951	0.557385	0.157282	0.650032	0.0433039	0.522604	0.710582	0.691853	0.812827	11	6.13123	1.7301	7.15035	0.476343	5.74865	301.693	121	2.49333
RU25	0.3	2022	2022-11	0.316542	0.0287347	0.406753	0.0148147	0.0311818	0.614685	0.518124	0.0990234	0.538328	0.217289	0.818764	0.672041	0.710131	0.681223	0.363912	11	1.08926	5.92161	2.39017	9.0064	7.39245	300.845	121	2.48632
GK39	0.92	2022	2022-08	0.229105	0.214734	0.317635	0.0859527	0.0873316	0.0627173	0.0642698	0.494303	0.43564	0.991884	0.275678	0.238315	0.710002	0.716715	1.11596	11	5.43733	4.79204	10.9107	3.03245	2.62147	302.689	121	2.50157
RU25	0.3	2022	2022-09	0.261168	0	0.400345	0.125053	0.0311818	0.333979	0.518124	1	0.201996	0.38294	1	0.686007	0.709999	0.681223	0.3639	11	11	2.22196	4.21234	11	7.54608	300.845	121	2.48632
BV39	0.31	2021	2021-04	0.273631	0.0572688	0.347802	0.273265	0.262158	0.144585	0.159376	0.258413	0.284591	0.353883	0.047609	0.465822	0.709744	0.458346	0.376006	23	5.9435	6.54559	8.1393	1.09501	10.7139	1196.68	529	2.26216
FM35	0.75	2022	2022-02	0.165689	0.60187	0.236442	0.0888414	0.0530347	0.0610986	0.14135	0.798812	0	0.800971	0.447859	0.389972	0.709556	0.712878	0.90965	9	7.1893	0	7.20874	4.03073	3.50975	200.73	81	2.47815
RU21	0.6	2022	2022-04	0.435323	0	0.203699	0.0725769	0.0324178	0.660221	0.526096	1	0.550507	0.315847	1	1	0.709459	0.688747	0.727703	11	11	6.05558	3.47432	11	11	309.751	121	2.55992
FF2A	2.77	2022	2022-09	0.217795	0.35965	0.179026	0.0409132	0.0645231	0.0759244	0.0759176	0.306932	0.412376	0	0.665704	1	0.709458	0.731777	3.35956	9	2.76239	3.71138	0	5.99133	9	191.312	81	2.36188
MB19	2.52	2022	2022-11	0.263498	0.316436	0.195805	0.0390219	0.0322193	0.052208	0.0486278	0.47717	0.353905	0.376046	0.210876	0.596808	0.709319	0.52011	3.05624	21	10.0206	7.432	7.89697	4.42839	12.533	986.285	441	2.23647
NR1B	0.6	2021	2021-06	0.322785	0.0813269	0.484633	0.0436493	0.0515262	0.312684	0.374652	0.250521	0.464017	0.585362	0.746534	0	0.709237	0.694285	0.727663	12	3.00626	5.5682	7.02435	8.95841	0	383.42	144	2.66264
FR29	1.35	2021	2021-09	0.216847	0.309651	0.208349	0.0351036	0.099568	0.220025	0.146592	0.0597714	0.285078	0.183278	0.405576	0.435498	0.70919	0.674634	1.63722	12	0.717256	3.42094	2.19934	4.86691	5.22598	246.003	144	1.70835
JV29	0.39	2021	2021-02	0.289447	0.139686	0.293997	0.0738185	0.145205	0.438344	0.330717	0.115922	0.788312	0.44543	0.191155	0.776119	0.70916	0.684766	0.472972	12	1.39106	9.45974	5.34516	2.29386	9.31343	393.117	144	2.72998
IB35	3.25	2021	2021-10	0.115532	0.329386	0.0933658	0.065268	0.076364	0.0380393	0.0320491	0.485773	0.520008	1	0.781713	0.802326	0.70904	0.735437	3.94131	10	4.85773	5.20008	10	7.81713	8.02326	301.986	100	3.01986
IB35	3.25	2021	2021-03	0.147014	0.350974	0.0757928	0.1024	0.076364	0.0238632	0.0320491	0.762138	0.204385	0.703962	0.710568	1	0.708931	0.735437	3.94121	10	7.62138	2.04385	7.03962	7.10568	10	301.986	100	3.01986
FM35	0.75	2022	2022-04	0.207914	0.57437	0.272766	0.0557807	0.0530347	0.101037	0.14135	0.491382	0.147457	0.519977	0.61356	0	0.708889	0.712878	0.9095	9	4.42244	1.32711	4.67979	5.52204	0	200.73	81	2.47815
FM35	0.75	2022	2022-03	0.135781	0.548896	0.234467	0.110477	0.0530347	0.0927456	0.14135	1	0.116843	1	0.767048	0.411177	0.70886	0.712878	0.909494	9	9	1.05159	9	6.90343	3.70059	200.73	81	2.47815
LL19	1.1	2022	2022-11	0.197553	0.0164389	0.36675	0.0754911	0.0864473	0.155497	0.0680684	0.200107	1	0.6591	0	0.398788	0.708719	0.687178	1.33388	11	2.20118	11	7.2501	0	4.38667	278.147	121	2.29874
LZ1B	0.3	2021	2021-05	0.470289	0.147369	0.311386	0.0835681	0.101848	0.0638984	0.116296	0.240419	0.21773	0	0.465717	0.66606	0.708418	0.680504	0.363758	12	2.88502	2.61276	0	5.5886	7.99272	362.611	144	2.51813
GD19	1.7	2022	2022-03	0.32911	0.368881	0.0984202	0.0322454	0.0538944	0.00843768	0.00651137	0.23951	0.497577	0.177948	0.023497	0.820253	0.70832	0.71975	2.06124	11	2.63461	5.47334	1.95743	0.258467	9.02278	328.788	121	2.71726
ES25	0.31	2022	2022-07	0.314571	0.0104556	0.422137	0.0739557	0.108724	0.215259	0.184974	0.368055	0.73378	0.135726	0.473394	0.213076	0.708231	0.493476	0.375866	22	8.09721	16.1432	2.98596	10.4147	4.68768	1295.21	484	2.67605
LC15	2.13	2022	2022-09	0.243735	0.181662	0.118987	0.0253453	0.0323338	0.0437851	0.0342939	0.276341	0.781375	0	0	0.832756	0.708219	0.72076	2.58255	11	3.03975	8.59512	0	0	9.16031	312.614	121	2.58359
FM3A	0.93	2022	2022-08	0.240112	0.60417	0.189054	0.0455042	0.0507178	0.189018	0.169174	0.27874	0.824842	0	0.258486	1	0.707925	0.700781	1.12751	11	3.06614	9.07326	0	2.84335	11	300.498	121	2.48346
FM3A	0.93	2022	2022-11	0.176967	0.642235	0.211884	0.0519635	0.0507178	0.176419	0.169174	0.383067	0.643465	0.88616	0	0.545441	0.707916	0.700781	1.12751	11	4.21374	7.07811	9.74776	0	5.99986	300.498	121	2.48346
DE15	1.2	2021	2021-09	0.274559	0.585428	0.244978	0.00519412	0.0215251	0.113254	0.071734	0.052148	0.866788	0.773302	0.607974	0.254409	0.707847	0.695681	1.45482	10	0.52148	8.66788	7.73302	6.07974	2.54409	197.775	100	1.97775
RU23	0.4	2022	2022-11	0.310876	0.02722	0.453145	0.0152169	0.0239766	0.470602	0.512717	0.148078	0.239827	0.573887	0.381386	0.38262	0.707055	0.695445	0.484847	11	1.62885	2.6381	6.31275	4.19524	4.20882	277.145	121	2.29045
CZ1A	0.15	2021	2021-08	0.36353	0.0190902	0.184517	0.34598	0.33091	0.283566	0.301052	0.460385	0.326557	0.0497908	0.821573	0.832831	0.707008	0.686816	0.181815	12	5.52462	3.91868	0.59749	9.85887	9.99398	367.124	144	2.54947
LZ1B	0.3	2021	2021-07	0.381329	0.195677	0.321866	0.0314205	0.101848	0.125507	0.116296	0.0192267	0.48918	0.321774	0.237499	0.633169	0.706828	0.680504	0.363615	12	0.23072	5.87016	3.86129	2.84998	7.59802	362.611	144	2.51813
GK19	1.25	2022	2022-04	0.220015	0.158875	0.313933	0.0556854	0.0537676	0.00179204	0.0379419	0.454325	0	0.549576	0.345196	0.372715	0.706805	0.739868	1.51505	11	4.99758	0	6.04534	3.79716	4.09987	271.369	121	2.24272
FF2A	2.77	2022	2022-11	0.159436	0.186369	0.279876	0.0529935	0.0645231	0.0559027	0.0759176	0.449531	0.280855	0.467281	1	0	0.706729	0.731777	3.35729	9	4.04578	2.5277	4.20553	9	0	191.312	81	2.36188
GU25	0.48	2022	2022-09	0.318704	0.306713	0.400238	0.109536	0.125924	0.121883	0.089466	0.137563	0.721889	0.645257	0	0.52239	0.706526	0.707923	0.58174	11	1.51319	7.94078	7.09783	0	5.74628	270.535	121	2.23583
GR15	0.54	2021	2021-11	0.317212	0.163668	0.294178	0.0788414	0.0524066	0.418826	0.497872	0.963809	0.230331	0.671867	0.097141	0.697263	0.706474	0.710284	0.654449	12	11.5657	2.76398	8.0624	1.16569	8.36716	376.036	144	2.61136
DC19	1.22	2022	2022-04	0.233046	0.248686	0.353075	0.179153	0.240549	0.193416	0.155263	0.338247	0.830681	0.992115	0.480882	0.132683	0.706397	0.749675	1.47854	11	3.72071	9.13749	10.9133	5.2897	1.45951	332.837	121	2.75072
BR25	0.2	2021	2021-11	0.334584	0.0215211	0.412842	0.151606	0.173356	0.127148	0.188717	0.312093	0.157493	0.103083	0.418751	0.483939	0.706346	0.520874	0.242381	23	7.17813	3.62233	2.37091	9.63126	11.1306	1199.12	529	2.26677
QS31	2	2022	2022-05	0.330575	0	0.317471	0.117892	0.127668	0.173859	0.133124	0.194389	0.841075	0	1	0.522872	0.706298	0.69399	2.42378	11	2.13828	9.25182	0	11	5.7516	295.485	121	2.44203
NE19	1.16	2022	2022-04	0.256062	0.375872	0.248496	0.0932115	0.0773797	0.0694271	0.0408401	0.896099	1	0.776457	1	0	0.706246	0.742769	1.40577	11	9.85709	11	8.54103	11	0	331.604	121	2.74053
GK2B	0.89	2022	2022-08	0.272431	0.263406	0.350685	0.115731	0.124827	0.0882862	0.0880246	0.410038	0.608956	0.903381	0	0.231777	0.706197	0.735022	1.07855	11	4.51042	6.69852	9.93719	0	2.54955	323.041	121	2.66976
RU25	0.3	2022	2022-03	0.292564	0	0.40021	0.0321603	0.0311818	0.556835	0.518124	0.240789	0.469015	0.289019	1	0.686301	0.705958	0.681223	0.363536	11	2.64868	5.15916	3.1792	11	7.54931	300.845	121	2.48632
GK39	0.92	2022	2022-11	0.253757	0.211446	0.327352	0.0732966	0.0873316	0.0685977	0.0642698	0.0941053	0.628806	0.673693	0.343602	0.0561507	0.70584	0.716715	1.11481	11	1.03516	6.91686	7.41063	3.77962	0.617658	302.689	121	2.50157
IG13	1.2	2022	2022-04	0.212339	0.279193	0.270656	0.121169	0.252028	0.055741	0.0668449	0.125611	0.350032	0.613396	0.570624	0.175387	0.705818	0.697405	1.45409	11	1.38172	3.85035	6.74736	6.27686	1.92926	303.308	121	2.50668
RU23	0.4	2022	2022-07	0.39947	0.00831296	0.400406	0.0335782	0.0239766	0.409462	0.512717	0.532211	0.0575967	0.0889995	0.811076	0.602089	0.705749	0.695445	0.48469	11	5.85432	0.633564	0.978994	8.92183	6.62298	277.145	121	2.29045
NC1B	2.32	2022	2022-09	0.255078	0.527319	0.192131	0.0602846	0.0730232	0.0491332	0.0524605	0.136649	0.268315	0.397246	0.174947	0.552876	0.705737	0.701672	2.81119	11	1.50313	2.95146	4.36971	1.92441	6.08164	250.726	121	2.07211
IB31	3.97	2021	2021-09	0.233062	0.269358	0.14474	0.0692884	0.0491185	0.0521233	0.0325697	0.616442	0.61377	0	0	0	0.705691	0.443638	4.81048	21	12.9453	12.8892	0	0	0	1143.05	441	2.59196
GK21	1.35	2022	2022-01	0.336309	0.159857	0.296268	0.0978812	0.123622	0.0852846	0.0734933	0.0610673	0.811691	0.293281	1	0.274661	0.705647	0.743348	1.63579	10	0.610673	8.11691	2.93281	10	2.74661	249.95	100	2.4995
RU23	0.4	2022	2022-02	0.360682	0.0304981	0.36416	0.00813888	0.0239766	0.610898	0.512717	0	0.657987	0.301293	0.306885	0.752925	0.705512	0.695445	0.484661	11	0	7.23786	3.31422	3.37574	8.28217	277.145	121	2.29045
GU25	0.48	2022	2022-03	0.345455	0.209106	0.469672	0.0951103	0.125924	0.0776103	0.089466	0.0267895	0.408752	0.526141	0.524776	0.273958	0.705444	0.707923	0.581584	11	0.294684	4.49628	5.78755	5.77253	3.01354	270.535	121	2.23583
ER3A	2	2022	2022-11	0.431438	0.000572975	0.278907	0.0391956	0.0811518	0.334398	0.200114	0	1	0.356088	0.975089	0.276543	0.705313	0.716639	2.42319	9	0	9	3.20479	8.7758	2.48889	212.158	81	2.61923
GR15	0.54	2021	2021-01	0.335988	0.101924	0.365286	0.0144789	0.0524066	0.533861	0.497872	0	0.59729	0.61927	0.437748	0.333711	0.705207	0.710284	0.654244	12	0	7.16747	7.43124	5.25297	4.00453	376.036	144	2.61136
BU21	0.95	2022	2022-05	0.183546	0	0.22885	0.51934	0.449641	0.121876	0.182268	0.424123	0.197003	0.324731	1	0.548729	0.705147	0.700506	1.15097	11	4.66536	2.16703	3.57204	11	6.03602	296.05	121	2.44669
DE15	1.2	2021	2021-05	0.31527	0.657745	0.209642	0.0224634	0.0215251	0.0435507	0.071734	0.225528	0.171343	0.224363	0.210046	0.506027	0.705023	0.695681	1.45381	10	2.25528	1.71343	2.24363	2.10046	5.06027	197.775	100	1.97775
HS13	1.25	2021	2021-05	0.39747	0.00160444	0.377635	0.0952132	0.0796169	0.155649	0.213053	0.664733	0.296835	0.639168	0.970275	0	0.704442	0.715027	1.51417	11	7.31207	3.26519	7.03085	10.673	0	307.367	121	2.54023
GU25	0.48	2022	2022-05	0.338895	0.291227	0.417986	0.106068	0.125924	0.077081	0.089466	0.110935	0.405009	0.555352	0.0832617	0.458886	0.704418	0.707923	0.581436	11	1.22028	4.45509	6.10887	0.915879	5.04775	270.535	121	2.23583
BZ13	0.68	2021	2021-05	0.245964	0.0327135	0.301759	0.337734	0.480774	0.214625	0.194567	0.0756219	0.624084	0.0953231	0.209832	0.329449	0.704383	0.477125	0.823694	23	1.7393	14.3539	2.19243	4.82615	7.57732	1327.2	529	2.50888
RU21	0.6	2022	2022-07	0.466254	0	0.286004	0.0676688	0.0324178	0.409416	0.526096	0.928946	0.134681	0.238326	1	0.658769	0.703834	0.688747	0.72669	11	10.2184	1.48149	2.62159	11	7.24646	309.751	121	2.55992
CB39	0.84	2022	2022-08	0.118789	0.94746	0.208303	0.020113	0.01971	0.017605	0.0396785	0.175283	0.105779	0.37243	0.113777	0.330164	0.703413	0.518513	1.01726	21	3.68095	2.22136	7.82104	2.38932	6.93345	911.358	441	2.06657
RU23	0.4	2022	2022-10	0.306723	0.0287395	0.482096	0.0297622	0.0239766	0.392166	0.512717	0.452378	0.00604327	0.596614	0.346854	0.262143	0.703331	0.695445	0.4844	11	4.97616	0.0664759	6.56275	3.81539	2.88357	277.145	121	2.29045
BD1B	4.55	2022	2022-11	0.134558	0.0943995	0.175308	0.188702	0.204551	0.0772343	0.0840451	0.276411	0.526244	1	0.837776	0.718449	0.703324	0.724348	5.51004	9	2.4877	4.73619	9	7.53998	6.46604	204.398	81	2.52343
GJ1B	1.05	2022	2022-08	0.257347	0.199784	0.290863	0.139779	0.109293	0.0747106	0.0559709	0.949737	0.940426	1	0.0922503	0.0543512	0.70292	0.730571	1.27142	11	10.4471	10.3447	11	1.01475	0.597864	311.943	121	2.57804
IS15	0.37	2022	2022-09	0.308164	0.0762839	0.199228	0.173263	0.414086	0.253489	0.251744	0.0826252	0.420011	0	0.696951	0.629059	0.702898	0.734902	0.448022	10	0.826252	4.20011	0	6.96951	6.29059	283.434	100	2.83434
HS13	1.25	2021	2021-09	0.50863	0	0.232565	0.12148	0.0796169	0.245114	0.213053	0.868257	0.471126	0	1	0.952664	0.702815	0.715027	1.51356	11	9.55083	5.18238	0	11	10.4793	307.367	121	2.54023
RE15	0.8	2022	2022-08	0.614201	0	0.238731	0.0152145	0.0164811	0.398635	0.423205	0.445827	0.298207	0	1	0.667049	0.702717	0.714261	0.968652	11	4.9041	3.28027	0	11	7.33754	313.253	121	2.58887
GK2B	0.89	2022	2022-09	0.281357	0.241389	0.358357	0.104042	0.124827	0.100008	0.0880246	0.153148	0.949552	0.805609	0.250625	0.141852	0.702689	0.735022	1.07762	11	1.68463	10.4451	8.8617	2.75687	1.56037	323.041	121	2.66976
HZ13	0.62	2021	2021-11	0.306272	0.0868306	0.483507	0.0796401	0.224733	0.141162	0.156183	0.120689	0.403712	0.133411	0	0.458049	0.702408	0.4508	0.750648	23	2.77585	9.28538	3.06845	0	10.5351	1494.59	529	2.82532
GU25	0.48	2022	2022-04	0.382189	0.274857	0.370672	0.0916216	0.125924	0.161203	0.089466	0	1	0.362572	0.171272	0.628175	0.702291	0.707923	0.58113	11	0	11	3.98829	1.884	6.90993	270.535	121	2.23583
BR23	0.61	2021	2021-05	0.313391	0.034305	0.460024	0.108811	0.136941	0.166753	0.177379	0.0640838	0.330448	0.337742	0.179545	0.401684	0.702159	0.542907	0.738495	23	1.47393	7.60031	7.76806	4.12954	9.23872	1127.41	529	2.1312
FM19	4.58	2022	2022-11	0.157971	0.558055	0.107819	0.0113793	0.0274879	0.0858127	0.0679673	0	0.825541	0.0419661	0.720041	0.611383	0.701943	0.727429	5.54447	11	0	9.08095	0.461628	7.92045	6.72521	336.768	121	2.78321
FF31	3.15	2022	2022-01	0.151414	0.322055	0.106656	0.0267235	0.0404363	0.0217461	0.0325161	0.163996	0.411469	0.463961	0.212172	0.863382	0.701878	0.73711	3.81327	11	1.80396	4.52616	5.10357	2.33389	9.4972	320.42	121	2.6481
RU23	0.4	2022	2022-08	0.415732	0.0111991	0.35059	0.0216128	0.0239766	0.49273	0.512717	0.281885	0.305781	0	0.745485	0.809394	0.701759	0.695445	0.484211	11	3.10074	3.3636	0	8.20033	8.90333	277.145	121	2.29045
GU25	0.48	2022	2022-10	0.260286	0.280157	0.435707	0.117933	0.125924	0.135547	0.089466	0.202044	0.818538	0.905382	0.142777	0.395482	0.701753	0.707923	0.581052	11	2.22249	9.00391	9.9592	1.57055	4.35031	270.535	121	2.23583
LC1A	2.6	2022	2022-10	0.167351	0.142598	0.100975	0.0200721	0.0207284	0.0218656	0.0272528	0.534054	0.244993	0.888315	0.455017	0.746119	0.701675	0.736173	3.14731	11	5.87459	2.69493	9.77147	5.00518	8.20731	330.682	121	2.73291
XS13	0.37	2021	2021-08	0.234471	0.091731	0.376697	0.249101	0.234235	0.103117	0.140866	0.265232	0.338701	0.221537	0	0.793008	0.701458	0.66988	0.447862	12	3.18278	4.06441	2.65845	0	9.5161	357.63	144	2.48354
IG13	1.2	2022	2022-06	0.280618	0.348789	0.231809	0.107198	0.252028	0.0302136	0.0668449	0.0988251	0.174051	0.236274	0.40549	0.421456	0.701435	0.697405	1.45252	11	1.08708	1.91456	2.59902	4.46039	4.63601	303.308	121	2.50668
QS31	2	2022	2022-08	0.319725	0.00122339	0.236885	0.107263	0.127668	0.177588	0.133124	0.12787	0.866918	0.0605308	0.81585	0.808876	0.701413	0.69399	2.42085	11	1.40657	9.5361	0.665838	8.97435	8.89763	295.485	121	2.44203
IH1B	0.84	2022	2022-08	0.166374	0.0350232	0.104811	0.689387	0.410856	0.167307	0.095611	0.968718	0.918852	0.742025	0.902279	0.96784	0.701405	0.693372	1.01675	11	10.6559	10.1074	8.16228	9.92507	10.6462	357.033	121	2.95068
FM19	4.58	2022	2022-02	0.159893	0.491756	0.147322	0.0220047	0.0274879	0.100493	0.0679673	0.335812	1	0	1	0	0.701282	0.727429	5.54356	11	3.69393	11	0	11	0	336.768	121	2.78321
BZ13	0.68	2021	2021-03	0.226628	0.0228681	0.245631	0.461013	0.480774	0.177027	0.194567	0.33681	0.395526	0.201203	0.447641	0.53691	0.701054	0.477125	0.823015	23	7.74662	9.09711	4.62768	10.2957	12.3489	1327.2	529	2.50888
FM19	4.58	2022	2022-01	0.114086	0.516982	0.109415	0.0334364	0.0274879	0.0605002	0.0679673	0.697106	0.524741	1	0.893479	0.586683	0.700651	0.727429	5.54269	11	7.66816	5.77215	11	9.82827	6.45351	336.768	121	2.78321
LL19	1.1	2022	2022-08	0.228666	0.00110224	0.327115	0.111735	0.0864473	0.0698567	0.0680684	0.696503	0.320528	0.389403	0.932949	0.99199	0.700583	0.687178	1.33119	11	7.66153	3.52581	4.28343	10.2624	10.9119	278.147	121	2.29874
DE15	1.2	2021	2021-03	0.308424	0.695917	0.22029	0	0.0215251	0.126605	0.071734	0	1	0.316663	0	0.430205	0.700482	0.695681	1.45217	10	0	10	3.16663	0	4.30205	197.775	100	1.97775
CB19	1.06	2022	2022-10	0.611927	0.272683	0.177278	0.0497717	0.0885956	0.0962916	0.132923	0.0669317	0.167277	0.0642015	0.324547	0.400653	0.700314	0.582083	1.2827	21	1.40557	3.51282	1.34823	6.81548	8.41371	962.807	441	2.18324
IC29	6	2022	2022-06	0.166045	0.296135	0.167004	0.0519874	0.0519153	0.0244815	0.024206	0.332771	0.371496	0.553447	0.101909	0	0.700208	0.439962	7.26037	21	6.9882	7.80142	11.6224	2.14009	0	1111.11	441	2.51953
GU25	0.48	2022	2022-11	0.435871	0.237062	0.309558	0.117918	0.125924	0.056292	0.089466	0.20193	0.257969	0.123537	0.374471	0.84684	0.700131	0.707923	0.580819	11	2.22123	2.83766	1.3589	4.11919	9.31524	270.535	121	2.23583
FR29	1.35	2021	2021-02	0.13133	0	0.189611	0.471542	0.099568	0.687226	0.146592	1	1	0.6381	1	0.502229	0.700096	0.674634	1.63354	12	12	12	7.65719	12	6.02674	246.003	144	1.70835
CB19	1.06	2022	2022-06	0.565325	0.297453	0.17318	0.07418	0.0885956	0.116684	0.132923	0.22239	0.332539	0.478194	0.17559	0.481149	0.6998	0.582083	1.28254	21	4.67018	6.98332	10.0421	3.68739	10.1041	962.807	441	2.18324
BD1B	4.55	2022	2022-06	0.167885	0.553502	0.286337	0.189741	0.204551	0.0763428	0.0840451	0.281488	0.519755	0.761176	0.0488148	0	0.699512	0.724348	5.50483	9	2.53339	4.67779	6.85058	0.439333	0	204.398	81	2.52343
FZ13	0.57	2022	2022-07	0.307467	0.015279	0.451137	0.0957338	0.087523	0.105926	0.153003	0.321386	0.132951	0.655283	0.701095	0.527444	0.699508	0.664246	0.689616	11	3.53525	1.46246	7.20812	7.71204	5.80189	296.868	121	2.45346
DE15	1.2	2021	2021-12	0.331909	0.590935	0.203206	0	0.0215251	0.0716227	0.071734	0	0.451424	0	0.577671	0.551853	0.699327	0.695681	1.45176	10	0	4.51424	0	5.77671	5.51853	197.775	100	1.97775
FR41	0.75	2021	2021-05	0.279365	0.0842729	0.42148	0.0715822	0.133241	0.394369	0.257391	0.0386796	0.914304	0.426525	0.800144	0.335356	0.699272	0.691114	0.907336	12	0.464155	10.9716	5.1183	9.60172	4.02428	387.709	144	2.69243
EJ11	1.5	2022	2022-02	0.269678	0.0038133	0.376731	0.0751963	0.0691882	0.457808	0.173798	0.295233	1	0.64321	0.938438	0.775829	0.698986	0.696983	1.81454	11	3.24756	11	7.07531	10.3228	8.53412	257.543	121	2.12845
NR1B	0.6	2021	2021-09	0.290364	0.225678	0.275303	0.0253911	0.0515262	0.414743	0.374652	0.102379	0.68658	0.700274	0.296644	0.704055	0.69896	0.694285	0.725813	12	1.22854	8.23895	8.40328	3.55973	8.44866	383.42	144	2.66264
FM3A	0.93	2022	2022-10	0.177529	0.623989	0.237342	0.0444968	0.0507178	0.186129	0.169174	0.262469	0.783244	0.878274	0.123902	0.0385531	0.698945	0.700781	1.12501	11	2.88716	8.61568	9.66102	1.36293	0.424084	300.498	121	2.48346
FR4B	0.38	2021	2021-03	0.242023	0.226416	0.3862	0.0661611	0.0996804	0.272989	0.305796	0.0492014	0.521408	0.50272	0	0.478808	0.698928	0.712815	0.459678	12	0.590416	6.2569	6.03264	0	5.74569	362.648	144	2.51839
GU23	0.6	2021	2021-09	0.424639	0.157765	0.380736	0.0403799	0.11158	0.146291	0.105488	0	0.737814	0	0.473391	0.694331	0.698901	0.703572	0.725802	12	0	8.85377	0	5.68069	8.33197	347.226	144	2.41129
FM3A	0.93	2022	2022-06	0.228501	0.534643	0.207154	0.0282462	0.0507178	0.201185	0.169174	0	1	0.162949	0.730624	0.639622	0.698856	0.700781	1.12498	11	0	11	1.79244	8.03687	7.03584	300.498	121	2.48346
GK39	0.92	2022	2022-07	0.232174	0.228078	0.326414	0.0881835	0.0873316	0.0647176	0.0642698	0.564845	0.501348	0.952271	0	0.0737368	0.698798	0.716715	1.11287	11	6.2133	5.51483	10.475	0	0.811105	302.689	121	2.50157
FR4B	0.38	2021	2021-10	0.214831	0.192189	0.425528	0.0663953	0.0996804	0.259063	0.305796	0.0511507	0.462281	0.677041	0.212766	0.28034	0.698439	0.712815	0.459622	12	0.613808	5.54737	8.12449	2.55319	3.36409	362.648	144	2.51839
GD19	1.7	2022	2022-05	0.317429	0.350051	0.0902221	0.0498045	0.0538944	0.000332457	0.00651137	0.554498	0.0196053	0.265525	0.442604	0.886438	0.69843	0.71975	2.0562	11	6.09948	0.215658	2.92078	4.86864	9.75082	328.788	121	2.71726
FN2B	1.16	2022	2022-06	0.25409	0.164972	0.225828	0.0268191	0.0378349	0.0291685	0.065923	0.153115	0.153056	0	0.391537	0.468977	0.698293	0.703258	1.40301	11	1.68427	1.68362	0	4.3069	5.15875	272.949	121	2.25578
BZ13	0.68	2021	2021-01	0.24408	0.0334504	0.281117	0.362824	0.480774	0.219432	0.194567	0.12878	0.653302	0.105639	0.192033	0.405745	0.698177	0.477125	0.822428	23	2.96194	15.026	2.42971	4.41676	9.33214	1327.2	529	2.50888
JJ13	0.65	2022	2022-06	0.332676	0.358904	0.265441	0.0658454	0.0869597	0.00848499	0.0531155	0.327122	0.0379329	0.524022	0.206096	0.245663	0.698129	0.702818	0.786135	11	3.59834	0.417262	5.76424	2.26705	2.70229	249.854	121	2.06491
GK19	1.25	2022	2022-02	0.311	0.143096	0.154281	0.0347774	0.0537676	0.0341628	0.0379419	0.275352	0.388825	0	0.45097	1	0.697751	0.739868	1.51166	11	3.02888	4.27707	0	4.96067	11	271.369	121	2.24272
LD19	1.92	2022	2022-09	0.313106	0.377402	0.181422	0.030081	0.0314576	0.0501743	0.0520886	0.378937	0.245883	0.36441	0.219433	0.604784	0.697705	0.628429	2.32188	21	7.95768	5.16355	7.65262	4.60809	12.7005	854.077	441	1.93668
EB19	6.81	2021	2021-07	0.157454	0.336639	0.113112	0.0389139	0.0284104	0.0115816	0.0134939	0.751515	0.300889	0.0224866	0.460929	0	0.697687	0.555324	8.23537	21	15.7818	6.31868	0.472219	9.67951	0	1040.63	441	2.35969
EV1A	0.38	2021	2021-09	0.311927	0.00357393	0.392679	0.0906623	0.0861792	0.303697	0.175046	0.529593	1	0.383853	0.971712	0.835408	0.697478	0.702932	0.459513	12	6.35512	12	4.60623	11.6605	10.0249	429.749	144	2.98437
RE11	1.12	2022	2022-03	0.408204	0.0499136	0.269317	0.0401441	0.0426106	0.567659	0.461528	0.309076	1	1	0.228257	0.2489	0.697467	0.721784	1.35435	11	3.39983	11	11	2.51083	2.73791	319.765	121	2.64268
RS11	4	2021	2021-09	0.233109	0.00135795	0.358179	0.130758	0.110087	0.228293	0.144228	0.58207	1	0.821644	0.903337	0.188877	0.697221	0.688038	4.83666	12	6.98484	12	9.85972	10.84	2.26652	394.095	144	2.73677
RE11	1.12	2022	2022-05	0.527637	0	0.256126	0.0224956	0.0426106	0.52011	0.461528	0.0690371	0.833365	0.379532	1	0.358359	0.697165	0.721784	1.35425	11	0.759408	9.16702	4.17485	11	3.94195	319.765	121	2.64268
IB35	3.25	2021	2021-06	0.16397	0.30592	0.087806	0.0289841	0.076364	0.0313553	0.0320491	0.215721	0.371191	0.544511	0.859047	0.864867	0.697135	0.735437	3.92971	10	2.15721	3.71191	5.44511	8.59047	8.64867	301.986	100	3.01986
DE15	1.2	2021	2021-04	0.323502	0.647182	0.203105	0.0207063	0.0215251	0.0372956	0.071734	0.207888	0.108934	0.113356	0.268172	0.552576	0.697135	0.695681	1.45097	10	2.07888	1.08934	1.13356	2.68172	5.52576	197.775	100	1.97775
RU23	0.4	2022	2022-01	0.350142	0	0.349139	0.0181703	0.0239766	0.665428	0.512717	0.209867	0.820517	0.358976	1	0.815434	0.696859	0.695445	0.483623	11	2.30853	9.02569	3.94874	11	8.96977	277.145	121	2.29045
GK21	1.35	2022	2022-10	0.365909	0.189057	0.263304	0.093979	0.123622	0.0569143	0.0734933	0	0.376491	0	0.500686	0.478899	0.696784	0.743348	1.6322	10	0	3.76491	0	5.00686	4.78899	249.95	100	2.4995
ER1B	0.61	2022	2022-05	0.323144	0.0510332	0.439394	0.0428203	0.0506164	0.461617	0.577781	0.310109	0.271937	0.514618	0	0.17439	0.696649	0.460659	0.737487	23	7.1325	6.25455	11.8362	0	4.01097	1399.02	529	2.64464
DT1A	0.4	2021	2021-08	0.420436	0.108211	0.383708	0	0.10346	0.246843	0.190194	0	0.682169	0	0.294528	0.725309	0.696563	0.641072	0.483588	12	0	8.18602	0	3.53434	8.70371	401.159	144	2.78583
KD19	2.42	2021	2021-06	0.208023	0.602873	0.225589	0.0359252	0.0503618	0.0107225	0.0174265	0.344952	0.177884	0.391594	0	0.47722	0.696531	0.572877	2.92568	21	7.24399	3.73556	8.22347	0	10.0216	1034.8	441	2.34649
IH1B	0.84	2022	2022-10	0.124468	0.0639912	0.125948	0.650108	0.410856	0.182083	0.095611	0.908903	1	0.878434	0.821453	0.906059	0.696298	0.693372	1.01547	11	9.99793	11	9.66277	9.03598	9.96664	357.033	121	2.95068
FM29	3.92	2022	2022-05	0.200885	0.432535	0.130635	0.0188461	0.0249894	0.0683569	0.08127	0.265373	0.214164	0	0.721482	0	0.696057	0.713209	4.73856	11	2.9191	2.3558	0	7.9363	0	315.309	121	2.60586
RC19	4.5	2022	2022-10	0.686243	0.0324418	0.239716	0.00549317	0.00941406	0.0728494	0.116275	0.240127	0.127625	0.65422	0.545865	0.216751	0.695913	0.673693	5.43948	11	2.6414	1.40387	7.19642	6.00452	2.38426	309.115	121	2.55467
XS13	0.37	2021	2021-05	0.213668	0	0.473427	0.221792	0.234235	0.169042	0.140866	0.236154	0.555239	0.290605	1	0.664722	0.695912	0.66988	0.447246	12	2.83385	6.66286	3.48726	12	7.97667	357.63	144	2.48354
GU21	0.75	2021	2021-11	0.345158	0.175418	0.289334	0.0755284	0.106704	0.130372	0.0950602	0.29584	0.363728	0.272883	0.235413	1	0.695828	0.690131	0.906561	12	3.55008	4.36474	3.2746	2.82496	12	318.674	144	2.21302
RC19	4.5	2022	2022-04	0.857188	0.00458391	0.0929228	0.0107918	0.00941406	0.074432	0.116275	0.614959	0.130844	0.297779	0.935832	0.813576	0.695722	0.673693	5.43922	11	6.76455	1.43928	3.27557	10.2942	8.94934	309.115	121	2.55467
GK19	1.25	2022	2022-03	0.228271	0.13399	0.408794	0.0166121	0.0537676	0.0242202	0.0379419	0.119858	0.269398	0.499708	0.51201	0	0.695577	0.739868	1.51084	11	1.31844	2.96338	5.49678	5.63211	0	271.369	121	2.24272
ET1B	0.69	2021	2021-07	0.162569	0.0541866	0.59972	0.107947	0.145489	0.243996	0.182972	0.109239	0.525772	0.615949	0	0.0946657	0.695474	0.657358	0.833963	12	1.31087	6.30927	7.39139	0	1.13599	272.691	144	1.89369
KT11	0.67	2021	2021-04	0.277052	0.115906	0.370359	0.14202	0.109662	0.282227	0.293975	0.962024	0.474671	0.83791	0.18138	0.850231	0.695462	0.684715	0.809788	12	11.5443	5.69605	10.0549	2.17655	10.2028	424.379	144	2.94707
BZ13	0.68	2021	2021-08	0.263373	0.0414007	0.254406	0.402359	0.480774	0.152327	0.194567	0.212542	0.24538	0	0	0.504475	0.695394	0.477125	0.82186	23	4.88846	5.64375	0	0	11.6029	1327.2	529	2.50888
RC19	4.5	2022	2022-07	0.869831	0.00158301	0.0703566	0.0154239	0.00941406	0.128193	0.116275	0.942639	0.240185	0.271418	0.97784	0.905325	0.695271	0.673693	5.43862	11	10.369	2.64204	2.98559	10.7562	9.95857	309.115	121	2.55467
LC15	2.13	2022	2022-04	0.182871	0.111006	0.165024	0.0254656	0.0323338	0.0241146	0.0342939	0.278802	0.193032	0.61922	0.766638	0.642233	0.695097	0.72076	2.57417	11	3.06682	2.12335	6.81142	8.43301	7.06456	312.614	121	2.58359
GU21	0.75	2021	2021-06	0.338662	0.190315	0.342031	0.0969798	0.106704	0.0487904	0.0950602	0.396287	0.0973026	0.311043	0.170481	0.833846	0.695056	0.690131	0.906388	12	4.75545	1.16763	3.73251	2.04577	10.0061	318.674	144	2.21302
GU23	0.6	2021	2021-02	0.268837	0.198826	0.475191	0.0717668	0.11158	0.0867538	0.105488	0.195281	0.347559	0.836711	0.336332	0.263921	0.695054	0.703572	0.72511	12	2.34338	4.17071	10.0405	4.03599	3.16705	347.226	144	2.41129
CZ1A	0.15	2021	2021-11	0.370821	0.016167	0.165344	0.302686	0.33091	0.355632	0.301052	0.344697	0.731131	0.0168012	0.848895	0.919734	0.694863	0.686816	0.181269	12	4.13637	8.77357	0.201614	10.1867	11.0368	367.124	144	2.54947
NR1B	0.6	2021	2021-11	0.291718	0.141181	0.350506	0.020392	0.0515262	0.54508	0.374652	0.0618169	0.970811	0.695475	0.559991	0.451122	0.694855	0.694285	0.725074	12	0.741803	11.6497	8.3457	6.71989	5.41346	383.42	144	2.66264
GV11	0.99	2021	2021-08	0.420713	0.095434	0.414027	0.0209364	0.0901187	0.0446201	0.0743726	0	0.326131	0.386162	0.520144	0.634421	0.694839	0.7482	1.19637	11	0	3.58745	4.24778	5.72159	6.97864	336.008	121	2.77692
GK19	1.25	2022	2022-01	0.246696	0.210369	0.28187	0.00260997	0.0537676	0.0415619	0.0379419	0	0.477701	0.388411	0	0.498695	0.694728	0.739868	1.51052	11	0	5.25471	4.27252	0	5.48564	271.369	121	2.24272
BD1B	4.55	2022	2022-01	0.274105	0.490522	0.226105	0.227385	0.204551	0.00493471	0.0840451	0.465374	0	0	0.157044	0.389752	0.694705	0.724348	5.49827	9	4.18836	0	0	1.41339	3.50776	204.398	81	2.52343
HS31	0.7	2021	2021-06	0.328222	0.0330839	0.425401	0.0815483	0.0573934	0.242726	0.280564	0.797143	0.219391	0.898153	0.446498	0.0341895	0.694698	0.698924	0.845886	12	9.56571	2.6327	10.7778	5.35797	0.410274	339.832	144	2.35994
RE11	1.12	2022	2022-02	0.42276	0.022229	0.299313	0.0387776	0.0426106	0.543405	0.461528	0.290489	0.915003	0.924381	0.656304	0	0.694603	0.721784	1.35339	11	3.19538	10.065	10.1682	7.21935	0	319.765	121	2.64268
ET1B	0.69	2021	2021-12	0.290726	0	0.455408	0.200872	0.145489	0.182008	0.182972	0.203277	0.381476	0.242748	1	0.335712	0.694596	0.657358	0.833781	12	2.43932	4.57772	2.91297	12	4.02854	272.691	144	1.89369
JJ13	0.65	2022	2022-07	0.261485	0.420377	0.303536	0.0610226	0.0869597	0.0928711	0.0531155	0.296322	0.415189	0.748809	0	0	0.69454	0.702818	0.785435	11	3.25954	4.56708	8.2369	0	0	249.854	121	2.06491
GK21	1.35	2022	2022-09	0.268723	0.218337	0.340597	0.116405	0.123622	0.0904876	0.0734933	0.350964	0.891506	0.962951	0	0	0.694514	0.743348	1.63128	10	3.50964	8.91506	9.62951	0	0	249.95	100	2.4995
CS1A	0.65	2021	2021-05	0.328489	0.0388008	0.281427	0.297447	0.356348	0.216091	0.235995	0.302182	0.241056	0.390581	0.529686	0.258643	0.694465	0.470383	0.785421	23	6.95019	5.54429	8.98335	12.1828	5.94879	1297.54	529	2.45282
JJ13	0.65	2022	2022-01	0.236923	0.26563	0.279654	0.0983271	0.0869597	0.0162234	0.0531155	0.534561	0.0725283	0.826364	0.518806	0.154004	0.694332	0.702818	0.785395	11	5.88017	0.797812	9.09	5.70686	1.69405	249.854	121	2.06491
EV1A	0.38	2021	2021-06	0.436559	0.0180344	0.303356	0.112861	0.0861792	0.264988	0.175046	0.721866	0.872543	0	0.857258	1	0.694318	0.702932	0.459152	12	8.6624	10.4705	0	10.2871	12	429.749	144	2.98437
HS31	0.7	2021	2021-03	0.33935	0.036042	0.375445	0.051125	0.0573934	0.21834	0.280564	0.416726	0.117365	0.82202	0.397009	0.399571	0.694226	0.698924	0.845787	12	5.00072	1.40838	9.86424	4.76411	4.79485	339.832	144	2.35994
FR29	1.35	2021	2021-11	0.145538	0.36787	0.220656	0.0528387	0.099568	0.152044	0.146592	0.0979784	0.181052	0.562534	0.293815	0.39167	0.69417	0.674634	1.63114	12	1.17574	2.17263	6.75041	3.52578	4.70004	246.003	144	1.70835
RC19	4.5	2022	2022-09	0.75218	0.000622322	0.25	0.0102107	0.00941406	0.0633413	0.116275	0.573852	0.108287	0.516733	0.991288	0.174941	0.693978	0.673693	5.43687	11	6.31237	1.19116	5.68406	10.9042	1.92435	309.115	121	2.55467
LC1A	2.6	2022	2022-02	0.190644	0.119533	0.145476	0.0157173	0.0207284	0.024713	0.0272528	0.201902	0.411753	0.584896	0.889932	0.0348596	0.693861	0.736173	3.14121	11	2.22092	4.52928	6.43385	9.78926	0.383456	330.682	121	2.73291
RE15	0.8	2022	2022-01	0.391142	0.153728	0.169048	0.0286434	0.0164811	0.669839	0.423205	1	1	0.761961	0	1	0.69383	0.714261	0.966519	11	11	11	8.38157	0	11	313.253	121	2.58887
IG13	1.2	2022	2022-03	0.241214	0.519681	0.229981	0.150117	0.252028	0.0303616	0.0668449	0.181108	0.175072	0.453914	0	0.433031	0.693547	0.697405	1.44968	11	1.99219	1.92579	4.99305	0	4.76334	303.308	121	2.50668
IF1A	3.2	2022	2022-06	0.186325	0.388607	0.208384	0.0325281	0.0504381	0.0384437	0.063177	0.188412	0.180651	0.403637	0	0	0.693454	0.449691	3.86572	21	3.95664	3.79367	8.47638	0	0	1201.91	441	2.72543
DC19	1.22	2022	2022-01	0.270876	0.436331	0.277453	0.102297	0.240549	0.19473	0.155263	0	0.840967	0.47172	0	0.653735	0.693451	0.749675	1.4738	11	0	9.25064	5.18892	0	7.19108	332.837	121	2.75072
IG15	0.76	2021	2021-08	0.348432	0.51262	0.243493	0.0169258	0.108034	0.0129553	0.0403671	0.035644	0.106704	0	0.281179	0.189811	0.692806	0.594168	0.91796	20	0.71288	2.13408	0	5.62359	3.79622	794.489	400	1.98622
IC39	2.6	2021	2021-05	0.229379	0.386551	0.111896	0.0497112	0.0804234	0.0236372	0.0439479	0.0931046	0.100661	0.0925373	0.324716	0.415248	0.692606	0.526481	3.14023	21	1.9552	2.11387	1.94328	6.81904	8.72021	1096.2	441	2.48571
FR4B	0.38	2021	2021-06	0.320444	0.0655516	0.335613	0.180391	0.0996804	0.244039	0.305796	1	0.398489	0	1	0.734094	0.69248	0.712815	0.458943	12	12	4.78187	0	12	8.80913	362.648	144	2.51839
BT23	0.88	2022	2022-01	0.399787	0	0.166436	0.227975	0.314416	0.213174	0.121433	0.201366	1	0.291685	1	0.780808	0.692418	0.673455	1.0628	11	2.21502	11	3.20853	11	8.58889	345.886	121	2.85856
FM3A	0.93	2022	2022-04	0.239584	0.512494	0.239278	0.0517806	0.0507178	0.144493	0.169174	0.380113	0.183843	0.0074145	0.881033	0	0.692322	0.700781	1.12316	11	4.18125	2.02228	0.0815595	9.69137	0	300.498	121	2.48346
FF2A	2.77	2022	2022-02	0.0929053	0.353202	0.253683	0.0906477	0.0645231	0.0131475	0.0759176	0.894013	0	1	0.678143	0.259727	0.692242	0.731777	3.34525	9	8.04611	0	9	6.10329	2.33754	191.312	81	2.36188
BX29	0.71	2021	2021-09	0.333046	0.0165634	0.241318	0.421312	0.564496	0.147727	0.156285	0	0.365262	0	0.00165655	0.312	0.692082	0.469312	0.857414	23	0	8.40103	0	0.0381007	7.17599	1355.74	529	2.56283
BT23	0.88	2022	2022-08	0.358889	0	0.181255	0.312018	0.314416	0.106313	0.121433	0.354121	0.30809	0.469272	1	0.746466	0.691931	0.673455	1.06267	11	3.89533	3.38899	5.16199	11	8.21112	345.886	121	2.85856
ER3A	2	2022	2022-07	0.349298	0.00131401	0.222788	0.140239	0.0811518	0.0754342	0.200114	1	0	0.900317	0.942872	0.493033	0.691867	0.716639	2.41512	9	9	0	8.10286	8.48585	4.4373	212.158	81	2.61923
QS31	2	2022	2022-09	0.313342	0.00259598	0.223296	0.108467	0.127668	0.0972676	0.133124	0.1354	0.310258	0.0961456	0.609242	0.857102	0.691655	0.69399	2.41499	11	1.4894	3.41284	1.0576	6.70166	9.42812	295.485	121	2.44203
IF5B	0.86	2021	2021-08	0.266692	0.569354	0.200059	0.0306458	0.0275106	0.0616262	0.0374287	0.378415	0.821892	0.35806	0.0998218	0.0650811	0.691621	0.517695	1.03844	21	7.94671	17.2597	7.51926	2.09626	1.3667	1052.2	441	2.38594
CZ1A	0.15	2021	2021-02	0.153523	0.106991	0.308118	0.373318	0.33091	0.314769	0.301052	0.533434	0.501729	1	0	0.27259	0.691459	0.686816	0.181116	12	6.40121	6.02075	12	0	3.27108	367.124	144	2.54947
BT23	0.88	2022	2022-10	0.266535	0.0226344	0.340126	0.272069	0.314416	0.115013	0.121433	0.281511	0.364422	0.870285	0	0.378309	0.691323	0.673455	1.06251	11	3.09662	4.00864	9.57314	0	4.1614	345.886	121	2.85856
BY31	1.3	2022	2022-08	0.0314913	0.000739609	0.0766512	0.835681	0.841067	0.0750309	0.115014	0.641452	0.198797	0.918886	0.0061507	0.513579	0.691224	0.685226	1.56958	11	7.05597	2.18677	10.1077	0.0676577	5.64937	361.246	121	2.98551
LF19	1.65	2022	2022-01	0.192121	0.361287	0.289327	0.0573242	0.0652014	0.0689122	0.0706643	0.495869	0.300366	0.394917	0.576889	0.395185	0.690726	0.507166	1.99191	21	10.4133	6.30769	8.29325	12.1147	8.29888	1159.26	441	2.62871
BR25	0.2	2021	2021-09	0.320067	0.0319827	0.421874	0.175677	0.173356	0.0801235	0.188717	0.408784	0	0.183159	0.1362	0.454542	0.690712	0.520874	0.241443	23	9.40204	0	4.21265	3.13259	10.4545	1199.12	529	2.26677
ER3A	2	2022	2022-01	0.334253	0	0.350593	0.136489	0.0811518	0.13334	0.200114	0.96289	0.223604	1	1	0	0.690555	0.716639	2.41433	9	8.66601	2.01244	9	9	0	212.158	81	2.61923
FM29	3.92	2022	2022-07	0.0895398	0.582231	0.0729501	0.0248921	0.0249894	0.114426	0.08127	0.513347	1	1	0.277245	0.871688	0.690495	0.713209	4.73202	11	5.64681	11	11	3.04969	9.58856	315.309	121	2.60586
BY31	1.3	2022	2022-06	0.0826062	0	0.0450354	0.833284	0.841067	0.080131	0.115014	0.632247	0.217756	0.309673	1	0.883032	0.690467	0.685226	1.56928	11	6.95472	2.39531	3.4064	11	9.71336	361.246	121	2.98551
IF49	3	2022	2022-10	0.192501	0.35994	0.125282	0.0434879	0.0379185	0.0632759	0.0643597	0.457929	0.4515	0.56394	0.0224186	0.388372	0.690441	0.533905	3.6214	21	9.6165	9.48151	11.8427	0.47079	8.15582	1088.59	441	2.46847
GK39	0.92	2022	2022-09	0.228476	0.221488	0.316162	0.078666	0.0873316	0.0654592	0.0642698	0.26389	0.52571	1	0.136133	0.265928	0.690433	0.716715	1.11056	11	2.90279	5.78281	11	1.49746	2.92521	302.689	121	2.50157
KV1B	0.49	2021	2021-08	0.228686	0.0900277	0.518795	0.188328	0.234077	0.0282117	0.153654	0.277115	0.0877303	0.427203	0	0.243822	0.690402	0.40737	0.591489	23	6.37364	2.0178	9.82567	0	5.6079	1384.63	529	2.61745
JB25	0.95	2022	2022-10	0.11442	0.456659	0.233894	0.110803	0.0627989	0.073835	0.116619	1	0.0433143	0.0228093	0	0.796945	0.690076	0.701777	1.14667	11	11	0.476457	0.250902	0	8.76639	251.888	121	2.08172
HS3B	0.4	2021	2021-08	0.33422	0.041821	0.478348	0.0667039	0.0662496	0.195846	0.227283	0.296788	0.46249	0.386546	0.335815	0.508716	0.690048	0.464468	0.482806	23	6.82612	10.6373	8.89057	7.72374	11.7005	1347.02	529	2.54634
XS13	0.37	2021	2021-11	0.254348	0	0.508473	0.153876	0.234235	0.217312	0.140866	0.163841	0.713786	0.155542	1	0.618243	0.689754	0.66988	0.446563	12	1.96609	8.56543	1.86651	12	7.41892	357.63	144	2.48354
BR23	0.61	2021	2021-08	0.319319	0.0321245	0.434273	0.126319	0.136941	0.157449	0.177379	0.182489	0.237042	0.274806	0.231694	0.54941	0.68975	0.542907	0.736224	23	4.19724	5.45198	6.32054	5.32896	12.6364	1127.41	529	2.1312
FR4B	0.38	2021	2021-02	0.239606	0.129593	0.481079	0.113127	0.0996804	0.150185	0.305796	0.440125	0	0.518214	0.601889	0	0.689745	0.712815	0.458631	12	5.2815	0	6.21856	7.22267	0	362.648	144	2.51839
FN2B	1.16	2022	2022-05	0.206239	0.21553	0.227534	0.0159783	0.0378349	0.0342179	0.065923	0.0808227	0.19618	0.56146	0.163211	0.451767	0.689445	0.703258	1.39993	11	0.889049	2.15798	6.17606	1.79532	4.96943	272.949	121	2.25578
EJ11	1.5	2022	2022-04	0.269203	0.00813127	0.532063	0.157541	0.0691882	0.0202897	0.173798	1	0	0.646452	0.838906	0.380108	0.689442	0.696983	1.81025	11	11	0	7.11097	9.22796	4.18119	257.543	121	2.12845
BR23	0.61	2021	2021-04	0.312721	0.0360985	0.439063	0.124925	0.136941	0.177584	0.177379	0.173057	0.439184	0.344848	0.136651	0.521933	0.689391	0.542907	0.736159	23	3.98031	10.1012	7.93149	3.14298	12.0045	1127.41	529	2.1312
GU23	0.6	2021	2021-04	0.271139	0.215114	0.493679	0.072167	0.11158	0.0773582	0.105488	0.197772	0.285973	0.824348	0.281962	0.179675	0.68906	0.703572	0.724031	12	2.37326	3.43168	9.89217	3.38355	2.1561	347.226	144	2.41129
HJ19	3.04	2022	2022-02	0.390632	0.0742344	0.302492	0.0168693	0.0274378	0.245354	0.198692	0.0172202	0.831602	0.558055	0.82922	0.0556532	0.689037	0.717283	3.6684	11	0.189422	9.14763	6.13861	9.12142	0.612185	315.083	121	2.60399
IS15	0.37	2022	2022-05	0.182654	0.0415703	0.364856	0.379022	0.414086	0.175876	0.251744	0.527096	0.0419511	0.624872	0.834856	0	0.688822	0.734902	0.446459	10	5.27096	0.419511	6.24872	8.34856	0	283.434	100	2.83434
ET1B	0.69	2021	2021-11	0.355306	0.0519427	0.509193	0.0839275	0.145489	0.0918707	0.182972	0.0849321	0.171657	0.0546885	0.0414105	0.245875	0.688773	0.657358	0.832576	12	1.01919	2.05988	0.656262	0.496926	2.9505	272.691	144	1.89369
GU21	0.75	2021	2021-07	0.307155	0.185235	0.437147	0.0583879	0.106704	0.0306971	0.0950602	0.215579	0.0382145	0.496113	0.192623	0.533943	0.688437	0.690131	0.904898	12	2.58694	0.458573	5.95335	2.31148	6.40732	318.674	144	2.21302
MZ15	0.3	2021	2021-10	0.373031	0.026692	0.499363	0.0130972	0.0314271	0.143933	0.157096	0.128081	0.345616	0.505023	0.881887	0.0894387	0.688311	0.691861	0.361948	11	1.40889	3.80178	5.55525	9.70075	0.983826	278.834	121	2.30441
IU19	0.3	2022	2022-05	0.27337	0.0304874	0.287205	0.37571	0.451108	0.164109	0.145262	0.43583	0.718293	0.100313	0.32716	0.446109	0.688154	0.538226	0.361934	23	10.0241	16.5208	2.30719	7.52468	10.2605	1389.42	529	2.62649
JV29	0.39	2021	2021-08	0.216139	0	0.426581	0.230152	0.145205	0.299849	0.330717	0.885966	0.363264	0.754594	1	0.393934	0.688138	0.684766	0.470512	12	10.6316	4.35917	9.05513	12	4.72721	393.117	144	2.72998
MZ15	0.3	2021	2021-12	0.360811	0.178965	0.319133	0.0262136	0.0314271	0.0706334	0.157096	0.25635	0	0.538192	0.208072	0.505574	0.687758	0.691861	0.361898	11	2.81985	0	5.92011	2.28879	5.56131	278.834	121	2.30441
FR29	1.35	2021	2021-07	0.123891	0.450275	0.182498	0.0879778	0.099568	0.163488	0.146592	0.173679	0.198564	0.677665	0.135625	0.52756	0.687706	0.674634	1.62852	12	2.08415	2.38277	8.13198	1.6275	6.33072	246.003	144	1.70835
FU23	0.54	2021	2021-09	0.280407	0	0.478348	0.0646897	0.123106	0.309781	0.216492	0.111805	0.534715	0.348771	1	0.0431219	0.687698	0.687481	0.651407	11	1.22986	5.88186	3.83648	11	0.474341	297.293	121	2.45697
IU19	0.3	2021	2021-05	0.228705	0.0258035	0.309508	0.428233	0.451108	0.138835	0.145262	0.606096	0.442381	0.392572	0.46529	0.298135	0.687673	0.538226	0.361891	23	13.9402	10.1748	9.02915	10.7017	6.85712	1389.42	529	2.62649
ER3A	2	2022	2022-03	0.485182	0	0.0913722	0.0586913	0.0811518	0.200764	0.200114	0.192944	0.483965	0	1	1	0.687602	0.716639	2.41256	9	1.73649	4.35568	0	9	9	212.158	81	2.61923
EJ11	1.5	2022	2022-08	0.310989	0.0228804	0.495487	0.0455057	0.0691882	0.0751695	0.173798	0.0411185	0.125434	0.361329	0.498927	0.473289	0.687594	0.696983	1.80942	11	0.452303	1.37978	3.97462	5.48819	5.20618	257.543	121	2.12845
RE13	1	2022	2022-08	0.486061	0	0.273103	0.017567	0.0266549	0.479357	0.409508	0.102769	0.794818	0.628386	1	0.435846	0.687566	0.721825	1.20627	11	1.13046	8.743	6.91225	11	4.79431	334.219	121	2.76214
GU23	0.6	2021	2021-01	0.257498	0.154089	0.489888	0.108937	0.11158	0.0603099	0.105488	0.426546	0.174224	0.897602	0.485659	0.196949	0.687487	0.703572	0.723748	12	5.11855	2.09069	10.7712	5.82791	2.36339	347.226	144	2.41129
MZ15	0.3	2021	2021-08	0.301053	0	0.538099	0.0265536	0.0314271	0.210318	0.157096	0.259674	0.65863	0.700383	1	0	0.687468	0.691861	0.361872	11	2.85642	7.24493	7.70422	11	0	278.834	121	2.30441
JV29	0.39	2021	2021-06	0.369333	0	0.282589	0.194513	0.145205	0.273909	0.330717	0.710421	0.283654	0.108524	1	0.809003	0.687115	0.684766	0.470392	12	8.52505	3.40385	1.30228	12	9.70804	393.117	144	2.72998
RE11	1.12	2022	2022-04	0.545228	0.0646765	0.241463	0.0376878	0.0426106	0.28231	0.461528	0.275667	0	0.288143	0	0.480033	0.686969	0.721784	1.35082	11	3.03234	0	3.16957	0	5.28037	319.765	121	2.64268
IF5B	0.86	2021	2021-07	0.247926	0.487656	0.190029	0.0305681	0.0275106	0.0445279	0.0374287	0.377048	0.545542	0.493736	0.545809	0.229559	0.686863	0.517695	1.03721	21	7.91801	11.4564	10.3685	11.462	4.82073	1052.2	441	2.38594
BU21	0.95	2022	2022-07	0.205559	0	0.478303	0.24179	0.449641	0.199451	0.182268	0.0915922	0.64152	0.235015	1	0	0.686654	0.700506	1.1457	11	1.00751	7.05671	2.58516	11	0	296.05	121	2.44669
FM19	4.58	2022	2022-07	0.119201	0.674689	0.0827101	0.0255453	0.0274879	0.0629235	0.0679673	0.44771	0.553537	0.888347	0.227533	1	0.686459	0.727429	5.52319	11	4.92481	6.08891	9.77181	2.50286	11	336.768	121	2.78321
HJ19	3.04	2022	2022-10	0.372789	0.0995787	0.260452	0.0164406	0.0274378	0.192453	0.198692	0	0.446544	0.699298	0.648328	0.501672	0.686413	0.717283	3.66601	11	0	4.91198	7.69228	7.1316	5.51839	315.083	121	2.60399
FN2B	1.16	2022	2022-03	0.173756	0.15862	0.201905	0.0297234	0.0378349	0.081806	0.065923	0.172482	0.602605	0.942604	0.420227	0.710375	0.686326	0.703258	1.39884	11	1.8973	6.62866	10.3686	4.62249	7.81412	272.949	121	2.25578
FT39	0.69	2022	2022-11	0.400681	0	0.33443	0.10799	0.150289	0.359915	0.217892	0.226501	1	0	1	1	0.686077	0.728031	0.832018	10	2.26501	10	0	10	10	295.51	100	2.9551
RU25	0.3	2022	2022-08	0.389178	0	0.340601	0.0372365	0.0311818	0.539688	0.518124	0.282277	0.448469	0	1	0.816226	0.686013	0.681223	0.361741	11	3.10505	4.93316	0	11	8.97848	300.845	121	2.48632
FM3A	0.93	2022	2022-05	0.221381	0.495892	0.208973	0.0400819	0.0507178	0.151696	0.169174	0.191163	0.287546	0.262872	0.993772	0.603398	0.685807	0.700781	1.12134	11	2.10279	3.163	2.89159	10.9315	6.63738	300.498	121	2.48346
KT11	0.67	2021	2021-11	0.294409	0.0221668	0.479365	0.0940642	0.109662	0.299897	0.293975	0.311618	0.521596	0.59208	0.995316	0	0.685714	0.684715	0.807829	12	3.73941	6.25915	7.10496	11.9438	0	424.379	144	2.94707
FF31	3.15	2022	2022-10	0.137075	0.406357	0.0781703	0.0247883	0.0404363	0.0294239	0.0325161	0.137488	0.556745	0.528553	0	0.931877	0.685317	0.73711	3.79762	11	1.51237	6.1242	5.81408	0	10.2507	320.42	121	2.6481
HS31	0.7	2021	2021-07	0.313335	0.059772	0.398912	0.0706963	0.0573934	0.270356	0.280564	0.661448	0.334993	1	0	0.22793	0.685301	0.698924	0.843913	12	7.93737	4.01992	12	0	2.73515	339.832	144	2.35994
CB19	1.06	2021	2021-03	0.552095	0.25783	0.194808	0.100275	0.0885956	0.126973	0.132923	0.388593	0.415924	0.59572	0.413862	0.056297	0.685291	0.582083	1.27792	21	8.16045	8.73441	12.5101	8.6911	1.18224	962.807	441	2.18324
RS11	4	2021	2021-06	0.196701	0.0140483	0.37971	0.185388	0.110087	0.162408	0.144228	1	0.630641	0.997817	0	0.0641283	0.685172	0.688038	4.82221	12	12	7.56769	11.9738	0	0.76954	394.095	144	2.73677
EJ11	1.5	2022	2022-03	0.260935	0.0262215	0.546544	0.0407015	0.0691882	0.15573	0.173798	0	0.309566	0.702863	0.421912	0.343217	0.685056	0.696983	1.80828	11	0	3.40523	7.7315	4.64103	3.77538	257.543	121	2.12845
RE11	1.12	2022	2022-06	0.600693	0.0228719	0.1788	0.0348736	0.0426106	0.379983	0.461528	0.237391	0.342294	0	0.646365	1	0.68453	0.721784	1.35	11	2.6113	3.76524	0	7.11001	11	319.765	121	2.64268
XS13	0.37	2021	2021-01	0.277225	0.0381321	0.327362	0.0769308	0.234235	0.30445	0.140866	0.0819125	1	0.0795903	0.584305	0.858439	0.68442	0.66988	0.445971	12	0.98295	12	0.955083	7.01166	10.3013	357.63	144	2.48354
JJ13	0.65	2022	2022-03	0.42327	0.298845	0.275734	0.0146235	0.0869597	0.029335	0.0531155	0	0.131145	0.237972	0.40745	0.179288	0.684264	0.702818	0.783431	11	0	1.4426	2.61769	4.48195	1.97216	249.854	121	2.06491
MZ15	0.3	2021	2021-03	0.482369	0	0.400764	0	0.0314271	0.266444	0.157096	0	0.923271	0.208265	1	0.317095	0.684235	0.691861	0.361581	11	0	10.156	2.29091	11	3.48805	278.834	121	2.30441
LZ1B	0.3	2021	2021-01	0.328983	0.04096	0.449906	0.0570054	0.101848	0.126654	0.116296	0.127749	0.494234	0.511116	0.968412	0.231316	0.68414	0.680504	0.361573	12	1.53299	5.93081	6.1334	11.6209	2.7758	362.611	144	2.51813
LL19	1.1	2022	2022-04	0.226637	0.00554518	0.351705	0.0688352	0.0864473	0.0454444	0.0680684	0.108949	0.126842	0.406991	0.662678	0.623952	0.684018	0.687178	1.32573	11	1.19844	1.39526	4.4769	7.28946	6.86347	278.147	121	2.29874
GD19	1.7	2022	2022-06	0.352846	0.325007	0.0784531	0.0723533	0.0538944	0.00615121	0.00651137	0.958994	0.362742	0	1	0.981452	0.683956	0.71975	2.04882	11	10.5489	3.99016	0	11	10.796	328.788	121	2.71726
FU23	0.54	2021	2021-10	0.223398	0.0393826	0.252224	0.0917888	0.123106	0.239431	0.216492	0.258854	0.36347	0.68487	0.739568	0.876314	0.683912	0.687481	0.650794	11	2.8474	3.99817	7.53357	8.13524	9.63945	297.293	121	2.45697
BU23	0.78	2021	2021-08	0.306441	0.149777	0.428702	0.113479	0.428322	0.0664447	0.191235	0	0.205653	0	0	0	0.6838	0.438033	0.940009	23	0	4.73002	0	0	0	1488.08	529	2.813
FR4B	0.38	2021	2021-08	0.232314	0.0950997	0.471112	0.0651541	0.0996804	0.326818	0.305796	0.0408194	0.749959	0.564963	0.816317	0.0503027	0.683758	0.712815	0.457948	12	0.489833	8.99951	6.77955	9.7958	0.603633	362.648	144	2.51839
IC29	6	2022	2022-08	0.218112	0.278107	0.108068	0.0563413	0.0519153	0.0478918	0.024206	0.378818	0.791619	0.1165	0.22885	0.5425	0.683625	0.439962	7.23052	21	7.95517	16.624	2.44651	4.80585	11.3925	1111.11	441	2.51953
JB25	0.95	2022	2022-09	0.0869259	0.43514	0.274932	0.0405019	0.0627989	0.0700076	0.116619	0.108452	0.0224642	0.366971	0.18105	0.29647	0.68336	0.701777	1.14476	11	1.19297	0.247106	4.03668	1.99155	3.26117	251.888	121	2.08172
EV1A	0.38	2021	2021-10	0.358392	0.0077418	0.378364	0.0583156	0.0861792	0.193784	0.175046	0.24942	0.638085	0.240745	0.938724	0.861786	0.683297	0.702932	0.457896	12	2.99304	7.65702	2.88894	11.2647	10.3414	429.749	144	2.98437
RU23	0.4	2022	2022-06	0.256265	0.0198991	0.501268	0.0228056	0.0239766	0.438307	0.512717	0.30684	0.143571	0.872779	0.547765	0.18236	0.682538	0.695445	0.481905	11	3.37524	1.57928	9.60057	6.02541	2.00596	277.145	121	2.29045
RU21	0.6	2022	2022-05	0.561348	0	0.236313	0.0483421	0.0324178	0.44721	0.526096	0.649158	0.197342	0	1	0.864787	0.682405	0.688747	0.722833	11	7.14074	2.17077	0	11	9.51266	309.751	121	2.55992
FN2B	1.16	2022	2022-11	0.238032	0.251669	0.238712	0.0314429	0.0378349	0.0115323	0.065923	0.183949	0.0024346	0.188409	0	0.338966	0.682222	0.703258	1.39741	11	2.02344	0.0267806	2.0725	0	3.72862	272.949	121	2.25578
LL19	1.1	2022	2022-02	0.235712	0	0.366862	0.0829262	0.0864473	0.0431034	0.0680684	0.301937	0.108268	0.328328	1	0.397105	0.682213	0.687178	1.32513	11	3.32131	1.19095	3.61161	11	4.36816	278.147	121	2.29874
RU21	0.6	2022	2022-11	0.472669	0	0.2991	0.017868	0.0324178	0.474206	0.526096	0.207993	0.242101	0.222248	1	0.604476	0.681885	0.688747	0.722739	11	2.28792	2.66311	2.44473	11	6.64924	309.751	121	2.55992
JU15	0.36	2021	2021-01	0.419675	0	0.252132	0.264575	0.220975	0.0870521	0.116215	0.491711	0.383464	0.368192	1	0.847344	0.681739	0.669611	0.433628	12	5.90054	4.60157	4.41831	12	10.1681	428.343	144	2.9746
IH1B	0.84	2022	2022-03	0.140999	0.312889	0.389523	0.186546	0.410856	0.0389364	0.095611	0.20298	0.213839	0.824624	0.126982	0.135643	0.681644	0.693372	1.01177	11	2.23278	2.35223	9.07087	1.3968	1.49207	357.033	121	2.95068
DE15	1.2	2021	2021-06	0.290115	0.684334	0.14027	0.0996034	0.0215251	0.0263774	0.071734	1	0	0.563547	0.0637399	1	0.681474	0.695681	1.44533	10	10	0	5.63547	0.637399	10	197.775	100	1.97775
LJ13	0.5	2021	2021-03	0.404279	0.183597	0.226249	0.00685428	0.0108265	0.10401	0.0824836	0.163623	0.499398	0.40903	0.420287	0.478571	0.681434	0.525104	0.602215	21	3.43608	10.4874	8.58963	8.82603	10.05	1012.11	441	2.29504
JV29	0.39	2021	2021-01	0.395066	0.0280706	0.234633	0.164276	0.145205	0.271477	0.330717	0.561485	0.276191	0	0.837458	0.947242	0.68128	0.684766	0.46971	12	6.73782	3.3143	0	10.0495	11.3669	393.117	144	2.72998
DU15	0.37	2022	2022-10	0.0738356	0	0.61668	0.286771	0.560993	0.144843	0.130476	0.00318445	0.79539	0.518092	1	0	0.681271	0.747299	0.445621	10	0.0318445	7.9539	5.18092	10	0	319.677	100	3.19677
CB19	1.06	2022	2022-08	0.563146	0.293891	0.189722	0.052507	0.0885956	0.0968228	0.132923	0.0843532	0.171583	0.497548	0.197008	0.156206	0.681148	0.582083	1.2766	21	1.77142	3.60323	10.4485	4.13716	3.28032	962.807	441	2.18324
MZ15	0.3	2021	2021-05	0.367196	0	0.515266	0.0526576	0.0314271	0.0901306	0.157096	0.514952	0.0919318	0.520861	1	0.0527213	0.680963	0.691861	0.361287	11	5.66447	1.01125	5.72947	11	0.579934	278.834	121	2.30441
BT23	0.88	2022	2022-11	0.393334	0	0.233337	0.219756	0.314416	0.101664	0.121433	0.186428	0.277988	0.319705	1	0.625775	0.680961	0.673455	1.05977	11	2.0507	3.05787	3.51676	11	6.88353	345.886	121	2.85856
GU23	0.6	2021	2021-05	0.238431	0.299586	0.445264	0.156282	0.11158	0.0743588	0.105488	0.721114	0.266312	1	0	0.400293	0.680927	0.703572	0.722567	12	8.65336	3.19575	12	0	4.80352	347.226	144	2.41129
GU21	0.75	2021	2021-09	0.360739	0.21367	0.314847	0.0378225	0.106704	0.129992	0.0950602	0.11928	0.362487	0.181364	0.0686851	0.919559	0.680916	0.690131	0.903206	12	1.43136	4.34984	2.17637	0.824221	11.0347	318.674	144	2.21302
NC1B	2.32	2022	2022-06	0.248188	0.521637	0.194604	0.0612096	0.0730232	0.0347228	0.0524605	0.152988	0	0.509314	0.220712	0.491348	0.680821	0.701672	2.79385	11	1.68287	0	5.60246	2.42783	5.40483	250.726	121	2.07211
RE11	1.12	2022	2022-07	0.500453	0.00201928	0.246486	0.0174197	0.0426106	0.530651	0.461528	0	0.870307	0.520758	0.968779	0.438347	0.680788	0.721784	1.34874	11	0	9.57338	5.72834	10.6566	4.82182	319.765	121	2.64268
NC1B	2.32	2022	2022-05	0.279503	0.516438	0.211895	0.0596662	0.0730232	0.036871	0.0524605	0.125726	0.0399985	0	0.26259	0.0611092	0.680739	0.701672	2.79379	11	1.38299	0.439984	0	2.88849	0.672201	250.726	121	2.07211
GZ19	0.54	2022	2022-10	0.2672	0.232419	0.426861	0.115441	0.10713	0.103709	0.0936129	0.6414	0.551508	0.294993	0.489512	0.268452	0.680689	0.505005	0.650272	23	14.7522	12.6847	6.78483	11.2588	6.17439	1288.44	529	2.43561
FN19	6.1	2022	2022-10	0.142478	0.484546	0.0521652	0.0180148	0.0196552	0.013079	0.0327908	0.425266	0.0560741	0.28112	0	0.920736	0.680503	0.736295	7.34532	11	4.67793	0.616815	3.09232	0	10.1281	305.838	121	2.52758
IB35	3.25	2021	2021-11	0.152012	0.266111	0.0921677	0.0966961	0.076364	0.0174893	0.0320491	0.719684	0.0624725	0.656962	0.99024	0.815803	0.680453	0.735437	3.91344	10	7.19684	0.624725	6.56962	9.9024	8.15803	301.986	100	3.01986
LL19	1.1	2022	2022-06	0.223768	0.0145413	0.393395	0.0773316	0.0864473	0.0294573	0.0680684	0.225315	0	0.431859	0.115434	0	0.680283	0.687178	1.32449	11	2.47847	0	4.75045	1.26978	0	278.147	121	2.29874
DC19	1.22	2022	2022-03	0.305168	0.294982	0.227198	0.241533	0.240549	0.0872759	0.155263	0.612786	0	0	0.362238	1	0.680216	0.749675	1.46896	11	6.74064	0	0	3.98462	11	332.837	121	2.75072
XS13	0.37	2021	2021-07	0.0925862	0	0.457027	0.426663	0.234235	0.159849	0.140866	0.454292	0.525043	0.692606	1	0.686472	0.680126	0.66988	0.445494	12	5.4515	6.30051	8.31127	12	8.23766	357.63	144	2.48354
ET1B	0.69	2021	2021-06	0.366047	0	0.441245	0.0666432	0.145489	0.280099	0.182972	0.0674409	0.609812	0.0234087	1	0.359368	0.680098	0.657358	0.83078	12	0.809291	7.31774	0.280905	12	4.31242	272.691	144	1.89369
HS31	0.7	2021	2021-04	0.368171	0.0415711	0.430076	0.0295158	0.0573934	0.218125	0.280564	0.146522	0.116464	0.62484	0.304506	0	0.680023	0.698924	0.842805	12	1.75826	1.39757	7.49808	3.65407	0	339.832	144	2.35994
FR29	1.35	2021	2021-10	0.226243	0.362582	0.330635	0.04044	0.099568	0.0717082	0.146592	0.0712677	0.0581202	0.133305	0.303967	0	0.679994	0.674634	1.6254	12	0.855212	0.697443	1.59965	3.6476	0	246.003	144	1.70835
RU25	0.3	2022	2022-06	0.176316	0.158548	0.573892	0.0220511	0.0311818	0.257401	0.518124	0.158167	0.110243	0.636771	0	0.307745	0.67999	0.681223	0.361199	11	1.73983	1.21267	7.00448	0	3.38519	300.845	121	2.48632
RU21	0.6	2022	2022-01	0.39757	0.0141789	0.301399	0.0337235	0.0324178	0.328183	0.526096	0.437529	0	0.410465	0.914415	0.594943	0.679937	0.688747	0.722389	11	4.81282	0	4.51511	10.0586	6.54437	309.751	121	2.55992
FM19	4.58	2022	2022-10	0.114252	0.646285	0.0984051	0.0192687	0.0274879	0.0601334	0.0679673	0.249342	0.520381	0.996392	0.347473	0.757086	0.679857	0.727429	5.51412	11	2.74277	5.72419	10.9603	3.8222	8.32795	336.768	121	2.78321
BZ13	0.68	2021	2021-02	0.215485	0.0389338	0.223664	0.469592	0.480774	0.157581	0.194567	0.354986	0.277314	0.262215	0.0595868	0.618108	0.679716	0.477125	0.818662	23	8.16468	6.37821	6.03094	1.3705	14.2165	1327.2	529	2.50888
BV39	0.31	2021	2021-05	0.246008	0.0577182	0.461192	0.212439	0.262158	0.117938	0.159376	0.159862	0.160787	0.489776	0.0401356	0.237122	0.679667	0.458346	0.373209	23	3.67682	3.69811	11.2649	0.92312	5.4538	1196.68	529	2.26216
FM35	0.75	2022	2022-08	0.286051	0.676199	0.179621	0.0335189	0.0530347	0.105459	0.14135	0.28437	0.163781	0	0	1	0.679539	0.712878	0.902896	9	2.55933	1.47403	0	0	9	200.73	81	2.47815
GK21	1.35	2022	2022-02	0.330928	0.177788	0.1792	0.123977	0.123622	0.0323712	0.0734933	0.469465	0	0.346605	0.693382	1	0.679017	0.743348	1.625	10	4.69465	0	3.46605	6.93382	10	249.95	100	2.4995
RE15	0.8	2022	2022-10	0.529517	0.00600899	0.30839	0.010818	0.0164811	0.309442	0.423205	0.264396	0.0674017	0.289276	0.960911	0.33421	0.678829	0.714261	0.962919	11	2.90836	0.741419	3.18204	10.57	3.67631	313.253	121	2.58887
FM35	0.75	2022	2022-06	0.192753	0.618227	0.262804	0.00714026	0.0530347	0.0986892	0.14135	0.0390761	0.138788	0.62087	0.349308	0.106948	0.678779	0.712878	0.902725	9	0.351685	1.24909	5.58783	3.14377	0.962528	200.73	81	2.47815
RU21	0.6	2022	2022-06	0.376695	0.000419239	0.228769	0.0332353	0.0324178	0.511864	0.526096	0.430461	0.304537	0.462781	0.997469	0.896062	0.678756	0.688747	0.722176	11	4.73507	3.34991	5.09059	10.9722	9.85669	309.751	121	2.55992
RU21	0.6	2022	2022-02	0.447526	0.16567	0.334422	0.00475794	0.0324178	0.405853	0.526096	0.0182016	0.128774	0.285264	0	0.458031	0.678579	0.688747	0.722144	11	0.200217	1.41651	3.1379	0	5.03834	309.751	121	2.55992
GU21	0.75	2021	2021-08	0.391615	0	0.33229	0.127466	0.106704	0.325204	0.0950602	0.539041	1	0	1	0.864559	0.678575	0.690131	0.902679	12	6.46849	12	0	12	10.3747	318.674	144	2.21302
JV29	0.39	2021	2021-07	0.304334	0	0.481006	0.0798939	0.145205	0.294013	0.330717	0.145847	0.345354	0.382645	1	0.23705	0.678477	0.684766	0.469382	12	1.75016	4.14424	4.59174	12	2.8446	393.117	144	2.72998
BZ13	0.68	2021	2021-06	0.260772	0.0391827	0.306023	0.302041	0.480774	0.21561	0.194567	0	0.630072	0.0142456	0.0535744	0.313686	0.6784	0.477125	0.818394	23	0	14.4916	0.327649	1.23221	7.21478	1327.2	529	2.50888
RE15	0.8	2022	2022-06	0.477614	0.00643786	0.361773	0.0170225	0.0164811	0.283395	0.423205	0.520436	0	0.466576	0.958122	0.0791439	0.678029	0.714261	0.962727	11	5.7248	0	5.13234	10.5393	0.870583	313.253	121	2.58887
FU23	0.54	2021	2021-07	0.240572	0.126839	0.294809	0.0812654	0.123106	0.115943	0.216492	0.201751	0.062876	0.583618	0.161227	0.719401	0.677919	0.687481	0.649823	11	2.21926	0.691636	6.4198	1.7735	7.91342	297.293	121	2.45697
GV11	0.99	2021	2021-12	0.590026	0.0697086	0.229409	0.0783648	0.0901187	0.0151925	0.0743726	0.431871	0.111043	0	0.649495	1	0.677899	0.7482	1.19134	11	4.75058	1.22147	0	7.14444	11	336.008	121	2.77692
FZ13	0.57	2022	2022-05	0.301357	0.013072	0.507409	0.101294	0.087523	0.0656168	0.153003	0.345289	0	0.69128	0.74427	0.306687	0.677744	0.664246	0.685894	11	3.79818	0	7.60408	8.18697	3.37355	296.868	121	2.45346
BU21	0.95	2022	2022-03	0.19978	0	0.228431	0.568951	0.449641	0.0874965	0.182268	0.483563	0	0.258566	1	0.549652	0.677676	0.700506	1.14314	11	5.31919	0	2.84423	11	6.04617	296.05	121	2.44669
IH1B	0.84	2022	2022-01	0.185916	0	0.435929	0.31261	0.410856	0.0467432	0.095611	0.394954	0.256714	0.678414	1	0	0.677452	0.693372	1.01072	11	4.3445	2.82385	7.46255	11	0	357.033	121	2.95068
IG15	0.76	2021	2021-05	0.289313	0.557539	0.195991	0	0.108034	0.0354633	0.0403671	0	0.292087	0.292169	0.131805	0.515451	0.677428	0.594168	0.914454	20	0	5.84174	5.84338	2.63609	10.309	794.489	400	1.98622
FZ13	0.57	2022	2022-04	0.364621	0	0.506811	0.0449776	0.087523	0.145817	0.153003	0.103169	0.264522	0.318541	1	0.309033	0.677365	0.664246	0.685829	11	1.13486	2.90974	3.50395	11	3.39936	296.868	121	2.45346
RU25	0.3	2022	2022-10	0.180157	0.0290344	0.594181	0.00897781	0.0311818	0.404306	0.518124	0.0513183	0.286259	0.62528	0.816874	0.263523	0.677358	0.681223	0.360962	11	0.564501	3.14885	6.87808	8.98561	2.89875	300.845	121	2.48632
GR15	0.54	2021	2021-12	0.200077	0.181278	0.428716	0.0791814	0.0524066	0.469322	0.497872	0.9689	0.391412	1	0	0.00941393	0.677126	0.710284	0.649694	12	11.6268	4.69694	12	0	0.112967	376.036	144	2.61136
GU23	0.6	2021	2021-11	0.253934	0.170861	0.507856	0.0526803	0.11158	0.145469	0.105488	0.0765302	0.732428	0.916744	0.429676	0.115076	0.677098	0.703572	0.721878	12	0.918362	8.78913	11.0009	5.15611	1.38091	347.226	144	2.41129
JJ13	0.65	2022	2022-11	0.37549	0.175568	0.203788	0.0632519	0.0869597	0	0.0531155	0.310559	0	0.388837	0.820746	0.643246	0.676923	0.702818	0.782	11	3.41615	0	4.2772	9.02821	7.07571	249.854	121	2.06491
IU19	0.3	2021	2021-04	0.229088	0.0234886	0.340626	0.41999	0.451108	0.136838	0.145262	0.579374	0.420583	0.390062	0.533557	0.0916819	0.676765	0.538226	0.360909	23	13.3256	9.67341	8.97142	12.2718	2.10868	1389.42	529	2.62649
LR1B	0.77	2022	2022-11	0.17963	0.0103034	0.485861	0.115229	0.111484	0.315189	0.311279	0.505281	0.519082	0.361024	0.552833	0.248788	0.676591	0.504571	0.926292	23	11.6215	11.9389	8.30356	12.7152	5.72213	1340.96	529	2.53489
BT23	0.88	2022	2022-09	0.466963	0	0.153105	0.203635	0.314416	0.143563	0.121433	0.157127	0.549275	0	1	0.8117	0.676513	0.673455	1.0586	11	1.72839	6.04203	0	11	8.9287	345.886	121	2.85856
BR23	0.61	2021	2021-11	0.31512	0.0232889	0.439962	0.142536	0.136941	0.163551	0.177379	0.292159	0.298296	0.319382	0.443012	0.516775	0.676375	0.542907	0.733777	23	6.71965	6.8608	7.34578	10.1893	11.8858	1127.41	529	2.1312
FW21	0.8	2021	2021-01	0.252147	0.229711	0.272086	0.24262	0.0769756	0.0690599	0.186925	1	0.0677512	0.711867	0.562327	0.734748	0.676222	0.633574	0.962293	12	12	0.813014	8.5424	6.74793	8.81697	387.787	144	2.69297
CZ1A	0.15	2021	2021-10	0.268532	0.00101315	0.229736	0.278479	0.33091	0.282618	0.301052	0.280014	0.321234	0.479625	0.990531	0.627869	0.676115	0.686816	0.180425	12	3.36017	3.85481	5.7555	11.8864	7.53442	367.124	144	2.54947
HS13	1.25	2021	2021-02	0.452955	0.0539758	0.306568	0.0238196	0.0796169	0.00327966	0.213053	0.111558	0	0.320129	0	0.466695	0.675791	0.715027	1.50342	11	1.22714	0	3.52142	0	5.13364	307.367	121	2.54023
FU23	0.54	2021	2021-05	0.195765	0.021275	0.490051	0.228372	0.123106	0.154113	0.216492	1	0.15579	0.84778	0.859311	0	0.675754	0.687481	0.649472	11	11	1.71369	9.32559	9.45242	0	297.293	121	2.45697
KT11	0.67	2021	2021-07	0.266935	0.0897943	0.418877	0.114353	0.109662	0.151083	0.293975	0.586784	0.126412	0.98119	0.408109	0.471799	0.675742	0.684715	0.805824	12	7.0414	1.51695	11.7743	4.89731	5.66159	424.379	144	2.94707
RE13	1	2022	2022-10	0.580115	0.000658237	0.262065	0.0285564	0.0266549	0.276039	0.409508	0.578713	0	0	0.992587	0.610023	0.675547	0.721825	1.20266	11	6.36584	0	0	10.9185	6.71025	334.219	121	2.76214
RE13	1	2022	2022-02	0.43044	0.0887899	0.298714	0.0382839	0.0266549	0.323241	0.409508	1	0.184522	1	0	0.0317152	0.675443	0.721825	1.20263	11	11	2.02974	11	0	0.348867	334.219	121	2.76214
FU23	0.54	2021	2021-01	0.339565	0.135118	0.417294	0.0440855	0.123106	0.123035	0.216492	0	0.0801408	0	0.106483	0.268084	0.675388	0.687481	0.649413	11	0	0.881549	0	1.17131	2.94892	297.293	121	2.45697
CZ1A	0.15	2021	2021-03	0.28193	0.0381938	0.368258	0.173687	0.33091	0.263553	0.301052	0	0.214208	0.419001	0.64302	0	0.675139	0.686816	0.180381	12	0	2.5705	5.02801	7.71624	0	367.124	144	2.54947
JJ13	0.65	2022	2022-09	0.406099	0.122101	0.254292	0.0673468	0.0869597	0.00560883	0.0531155	0.33671	0.0250748	0.292188	1	0.317561	0.675138	0.702818	0.781652	11	3.70381	0.275823	3.21406	11	3.49317	249.854	121	2.06491
ET1B	0.69	2021	2021-01	0.255248	0	0.573992	0.06746	0.145489	0.222953	0.182972	0.0682675	0.476788	0.346064	1	0.13764	0.67482	0.657358	0.829688	12	0.81921	5.72145	4.15277	12	1.65168	272.691	144	1.89369
IH1B	0.84	2022	2022-11	0.0871227	0.027741	0.178101	0.709929	0.410856	0.142338	0.095611	1	0.781721	1	0.922597	0.753619	0.674767	0.693372	1.01004	11	11	8.59893	11	10.1486	8.28981	357.033	121	2.95068
HS31	0.7	2021	2021-05	0.400223	0.00794348	0.349633	0.0977715	0.0573934	0.190289	0.280564	1	0	0.405554	0.867104	0.588358	0.674741	0.698924	0.841696	12	12	0	4.86664	10.4052	7.0603	339.832	144	2.35994
XS13	0.37	2021	2021-09	0.14742	0	0.487651	0.300184	0.234235	0.0989834	0.140866	0.319623	0.325122	0.510553	1	0.645858	0.674731	0.66988	0.444895	12	3.83547	3.90147	6.12663	12	7.75029	357.63	144	2.48354
LU1A	0.58	2021	2021-05	0.288695	0.140918	0.507476	0.0259923	0.0785105	0.119871	0.154108	0.154073	0.185277	0.41728	0	0.415553	0.674327	0.438181	0.697333	23	3.54368	4.26136	9.59743	0	9.55773	1417.26	529	2.67913
EX2A	0.54	2021	2021-11	0.392186	0	0.40626	0.088458	0.0793591	0.171746	0.22915	0.588254	0.243071	0.0991005	1	0.831865	0.674056	0.674885	0.649197	12	7.05904	2.91685	1.18921	12	9.98237	412.021	144	2.86126
IZ29	0.4	2022	2022-04	0.208729	0.025122	0.263737	0.560354	0.613022	0.100327	0.104398	0.113239	0.390035	0.301448	0.558168	0.231201	0.673893	0.4865	0.480867	23	2.60449	8.97081	6.93331	12.8379	5.31762	1245.17	529	2.35381
HS13	1.25	2021	2021-01	0.470179	0.00822296	0.276073	0.00942169	0.0796169	0.161963	0.213053	0	0.309135	0.221096	0.847655	0.66695	0.673668	0.715027	1.50263	11	0	3.40048	2.43205	9.3242	7.33644	307.367	121	2.54023
KV1B	0.49	2022	2022-02	0.338088	0.043125	0.466755	0.0863212	0.234077	0.154738	0.153654	0.127017	0.481191	0.0973215	0.52098	0.412596	0.673626	0.40737	0.589023	23	2.92139	11.0674	2.23839	11.9825	9.4897	1384.63	529	2.61745
FN2B	1.16	2022	2022-04	0.20506	0.210018	0.173203	0.0223216	0.0378349	0.0543385	0.065923	0.123123	0.36802	0.575288	0.188103	1	0.673623	0.703258	1.39442	11	1.35435	4.04822	6.32816	2.06913	11	272.949	121	2.25578
FM19	4.58	2022	2022-09	0.121194	0.728572	0.104829	0.0407082	0.0274879	0.0163432	0.0679673	0.926928	0	0.844831	0	0.657665	0.673407	0.727429	5.50526	11	10.1962	0	9.29315	0	7.23431	336.768	121	2.78321
GK39	0.92	2022	2022-10	0.243335	0.226741	0.330347	0.0703206	0.0873316	0.0798978	0.0642698	0	1	0.808208	0.0276269	0	0.673211	0.716715	1.10581	11	0	11	8.89029	0.303896	0	302.689	121	2.50157
BU21	0.95	2022	2022-06	0.244687	0.000329418	0.471155	0.165342	0.449641	0.262011	0.182268	0	1	0.0755403	0.988142	0.0157232	0.673036	0.700506	1.14182	11	0	11	0.830943	10.8696	0.172955	296.05	121	2.44669
LD19	1.92	2022	2022-02	0.282177	0.448708	0.226529	0.0278246	0.0314576	0.0431155	0.0520886	0.316864	0.188368	0.576706	0	0.356506	0.672928	0.628429	2.30761	21	6.65415	3.95573	12.1108	0	7.48662	854.077	441	1.93668
BZ15	0.3	2022	2022-05	0.184117	0.0190987	0.300631	0.449816	0.49317	0.20882	0.173539	0.444433	0.552732	0.439655	0.110144	0.556163	0.672778	0.40852	0.36055	22	9.77753	12.1601	9.67242	2.42317	12.2356	1397.01	484	2.88638
RE15	0.8	2022	2022-09	0.55733	0	0.263226	0.00981447	0.0164811	0.332423	0.423205	0.222984	0.12687	0.194269	1	0.550009	0.672733	0.714261	0.961456	11	2.45282	1.39557	2.13696	11	6.0501	313.253	121	2.58887
FR29	1.35	2021	2021-06	0.251308	0.393076	0.144682	0.0316774	0.099568	0.0719988	0.146592	0.0523903	0.0585649	0	0.245429	0.662236	0.672706	0.674634	1.62245	12	0.628684	0.702779	0	2.94515	7.94683	246.003	144	1.70835
LX15	0.25	2021	2021-07	0.353119	0.0977338	0.495756	0.00858671	0.02731	0.0822135	0.0865126	0.0930435	0.463618	0.259652	0.440025	0.486404	0.672651	0.505016	0.300449	22	2.04696	10.1996	5.71234	9.68054	10.7009	1150.3	484	2.37665
CB19	1.06	2022	2022-11	0.5823	0.28343	0.195393	0.0458365	0.0885956	0.0798384	0.132923	0.0418685	0.0339402	0.327394	0.259918	0.0448167	0.672642	0.582083	1.2739	21	0.879239	0.712744	6.87527	5.45828	0.941151	962.807	441	2.18324
FU23	0.54	2021	2021-03	0.169946	0.00150631	0.422675	0.227898	0.123106	0.260263	0.216492	0.997425	0.414179	1	0.990039	0.248257	0.672494	0.687481	0.648944	11	10.9717	4.55597	11	10.8904	2.73083	297.293	121	2.45697
BY31	1.3	2022	2022-11	0.0443935	0	0.0490826	0.819181	0.841067	0.121785	0.115014	0.578083	0.372599	0.765111	1	0.835738	0.672487	0.685226	1.56227	11	6.35891	4.09859	8.41622	11	9.19312	361.246	121	2.98551
CZ1A	0.15	2021	2021-07	0.34485	0.00434915	0.178117	0.380467	0.33091	0.263314	0.301052	0.552537	0.212861	0.13431	0.95935	0.861836	0.672298	0.686816	0.180253	12	6.63045	2.55434	1.61172	11.5122	10.342	367.124	144	2.54947
TV19	0.73	2021	2021-09	0.232681	0.0321742	0.373359	0.222892	0.336579	0.177673	0.299171	0.0392379	0	0	0	0.0781711	0.672089	0.401133	0.877188	23	0.902471	0	0	0	1.79793	1555.23	529	2.93994
KT11	0.67	2021	2021-10	0.336215	0.136795	0.396154	0.0833819	0.109662	0.10348	0.293975	0.166738	0	0	0	0.649033	0.671782	0.684715	0.805028	12	2.00085	0	0	0	7.7884	424.379	144	2.94707
BR21	1.15	2021	2021-09	0.314244	0.0510105	0.445323	0.0968085	0.131895	0.198868	0.206899	0.445277	0.437074	0.579712	0	0	0.671414	0.479396	1.38164	23	10.2414	10.0527	13.3334	0	0	1454.44	529	2.74942
FZ13	0.57	2022	2022-11	0.271075	0	0.511758	0.0982837	0.087523	0.180642	0.153003	0.332349	0.379384	0.869696	1	0.289625	0.671277	0.664246	0.684788	11	3.65584	4.17323	9.56666	11	3.18588	296.868	121	2.45346
FR29	1.35	2021	2021-04	0.136155	0.520926	0.232436	0.0797657	0.099568	0.039485	0.146592	0.155988	0.00881167	0.612437	0	0.349715	0.671091	0.674634	1.62179	12	1.87185	0.10574	7.34925	0	4.19658	246.003	144	1.70835
BJ1B	1.09	2021	2021-12	0.268125	0.375898	0.226492	0.175708	0.284251	0.0793884	0.100056	0.395675	0.459917	0.555369	0.639658	0.317621	0.671063	0.48682	1.30944	19	7.51783	8.73842	10.552	12.1535	6.0348	1142.01	361	3.16345
LZ1B	0.3	2021	2021-11	0.214158	0.0342736	0.422907	0.194774	0.101848	0.195439	0.116296	0.712116	0.797304	0.926448	1	0.316052	0.670842	0.680504	0.360376	12	8.5454	9.56765	11.1174	12	3.79262	362.611	144	2.51813
RC19	4.5	2022	2022-11	0.52041	0.0714364	0.293028	0.0141845	0.00941406	0.058668	0.116275	0.854964	0.0987823	1	0	0	0.670754	0.673693	5.40552	11	9.40461	1.08661	11	0	0	309.115	121	2.55467
FF2A	2.77	2022	2022-01	0.154191	0.704716	0.182634	0.0149115	0.0645231	0.0576331	0.0759176	0	0.292222	0.50928	0	0.96423	0.670705	0.731777	3.32736	9	0	2.63	4.58352	0	8.67807	191.312	81	2.36188
JV29	0.39	2021	2021-10	0.266637	0.0257608	0.216331	0.218985	0.145205	0.507319	0.330717	0.830964	1	0.541625	0.850834	1	0.670676	0.684766	0.468469	12	9.97157	12	6.4995	10.21	12	393.117	144	2.72998
BD1B	4.55	2022	2022-07	0.209952	0.21517	0.131798	0.132116	0.204551	0.0374673	0.0840451	0	0.236793	0.459719	0.630233	1	0.67058	0.724348	5.46534	9	0	2.13114	4.13748	5.67209	9	204.398	81	2.52343
JU15	0.36	2021	2021-05	0.396685	0	0.382711	0.125863	0.220975	0.0787793	0.116215	0.163287	0.347022	0.424436	1	0.546706	0.670509	0.669611	0.432415	12	1.95945	4.16427	5.09323	12	6.56048	428.343	144	2.9746
GR15	0.54	2021	2021-07	0.423746	0.13645	0.284401	0.0239383	0.0524066	0.346622	0.497872	0.141652	0	0.373432	0.247289	0.74725	0.670064	0.710284	0.64855	12	1.69983	0	4.48119	2.96747	8.967	376.036	144	2.61136
GU25	0.48	2022	2022-08	0.463615	0.120716	0.266752	0.221847	0.125924	0.0588454	0.089466	1	0.276029	0	1	1	0.670054	0.707923	0.576488	11	11	3.03632	0	11	11	270.535	121	2.23583
FR29	1.35	2021	2021-08	0.219245	0.209604	0.161997	0.0345843	0.099568	0.0560521	0.146592	0.0586527	0.0341629	0.170522	0.597631	0.600573	0.67002	0.674634	1.62136	12	0.703833	0.409955	2.04626	7.17158	7.20688	246.003	144	1.70835
DE15	1.2	2021	2021-08	0.262733	0.594518	0.261952	0.0212015	0.0215251	0.0366988	0.071734	0.212859	0.102979	0.932767	0.557955	0.133544	0.669989	0.695681	1.4412	10	2.12859	1.02979	9.32767	5.57955	1.33544	197.775	100	1.97775
FR41	0.75	2021	2021-11	0.245909	0	0.512644	0.100646	0.133241	0.310947	0.257391	0.16822	0.686279	0.611651	1	0	0.669916	0.691114	0.900731	12	2.01864	8.23534	7.33981	12	0	387.709	144	2.69243
EX2A	0.54	2021	2021-07	0.254218	0.0373324	0.411009	0.0957706	0.0793591	0.277934	0.22915	0.636883	0.446225	0.983563	0	0.815955	0.669639	0.674885	0.648482	12	7.6426	5.3547	11.8028	0	9.79147	412.021	144	2.86126
GW1A	0.5	2021	2021-08	0.299541	0.172072	0.469146	0.0933912	0.103302	0.14291	0.112428	0.305125	0.672685	0.357187	0.376853	0.415852	0.669562	0.595493	0.600434	23	7.01788	15.4718	8.21529	8.66762	9.56459	1112.54	529	2.10311
BY31	1.3	2022	2022-04	0.043672	0	0.0456307	0.891448	0.841067	0.121569	0.115014	0.855635	0.371798	0.773709	1	0.876076	0.66947	0.685226	1.56109	11	9.41198	4.08978	8.5108	11	9.63683	361.246	121	2.98551
LR1B	0.77	2022	2022-04	0.175519	0.0136905	0.478608	0.102856	0.111484	0.351452	0.311279	0.407009	0.688173	0.418148	0.405833	0.283672	0.669202	0.504571	0.924586	23	9.36121	15.828	9.6174	9.33417	6.52446	1340.96	529	2.53489
ET1B	0.69	2021	2021-03	0.264893	0	0.615554	0.0636513	0.145489	0.19523	0.182972	0.0644132	0.412254	0.317977	1	0.0682194	0.669183	0.657358	0.828521	12	0.772959	4.94705	3.81572	12	0.818633	272.691	144	1.89369
IH1B	0.84	2022	2022-04	0.101733	0.318954	0.180972	0.315232	0.410856	0.0316418	0.095611	0.398946	0.173777	0.952441	0.110058	0.745225	0.669151	0.693372	1.00863	11	4.38841	1.91155	10.4768	1.21064	8.19747	357.033	121	2.95068
BU21	0.95	2022	2022-08	0.263221	0.000689509	0.391303	0.256524	0.449641	0.11748	0.182268	0.109244	0.171811	0	0.975181	0.191376	0.668859	0.700506	1.14062	11	1.20169	1.88992	0	10.727	2.10514	296.05	121	2.44669
FU23	0.54	2021	2021-11	0.214253	0.00558991	0.398918	0.174115	0.123106	0.0901123	0.216492	0.705583	0	0.738783	0.963035	0.335793	0.66864	0.687481	0.64832	11	7.76141	0	8.12662	10.5934	3.69373	297.293	121	2.45697
FU21	0.67	2021	2021-09	0.342042	0.00098288	0.365397	0.0114722	0.0820816	0.274461	0.271951	0	0.354159	0.423875	0.986528	0.39832	0.668637	0.691853	0.804396	11	0	3.89575	4.66262	10.8518	4.38152	301.693	121	2.49333
HJ19	3.04	2022	2022-06	0.338211	0.190414	0.222576	0.0259009	0.0274378	0.196618	0.198692	0.380028	0.476854	0.973007	0	0.903517	0.668548	0.717283	3.64972	11	4.18031	5.24539	10.7031	0	9.93869	315.083	121	2.60399
FT39	0.69	2022	2022-01	0.275354	0	0.609997	0.0669971	0.150289	0.109241	0.217892	0	0.303518	0.55456	1	0.24727	0.668005	0.728031	0.828277	10	0	3.03518	5.5456	10	2.4727	295.51	100	2.9551
DT1A	0.4	2021	2021-11	0.253913	0.00192723	0.477918	0.115359	0.10346	0.159823	0.190194	0.41521	0.21453	0.69094	0.987436	0.407449	0.667783	0.641072	0.480134	12	4.98251	2.57436	8.29128	11.8492	4.88939	401.159	144	2.78583
IS25	0.46	2021	2021-04	0.364776	0.138086	0.251523	0.292492	0.530747	0.0570139	0.163092	0	0	0	0	0.162144	0.667731	0.456788	0.552147	23	0	0	0	0	3.72932	1449.82	529	2.74068
FN2B	1.16	2022	2022-10	0.182202	0.162781	0.272304	0.0187475	0.0378349	0.0316968	0.065923	0.0992896	0.174649	0.843496	0.401434	0	0.667343	0.703258	1.39224	11	1.09219	1.92114	9.27846	4.41577	0	272.949	121	2.25578
MZ15	0.3	2021	2021-02	0.461168	0	0.104995	0.102257	0.0314271	0.116834	0.157096	1	0.21784	0.265807	1	1	0.667206	0.691861	0.360049	11	11	2.39624	2.92388	11	11	278.834	121	2.30441
JJ15	0.49	2021	2021-04	0.21008	0.465285	0.373088	0.0441055	0.0702909	0.0467567	0.024715	0.233188	0.622265	0.4165	0.503033	0	0.667129	0.519894	0.588068	22	5.13013	13.6898	9.163	11.0667	0	1123.01	484	2.32026
JB25	0.95	2022	2022-05	0.116242	0.367436	0.217244	0.0430672	0.0627989	0.128152	0.116619	0.140984	0.339214	0	0.750668	1	0.667123	0.701777	1.14013	11	1.55082	3.73135	0	8.25735	11	251.888	121	2.08172
JJ13	0.65	2022	2022-10	0.181932	0.337008	0.299963	0.0784327	0.0869597	0.0162338	0.0531155	0.407508	0.0725749	1	0.279503	0.0230418	0.666962	0.702818	0.780058	11	4.48259	0.798324	11	3.07453	0.25346	249.854	121	2.06491
IZ29	0.4	2022	2022-05	0.205051	0.0358035	0.250782	0.529808	0.613022	0.120253	0.104398	0.0294207	0.569572	0.331905	0.370308	0.32536	0.666947	0.4865	0.480034	23	0.676676	13.1001	7.63382	8.51708	7.48328	1245.17	529	2.35381
GJ1B	1.05	2022	2022-02	0.379382	0.200427	0.255593	0.0423369	0.109293	0.0199582	0.0559709	0	0	0	0.082978	0.556785	0.666677	0.730571	1.26	11	0	0	0	0.912758	6.12463	311.943	121	2.57804
IG13	1.2	2022	2022-07	0.161946	0.0982338	0.298344	0.409715	0.252028	0.0408715	0.0668449	0.678795	0.247525	0.891733	1	0	0.666664	0.697405	1.44	11	7.46674	2.72277	9.80906	11	0	303.308	121	2.50668
RC19	4.5	2022	2022-03	0.849917	0	0.0709012	0.00700986	0.00941406	0.128964	0.116275	0.347419	0.241752	0.312939	1	0.903111	0.666581	0.673693	5.39988	11	3.82161	2.65927	3.44233	11	9.93422	309.115	121	2.55467
JV29	0.39	2021	2021-11	0.188812	0	0.441042	0.253303	0.145205	0.348033	0.330717	1	0.511144	0.869841	1	0.352249	0.666529	0.684766	0.467984	12	12	6.13373	10.4381	12	4.22699	393.117	144	2.72998
RU21	0.6	2022	2022-10	0.344357	0	0.4449	0.0173447	0.0324178	0.456217	0.526096	0.200417	0.212276	0.543828	1	0	0.666452	0.688747	0.719961	11	2.20459	2.33503	5.98211	11	0	309.751	121	2.55992
KT11	0.67	2021	2021-01	0.273146	0.076379	0.377081	0.0933307	0.109662	0.248545	0.293975	0.30167	0.385227	0.893221	0.524593	0.797798	0.666253	0.684715	0.803917	12	3.62003	4.62273	10.7187	6.29512	9.57357	424.379	144	2.94707
GU23	0.6	2021	2021-03	0.279174	0.216264	0.533109	0.0524525	0.11158	0.0588114	0.105488	0.0751128	0.164402	0.781197	0.278123	0	0.666222	0.703572	0.71992	12	0.901353	1.97283	9.37436	3.33748	0	347.226	144	2.41129
LD19	1.92	2021	2021-04	0.360811	0.440675	0.17333	0.0356213	0.0314576	0.0321167	0.0520886	0.531342	0.098749	0.0369681	0.024721	0.649322	0.666103	0.628429	2.30368	21	11.1582	2.07373	0.77633	0.51914	13.6358	854.077	441	1.93668
NE19	1.16	2022	2022-01	0.238415	0.527086	0.21942	0.0565572	0.0773797	0.0350694	0.0408401	0.0780623	0.339122	1	0.44789	0.297894	0.666044	0.742769	1.39178	11	0.858685	3.73034	11	4.9268	3.27683	331.604	121	2.74053
KD19	2.42	2021	2021-04	0.202698	0.545009	0.25641	0.0244271	0.0503618	0.00666862	0.0174265	0.151136	0.0809676	0.434965	0.416071	0	0.665949	0.572877	2.90348	21	3.17386	1.70032	9.13426	8.73749	0	1034.8	441	2.34649
HZ15	0.4	2021	2021-03	0.236046	0.215468	0.427755	0.155022	0.31448	0.0400862	0.149092	0.2464	0.0146689	0.396277	0	0.383718	0.665842	0.413803	0.479901	23	5.66719	0.337386	9.11438	0	8.82551	1530.33	529	2.89287
KT11	0.67	2021	2021-12	0.269448	0.0354158	0.407044	0.14482	0.109662	0.335348	0.293975	1	0.615736	0.945601	0.880276	0.564093	0.66575	0.684715	0.803816	12	12	7.38883	11.3472	10.5633	6.76912	424.379	144	2.94707
NR1B	0.6	2021	2021-01	0.256342	0.306554	0.264858	0.0329927	0.0515262	0.245775	0.374652	0.164056	0.318107	0.820858	0.0445836	0.739188	0.665546	0.694285	0.719798	12	1.96867	3.81728	9.8503	0.535003	8.87026	383.42	144	2.66264
GK2B	0.89	2022	2022-11	0.30974	0.236033	0.370458	0.0970731	0.124827	0.0673283	0.0880246	0	0	0.494742	0.31159	0	0.665479	0.735022	1.06768	11	0	0	5.44216	3.42749	0	323.041	121	2.66976
FU21	0.67	2021	2021-10	0.401866	0.00454731	0.308672	0.128482	0.0820816	0.200759	0.271951	0.607907	0.0114315	0.262012	0.937671	0.883612	0.665373	0.691853	0.80374	11	6.68698	0.125747	2.88213	10.3144	9.71973	301.693	121	2.49333
IG15	0.76	2021	2021-12	0.245117	0.451608	0.264001	0.0496608	0.108034	0.0695317	0.0403671	0.10458	0.572686	0.510588	0.48407	0.0492243	0.665229	0.594168	0.911672	20	2.09161	11.4537	10.2118	9.6814	0.984486	794.489	400	1.98622
IG13	1.2	2022	2022-09	0.142344	0.175233	0.160106	0.577258	0.252028	0.144839	0.0668449	1	0.964251	1	0.817297	0.875639	0.6652	0.697405	1.43947	11	11	10.6068	11	8.99027	9.63203	303.308	121	2.50668
MZ15	0.3	2021	2021-01	0.559101	0	0.24233	0	0.0314271	0.282717	0.157096	0	1	0	1	0.682905	0.665174	0.691861	0.359866	11	0	11	0	11	7.51195	278.834	121	2.30441
BZ13	0.68	2021	2021-04	0.232739	0.0236563	0.326747	0.337317	0.480774	0.229611	0.194567	0.0747382	0.715182	0.167738	0.428601	0.237085	0.665113	0.477125	0.815683	23	1.71898	16.4492	3.85798	9.85783	5.45296	1327.2	529	2.50888
BT23	0.88	2022	2022-07	0.236662	0.00287291	0.240488	0.406623	0.314416	0.106644	0.121433	0.526075	0.310228	1	0.873073	0.609205	0.665003	0.673455	1.05556	11	5.78682	3.4125	11	9.60381	6.70125	345.886	121	2.85856
NE19	1.16	2022	2022-09	0.27168	0.57447	0.1678	0.0541657	0.0773797	0.0257508	0.0408401	0.0246894	0.159877	0.578621	0.274883	0.826769	0.664642	0.742769	1.3913	11	0.271584	1.75864	6.36483	3.02372	9.09446	331.604	121	2.74053
CB39	0.84	2022	2022-05	0.106231	0.858065	0.219123	0.0149718	0.01971	0.0165682	0.0396785	0.124771	0.097968	0.517039	0.307363	0.234424	0.664621	0.518513	1.00748	21	2.62018	2.05733	10.8578	6.45463	4.92291	911.358	441	2.06657
IS15	0.37	2022	2022-10	0.202368	0.251722	0.331456	0.135013	0.414086	0.167264	0.251744	0	0	0.526723	0	0.126855	0.664522	0.734902	0.443762	10	0	0	5.26723	0	1.26855	283.434	100	2.83434
GK39	0.92	2022	2022-03	0.293166	0.187881	0.277003	0.097343	0.0873316	0.0494554	0.0642698	0.854478	0	0.16505	0.830413	1	0.664489	0.716715	1.1034	11	9.39925	0	1.81555	9.13454	11	302.689	121	2.50157
FM29	3.92	2022	2022-10	0.0954636	0.675654	0.0759366	0.0158987	0.0249894	0.0923225	0.08127	0.144486	0.622968	0.946799	0	0.826558	0.664485	0.713209	4.70143	11	1.58935	6.85264	10.4148	0	9.09214	315.309	121	2.60586
JJ13	0.65	2022	2022-02	0.498636	0.329277	0.148466	0.0565402	0.0869597	0	0.0531155	0.267695	0	0	0.305424	1	0.664351	0.702818	0.779548	11	2.94465	0	0	3.35966	11	249.854	121	2.06491
FF31	3.15	2022	2022-11	0.148782	0.204415	0.102518	0.0147509	0.0404363	0.011483	0.0325161	0	0.217275	0.475818	0.508247	0.873333	0.664284	0.73711	3.77775	11	0	2.39003	5.234	5.59072	9.60666	320.42	121	2.6481
ES25	0.31	2021	2021-10	0.31924	0.012463	0.374697	0.104204	0.108724	0.160655	0.184974	0.51859	0.355151	0.0888646	0.372291	0.669609	0.664096	0.493476	0.371761	22	11.409	7.81333	1.95502	8.19041	14.7314	1295.21	484	2.67605
HS3B	0.4	2021	2021-11	0.368796	0.0586083	0.442651	0.0515985	0.0662496	0.0870786	0.227283	0.219573	0.205636	0.294828	0.0692054	0.606427	0.664079	0.464468	0.47969	23	5.05019	4.72963	6.78105	1.59172	13.9478	1347.02	529	2.54634
CB39	0.84	2022	2022-09	0.095064	0.849947	0.245616	0.028685	0.01971	0.0460785	0.0396785	0.259506	0.32028	0.645623	0.324943	0	0.663616	0.518513	1.00723	21	5.44962	6.72587	13.5581	6.82381	0	911.358	441	2.06657
FM19	4.58	2022	2022-08	0.121293	0.700424	0.0837898	0.015494	0.0274879	0.0916836	0.0679673	0.130045	0.895309	0.842664	0.118863	0.983289	0.663584	0.727429	5.49176	11	1.4305	9.8484	9.2693	1.30749	10.8162	336.768	121	2.78321
JV29	0.39	2021	2021-12	0.201932	0.172698	0.45757	0.0502843	0.145205	0.268695	0.330717	0	0.26765	0.81451	0	0.304605	0.663117	0.684766	0.467585	12	0	3.21181	9.77412	0	3.65526	393.117	144	2.72998
JB25	0.95	2022	2022-02	0.0630385	0.42701	0.275764	0.0321863	0.0627989	0.0658839	0.116619	0.00299422	0	0.665986	0.249448	0.286324	0.662866	0.701777	1.13892	11	0.0329364	0	7.32584	2.74393	3.14957	251.888	121	2.08172
ET1B	0.69	2021	2021-08	0.26799	0	0.552719	0	0.145489	0.447721	0.182972	0	1	0.308956	1	0.173172	0.662824	0.657358	0.827205	12	0	12	3.70747	12	2.07807	272.691	144	1.89369
JV29	0.39	2021	2021-04	0.338412	0	0.310998	0.0788367	0.145205	0.497092	0.330717	0.14064	0.968613	0.238926	1	0.727113	0.662671	0.684766	0.467532	12	1.68767	11.6234	2.86712	12	8.72536	393.117	144	2.72998
RE15	0.8	2022	2022-02	0.321457	0.134868	0.195518	0.0113982	0.0164811	0.439114	0.423205	0.288342	0.402954	1	0.122679	0.873523	0.662457	0.714261	0.95899	11	3.17176	4.4325	11	1.34947	9.60875	313.253	121	2.58887
CZ1A	0.15	2021	2021-06	0.354669	0.0150588	0.187802	0.379483	0.33091	0.225397	0.301052	0.549906	0	0.0898814	0.859252	0.817938	0.662273	0.686816	0.179802	12	6.59888	0	1.07858	10.311	9.81526	367.124	144	2.54947
LZ1B	0.3	2021	2021-08	0.27653	0.24595	0.204984	0.196961	0.101848	0.0491625	0.116296	0.721392	0.152803	0.700845	0	1	0.66225	0.680504	0.359602	12	8.6567	1.83363	8.41014	0	12	362.611	144	2.51813
IG15	0.76	2021	2021-10	0.265197	0.59599	0.182301	0.0806641	0.108034	0.0279429	0.0403671	0.16987	0.230147	0.411351	0.00393835	0.609293	0.662249	0.594168	0.910993	20	3.3974	4.60294	8.22703	0.078767	12.1859	794.489	400	1.98622
FU21	0.67	2021	2021-06	0.208731	0.00199128	0.411955	0.0762642	0.0820816	0.242954	0.271951	0.336618	0.207645	0.784566	0.972706	0	0.661905	0.691853	0.803043	11	3.7028	2.28409	8.63022	10.6998	0	301.693	121	2.49333
QS31	2	2022	2022-04	0.261286	0	0.464799	0.12995	0.127668	0.056703	0.133124	0.269856	0.0291267	0.386574	1	0	0.661615	0.69399	2.39697	11	2.96841	0.320393	4.25231	11	0	295.485	121	2.44203
IC39	2.6	2021	2021-06	0.240404	0.351048	0.122168	0.045342	0.0804234	0.022709	0.0439479	0.0412892	0.0857676	0	0.531883	0.205909	0.661418	0.526481	3.11591	21	0.867073	1.80112	0	11.1695	4.32409	1096.2	441	2.48571
HS31	0.7	2021	2021-01	0.459501	0	0.293351	0.0556623	0.0573934	0.343194	0.280564	0.473462	0.639744	0	1	1	0.661302	0.698924	0.838873	12	5.68154	7.67692	0	12	12	339.832	144	2.35994
NC1B	2.32	2022	2022-03	0.242843	0.549037	0.210566	0.0525481	0.0730232	0.0351701	0.0524605	0	0.00832734	0.596241	0	0.0941784	0.661125	0.701672	2.78014	11	0	0.0916007	6.55866	0	1.03596	250.726	121	2.07211
GW1A	0.5	2022	2022-10	0.314965	0.245418	0.478209	0.0567824	0.103302	0.0657061	0.112428	0	0.0567559	0.257258	0	0.359407	0.661118	0.595493	0.599168	23	0	1.30539	5.91694	0	8.26636	1112.54	529	2.10311
LL19	1.1	2022	2022-03	0.253419	0.00445157	0.328887	0.0726896	0.0864473	0.0474459	0.0680684	0.161739	0.142721	0.174845	0.729205	0.965465	0.660959	0.687178	1.31812	11	1.77913	1.56993	1.92329	8.02125	10.6201	278.147	121	2.29874
RS11	4	2021	2021-11	0.402909	0	0.29612	0.0546726	0.110087	0.145369	0.144228	0	0.535117	0	1	0.548449	0.660933	0.688038	4.79312	12	0	6.4214	0	12	6.58139	394.095	144	2.73677
LZ1B	0.3	2021	2021-12	0.237352	0.14062	0.523609	0.0318064	0.101848	0.0850496	0.116296	0.0208639	0.310923	0.842554	0.497598	0	0.660915	0.680504	0.359482	12	0.250366	3.73108	10.1106	5.97118	0	362.611	144	2.51813
BY31	1.3	2022	2022-09	0.106997	0	0.1206	0.668666	0.841067	0.101115	0.115014	0	0.295761	0.0189775	1	0	0.660841	0.685226	1.55773	11	0	3.25337	0.208752	11	0	361.246	121	2.98551
LC15	2.13	2022	2022-03	0.213045	0.110848	0.0785751	0.0147422	0.0323338	0.0306767	0.0342939	0.059518	0.389304	0.312235	0.768354	1	0.660708	0.72076	2.55219	11	0.654698	4.28234	3.43458	8.4519	11	312.614	121	2.58359
LF19	1.65	2021	2021-06	0.237271	0.269945	0.333196	0.0492373	0.0652014	0.0782847	0.0706643	0.394337	0.37019	0.152073	0.753353	0	0.660671	0.507166	1.97703	21	8.28109	7.77398	3.19354	15.8204	0	1159.26	441	2.62871
ET1B	0.69	2021	2021-04	0.230184	0	0.656396	0.0883434	0.145489	0.15939	0.182972	0.089401	0.328828	0.419051	1	0	0.66065	0.657358	0.826755	12	1.07281	3.94594	5.02861	12	0	272.691	144	1.89369
GW1A	0.5	2021	2021-01	0.27201	0.208022	0.477713	0.0775406	0.103302	0.0821211	0.112428	0.173015	0.187715	0.535543	0.192141	0.362496	0.660637	0.595493	0.599096	23	3.97934	4.31744	12.3175	4.41925	8.33741	1112.54	529	2.10311
IT2B	0.8	2021	2021-06	0.231783	0.0120222	0.470135	0.222096	0.462315	0.181912	0.145523	0.142674	0.760634	0.11556	0.406902	0.342609	0.660581	0.436286	0.95854	23	3.28151	17.4946	2.65789	9.35875	7.88001	1529.1	529	2.89054
KT11	0.67	2021	2021-06	0.265607	0.0669009	0.37028	0.136676	0.109662	0.382955	0.293975	0.889548	0.742159	1	0.606891	0.850847	0.660408	0.684715	0.802742	12	10.6746	8.9059	12	7.28269	10.2102	424.379	144	2.94707
DE15	1.2	2021	2021-10	0.257747	0.514184	0.280707	0.0133871	0.0215251	0.112726	0.071734	0.134404	0.861526	1	1	0	0.660401	0.695681	1.43774	10	1.34404	8.61526	10	10	0	197.775	100	1.97775
GV13	0.77	2022	2022-05	0.442963	0.174817	0.415218	0.0485619	0.0981922	0.0616861	0.0874161	0.106923	0.18643	0.346134	0.0983271	0.532732	0.660291	0.437611	0.922527	23	2.45924	4.2879	7.96108	2.26152	12.2528	1227.64	529	2.32069
RC19	4.5	2022	2022-01	0.601883	0	0.0635729	0.0130365	0.00941406	0.501782	0.116275	0.773754	1	0.830121	1	0.932906	0.660268	0.673693	5.39136	11	8.51129	11	9.13133	11	10.262	309.115	121	2.55467
FZ13	0.57	2022	2022-08	0.418685	0	0.330681	0.106541	0.087523	0.161078	0.153003	0.367851	0.314857	0	1	1	0.660161	0.664246	0.682887	11	4.04636	3.46342	0	11	11	296.868	121	2.45346
LC1A	2.6	2022	2022-11	0.158777	0.145148	0.102923	0.0231267	0.0207284	0.0176824	0.0272528	0.76703	0	1	0.40694	0.714995	0.660079	0.736173	3.11486	11	8.43733	0	11	4.47634	7.86495	330.682	121	2.73291
GZ19	0.54	2022	2022-06	0.281063	0.21464	0.446769	0.10577	0.10713	0.079865	0.0936129	0.499322	0.137455	0.0916133	0.647881	0.154173	0.659993	0.505005	0.646919	23	11.4844	3.16147	2.10711	14.9013	3.54598	1288.44	529	2.43561
JU15	0.36	2021	2021-08	0.570177	0.0263376	0.191974	0.113598	0.220975	0.189738	0.116215	0.134248	0.835797	0	0.797473	0.985848	0.659992	0.669611	0.431279	12	1.61098	10.0296	0	9.56968	11.8302	428.343	144	2.9746
FZ13	0.57	2022	2022-10	0.299278	0	0.477517	0.115711	0.087523	0.0835451	0.153003	0.407274	0.0591324	0.703528	1	0.423956	0.659918	0.664246	0.682846	11	4.48002	0.650456	7.73881	11	4.66352	296.868	121	2.45346
CZ1A	0.15	2021	2021-05	0.374534	0.00164552	0.319792	0.211217	0.33091	0.253779	0.301052	0.100286	0.159333	0	0.98462	0.219679	0.659841	0.686816	0.179693	12	1.20343	1.912	0	11.8154	2.63614	367.124	144	2.54947
RE13	1	2022	2022-01	0.482051	0.000312445	0.300724	0.0156538	0.0266549	0.411375	0.409508	0.0199111	0.529059	0.655176	0.996481	0	0.65984	0.721825	1.19795	11	0.219023	5.81964	7.20693	10.9613	0	334.219	121	2.76214
FZ13	0.57	2022	2022-02	0.257361	0.0151072	0.53893	0.0209811	0.087523	0.368807	0.153003	0	1	0.950501	0.704456	0.18303	0.659779	0.664246	0.682822	11	0	11	10.4555	7.74901	2.01333	296.868	121	2.45346
IH1B	0.84	2022	2022-02	0.121512	0.358399	0.403145	0.207843	0.410856	0	0.095611	0.235411	0	0.888057	0	0.0958239	0.65969	0.693372	1.00624	11	2.58952	0	9.76863	0	1.05406	357.033	121	2.95068
FR41	0.75	2021	2021-10	0.201096	0.163573	0.396323	0.0629039	0.133241	0.408016	0.257391	0	0.951607	0.859615	0.61208	0.4279	0.659657	0.691114	0.898423	12	0	11.4193	10.3154	7.34496	5.1348	387.709	144	2.69243
IB35	3.25	2021	2021-07	0.15173	0.263149	0.101085	0.0559797	0.076364	0.0146834	0.0320491	0.416642	0	0.659613	1	0.71549	0.659519	0.735437	3.89303	10	4.16642	0	6.59613	10	7.1549	301.986	100	3.01986
IB35	3.25	2021	2021-12	0.120193	0.566587	0.164692	0	0.076364	0.0272583	0.0320491	0	0.279974	0.956172	0	0	0.659276	0.735437	3.89279	10	0	2.79974	9.56172	0	0	301.986	100	3.01986
FZ13	0.57	2022	2022-06	0.24896	0.0511164	0.550362	0.0289064	0.087523	0.173816	0.153003	0.0340735	0.356871	1	0	0.138181	0.659168	0.664246	0.682718	11	0.374808	3.92558	11	0	1.51999	296.868	121	2.45346
EX2A	0.54	2021	2021-03	0.284289	0	0.517001	0.0671363	0.0793591	0.204171	0.22915	0.446463	0.305105	0.790786	1	0.460853	0.658548	0.674885	0.646685	12	5.35755	3.66126	9.48943	12	5.53024	412.021	144	2.86126
DC19	1.22	2022	2022-02	0.232473	0.359102	0.372332	0.164877	0.240549	0.0944917	0.155263	0.275416	0.0564735	1	0.197916	0	0.658306	0.749675	1.46094	11	3.02958	0.621209	11	2.17708	0	332.837	121	2.75072
HS31	0.7	2021	2021-02	0.40283	0	0.376011	0.0177979	0.0573934	0.429299	0.280564	0	1	0.387716	1	0.39543	0.658141	0.698924	0.83821	12	0	12	4.65259	12	4.74517	339.832	144	2.35994
BR23	0.61	2021	2021-10	0.301174	0.0418121	0.45088	0.119294	0.136941	0.182628	0.177379	0.134979	0.489822	0.467423	0	0.454137	0.65807	0.542907	0.730427	23	3.10453	11.2659	10.7507	0	10.4452	1127.41	529	2.1312
FN19	6.1	2022	2022-04	0.107089	0.286727	0.0480304	0.0173522	0.0196552	0.0210295	0.0327908	0.395921	0.229328	0.6614	0.798888	1	0.658062	0.736295	7.30425	11	4.35513	2.52261	7.2754	8.78777	11	305.838	121	2.52758
EB19	6.81	2021	2021-05	0.152402	0.348624	0.10242	0.0491035	0.0284104	0.0118596	0.0134939	1	0.308114	0.0820734	0.375612	0.245876	0.657911	0.555324	8.15411	21	21	6.47039	1.72354	7.88784	5.1634	1040.63	441	2.35969
JU15	0.36	2021	2021-11	0.44342	0	0.209589	0.189935	0.220975	0.148099	0.116215	0.314989	0.652376	0.310101	1	0.945293	0.65776	0.669611	0.431038	12	3.77986	7.82851	3.72121	12	11.3435	428.343	144	2.9746
LL19	1.1	2022	2022-07	0.214985	0.0020026	0.378304	0.0608803	0.0864473	0.0444486	0.0680684	0	0.118941	0.507996	0.878179	0.225864	0.657538	0.687178	1.31699	11	0	1.30835	5.58796	9.65997	2.4845	278.147	121	2.29874
HJ19	3.04	2022	2022-11	0.41066	0.171014	0.218343	0.0196713	0.0274378	0.131106	0.198692	0.129779	0	0.399518	0.138463	0.948435	0.657107	0.717283	3.63928	11	1.42757	0	4.3947	1.5231	10.4328	315.083	121	2.60399
ET1B	0.69	2021	2021-02	0.374086	0	0.528187	0.0372288	0.145489	0.113834	0.182972	0.0376745	0.222782	0	1	0.214148	0.656726	0.657358	0.825942	12	0.452094	2.67339	0	12	2.56978	272.691	144	1.89369
RC19	4.5	2022	2022-05	0.838771	0	0.103239	0.00455925	0.00941406	0.105811	0.116275	0.17406	0.194664	0.336182	1	0.771634	0.656619	0.673693	5.38644	11	1.91466	2.1413	3.698	11	8.48798	309.115	121	2.55467
EX2A	0.54	2021	2021-01	0.357715	0	0.398521	0.0522163	0.0793591	0.204875	0.22915	0.347243	0.306452	0.320078	1	0.857792	0.656163	0.674885	0.646298	12	4.16692	3.67743	3.84093	12	10.2935	412.021	144	2.86126
FR29	1.35	2021	2021-12	0.139688	0.519835	0.126168	0.0328679	0.099568	0.0825486	0.146592	0.0549551	0.0747085	0.59365	0.00209412	0.728172	0.656085	0.674634	1.61571	12	0.659461	0.896502	7.12379	0.0251294	8.73806	246.003	144	1.70835
IG15	0.76	2021	2021-04	0.254959	0.42634	0.232584	0.110781	0.108034	0.0143136	0.0403671	0.233293	0.117891	0.46195	0.568095	0.264596	0.656033	0.594168	0.909576	20	4.66586	2.35783	9.239	11.3619	5.29193	794.489	400	1.98622
FZ13	0.57	2022	2022-01	0.254518	0.0245174	0.585585	0.0579084	0.087523	0.10676	0.153003	0.158763	0.135701	0.967253	0.520361	0	0.655792	0.664246	0.68214	11	1.74639	1.49272	10.6398	5.72397	0	296.868	121	2.45346
IZ29	0.4	2021	2021-03	0.212221	0.0410575	0.216451	0.570662	0.613022	0.0769833	0.104398	0.141526	0.179704	0.272543	0.277902	0.574887	0.655784	0.4865	0.478694	23	3.25509	4.13319	6.2685	6.39176	13.2224	1245.17	529	2.35381
IG15	0.76	2022	2022-04	0.244028	0.500216	0.197281	0.0516009	0.108034	0.035095	0.0403671	0.108666	0.289053	0.515973	0.322427	0.506605	0.655443	0.594168	0.909441	20	2.17332	5.78107	10.3195	6.44854	10.1321	794.489	400	1.98622
HS31	0.7	2021	2021-09	0.459141	0	0.385854	0.0257724	0.0573934	0.221673	0.280564	0.0997139	0.131308	0.00246776	1	0.323437	0.655114	0.698924	0.837574	12	1.19657	1.57569	0.0296131	12	3.88124	339.832	144	2.35994
BT23	0.88	2022	2022-02	0.393476	0	0.0917045	0.165181	0.314416	0.178994	0.121433	0.087233	0.778692	0.319092	1	0.953985	0.65501	0.673455	1.05292	11	0.959562	8.56561	3.51001	11	10.4938	345.886	121	2.85856
MZ15	0.3	2021	2021-07	0.190663	0.225987	0.370093	0.0140683	0.0314271	0.0976241	0.157096	0.137578	0.127264	1	0	0.387912	0.654511	0.691861	0.358906	11	1.51336	1.39991	11	0	4.26703	278.834	121	2.30441
FR29	1.35	2021	2021-05	0.151562	0.503003	0.113966	0.0181026	0.099568	0.0805697	0.146592	0.0231457	0.0716804	0.530496	0.0344054	0.771625	0.654468	0.674634	1.61506	12	0.277749	0.860165	6.36595	0.412865	9.2595	246.003	144	1.70835
RS11	4	2021	2021-02	0.354055	0	0.280275	0.0678228	0.110087	0.0996512	0.144228	0.100602	0.278815	0.236401	1	0.640257	0.654204	0.688038	4.78504	12	1.20722	3.34578	2.83681	12	7.68308	394.095	144	2.73677
BR15	0.84	2021	2021-07	0.487892	0	0.332706	0.098355	0.476389	0.039118	0.0802557	0.10107	0.220499	0.390604	#NUM!	0.170332	0.654159	0.58507	1.00485	12	1.21284	2.64599	4.68724	#NUM!	2.04399	358.048	144	2.48644
FU21	0.67	2021	2021-02	0.498705	0	0.330823	0.0261955	0.0820816	0.24155	0.271951	0.0764927	0.201118	0	1	0.694107	0.653775	0.691853	0.801409	11	0.841419	2.2123	0	11	7.63517	301.693	121	2.49333
EX2A	0.54	2021	2021-05	0.353377	0	0.395187	0.0980217	0.0793591	0.132041	0.22915	0.651853	0.167109	0.347888	1	0.868964	0.6535	0.674885	0.645867	12	7.82224	2.00531	4.17466	12	10.4276	412.021	144	2.86126
DT1A	0.4	2021	2021-07	0.259307	0.000277609	0.395329	0.104488	0.10346	0.181934	0.190194	0.37608	0.333352	0.668562	0.99819	0.6861	0.653192	0.641072	0.478383	12	4.51296	4.00023	8.02275	11.9783	8.2332	401.159	144	2.78583
GW15	0.29	2021	2021-12	0.314207	0.209436	0.410071	0.088157	0.0871367	0.105377	0.0925347	0.473747	0.417279	0.284279	0.354699	0.62157	0.653022	0.564554	0.346813	23	10.8962	9.59742	6.53841	8.15808	14.2961	1170.16	529	2.21202
RU23	0.4	2022	2022-09	0.37895	0	0.378495	0.016349	0.0239766	0.415032	0.512717	0.171762	0.0741976	0.201309	1	0.693272	0.652778	0.695445	0.478333	11	1.88939	0.816174	2.2144	11	7.62599	277.145	121	2.29045
IC39	2.6	2021	2021-12	0.165126	0.442199	0.128888	0.106524	0.0804234	0.046454	0.0439479	0.766864	0.466761	0.631842	0	0.0689738	0.652625	0.526481	3.10905	21	16.1042	9.80197	13.2687	0	1.44845	1096.2	441	2.48571
SU15	0.36	2022	2022-04	0.430128	0.0221231	0.235419	0.0970441	0.105984	0.112173	0.212796	0.327104	0.174246	0.417109	0	0.572157	0.652175	0.384929	0.430435	23	7.52339	4.00765	9.59351	0	13.1596	1473.2	529	2.78487
FR4B	0.38	2021	2021-12	0.164452	0.171235	0.468527	0.06025	0.0996804	0.383031	0.305796	0	0.98863	1	0.343026	0.0633442	0.652166	0.712815	0.454347	12	0	11.8636	12	4.11631	0.76013	362.648	144	2.51839
GU23	0.6	2021	2021-12	0.421723	0	0.382397	0.194016	0.11158	0.0337302	0.105488	0.955889	0	0.0156619	1	0.686761	0.65206	0.703572	0.717371	12	11.4707	0	0.187942	12	8.24113	347.226	144	2.41129
XS13	0.37	2021	2021-02	0.301197	0	0.448001	0.127065	0.234235	0.083348	0.140866	0.135293	0.273766	0	1	0.698443	0.652056	0.66988	0.442378	12	1.62352	3.28519	0	12	8.38132	357.63	144	2.48354
GE1A	1.33	2021	2021-03	0.234051	0.47534	0.15956	0.0583106	0.0397917	0.00648266	0.0174681	0.559239	0.0770912	0.569431	0.21644	0.318585	0.652026	0.541633	1.59016	22	12.3033	1.69601	12.5275	4.76168	7.00887	995.135	484	2.05606
LC1A	2.6	2022	2022-03	0.20376	0.113696	0.0967145	0.0130702	0.0207284	0.0273116	0.0272528	0	0.56394	0.414035	1	0.814223	0.652	0.736173	3.10856	11	0	6.20333	4.55438	11	8.95646	330.682	121	2.73291
CB19	1.06	2022	2022-09	0.581834	0.324502	0.168595	0.0392628	0.0885956	0.110154	0.132923	0	0.279621	0.331535	0.0129309	0.571214	0.651914	0.582083	1.26731	21	0	5.87204	6.96223	0.271548	11.9955	962.807	441	2.18324
IB33	3.5	2021	2021-06	0.193545	0.242481	0.110626	0.0615397	0.0632326	0.0430713	0.0367732	0.541428	0.412615	0.289879	0.722267	0.286234	0.651638	0.46012	4.18422	21	11.37	8.66491	6.08746	15.1676	6.01091	1189.67	441	2.69767
RU23	0.4	2022	2022-05	0.23302	0.0274657	0.54509	0.0198606	0.0239766	0.390138	0.512717	0.245228	0	1	0.375801	0	0.651635	0.695445	0.478196	11	2.69751	0	11	4.13381	0	277.145	121	2.29045
FR4B	0.38	2021	2021-01	0.25918	0.106566	0.282922	0.0765132	0.0996804	0.38383	0.305796	0.135367	0.992025	0.392734	0.74504	1	0.651571	0.712815	0.454279	12	1.62441	11.9043	4.71281	8.94048	12	362.648	144	2.51839
ER11	1.09	2021	2021-03	0.481826	0.0998867	0.242101	0.0256937	0.0529159	0.334505	0.437149	0.0438665	0.501224	0.206411	0	0.588184	0.651512	0.459877	1.30304	23	1.00893	11.5282	4.74744	0	13.5282	1462.4	529	2.76446
LD19	1.92	2022	2022-08	0.270098	0.39059	0.234177	0.0400341	0.0314576	0.0510294	0.0520886	0.652733	0.252851	0.659617	0.17885	0.314411	0.651378	0.628429	2.29519	21	13.7074	5.30988	13.852	3.75586	6.60264	854.077	441	1.93668
ET1B	0.69	2021	2021-09	0.368493	0	0.603887	0	0.145489	0.10916	0.182972	0	0.211902	0.0162874	1	0.0877053	0.651377	0.657358	0.824835	12	0	2.54282	0.195448	12	1.05246	272.691	144	1.89369
JU15	0.36	2021	2021-03	0.161418	0.130045	0.620168	0.0568973	0.220975	0.103129	0.116215	0	0.454281	1	0	0	0.651349	0.669611	0.430346	12	0	5.45137	12	0	0	428.343	144	2.9746
BR23	0.61	2021	2021-09	0.320206	0.030646	0.419558	0.144645	0.136941	0.149444	0.177379	0.306426	0.156669	0.265391	0.267056	0.63383	0.65117	0.542907	0.729164	23	7.0478	3.60339	6.10399	6.14228	14.5781	1127.41	529	2.1312
RS11	4	2021	2021-05	0.19625	0.00219228	0.326769	0.0921004	0.110087	0.202704	0.144228	0.286331	0.856545	1	0.843947	0.370866	0.65115	0.688038	4.78138	12	3.43597	10.2785	12	10.1274	4.4504	394.095	144	2.73677
KD19	2.42	2021	2021-08	0.200505	0.601647	0.238239	0.015461	0.0503618	0.0055201	0.0174265	0	0.05351	0.452825	0.00881809	0.28135	0.650897	0.572877	2.89255	21	0	1.12371	9.50932	0.18518	5.90836	1034.8	441	2.34649
BY31	1.3	2022	2022-01	0.0441917	0	0.0767342	0.922651	0.841067	0.0215534	0.115014	0.975476	0	0.767516	1	0.512608	0.650656	0.685226	1.55376	11	10.7302	0	8.44268	11	5.63869	361.246	121	2.98551
FZ13	0.57	2022	2022-03	0.291561	0	0.34367	0.253576	0.087523	0.177693	0.153003	1	0.369656	0.749001	1	0.94904	0.6499	0.664246	0.681133	11	11	4.06621	8.23901	11	10.4394	296.868	121	2.45346
RC19	4.5	2022	2022-08	0.696834	0	0.28924	0.00451153	0.00941406	0.058716	0.116275	0.170684	0.09888	0.632136	1	0.0154022	0.649549	0.673693	5.37689	11	1.87752	1.08768	6.9535	11	0.169425	309.115	121	2.55467
ES25	0.31	2022	2022-02	0.275787	0.0143925	0.413683	0.0911986	0.108724	0.221623	0.184974	0.453868	0.77791	0.524989	0.275113	0.294431	0.649498	0.493476	0.370403	22	9.9851	17.114	11.5498	6.05249	6.47748	1295.21	484	2.67605
IG15	0.76	2022	2022-01	0.227491	0.515263	0.201927	0.082523	0.108034	0.0282005	0.0403671	0.173785	0.232268	0.597701	0.272388	0.474755	0.649422	0.594168	0.908068	20	3.4757	4.64537	11.954	5.44776	9.4951	794.489	400	1.98622
HS21	1.58	2021	2021-05	0.409459	0.0421913	0.319152	0.0366266	0.0350051	0.182642	0.225783	0.432642	0.273872	0.534108	0.388873	0.389187	0.64941	0.502306	1.88782	23	9.95078	6.29906	12.2845	8.94408	8.9513	1292.2	529	2.44273
HS21	1.58	2021	2021-08	0.441496	0.0294248	0.343188	0.0292465	0.0350051	0.139271	0.225783	0.335058	0.0696844	0.305061	0.573791	0.265524	0.64939	0.502306	1.88781	23	7.70633	1.60274	7.01639	13.1972	6.10706	1292.2	529	2.44273
BT23	0.88	2022	2022-05	0.327048	0	0.169011	0.501827	0.314416	0.0587311	0.121433	0.699116	0	0.60753	1	0.774841	0.64908	0.673455	1.05136	11	7.69028	0	6.68283	11	8.52325	345.886	121	2.85856
IC29	6	2022	2022-10	0.231994	0.309418	0.118064	0.0593243	0.0519153	0.0595033	0.024206	0.410365	1	0	0.00838328	0.450491	0.648805	0.439962	7.16785	21	8.61766	21	0	0.176049	9.4603	1111.11	441	2.51953
BT23	0.88	2022	2022-04	0.313809	0.000916769	0.503378	0.117188	0.314416	0.101081	0.121433	0	0.274214	0.665015	0.959497	0	0.648516	0.673455	1.05121	11	0	3.01636	7.31517	10.5545	0	345.886	121	2.85856
BZ15	0.3	2021	2021-10	0.227917	0.0194921	0.227135	0.453738	0.49317	0.228311	0.173539	0.451259	0.627556	0.231557	0.0918142	0.70192	0.648397	0.40852	0.358356	22	9.9277	13.8062	5.09425	2.01991	15.4422	1397.01	484	2.88638
XJ1B	0.43	2021	2021-03	0.381478	0.330436	0.209732	0.0255688	0.0155488	0.0210627	0.0794125	0.463833	0	0.013174	0.453955	0.611165	0.64837	0.536699	0.51364	20	9.27667	0	0.263481	9.0791	12.2233	881.264	400	2.20316
IG15	0.76	2021	2021-09	0.299914	0.597175	0.16255	0.0524841	0.108034	0.0431706	0.0403671	0.110526	0.355567	0.239779	0	0.744692	0.648259	0.594168	0.907803	20	2.21052	7.11133	4.79558	0	14.8938	794.489	400	1.98622
FU21	0.67	2021	2021-04	0.266315	0.0597149	0.295068	0.0486152	0.0820816	0.198301	0.271951	0.192972	0	0.628763	0.1815	1	0.647797	0.691853	0.800207	11	2.12269	0	6.9164	1.9965	11	301.693	121	2.49333
JJ15	0.49	2021	2021-05	0.196152	0.580866	0.303537	0.0830796	0.0702909	0.00096062	0.024715	0.516212	0.0127845	0.49469	0.136851	0.441024	0.647697	0.519894	0.585211	22	11.3567	0.281259	10.8832	3.01073	9.70254	1123.01	484	2.32026
DT1A	0.4	2021	2021-02	0.248261	0	0.473954	0.0501178	0.10346	0.183496	0.190194	0.180388	0.341749	0.714393	1	0.420824	0.647426	0.641072	0.477691	12	2.16465	4.10099	8.57272	12	5.04989	401.159	144	2.78583
BZ11	1.46	2021	2021-06	0.258263	0.0284485	0.284012	0.325527	0.517339	0.198162	0.156069	0.161807	0.845376	0.196098	0.3846	0.278406	0.647354	0.400378	1.74354	23	3.72157	19.4436	4.51025	8.84579	6.40334	1526.56	529	2.88575
FW21	0.8	2021	2021-06	0.302355	0.524847	0.23347	0.0376638	0.0769756	0.0293485	0.186925	0.138224	0.0136572	0.627432	0	0.845155	0.647342	0.633574	0.955362	12	1.65869	0.163887	7.52919	0	10.1419	387.787	144	2.69297
BJ1B	1.09	2021	2021-05	0.289225	0.715033	0.306346	0	0.284251	0	0.100056	0	0	0.49447	0	0	0.647329	0.48682	1.30168	19	0	0	9.39493	0	0	1142.01	361	3.16345
LZ1B	0.3	2021	2021-09	0.226179	0.11861	0.504892	0.0281773	0.101848	0.0659637	0.116296	0.00547047	0.22683	0.882967	0.601577	0.0587445	0.646599	0.680504	0.358194	12	0.0656456	2.72196	10.5956	7.21893	0.704934	362.611	144	2.51813
IG13	1.2	2022	2022-10	0.159425	0.281971	0.141599	0.393671	0.252028	0.0196178	0.0668449	0.648035	0.101006	0.905655	0.564034	0.992868	0.646539	0.697405	1.43275	11	7.12839	1.11107	9.9622	6.20437	10.9215	303.308	121	2.50668
NR1B	0.6	2021	2021-02	0.205799	0.274773	0.28342	0.0140838	0.0515262	0.448027	0.374652	0.0106334	0.759164	1	0.143633	0.676755	0.646436	0.694285	0.716358	12	0.127601	9.10997	12	1.72359	8.12107	383.42	144	2.66264
GW15	0.29	2022	2022-02	0.350796	0.223809	0.406713	0.100946	0.0871367	0.0393443	0.0925347	0.542473	0.121866	0.0564926	0.310412	0.634532	0.646297	0.564554	0.346228	23	12.4769	2.80291	1.29933	7.13947	14.5942	1170.16	529	2.21202
EJ11	1.5	2022	2022-05	0.217389	0.0445251	0.681268	0.0411051	0.0691882	0.084984	0.173798	0.00345445	0.147867	1	0	0	0.646186	0.696983	1.79078	11	0.037999	1.62653	11	0	0	257.543	121	2.12845
MB19	2.52	2021	2021-03	0.288084	0.335274	0.252409	0.0196031	0.0322193	0.0875938	0.0486278	0.0361416	1	0.0181382	0.0881091	0.173457	0.646184	0.52011	3.00852	21	0.758974	21	0.380902	1.85029	3.64259	986.285	441	2.23647
JU15	0.36	2021	2021-02	0.331585	0	0.451434	0.226292	0.220975	0	0.116215	0.401071	0	0.583697	1	0.388483	0.646129	0.669611	0.429782	12	4.81285	0	7.00436	12	4.66179	428.343	144	2.9746
DT1A	0.4	2021	2021-10	0.252029	0	0.35445	0.17496	0.10346	0.305986	0.190194	0.629729	1	0.698758	1	0.824023	0.645322	0.641072	0.477439	12	7.55674	12	8.3851	12	9.88827	401.159	144	2.78583
GW1A	0.5	2021	2021-06	0.259928	0.197262	0.473692	0.100221	0.103302	0.10955	0.112428	0.362051	0.406544	0.61382	0.247426	0.387538	0.645038	0.595493	0.596756	23	8.32717	9.35052	14.1179	5.69079	8.91338	1112.54	529	2.10311
GE15	1	2022	2022-07	0.229603	0.570176	0.114915	0.0378716	0.0377298	0.00241947	0.00544909	0.441483	0.109496	0.425647	0.143493	0.605435	0.64487	0.529763	1.19346	22	9.71263	2.4089	9.36424	3.15685	13.3196	1079.83	484	2.23106
GW1A	0.5	2022	2022-03	0.310935	0.214554	0.436548	0.126589	0.103302	0.0737864	0.112428	0.581822	0.121221	0.283369	0.158581	0.618858	0.644468	0.595493	0.59667	23	13.3819	2.78808	6.5175	3.64736	14.2337	1112.54	529	2.10311
RE15	0.8	2022	2022-11	0.501912	0	0.378336	0.00441104	0.0164811	0.310184	0.423205	0	0.0693224	0.383574	1	0	0.644397	0.714261	0.954655	11	0	0.762547	4.21931	11	0	313.253	121	2.58887
TT19	0.63	2021	2021-02	0.123597	0.0425097	0.348654	0.208724	0.315997	0.323697	0.307573	0.179307	0.682794	0.525984	0	0.345489	0.644137	0.47371	0.751742	23	4.12407	15.7043	12.0976	0	7.94624	1418.39	529	2.68126
LU1A	0.58	2021	2021-07	0.311166	0.0922679	0.452245	0.0613026	0.0785105	0.110878	0.154108	0.401115	0.140006	0.201548	0.345238	0.635504	0.64409	0.438181	0.692072	23	9.22564	3.22014	4.63561	7.94046	14.6166	1417.26	529	2.67913
LR1B	0.77	2021	2021-12	0.186166	0.00939735	0.460687	0.0807647	0.111484	0.31788	0.311279	0.231553	0.531628	0.270216	0.592156	0.369869	0.643812	0.504571	0.918721	23	5.32573	12.2274	6.21498	13.6196	8.50698	1340.96	529	2.53489
DD29	1.45	2021	2021-10	0.258937	0.54278	0.231144	0.0313055	0.0269961	0.0593714	0.056337	0.367129	0.278615	0.441061	0.289888	0.666826	0.643759	0.56314	1.73004	21	7.7097	5.85091	9.26227	6.08764	14.0033	914.823	441	2.07443
GU21	0.75	2021	2021-02	0.251347	0.229428	0.467014	0.0123492	0.106704	0.0189955	0.0950602	0	0	0.823928	0	0.439773	0.643319	0.690131	0.894747	12	0	0	9.88714	0	5.27727	318.674	144	2.21302
FR41	0.75	2021	2021-08	0.225354	0.421668	0.286226	0.0716979	0.133241	0.109709	0.257391	0.0391953	0.136212	0.725387	0	0.832903	0.643208	0.691114	0.894722	12	0.470344	1.63455	8.70464	0	9.99484	387.709	144	2.69243
RS11	4	2021	2021-04	0.257798	0.00171361	0.276996	0.160656	0.110087	0.0499176	0.144228	0.810798	0	0.702175	0.87802	0.659251	0.643021	0.688038	4.77163	12	9.72957	0	8.4261	10.5362	7.91102	394.095	144	2.73677
CB19	1.06	2022	2022-05	0.593218	0.232744	0.171107	0.0783965	0.0885956	0.156313	0.132923	0.249244	0.653693	0.230403	0.564719	0.521862	0.642947	0.582083	1.26446	21	5.23413	13.7275	4.83847	11.8591	10.9591	962.807	441	2.18324
QS31	2	2022	2022-02	0.151338	0	0.439214	0.115188	0.127668	0.131871	0.133124	0.177466	0.550078	1	1	0.0907995	0.64274	0.69399	2.38564	11	1.95212	6.05085	11	11	0.998795	295.485	121	2.44203
GW1A	0.5	2021	2021-10	0.267436	0.220357	0.470545	0.0888515	0.103302	0.136085	0.112428	0.267288	0.618238	0.565179	0.128764	0.407136	0.642203	0.595493	0.59633	23	6.14762	14.2195	12.9991	2.96157	9.36414	1112.54	529	2.10311
GW15	0.29	2021	2021-09	0.277092	0.247769	0.436473	0.0950468	0.0871367	0.0991192	0.0925347	0.510772	0.389285	0.515336	0.236588	0.519659	0.642107	0.564554	0.345863	23	11.7478	8.95355	11.8527	5.44152	11.9522	1170.16	529	2.21202
NR1B	0.6	2021	2021-08	0.277647	0	0.468324	0.0201629	0.0515262	0.502543	0.374652	0.0599577	0.878048	0.745347	1	0.0548519	0.641975	0.694285	0.715556	12	0.719493	10.5366	8.94416	12	0.658223	383.42	144	2.66264
LJ15	0.37	2021	2021-10	0.316984	0.285974	0.207504	0.0181278	0.0190406	0.0704968	0.0581608	0.328326	0.421746	0.373421	0.451448	0.6381	0.641293	0.54525	0.441183	21	6.89485	8.85667	7.84183	9.48041	13.4001	998.851	441	2.26497
GE1A	1.33	2022	2022-03	0.288294	0.461607	0.140063	0.034612	0.0397917	0.00439517	0.0174681	0.267173	0.052267	0.324811	0.29479	0.592294	0.641163	0.541633	1.58582	22	5.87781	1.14987	7.14584	6.48538	13.0305	995.135	484	2.05606
FT39	0.69	2022	2022-03	0.174687	0	0.700521	0.14852	0.150289	0	0.217892	0.450443	0	1	1	0	0.641132	0.728031	0.822714	10	4.50443	0	10	10	0	295.51	100	2.9551
HC3B	2.1	2021	2021-03	0.243105	0.299165	0.229926	0.0661088	0.0561504	0.00847214	0.0136239	0.823269	0.143047	0.465524	0.237425	0	0.640898	0.533606	2.50377	23	18.9352	3.29009	10.707	5.46078	0	1284.73	529	2.4286
RU25	0.3	2022	2022-02	0.0634114	0	0.715085	0.025901	0.0311818	0.52893	0.518124	0.189632	0.43558	0.974521	1	0	0.640818	0.681223	0.357674	11	2.08595	4.79138	10.7197	11	0	300.845	121	2.48632
GU21	0.75	2021	2021-10	0.237461	0	0.449718	0.225908	0.106704	0.146839	0.0950602	1	0.417504	0.905494	1	0.494308	0.640244	0.690131	0.894055	12	12	5.01005	10.8659	12	5.93169	318.674	144	2.21302
FR41	0.75	2021	2021-04	0.175726	0.178258	0.387234	0.0688802	0.133241	0.42572	0.257391	0.0266368	1	1	0.577255	0.461336	0.639923	0.691114	0.893983	12	0.319641	12	12	6.92705	5.53603	387.709	144	2.69243
FW21	0.8	2021	2021-11	0.272773	0.189083	0.210267	0.0358672	0.0769756	0.213221	0.186925	0.13067	0.264124	0.67718	0.639737	0.911495	0.639788	0.633574	0.953549	12	1.56803	3.16949	8.12616	7.67684	10.9379	387.787	144	2.69297
NE19	1.16	2022	2022-10	0.27808	0.649756	0.150892	0.0530594	0.0773797	0.0174392	0.0408401	0	0	0.497559	0	1	0.63949	0.742769	1.38254	11	0	0	5.47315	0	11	331.604	121	2.74053
FR41	0.75	2021	2021-03	0.181763	0.276813	0.29612	0.160799	0.133241	0.0820923	0.257391	0.436325	0.0607259	0.966593	0.343529	0.796507	0.639487	0.691114	0.893885	12	5.2359	0.728711	11.5991	4.12235	9.55808	387.709	144	2.69243
EJ11	1.5	2022	2022-01	0.344707	0.00114261	0.288736	0.0827058	0.0691882	0.0602989	0.173798	0.359505	0.0914458	0.131256	1	1	0.639487	0.696983	1.78777	11	3.95455	1.0059	1.44382	11	11	257.543	121	2.12845
ET1B	0.69	2021	2021-05	0.30456	0	0.628087	0.0416267	0.145489	0.0181282	0.182972	0.042125	0	0.202465	1	0.0472843	0.638959	0.657358	0.822265	12	0.5055	0	2.42958	12	0.567412	272.691	144	1.89369
LX13	0.4	2021	2021-04	0.334609	0.106289	0.512114	0.00412761	0.0130724	0.144076	0.106496	0.0747091	0.286401	0.495498	0.157454	0.483064	0.638767	0.44718	0.476652	23	1.71831	6.58721	11.3964	3.62145	11.1105	1192.21	529	2.2537
FU21	0.67	2021	2021-01	0.129106	0	0.39351	0.0383964	0.0820816	0.413345	0.271951	0.139881	1	1	1	0.157806	0.638625	0.691853	0.798364	11	1.53869	11	11	11	1.73587	301.693	121	2.49333
HJ19	3.04	2022	2022-08	0.334801	0.179393	0.213482	0.0216162	0.0274378	0.171789	0.198692	0.207909	0.296131	1	0.0786581	1	0.638621	0.717283	3.62242	11	2.287	3.25744	11	0.865239	11	315.083	121	2.60399
GD19	1.7	2022	2022-02	0.342152	0.330221	0.107173	0.0188938	0.0538944	0	0.00651137	0	0	0.0801744	0.883935	0.749589	0.638296	0.71975	2.02553	11	0	0	0.881919	9.72329	8.24547	328.788	121	2.71726
CB39	0.84	2022	2022-11	0.0985164	1	0.196866	0.0101453	0.01971	0.0340999	0.0396785	0.0773491	0.230041	0.605869	0	0.431369	0.637209	0.518513	1.00058	21	1.62433	4.83085	12.7233	0	9.05876	911.358	441	2.06657
LF19	1.65	2021	2021-03	0.146326	0.638082	0.292779	0.0309471	0.0652014	0.0432049	0.0706643	0.164703	0.108851	0.641232	0.0421532	0.36409	0.637152	0.507166	1.96539	21	3.45875	2.28588	13.4659	0.885217	7.64589	1159.26	441	2.62871
EX25	0.38	2021	2021-09	0.221826	0.0528172	0.437922	0.0631942	0.11617	0.149591	0.15971	0.0888202	0.475452	0.520171	0	0.523311	0.637009	0.377875	0.452619	22	1.95405	10.4599	11.4438	0	11.5128	1399.31	484	2.89115
GU25	0.48	2022	2022-07	0.239036	0.213764	0.54624	0.0986158	0.125924	0.0198194	0.089466	0.0537084	0	1	0.499733	0	0.636977	0.707923	0.571725	11	0.590793	0	11	5.49707	0	270.535	121	2.23583
KT13	0.55	2021	2021-10	0.301172	0.103124	0.454067	0.113791	0.114696	0.16327	0.237626	0.396569	0.334227	0.249919	0	0.7405	0.636851	0.440505	0.65508	23	9.12109	7.68723	5.74813	0	17.0315	1458.13	529	2.75639
JU15	0.36	2021	2021-07	0.370806	0	0.185827	0.30769	0.220975	0.0930593	0.116215	0.593793	0.409926	0.487747	1	1	0.636805	0.669611	0.428775	12	7.12552	4.91911	5.85297	12	12	428.343	144	2.9746
CB19	1.06	2022	2022-02	0.554112	0.235381	0.19726	0.0796539	0.0885956	0.145461	0.132923	0.257253	0.56575	0.577806	0.548861	0.00813919	0.636579	0.582083	1.26243	21	5.40231	11.8807	12.1339	11.5261	0.170923	962.807	441	2.18324
IH1B	0.84	2022	2022-05	0.192006	0.28328	0.0938088	0.0532539	0.410856	0.0111018	0.095611	0	0.0609711	0.658588	0.209596	1	0.636424	0.693372	1.00038	11	0	0.670682	7.24447	2.30556	11	357.033	121	2.95068
FZ13	0.57	2022	2022-09	0.403707	0	0.361239	0.0388408	0.087523	0.113329	0.153003	0.0767848	0.157366	0.0882471	1	0.880119	0.636091	0.664246	0.678772	11	0.844633	1.73103	0.970718	11	9.68131	296.868	121	2.45346
QS31	2	2022	2022-03	0.240244	0	0.352272	0.092427	0.127668	0.0525003	0.133124	0.0350143	0	0.503974	1	0.399361	0.636002	0.69399	2.3816	11	0.385157	0	5.54371	11	4.39297	295.485	121	2.44203
KT15	0.43	2022	2022-08	0.165272	0.0731332	0.593007	0.0940765	0.128678	0.126487	0.20209	0.353852	0.0460346	0.473835	0.366752	0.39643	0.635877	0.517606	0.512028	23	8.1386	1.0588	10.8982	8.4353	9.11789	1314	529	2.48393
DT1A	0.4	2021	2021-12	0.1802	0	0.539705	0.105967	0.10346	0.277707	0.190194	0.381403	0.848032	0.996791	1	0.198984	0.635857	0.641072	0.476303	12	4.57683	10.1764	11.9615	12	2.3878	401.159	144	2.78583
RE13	1	2022	2022-03	0.516049	0.0002584	0.242253	0.015194	0.0266549	0.531844	0.409508	0	1	0.428033	0.99709	0.922658	0.635806	0.721825	1.19074	11	0	11	4.70836	10.968	10.1492	334.219	121	2.76214
NR1B	0.6	2021	2021-03	0.25733	0.320859	0.289512	0.0127733	0.0515262	0.0999038	0.374652	0	0	0.817356	0	0.656267	0.635446	0.694285	0.71438	12	0	0	9.80827	0	7.87521	383.42	144	2.66264
GW1A	0.5	2021	2021-05	0.257809	0.207048	0.471514	0.111695	0.103302	0.0908652	0.112428	0.457687	0.257475	0.627545	0.197147	0.401103	0.635195	0.595493	0.595279	23	10.5268	5.92193	14.4335	4.53437	9.22538	1112.54	529	2.10311
DT1A	0.4	2021	2021-03	0.227744	0.153388	0.302293	0.277834	0.10346	0.119902	0.190194	1	0	0.799521	0	1	0.635153	0.641072	0.476218	12	12	0	9.59425	0	12	401.159	144	2.78583
IF49	3	2022	2022-05	0.177821	0.327191	0.147683	0.0680365	0.0379185	0.0717211	0.0643597	0.77838	0.538543	0.662175	0.292968	0.128243	0.634708	0.533905	3.57124	21	16.346	11.3094	13.9057	6.15232	2.6931	1088.59	441	2.46847
RU25	0.3	2022	2022-01	0.32209	0	0.256285	0.00269881	0.0311818	1	0.518124	0	1	0.200693	1	1	0.634609	0.681223	0.357115	11	0	11	2.20762	11	11	300.845	121	2.48632
BZ11	1.46	2021	2021-04	0.220402	0.0462276	0.363127	0.272363	0.517339	0.206847	0.156069	0.0703747	0.909488	0.372632	0	0.0327318	0.634517	0.400378	1.73792	23	1.61862	20.9182	8.57053	0	0.752831	1526.56	529	2.88575
ES25	0.31	2021	2021-09	0.318588	0.00717677	0.401693	0.111785	0.108724	0.202325	0.184974	0.556318	0.644091	0.0954055	0.638537	0.409816	0.633835	0.493476	0.368947	22	12.239	14.17	2.09892	14.0478	9.01596	1295.21	484	2.67605
LC15	2.13	2022	2022-11	0.145444	0.147056	0.087961	0.0389528	0.0323338	0.0176608	0.0342939	0.554601	0	1	0.375481	0.961156	0.633386	0.72076	2.53473	11	6.10061	0	11	4.13029	10.5727	312.614	121	2.58359
GF19	1.07	2021	2021-10	0.257583	0.361419	0.147779	0.249771	0.238903	0.138734	0.130518	0.623778	0.65363	0.0931049	0.512418	0.459146	0.632919	0.515295	1.27317	23	14.3469	15.0335	2.14141	11.7856	10.5604	1390.14	529	2.62786
JB25	0.95	2022	2022-06	0.0630285	0.337801	0.284115	0.0319502	0.0627989	0.0801075	0.116619	0	0.0774849	0.666111	1	0.184484	0.632863	0.701777	1.13037	11	0	0.852334	7.32722	11	2.02933	251.888	121	2.08172
BR25	0.2	2021	2021-08	0.338133	0.0122537	0.465604	0.128675	0.173356	0.126532	0.188717	0.219984	0.155428	0.0835057	0.669049	0.312207	0.632434	0.520874	0.237946	23	5.05963	3.57484	1.92063	15.3881	7.18076	1199.12	529	2.26677
CB19	1.06	2022	2022-07	0.563532	0.326652	0.17664	0.0445207	0.0885956	0.0756503	0.132923	0.0334877	0	0.494121	0	0.413174	0.632029	0.582083	1.26099	21	0.703241	0	10.3765	0	8.67665	962.807	441	2.18324
GF19	1.07	2021	2021-01	0.267649	0.318531	0.164792	0.213069	0.238903	0.126512	0.130518	0.338008	0.496001	0	0.737343	0.217875	0.631891	0.515295	1.27284	23	7.77418	11.408	0	16.9589	5.01112	1390.14	529	2.62786
JV29	0.39	2021	2021-03	0.157949	0.0986951	0.563241	0.0642464	0.145205	0.181485	0.330717	0.0687726	0	1	0.428511	0	0.631665	0.684766	0.463905	12	0.825271	0	12	5.14213	0	393.117	144	2.72998
FN19	6.1	2022	2022-08	0.0808063	0.236928	0.0754852	0.0128266	0.0196552	0.0241623	0.0327908	0.195482	0.297599	0.943831	1	0.473697	0.63158	0.736295	7.25579	11	2.1503	3.27359	10.3821	11	5.21066	305.838	121	2.52758
FW21	0.8	2021	2021-12	0.36544	0.0622184	0.186004	0.110745	0.0769756	0.151802	0.186925	0.445506	0.180461	0.521343	0.881454	0.980865	0.631365	0.633574	0.951528	12	5.34607	2.16553	6.25611	10.5775	11.7704	387.787	144	2.69297
EX2A	0.54	2021	2021-04	0.407645	0	0.356075	0.150374	0.0793591	0.140505	0.22915	1	0.183302	0	1	1	0.631159	0.674885	0.642248	12	12	2.19963	0	12	12	412.021	144	2.86126
JJ15	0.49	2021	2021-06	0.205855	0.481662	0.312397	0.0424472	0.0702909	0.00351255	0.024715	0.221146	0.0467471	0.440216	0.451146	0.384838	0.63097	0.519894	0.582753	22	4.86521	1.02844	9.68476	9.92522	8.46643	1123.01	484	2.32026
EV1A	0.38	2021	2021-01	0.246136	0	0.484494	0.0295195	0.0861792	0.213144	0.175046	0	0.701831	0.586482	1	0.666224	0.630271	0.702932	0.451851	12	0	8.42197	7.03778	12	7.99469	429.749	144	2.98437
EV1A	0.38	2021	2021-08	0.128793	0.0226242	0.591317	0.144972	0.0861792	0.0196241	0.175046	1	0.0646176	0.947882	0.82093	0.469388	0.630196	0.702932	0.451842	12	12	0.775411	11.3746	9.85116	5.63265	429.749	144	2.98437
FW21	0.8	2021	2021-05	0.306469	0.165046	0.180817	0.0709357	0.0769756	0.119468	0.186925	0.278122	0.136416	0.620513	0.685535	0.995693	0.629668	0.633574	0.95112	12	3.33746	1.63699	7.44616	8.22642	11.9483	387.787	144	2.69297
IT2B	0.8	2021	2021-04	0.179478	0.0125723	0.616036	0.14405	0.462315	0.171416	0.145523	0	0.660572	0.461801	0.379763	0	0.62966	0.436286	0.951119	23	0	15.1931	10.6214	8.73456	0	1529.1	529	2.89054
HS21	1.58	2021	2021-10	0.432131	0.0458825	0.272959	0.0353753	0.0350051	0.183206	0.225783	0.416097	0.276526	0.372017	0.335407	0.626851	0.629582	0.502306	1.87842	23	9.57023	6.36011	8.55639	7.71435	14.4176	1292.2	529	2.44273
IJ1B	0.81	2021	2021-04	0.286444	0.304768	0.144628	0.144825	0.215286	0.0470284	0.0726381	0.246938	0.153512	0	0.403965	0.727298	0.629527	0.477843	0.962975	21	5.1857	3.22374	0	8.48327	15.2733	1100.29	441	2.49498
GD19	1.7	2022	2022-01	0.219459	0.326413	0.200022	0.0468281	0.0538944	0	0.00651137	0.501104	0	1	0.968688	0	0.629181	0.71975	2.02088	11	5.51214	0	11	10.6556	0	328.788	121	2.71726
KT15	0.43	2021	2021-05	0.15112	0.111746	0.561428	0.122035	0.128678	0.218014	0.20209	0.546831	0.430038	0.58015	0.0324118	0.510822	0.629079	0.517606	0.511151	23	12.5771	9.89088	13.3434	0.745472	11.7489	1314	529	2.48393
CB39	0.84	2022	2022-10	0.093433	0.991002	0.21337	0.0144889	0.01971	0.010874	0.0396785	0.120025	0.0550721	0.664405	0.0194861	0.285326	0.629039	0.518513	0.998518	21	2.52053	1.15651	13.9525	0.409209	5.99185	911.358	441	2.06657
IC39	2.6	2022	2022-01	0.166929	0.410304	0.10737	0.096746	0.0804234	0.0310477	0.0439479	0.650903	0.219563	0.616708	0.186112	0.507492	0.628811	0.526481	3.09047	21	13.669	4.61083	12.9509	3.90834	10.6573	1096.2	441	2.48571
BJ1B	1.09	2022	2022-01	0.230789	0.436055	0.191142	0.206326	0.284251	0.0632611	0.100056	0.464622	0.366487	0.663132	0.526194	0.45823	0.628804	0.48682	1.29562	19	8.82782	6.96326	12.5995	9.99769	8.70637	1142.01	361	3.16345
JU15	0.36	2021	2021-12	0.418801	0	0.198851	0.170936	0.220975	0.227015	0.116215	0.270005	1	0.37033	1	0.970014	0.628735	0.669611	0.427903	12	3.24006	12	4.44396	12	11.6402	428.343	144	2.9746
NR1B	0.6	2021	2021-04	0.233631	0	0.312327	0.13602	0.0515262	0.558465	0.374652	1	1	0.901353	1	0.579531	0.628531	0.694285	0.713135	12	12	12	10.8162	12	6.95437	383.42	144	2.66264
BR23	0.61	2021	2021-07	0.291974	0.0324609	0.469328	0.146502	0.136941	0.133838	0.177379	0.318985	0	0.565086	0.22365	0.348303	0.628481	0.542907	0.725012	23	7.33665	0	12.997	5.14394	8.01097	1127.41	529	2.1312
FF31	3.15	2022	2022-03	0.0324145	0.240232	0.0498394	0.017205	0.0404363	0.02936	0.0325161	0.0336147	0.555537	1	0.418102	1	0.628382	0.73711	3.74382	11	0.369762	6.1109	11	4.59912	11	320.42	121	2.6481
IG15	0.76	2022	2022-07	0.215344	0.436311	0.263119	0.0986829	0.108034	0.0311535	0.0403671	0.207816	0.256591	0.657732	0.534936	0.0552729	0.628277	0.594168	0.903247	20	4.15632	5.13181	13.1546	10.6987	1.10546	794.489	400	1.98622
ES23	0.59	2021	2021-03	0.339255	0.0334043	0.471056	0.0644541	0.0840708	0.154224	0.204605	0.4089	0.106055	0.569709	0	0.492348	0.627775	0.400598	0.701116	23	9.40469	2.43926	13.1033	0	11.324	1556.54	529	2.94243
FN2B	1.16	2022	2022-01	0.168864	0.1376	0.180298	0.00385824	0.0378349	0.125303	0.065923	0	0.97409	1	0.515157	0.928405	0.627285	0.703258	1.3783	11	0	10.715	11	5.66673	10.2124	272.949	121	2.25578
KD19	2.42	2021	2021-09	0.21027	0.555986	0.225155	0.0690824	0.0503618	0.0114246	0.0174265	0.903864	0.19467	0.373301	0.33714	0.483948	0.627054	0.572877	2.87524	21	18.9811	4.08807	7.83933	7.07994	10.1629	1034.8	441	2.34649
FW21	0.8	2021	2021-02	0.675449	0	0.190608	0.137246	0.0769756	0.0554404	0.186925	0.556935	0.049199	0	1	0.967701	0.627035	0.633574	0.950488	12	6.68322	0.590388	0	12	11.6124	387.787	144	2.69297
FN19	6.1	2022	2022-03	0.0755792	0.372927	0.0703289	0.00841302	0.0196552	0.0105058	0.0327908	0	0	1	0.450773	0.572541	0.626924	0.736295	7.24727	11	0	0	11	4.9585	6.29795	305.838	121	2.52758
HR11	1.15	2021	2021-09	0.42447	0.123308	0.254449	0.0263042	0.0311706	0.300219	0.350234	0.296332	0.301179	0.673843	0.0578795	0.406145	0.626761	0.453473	1.36623	23	6.81563	6.92711	15.4984	1.33123	9.34133	1352.27	529	2.55627
RS11	4	2021	2021-03	0.365859	0	0.218186	0.0717919	0.110087	0.193849	0.144228	0.130967	0.806903	0.17928	1	1	0.626708	0.688038	4.75205	12	1.5716	9.68284	2.15136	12	12	394.095	144	2.73677
DT1A	0.4	2021	2021-09	0.179427	0.0239994	0.598682	0.0463991	0.10346	0.166379	0.190194	0.167003	0.249761	1	0.843538	0	0.626665	0.641072	0.4752	12	2.00404	2.99713	12	10.1225	0	401.159	144	2.78583
FR11	1.17	2021	2021-01	0.390874	0.0496063	0.384206	0.0602608	0.10025	0.0717571	0.217633	0.0696115	0	0.0652144	0.567664	0.284125	0.626135	0.421599	1.38977	23	1.60107	0	1.49993	13.0563	6.53488	1460.76	529	2.76136
BR21	1.15	2021	2021-05	0.332402	0.0226057	0.411039	0.0953604	0.131895	0.17091	0.206899	0.438616	0.277846	0.453336	0.556843	0.334678	0.626097	0.479396	1.366	23	10.0882	6.39047	10.4267	12.8074	7.6976	1454.44	529	2.74942
GW15	0.29	2021	2021-01	0.260197	0.240528	0.469037	0.0497999	0.0871367	0.0619132	0.0925347	0.26762	0.222833	0.620513	0.2589	0.393962	0.626047	0.564554	0.344466	23	6.15526	5.12517	14.2718	5.95469	9.06113	1170.16	529	2.21202
IF5B	0.86	2021	2021-09	0.271064	0.452829	0.204028	0.0291354	0.0275106	0.0527997	0.0374287	0.351857	0.679235	0.326449	0.735929	0	0.626046	0.517695	1.02152	21	7.38901	14.2639	6.85543	15.4545	0	1052.2	441	2.38594
BR13	1.25	2022	2022-07	0.118798	0.0241145	0.333346	0.42181	0.698179	0.167808	0.082012	0	0.602662	0.617812	0.144537	0	0.625928	0.381516	1.48472	23	0	13.8612	14.2097	3.32436	0	1454.95	529	2.75037
HS2B	0.7	2021	2021-08	0.373539	0.0477189	0.390532	0.048516	0.0463547	0.200028	0.256995	0.383244	0.297901	0.297309	0.432648	0.617461	0.625847	0.484502	0.831428	23	8.8146	6.85172	6.83811	9.95091	14.2016	1296.78	529	2.45139
JB25	0.95	2022	2022-11	0.0363551	0.388931	0.224056	0.0725272	0.0627989	0.0659014	0.116619	0.514591	9.53625e-05	1	0.569822	0.916932	0.625796	0.701777	1.12835	11	5.6605	0.00104899	11	6.26804	10.0863	251.888	121	2.08172
FM3A	0.93	2022	2022-03	0.168855	0.511866	0.208643	0.0901604	0.0507178	0.131722	0.169174	1	0	1	0.885293	0.60998	0.625394	0.700781	1.10449	11	11	0	11	9.73823	6.70978	300.498	121	2.48346
LL19	1.1	2022	2022-01	0.27359	0	0.327927	0.0697853	0.0864473	0.041152	0.0680684	0.121962	0.0927857	0	1	0.979836	0.625281	0.687178	1.30634	11	1.34158	1.02064	0	11	10.7782	278.147	121	2.29874
FU23	0.54	2021	2021-08	0.176441	0.15122	0.218657	0.04671	0.123106	0.177804	0.216492	0.0142416	0.213459	0.961708	0	1	0.625276	0.687481	0.641295	11	0.156658	2.34804	10.5788	0	11	297.293	121	2.45697
RU21	0.6	2022	2022-09	0.162341	0	0.429486	0.00350064	0.0324178	0.931332	0.526096	0	1	1	1	0.0639024	0.625159	0.688747	0.712529	11	0	11	11	11	0.702927	309.751	121	2.55992
GV11	0.99	2021	2021-01	0.151575	0	0.734411	0.0816603	0.0901187	0	0.0743726	0.456653	0	1	1	0	0.62436	0.7482	1.17543	11	5.02319	0	11	11	0	336.008	121	2.77692
BR15	0.84	2021	2021-01	0.732002	0	0.113357	0.0292033	0.476389	0.0857329	0.0802557	0	0.483256	0	#NUM!	0.823675	0.624137	0.58507	0.997283	12	0	5.79907	0	#NUM!	9.8841	358.048	144	2.48644
FW21	0.8	2021	2021-10	0.283988	0.109259	0.215769	0.0404706	0.0769756	0.193298	0.186925	0.150025	0.236986	0.658321	0.791828	0.895763	0.624005	0.633574	0.949761	12	1.8003	2.84383	7.89985	9.50194	10.7492	387.787	144	2.69297
HS3B	0.4	2021	2021-12	0.390903	0.0368251	0.451545	0.0277031	0.0662496	0.210831	0.227283	0.097427	0.497878	0.236186	0.415158	0.582083	0.623807	0.464468	0.474857	23	2.24082	11.4512	5.43227	9.54864	13.3879	1347.02	529	2.54634
DT1A	0.4	2021	2021-04	0.21078	0	0.545354	0.131072	0.10346	0.125557	0.190194	0.471764	0.0303907	0.869908	1	0.179926	0.623692	0.641072	0.474843	12	5.66117	0.364689	10.4389	12	2.15911	401.159	144	2.78583
HZ13	0.62	2022	2022-06	0.270591	0.0452986	0.455709	0.136237	0.224733	0.105413	0.156183	0.277195	0.157784	0.315113	0.47831	0.52763	0.623625	0.4508	0.735994	23	6.37548	3.62904	7.24761	11.0011	12.1355	1494.59	529	2.82532
GU21	0.75	2021	2021-12	0.221371	0	0.60649	0.178599	0.106704	0.0748872	0.0950602	0.778473	0.182528	1	1	0	0.623486	0.690131	0.890284	12	9.34168	2.19034	12	12	0	318.674	144	2.21302
TT19	0.63	2022	2022-06	0.169632	0.0252286	0.377216	0.218751	0.315997	0.363113	0.307573	0.204939	0.955923	0.19199	0.406521	0.244101	0.623306	0.47371	0.747805	23	4.71361	21.9862	4.41578	9.34998	5.61431	1418.39	529	2.68126
IZ29	0.4	2021	2021-05	0.234492	0.0315999	0.222465	0.519087	0.613022	0.0768717	0.104398	0	0.178699	0.0881586	0.444239	0.531175	0.623245	0.4865	0.474789	23	0	4.11007	2.02765	10.2175	12.217	1245.17	529	2.35381
QS31	2	2022	2022-11	0.224172	0.00134965	0.183032	0.0868325	0.127668	0.0872062	0.133124	0	0.240528	0.593645	0.796845	1	0.623112	0.69399	2.37387	11	0	2.64581	6.53009	8.7653	11	295.485	121	2.44203
BR13	1.25	2021	2021-09	0.226383	0.0281889	0.105686	0.649027	0.698179	0.0297657	0.082012	0.43221	0	0.111246	0	0.730476	0.622841	0.381516	1.48357	23	9.94083	0	2.55865	0	16.8009	1454.95	529	2.75037
IZ29	0.4	2022	2022-06	0.197918	0.043179	0.218953	0.558682	0.613022	0.126934	0.104398	0.108652	0.629766	0.390956	0.240591	0.556703	0.62277	0.4865	0.474732	23	2.499	14.4846	8.99198	5.5336	12.8042	1245.17	529	2.35381
LF19	1.65	2021	2021-05	0.152456	0.659902	0.265888	0.0324094	0.0652014	0.0911669	0.0706643	0.183063	0.466159	0.608259	0	0.606332	0.622572	0.507166	1.95817	21	3.84432	9.78934	12.7734	0	12.733	1159.26	441	2.62871
CU19	0.4	2021	2021-03	0.27822	0.0740009	0.326483	0.279189	0.269089	0.245878	0.252201	0.435325	0.333392	0.568349	0.289846	0.556478	0.62246	0.479634	0.474695	22	9.57716	7.33462	12.5037	6.37662	12.2425	1192.61	484	2.46407
IC39	2.6	2022	2022-02	0.158182	0.402312	0.132272	0.0908978	0.0804234	0.069447	0.0439479	0.581548	0.835688	0.690119	0.23275	0	0.622057	0.526481	3.0852	21	12.2125	17.5494	14.4925	4.88775	0	1096.2	441	2.48571
DT1A	0.4	2021	2021-06	0.224988	0	0.457692	0.122275	0.10346	0.132843	0.190194	0.440103	0.0695452	0.810957	1	0.475692	0.622016	0.641072	0.474642	12	5.28124	0.834542	9.73149	12	5.70831	401.159	144	2.78583
DT1A	0.4	2021	2021-01	0.193082	0	0.595858	0.03269	0.10346	0.213424	0.190194	0.11766	0.50258	0.943343	1	0.00952879	0.62184	0.641072	0.474621	12	1.41192	6.03096	11.3201	12	0.114346	401.159	144	2.78583
GR15	0.54	2021	2021-02	0.557052	0	0.234965	0.0242307	0.0524066	0.452587	0.497872	0.146031	0.338029	0	1	1	0.621325	0.710284	0.640655	12	1.75237	4.05635	0	12	12	376.036	144	2.61136
GE1A	1.33	2021	2021-04	0.242767	0.428399	0.161298	0.0418555	0.0397917	0.00515695	0.0174681	0.356444	0.061326	0.530124	0.484253	0.294179	0.621129	0.541633	1.57783	22	7.84177	1.34917	11.6627	10.6536	6.47195	995.135	484	2.05606
NS1B	0.21	2021	2021-03	0.364367	0.19418	0.290853	0.103432	0.110743	0.104802	0.10341	0.373996	0.453841	0.309912	0	0.806615	0.621061	0.425612	0.249127	22	8.22792	9.98451	6.81807	0	17.7455	1348.74	484	2.78665
KT11	0.67	2021	2021-08	0.292243	0.0562375	0.353939	0.0710879	0.109662	0.48005	0.293975	0	1	0.622753	0.699481	0.978305	0.620884	0.684715	0.794798	12	0	12	7.47304	8.39377	11.7397	424.379	144	2.94707
IF49	3	2021	2021-08	0.276771	0.258845	0.158727	0.0392886	0.0379185	0.0427873	0.0643597	0.403112	0.240331	0	0.857605	0	0.620683	0.533905	3.55861	21	8.46535	5.04696	0	18.0097	0	1088.59	441	2.46847
GW1A	0.5	2022	2022-09	0.313191	0.144292	0.457055	0.0704964	0.103302	0.0914535	0.112428	0.114303	0.262169	0.268755	0.519588	0.491147	0.62066	0.595493	0.593099	23	2.62896	6.02988	6.18137	11.9505	11.2964	1112.54	529	2.10311
XJ1B	0.43	2021	2021-09	0.339898	0.356806	0.194091	0.00427358	0.0155488	0.0756206	0.0794125	0.0284738	0.289103	0.276091	0.382276	0.701886	0.620222	0.536699	0.510009	20	0.569477	5.78205	5.52183	7.64552	14.0377	881.264	400	2.20316
LZ1B	0.3	2021	2021-04	0.193824	0.0834195	0.392424	0.0268876	0.101848	0.241443	0.116296	0	1	1	0.767825	0.411721	0.620113	0.680504	0.35581	12	0	12	12	9.2139	4.94065	362.611	144	2.51813
CU19	0.4	2022	2022-02	0.260388	0.104204	0.316868	0.294529	0.269089	0.248535	0.252201	0.476018	0.339038	0.620611	0	0.587797	0.619548	0.479634	0.474346	22	10.4724	7.45883	13.6534	0	12.9315	1192.61	484	2.46407
LD19	1.92	2022	2022-10	0.263261	0.393045	0.231568	0.0445252	0.0314576	0.0512578	0.0520886	0.776279	0.254712	0.706545	0.171293	0.328774	0.619446	0.628429	2.2768	21	16.3019	5.34895	14.8374	3.59716	6.90426	854.077	441	1.93668
FM29	3.92	2022	2022-09	0.112004	0.557592	0.064459	0.0123759	0.0249894	0.0558017	0.08127	0	0	0.798251	0.350361	1	0.619375	0.713209	4.64839	11	0	0	8.78076	3.85398	11	315.309	121	2.60586
BZ11	1.46	2021	2021-03	0.29063	0.0135816	0.373668	0.231444	0.517339	0.135245	0.156069	0	0.380914	0.0451767	0.706201	0	0.619288	0.400378	1.73125	23	0	8.76101	1.03906	16.2426	0	1526.56	529	2.88575
RS1B	1.2	2022	2022-07	0.442353	0.105478	0.298889	0.153641	0.129602	0.0830753	0.260631	0.66182	0.0200527	0.028045	0	0.712359	0.619269	0.392476	1.42294	23	15.2219	0.461212	0.645034	0	16.3842	1441.61	529	2.72516
LJ15	0.37	2021	2021-06	0.386452	0.263157	0.187513	0.0282412	0.0190406	0.0798128	0.0581608	0.511498	0.477479	0.152261	0.522642	0.708613	0.619175	0.54525	0.438728	21	10.7415	10.0271	3.19749	10.9755	14.8809	998.851	441	2.26497
KT11	0.67	2021	2021-02	0.280201	0.0404383	0.351157	0.0999256	0.109662	0.343254	0.293975	0.391115	0.63673	0.793313	0.836665	1	0.619136	0.684715	0.794446	12	4.69338	7.64076	9.51976	10.04	12	424.379	144	2.94707
ES25	0.31	2022	2022-05	0.302727	0.00592246	0.4199	0.105971	0.108724	0.205	0.184974	0.527384	0.662644	0.254601	0.701711	0.234596	0.618631	0.493476	0.367533	22	11.6025	14.5782	5.60123	15.4376	5.16112	1295.21	484	2.67605
IJ1B	0.81	2021	2021-08	0.224068	0.295249	0.172654	0.0818881	0.215286	0.0505173	0.0726381	0.120543	0.17206	0.394201	0.426311	0.576392	0.618466	0.477843	0.960287	21	2.53141	3.61326	8.27822	8.95252	12.1042	1100.29	441	2.49498
BR23	0.61	2021	2021-12	0.300501	0.0250663	0.455011	0.116935	0.136941	0.185957	0.177379	0.119023	0.523237	0.474575	0.400502	0.430441	0.618118	0.542907	0.723116	23	2.73752	12.0345	10.9152	9.21154	9.90014	1127.41	529	2.1312
CU19	0.4	2022	2022-03	0.257946	0.0669432	0.378026	0.235021	0.269089	0.172305	0.252201	0.318163	0.177075	0.627767	0.357576	0.388597	0.617886	0.479634	0.474146	22	6.99959	3.89566	13.8109	7.86668	8.54914	1192.61	484	2.46407
GD29	0.85	2021	2021-06	0.269333	0.405752	0.123462	0.0702458	0.0570351	8.36798e-06	0.00235607	0.484506	0.000825162	0.534343	0.154249	0.474171	0.617778	0.521575	1.00753	23	11.1436	0.0189787	12.2899	3.54773	10.9059	1093.28	529	2.0667
DT1A	0.4	2021	2021-05	0.184246	0.000836024	0.536698	0.0803639	0.10346	0.168437	0.190194	0.289252	0.26082	0.980005	0.99455	0.209132	0.61736	0.641072	0.474083	12	3.47102	3.12984	11.7601	11.9346	2.50958	401.159	144	2.78583
FW21	0.8	2021	2021-09	0.274593	0.0733718	0.286558	0.0262165	0.0769756	0.0799073	0.186925	0.0900914	0.0825272	0.67412	0.860204	0.693371	0.61727	0.633574	0.948145	12	1.0811	0.990326	8.08944	10.3224	8.32046	387.787	144	2.69297
LR1B	0.77	2022	2022-09	0.17779	0.0215271	0.459986	0.1352	0.111484	0.402546	0.311279	0.663902	0.926426	0.386593	0.0657266	0.373242	0.617035	0.504571	0.912535	23	15.2697	21.3078	8.89163	1.51171	8.58457	1340.96	529	2.53489
TV19	0.73	2021	2021-08	0.20539	0.00975236	0.392909	0.213162	0.336579	0.289383	0.299171	0	0.447984	0.132561	0.696889	0	0.616818	0.401133	0.865083	23	0	10.3036	3.0489	16.0284	0	1555.23	529	2.93994
IC29	6	2022	2022-11	0.139636	0.273053	0.139606	0.0802736	0.0519153	0.0210737	0.024206	0.631921	0.31034	0.775075	0.264429	0.252198	0.616766	0.439962	7.11018	21	13.2703	6.51714	16.2766	5.55301	5.29616	1111.11	441	2.51953
XJ1B	0.43	2021	2021-04	0.333017	0.32917	0.203063	0.0232443	0.0155488	0.0226698	0.0794125	0.416312	0.00851611	0.319602	0.457397	0.649847	0.616736	0.536699	0.509559	20	8.32623	0.170322	6.39204	9.14795	12.9969	881.264	400	2.20316
IF1A	3.2	2022	2022-03	0.173599	0.35892	0.133422	0.0855076	0.0504381	0.0456254	0.063177	0.879249	0.25076	0.524166	0.170215	0.530475	0.61641	0.449691	3.79175	21	18.4642	5.26597	11.0075	3.57452	11.14	1201.91	441	2.72543
HS13	1.25	2021	2021-04	0.334716	0	0.287352	0.0222696	0.0796169	0.516593	0.213053	0.0995488	1	1	1	0.592884	0.615873	0.715027	1.48095	11	1.09504	11	11	11	6.52173	307.367	121	2.54023
FW21	0.8	2021	2021-03	0.509088	0.080226	0.179311	0.0580247	0.0769756	0.0193224	0.186925	0.223835	0	0.27977	0.847144	1	0.615858	0.633574	0.947806	12	2.68602	0	3.35724	10.1657	12	387.787	144	2.69297
DD29	1.45	2021	2021-05	0.253592	0.530428	0.25131	0.0415737	0.0269961	0.0235885	0.056337	0.506489	0.00341059	0.506511	0.330312	0.53425	0.615573	0.56314	1.71777	21	10.6363	0.0716223	10.6367	6.93655	11.2192	914.823	441	2.07443
SU15	0.36	2022	2022-02	0.369658	0.0172874	0.291261	0.0742974	0.105984	0.228965	0.212796	0.211813	0.46189	0.660126	0.218584	0.387854	0.61552	0.384929	0.426476	23	4.8717	10.6235	15.1829	5.02743	8.92064	1473.2	529	2.78487
JZ19	0.43	2022	2022-10	0.36244	0.0929211	0.433409	0.0299308	0.138434	0.142381	0.163356	0	0.309304	0.729553	0	0	0.615444	0.451097	0.509392	23	0	7.114	16.7797	0	0	1349.17	529	2.55041
IS25	0.46	2021	2021-03	0.334848	0.0508009	0.24714	0.315684	0.530747	0.0597611	0.163092	0.0526406	0.0128144	0.105875	0.632106	0.181786	0.615289	0.456788	0.54491	23	1.21073	0.294732	2.43512	14.5384	4.18108	1449.82	529	2.74068
NF1A	0.72	2021	2021-04	0.288887	0.462613	0.245808	0.0432543	0.0606467	0.0502949	0.0544711	0.232198	0.441875	0.389791	0.320676	0.635618	0.614919	0.519567	0.852823	23	5.34055	10.1631	8.96519	7.37556	14.6192	1285.63	529	2.4303
FF31	3.15	2022	2022-04	0.0503713	0.00902507	0.465722	0.0215935	0.0404363	0	0.0325161	0.0937277	0	0.919113	1	0	0.614397	0.73711	3.7306	11	1.031	0	10.1102	11	0	320.42	121	2.6481
JZ19	0.43	2021	2021-12	0.469674	0.0878113	0.257483	0.14782	0.138434	0.195958	0.163356	0.465681	0.548468	0.288975	0.0549906	0.769073	0.614306	0.451097	0.509245	23	10.7107	12.6148	6.64643	1.26478	17.6887	1349.17	529	2.55041
GE1A	1.33	2021	2021-09	0.326319	0.372591	0.169205	0.05082	0.0397917	0.0422803	0.0174681	0.466924	0.502793	0.153333	0.802651	0.183188	0.613803	0.541633	1.57491	22	10.2723	11.0615	3.37333	17.6583	4.03014	995.135	484	2.05606
IG13	1.2	2022	2022-05	0.175709	0.278972	0.151955	0.0556496	0.252028	0.00496596	0.0668449	0	0	0.815713	0.571149	0.927273	0.61318	0.697405	1.42074	11	0	0	8.97285	6.28264	10.2	303.308	121	2.50668
IB31	3.97	2022	2022-06	0.112135	0.265698	0.106767	0.0277417	0.0491185	0.0243041	0.0325697	0.0423203	0.269652	0.675165	0.0306273	0.483384	0.613099	0.443638	4.7002	21	0.888726	5.66269	14.1785	0.643174	10.1511	1143.05	441	2.59196
CB39	0.84	2022	2022-07	0.0891485	0.906012	0.226574	0.012834	0.01971	0.00525339	0.0396785	0.103766	0.0127298	0.71374	0.203534	0.168497	0.612886	0.518513	0.994447	21	2.17909	0.267326	14.9885	4.27422	3.53844	911.358	441	2.06657
HS21	1.58	2021	2021-04	0.464828	0.0212002	0.332388	0.0169674	0.0350051	0.237502	0.225783	0.172694	0.532146	0.138246	0.692922	0.321088	0.612813	0.502306	1.87047	23	3.97197	12.2394	3.17967	15.9372	7.38502	1292.2	529	2.44273
IJ1B	0.81	2021	2021-03	0.265771	0.47686	0.123565	0.0218648	0.215286	0.0788413	0.0726381	0	0.32264	0.13065	0	0.840714	0.612593	0.477843	0.95886	21	0	6.77545	2.74365	0	17.655	1100.29	441	2.49498
IG15	0.76	2022	2022-02	0.215247	0.488393	0.271182	0.0136918	0.108034	0	0.0403671	0.0288335	0	0.65821	0.361742	0	0.612401	0.594168	0.899627	20	0.57667	0	13.1642	7.23484	0	794.489	400	1.98622
JZ19	0.43	2021	2021-03	0.379088	0.0556559	0.403533	0.0712644	0.138434	0.142877	0.163356	0.163275	0.311516	0.661155	0.401042	0.130605	0.612212	0.451097	0.508975	23	3.75533	7.16487	15.2066	9.22396	3.00391	1349.17	529	2.55041
DD29	1.45	2022	2022-09	0.25652	0.529161	0.23659	0.0150552	0.0269961	0.0530874	0.056337	0.14658	0.230285	0.470654	0.334457	0.631026	0.612133	0.56314	1.71628	21	3.07819	4.83597	9.88373	7.02359	13.2515	914.823	441	2.07443
DD29	1.45	2021	2021-08	0.28172	0.56168	0.210045	0.0269029	0.0269961	0.0269068	0.056337	0.307377	0.0289314	0.162097	0.228035	0.805536	0.611834	0.56314	1.71615	21	6.45492	0.60756	3.40403	4.78873	16.9163	914.823	441	2.07443
IB33	3.5	2022	2022-07	0.115074	0.311142	0.126099	0.079803	0.0632326	0.061317	0.0367732	0.779275	0.664067	0.716922	0.315647	0	0.611615	0.46012	4.1422	21	16.3648	13.9454	15.0554	6.62858	0	1189.67	441	2.69767
GW15	0.29	2022	2022-05	0.240411	0.228478	0.545064	0.0767843	0.0871367	0.0624274	0.0925347	0.412631	0.225134	0.743688	0.296027	0.100498	0.611571	0.564554	0.343207	23	9.49051	5.17808	17.1048	6.80861	2.31145	1170.16	529	2.21202
IF5B	0.86	2022	2022-09	0.218729	0.562807	0.191866	0.0117242	0.0275106	0.0111658	0.0374287	0.045714	0.00632919	0.704838	0.135564	0.199438	0.611503	0.517695	1.01777	21	0.959995	0.132913	14.8016	2.84684	4.18819	1052.2	441	2.38594
HC3B	2.1	2021	2021-11	0.265161	0.344405	0.138272	0.0465635	0.0561504	0.00790659	0.0136239	0.579866	0.133498	0.247849	0.122106	0.749297	0.611465	0.533606	2.48522	23	13.3369	3.07046	5.70052	2.80843	17.2338	1284.73	529	2.4286
BV39	0.31	2021	2021-07	0.244168	0.0275525	0.523504	0.161831	0.262158	0.128209	0.159376	0.0778659	0.208506	0.498827	0.541798	0.111443	0.610466	0.458346	0.366773	23	1.79091	4.79564	11.473	12.4613	2.56319	1196.68	529	2.26216
ET21	0.88	2021	2021-03	0.385746	0.0140013	0.38855	0.0614862	0.0784516	0.189498	0.220253	0.523859	0.433755	0.798416	0.147567	0.0823663	0.610209	0.407626	1.0411	23	12.0487	9.97635	18.3636	3.39405	1.89443	1692.94	529	3.20027
IC29	6	2022	2022-09	0.161399	0.293001	0.13232	0.115077	0.0519153	0.0392957	0.024206	1	0.637353	0.592433	0.123976	0.319267	0.609775	0.439962	7.09759	21	21	13.3844	12.4411	2.6035	6.7046	1111.11	441	2.51953
ES25	0.31	2022	2022-03	0.283707	0.00698031	0.441692	0.0978876	0.108724	0.210995	0.184974	0.487157	0.704213	0.445505	0.648432	0.0248889	0.609314	0.493476	0.366666	22	10.7175	15.4927	9.8011	14.2655	0.547555	1295.21	484	2.67605
BR15	0.84	2021	2021-05	0.535752	0	0.0541588	0.343432	0.476389	0.0466514	0.0802557	0.459268	0.262963	0.314023	#NUM!	1	0.60931	0.58507	0.993546	12	5.51122	3.15555	3.76828	#NUM!	12	358.048	144	2.48644
LC15	2.13	2022	2022-02	0.166268	0.0894982	0.16231	0.0118317	0.0323338	0.0231294	0.0342939	0	0.163567	0.788144	1	0.653462	0.608972	0.72076	2.51913	11	0	1.79923	8.66958	11	7.18809	312.614	121	2.58359
RC19	4.5	2022	2022-02	1	0	0.0470706	0.00209874	0.00941406	0.0100984	0.116275	0	0	0	1	1	0.608592	0.673693	5.3216	11	0	0	0	11	11	309.115	121	2.55467
BR15	0.84	2021	2021-09	0.107046	0	0.389892	0.554603	0.476389	0.0303458	0.0802557	0.767911	0.171052	1	#NUM!	0	0.608475	0.58507	0.993336	12	9.21493	2.05263	12	#NUM!	0	358.048	144	2.48644
GW15	0.29	2022	2022-07	0.359428	0.261443	0.371193	0.0651756	0.0871367	0.0121043	0.0925347	0.350247	0	0.00275377	0.194457	0.771639	0.608183	0.564554	0.342912	23	8.05569	0	0.0633367	4.47252	17.7477	1170.16	529	2.21202
MS15	0.35	2021	2021-03	0.376187	0.186213	0.301658	0.0947035	0.0708821	0.198748	0.297474	0.585486	0.166407	0.414767	0	0.706616	0.607627	0.432348	0.413801	23	13.4662	3.82736	9.53964	0	16.2522	1330.16	529	2.51447
DD29	1.45	2022	2022-11	0.294959	0.604206	0.190893	0.0323566	0.0269961	0.0415184	0.056337	0.381395	0.141308	0	0.0888643	0.931451	0.60745	0.56314	1.71424	21	8.00929	2.96748	0	1.86615	19.5605	914.823	441	2.07443
NZ19	0.21	2022	2022-02	0.277226	0.153322	0.448702	0.0227636	0.0720471	0.141387	0.143466	0.126059	0.427427	0.634054	0.157317	0.467783	0.607157	0.421082	0.248251	23	2.89936	9.83081	14.5832	3.6183	10.759	1439.27	529	2.72075
GW1A	0.5	2021	2021-03	0.237584	0.230731	0.489492	0.0772194	0.103302	0.0898748	0.112428	0.170337	0.249574	0.75857	0.0754595	0.289143	0.607022	0.595493	0.591053	23	3.91775	5.7402	17.4471	1.73557	6.65028	1112.54	529	2.10311
BR15	0.84	2021	2021-03	0.351579	0	0.0808506	0.526467	0.476389	0.176122	0.0802557	0.726788	0.992756	0.60872	#NUM!	0.920497	0.606782	0.58507	0.992909	12	8.72145	11.9131	7.30464	#NUM!	11.046	358.048	144	2.48644
GD29	0.85	2021	2021-08	0.268163	0.368037	0.140141	0.0260928	0.0570351	0.00341554	0.00235607	0.0100971	0.336804	0.542941	0.432025	0.267945	0.606706	0.521575	1.00471	23	0.232234	7.7465	12.4876	9.93657	6.16273	1093.28	529	2.0667
BX29	0.71	2021	2021-11	0.313871	0.00454371	0.247025	0.456433	0.564496	0.136682	0.156285	0.107633	0.299485	0.105613	0.726131	0.282336	0.605818	0.469312	0.839039	23	2.47556	6.88815	2.42909	16.701	6.49373	1355.74	529	2.56283
HS21	1.58	2022	2022-04	0.371586	0.0628349	0.366264	0.021409	0.0350051	0.237825	0.225783	0.231425	0.533667	0.804882	0.0898567	0.146796	0.605669	0.502306	1.86709	23	5.32277	12.2743	18.5123	2.0667	3.37632	1292.2	529	2.44273
HC3B	2.1	2022	2022-04	0.290274	0.357365	0.121928	0.0361273	0.0561504	0.0184549	0.0136239	0.449902	0.311601	0	0.0890707	0.88291	0.605541	0.533606	2.48149	23	10.3477	7.16682	0	2.04863	20.3069	1284.73	529	2.4286
LS13	0.66	2021	2021-10	0.149294	0.0116599	0.585545	0.0829432	0.0910102	0.293374	0.294168	0.304942	0.551604	0.587196	0.298797	0.474338	0.6051	0.422319	0.77981	23	7.01367	12.6869	13.5055	6.87234	10.9098	1532.27	529	2.89655
GZ19	0.54	2022	2022-11	0.27027	0.208351	0.449367	0.0799401	0.10713	0.10542	0.0936129	0.11985	0.581221	0.249959	0.703904	0.139258	0.60495	0.505005	0.638002	23	2.75656	13.3681	5.74905	16.1898	3.20293	1288.44	529	2.43561
EX2A	0.54	2021	2021-09	0.251654	0	0.654558	0.066262	0.0793591	0.0446933	0.22915	0.440649	0	1	1	0	0.604926	0.674885	0.637998	12	5.28778	0	12	12	0	412.021	144	2.86126
FR41	0.75	2021	2021-02	0.305452	0.000475112	0.240802	0.287267	0.133241	0.0598761	0.257391	1	0	0.282175	0.998873	1	0.604825	0.691114	0.886086	12	12	0	3.38611	11.9865	12	387.709	144	2.69243
FN2B	1.16	2022	2022-02	0.189964	0.0302432	0.20762	0.0116777	0.0378349	0.0112472	0.065923	0.052144	0	0.752423	1	0.652708	0.604697	0.703258	1.37043	11	0.573584	0	8.27666	11	7.17978	272.949	121	2.25578
IS2A	0.55	2022	2022-11	0.196111	0.1626	0.43191	0.166964	0.495418	0.157902	0.129157	0	0.591229	0.759374	0	0	0.604689	0.390088	0.649774	23	0	13.5983	17.4656	0	0	1630.21	529	3.08168
JU15	0.36	2021	2021-04	0.277371	0	0.203548	0.479254	0.220975	0.135521	0.116215	1	0.596971	0.716328	1	0.959201	0.604296	0.669611	0.425264	12	12	7.16365	8.59593	12	11.5104	428.343	144	2.9746
LK1B	1.67	2022	2022-08	0.248953	0.328772	0.16893	0.0327969	0.0234044	0.0621959	0.0478906	0.880219	0.427987	0.412056	0.0130735	0.741196	0.604063	0.427126	1.97264	21	18.4846	8.98773	8.65318	0.274544	15.5651	1226.05	441	2.78015
GW1A	0.5	2022	2022-02	0.335485	0.178193	0.411389	0.106507	0.103302	0.112273	0.112428	0.414443	0.428266	0.124321	0.345403	0.77554	0.603794	0.595493	0.590569	23	9.53219	9.85011	2.85939	7.94427	17.8374	1112.54	529	2.10311
OS29	0.27	2021	2021-09	0.366862	0.0270936	0.322221	0.0449055	0.0404587	0.144869	0.110901	0.286114	0.555012	0	0	0.92941	0.603515	0.375751	0.318885	22	6.29451	12.2103	0	0	20.447	1278.36	484	2.64124
NF1A	0.72	2021	2021-07	0.315116	0.458962	0.221739	0.0447482	0.0606467	0.0383568	0.0544711	0.246918	0.328403	0.2501	0.329765	0.735239	0.603432	0.519567	0.850341	23	5.67911	7.55328	5.75231	7.58459	16.9105	1285.63	529	2.4303
IC29	6	2022	2022-07	0.167317	0.310609	0.109241	0.106044	0.0519153	0.0457165	0.024206	0.904461	0.752581	0.542772	0	0.531711	0.603407	0.439962	7.08613	21	18.9937	15.8042	11.3982	0	11.1659	1111.11	441	2.51953
LU15	0.45	2021	2021-03	0.296767	0.18999	0.466705	0.0353802	0.0523768	0.069144	0.10409	0.238365	0.0483055	0.504279	0.150196	0.590137	0.603143	0.437	0.531424	23	5.48239	1.11103	11.5984	3.45452	13.5732	1296.79	529	2.45139
IF49	3	2022	2022-11	0.195061	0.362654	0.114947	0.085014	0.0379185	0.0366588	0.0643597	1	0.177166	0.546809	0	0.508378	0.602995	0.533905	3.5427	21	21	3.72049	11.483	0	10.6759	1088.59	441	2.46847
MB19	2.52	2021	2021-11	0.28933	0.239441	0.200158	0.0393026	0.0322193	0.0447339	0.0486278	0.483545	0.217437	0	0.712646	0.564247	0.602725	0.52011	2.97566	21	10.1544	4.56618	0	14.9656	11.8492	986.285	441	2.23647
JJ15	0.49	2022	2022-05	0.176223	0.587066	0.290853	0.0379064	0.0702909	0.00200287	0.024715	0.188171	0.0266554	0.606577	0.117206	0.521451	0.602603	0.519894	0.578583	22	4.13977	0.58642	13.3447	2.57854	11.4719	1123.01	484	2.32026
DU15	0.37	2022	2022-11	0.0334556	0	0.265035	0.285182	0.560993	0	0.130476	0	0	1	1	0.612391	0.602498	0.747299	0.436877	10	0	0	10	10	6.12391	319.677	100	3.19677
IT2B	0.8	2021	2021-03	0.170291	0.0202702	0.471772	0.293229	0.462315	0.207021	0.145523	0.272713	1	0.522621	0	0.338766	0.602465	0.436286	0.944592	23	6.2724	23	12.0203	0	7.79161	1529.1	529	2.89054
FW21	0.8	2021	2021-04	0.0808131	0	0.529073	0.00479012	0.0769756	0.753442	0.186925	0	1	1	1	0	0.602328	0.633574	0.944559	12	0	12	12	12	0	387.787	144	2.69297
XJ1B	0.43	2021	2021-06	0.324742	0.494512	0.16904	0.00690533	0.0155488	0.0468097	0.0794125	0.0822775	0.136434	0.371927	0.00796653	0.847193	0.602012	0.536699	0.50766	20	1.64555	2.72867	7.43854	0.159331	16.9439	881.264	400	2.20316
GF19	1.07	2021	2021-02	0.252961	0.326416	0.180156	0.196446	0.238903	0.151555	0.130518	0.208573	0.818997	0.135858	0.695991	0	0.601963	0.515295	1.26323	23	4.79717	18.8369	3.12473	16.0078	0	1390.14	529	2.62786
IF49	3	2022	2022-06	0.183884	0.314829	0.119615	0.0438994	0.0379185	0.0880084	0.0643597	0.463301	0.706411	0.621606	0.395095	0.454178	0.601524	0.533905	3.54137	21	9.72932	14.8346	13.0537	8.297	9.53774	1088.59	441	2.46847
KT15	0.43	2022	2022-07	0.172945	0.0789839	0.518456	0.102584	0.128678	0.199099	0.20209	0.412575	0.350681	0.416197	0.316092	0.666487	0.601007	0.517606	0.50753	23	9.48923	8.06565	9.57254	7.27012	15.3292	1314	529	2.48393
GW1A	0.5	2021	2021-07	0.238357	0.19263	0.498562	0.0851244	0.103302	0.105128	0.112428	0.236224	0.371265	0.753569	0.271223	0.232657	0.600876	0.595493	0.590131	23	5.43314	8.5391	17.3321	6.23813	5.35111	1112.54	529	2.10311
IU19	0.3	2022	2022-04	0.206942	0.0415811	0.28094	0.464031	0.451108	0.168169	0.145262	0.722141	0.762627	0.534973	0	0.487677	0.600543	0.538226	0.354049	23	16.6093	17.5404	12.3044	0	11.2166	1389.42	529	2.62649
IG15	0.76	2021	2021-11	0.301951	0.421893	0.173663	0.089232	0.108034	0.0221221	0.0403671	0.187913	0.182205	0.229714	0.582884	0.668514	0.600145	0.594168	0.896833	20	3.75827	3.64409	4.59428	11.6577	13.3703	794.489	400	1.98622
EB19	6.81	2021	2021-10	0.121074	0.401389	0.0788939	0.035486	0.0284104	0.00467585	0.0134939	0.667919	0.121479	0.451586	0	0.786901	0.599696	0.555324	8.03518	21	14.0263	2.55105	9.4833	0	16.5249	1040.63	441	2.35969
IJ1B	0.81	2021	2021-12	0.262635	0.0909346	0.279699	0.293829	0.215286	0.0909401	0.0726381	0.546181	0.386962	0.150469	0.905913	0	0.599393	0.477843	0.955652	21	11.4698	8.1262	3.15984	19.0242	0	1100.29	441	2.49498
DD29	1.45	2022	2022-10	0.256336	0.603608	0.206309	0.0323253	0.0269961	0.065041	0.056337	0.38097	0.322219	0.472908	0.0908211	0.8301	0.599374	0.56314	1.71073	21	8.00037	6.7666	9.93107	1.90724	17.4321	914.823	441	2.07443
GR13	0.69	2021	2021-06	0.327767	0.12386	0.372163	0.0584766	0.0595323	0.358978	0.382276	0.246108	0.368576	0.6743	0.220369	0.453548	0.599119	0.465338	0.814018	23	5.6605	8.47724	15.5089	5.06848	10.4316	1252.45	529	2.36759
LF19	1.65	2022	2022-05	0.168052	0.386087	0.275303	0.050029	0.0652014	0.083881	0.0706643	0.404277	0.411881	0.524376	0.52898	0.521513	0.598673	0.507166	1.94634	21	8.48982	8.64949	11.0119	11.1086	10.9518	1159.26	441	2.62871
GW15	0.29	2021	2021-08	0.244755	0.292834	0.455643	0.0823478	0.0871367	0.054396	0.0925347	0.442529	0.189203	0.716645	0.0977379	0.445662	0.598549	0.564554	0.342074	23	10.1782	4.35168	16.4828	2.24797	10.2502	1170.16	529	2.21202
GW15	0.29	2021	2021-11	0.250336	0.259709	0.451505	0.0699438	0.0871367	0.119775	0.0925347	0.375871	0.481696	0.681902	0.199798	0.461635	0.598456	0.564554	0.342066	23	8.64504	11.079	15.6838	4.59536	10.6176	1170.16	529	2.21202
XS13	0.37	2021	2021-10	0.0391965	0	0.974637	0	0.234235	0	0.140866	0	0	0.869864	1	0	0.597909	0.66988	0.436368	12	0	0	10.4384	12	0	357.63	144	2.48354
CB19	1.06	2021	2021-07	0.560128	0.256063	0.167278	0.106935	0.0885956	0.149528	0.132923	0.431007	0.598709	0.524361	0.424492	0.597069	0.597753	0.582083	1.25009	21	9.05115	12.5729	11.0116	8.91433	12.5385	962.807	441	2.18324
CU19	0.4	2022	2022-06	0.352974	0.0392967	0.399675	0.115079	0.269089	0.213162	0.252201	0	0.263882	0.349261	0.622888	0.318085	0.597737	0.479634	0.471728	22	0	5.80541	7.68375	13.7035	6.99787	1192.61	484	2.46407
DE29	1.25	2021	2021-03	0.320205	0.527142	0.199468	0.0170115	0.00888239	0.0233775	0.0523303	0.5384	0.00824042	0.152306	0.79323	0.236828	0.597425	0.500179	1.47403	21	11.3064	0.173049	3.19843	16.6578	4.97338	938.608	441	2.12836
GE15	1	2021	2021-12	0.297343	0.491705	0.108705	0.0424258	0.0377298	0.00245867	0.00544909	0.514809	0.111269	0.138021	0.515548	0.663721	0.59726	0.529763	1.17918	22	11.3258	2.44792	3.03645	11.3421	14.6019	1079.83	484	2.23106
BR25	0.2	2022	2022-07	0.334431	0.00967242	0.480018	0.0961225	0.173356	0.149571	0.188717	0.0892236	0.232588	0.103928	0.738764	0.26529	0.597212	0.520874	0.235833	23	2.05214	5.34953	2.39034	16.9916	6.10167	1199.12	529	2.26677
IS25	0.46	2021	2021-07	0.209217	0.0592021	0.242576	0.463676	0.530747	0.105171	0.163092	0.388546	0.224628	0.550322	0.571266	0.202239	0.597063	0.456788	0.542395	23	8.93656	5.16643	12.6574	13.1391	4.6515	1449.82	529	2.74068
TT19	0.63	2022	2022-05	0.103932	0.0279581	0.365177	0.281314	0.315997	0.317785	0.307573	0.364881	0.641828	0.668663	0.342314	0.286836	0.59667	0.47371	0.742771	23	8.39226	14.762	15.3792	7.87322	6.59724	1418.39	529	2.68126
CB39	0.84	2022	2022-06	0.0800254	0.993044	0.212376	0.0190191	0.01971	0.0035636	0.0396785	0.164536	0	0.818791	0.0150633	0.294123	0.596636	0.518513	0.990352	21	3.45526	0	17.1946	0.316328	6.17658	911.358	441	2.06657
LV19	0.72	2022	2022-01	0.439842	0.0545755	0.356878	0.0729278	0.114492	0.0901037	0.20943	0.139803	0	0	0	0.922785	0.596295	0.400235	0.8488	21	2.93586	0	0	0	19.3785	1297.65	441	2.94251
NF1A	0.72	2022	2022-05	0.268482	0.386871	0.301861	0.0458077	0.0606467	0.0326037	0.0544711	0.257358	0.27372	0.498459	0.509233	0.403621	0.59602	0.519567	0.84874	23	5.91922	6.29557	11.4646	11.7124	9.28329	1285.63	529	2.4303
IF15	2.5	2022	2022-07	0.202014	0.396386	0.103195	0.0574826	0.0315791	0.0304323	0.0662677	0.498318	0.0654986	0.140267	0.463196	0.752277	0.595565	0.391852	2.94667	21	10.4647	1.37547	2.94561	9.72713	15.7978	1204.99	441	2.73239
NF15	0.7	2021	2021-03	0.281458	0.471715	0.239977	0.0698665	0.0769177	0.032955	0.0600122	0.393518	0.0654558	0.491663	0.365034	0.513239	0.595359	0.511415	0.825025	23	9.05091	1.50548	11.3082	8.39579	11.8045	1334.73	529	2.52312
ES25	0.31	2022	2022-09	0.328094	0.0172492	0.344929	0.092293	0.108724	0.171095	0.184974	0.459315	0.427539	0	0.13123	0.956086	0.595324	0.493476	0.365365	22	10.1049	9.40586	0	2.88707	21.0339	1295.21	484	2.67605
JS1B	0.65	2022	2022-09	0.337166	0.030568	0.333421	0.177693	0.256324	0.200626	0.153033	0	0.690825	0.765741	0.0981298	0.000477292	0.594576	0.403738	0.765942	23	0	15.889	17.612	2.25699	0.0109777	1422.53	529	2.68909
XJ1B	0.43	2021	2021-11	0.376558	0.225743	0.211722	0.012241	0.0155488	0.0741535	0.0794125	0.191361	0.281329	0.0442831	0.738531	0.59962	0.594357	0.536699	0.506672	20	3.82721	5.62658	0.885662	14.7706	11.9924	881.264	400	2.20316
LJ15	0.37	2022	2022-11	0.22611	0.323462	0.24839	0.0292851	0.0190406	0.0213369	0.0581608	0.530405	0.127648	0.662727	0.334481	0.493889	0.594148	0.54525	0.43595	21	11.1385	2.6806	13.9173	7.0241	10.3717	998.851	441	2.26497
LS15	0.5	2022	2022-06	0.102458	0.00134517	0.652852	0.0885718	0.0946858	0.291399	0.281443	0.311784	0.493905	0.877355	0	0.186308	0.593681	0.395937	0.589052	23	7.17102	11.3598	20.1792	0	4.28509	1459.92	529	2.75978
EV1A	0.38	2021	2021-03	0.111871	0	0.846052	0.047356	0.0861792	0	0.175046	0.154493	0	1	1	0	0.593574	0.702932	0.447667	12	1.85391	0	12	12	0	429.749	144	2.98437
GW15	0.29	2022	2022-03	0.266951	0.252562	0.432585	0.125579	0.0871367	0.103015	0.0925347	0.674851	0.406712	0.578463	0.221819	0.534666	0.593388	0.564554	0.341625	23	15.5216	9.35438	13.3047	5.10184	12.2973	1170.16	529	2.21202
JJ15	0.49	2022	2022-08	0.13411	0.624061	0.311099	0.0600849	0.0702909	0.0174231	0.024715	0.349228	0.231877	0.843004	0	0.393068	0.593126	0.519894	0.577189	22	7.68301	5.1013	18.5461	0	8.6475	1123.01	484	2.32026
CS1A	0.65	2021	2021-01	0.303289	0.0292417	0.340754	0.267923	0.356348	0.184419	0.235995	0.225311	0.155169	0.495475	0.645554	0	0.59266	0.470383	0.765569	23	5.18215	3.56889	11.3959	14.8477	0	1297.54	529	2.45282
IU19	0.3	2021	2021-06	0.244068	0.0189021	0.306952	0.420374	0.451108	0.150267	0.145262	0.580618	0.567181	0.292043	0.668816	0.315099	0.5921	0.538226	0.353289	23	13.3542	13.0452	6.717	15.3828	7.24727	1389.42	529	2.62649
TV19	0.73	2022	2022-08	0.142184	0.0101759	0.373643	0.264303	0.336579	0.304131	0.299171	0.20625	0.507126	0.439561	0.683724	0.0770358	0.591976	0.401133	0.859643	23	4.74375	11.6639	10.1099	15.7257	1.77182	1555.23	529	2.93994
GE15	1	2021	2021-07	0.195153	0.525376	0.131175	0.0430681	0.0377298	0	0.00544909	0.525151	0	0.57192	0.355901	0.452833	0.591949	0.529763	1.17758	22	11.5533	0	12.5822	7.82981	9.96232	1079.83	484	2.23106
DD29	1.45	2021	2021-11	0.258731	0.521517	0.227295	0.0118589	0.0269961	0.081202	0.056337	0.103201	0.446512	0.443585	0.359472	0.692129	0.591865	0.56314	1.70746	21	2.16721	9.37675	9.31529	7.54892	14.5347	914.823	441	2.07443
HR11	1.15	2021	2021-03	0.383387	0.130883	0.254925	0.023814	0.0311706	0.376571	0.350234	0.244981	0.505864	0.790798	0	0.402009	0.591509	0.453473	1.35407	23	5.63457	11.6349	18.1884	0	9.2462	1352.27	529	2.55627
CB19	1.06	2022	2022-01	0.556394	0.277847	0.162869	0.0845507	0.0885956	0.142465	0.132923	0.288441	0.541472	0.55753	0.293491	0.68369	0.591381	0.582083	1.24806	21	6.05726	11.3709	11.7081	6.16332	14.3575	962.807	441	2.18324
KT15	0.43	2022	2022-04	0.226614	0.0855981	0.478886	0.150039	0.128678	0.218805	0.20209	0.740119	0.433356	0.0130356	0.258821	0.80983	0.591022	0.517606	0.506242	23	17.0227	9.96718	0.299819	5.95288	18.6261	1314	529	2.48393
BV39	0.31	2021	2021-11	0.182806	0.0601317	0.450526	0.258813	0.262158	0.0833311	0.159376	0.234998	0	0.800697	0	0.258634	0.590779	0.458346	0.364942	23	5.40495	0	18.416	0	5.94858	1196.68	529	2.26216
IC39	2.6	2021	2021-07	0.226604	0.334449	0.104289	0.0418604	0.0804234	0.0340501	0.0439479	0	0.267738	0.115833	0.628742	0.570283	0.590755	0.526481	3.06079	21	0	5.62249	2.43248	13.2036	11.9759	1096.2	441	2.48571
FW19	0.53	2021	2021-06	0.391597	0.0886288	0.323931	0.0495543	0.0826931	0.0627263	0.138831	0.134355	0.0387449	0.375079	0.431547	0.509991	0.590722	0.48179	0.623925	23	3.09015	0.891133	8.62681	9.92559	11.7298	1240.08	529	2.34419
XJ1B	0.43	2021	2021-08	0.299518	0.310829	0.220749	0.0078935	0.0155488	0.123421	0.0794125	0.10248	0.542398	0.531421	0.507251	0.547258	0.59054	0.536699	0.50618	20	2.04959	10.848	10.6284	10.145	10.9452	881.264	400	2.20316
NF1A	0.72	2021	2021-09	0.292795	0.581924	0.223557	0.0196886	0.0606467	0.0145032	0.0544711	0	0.101675	0.368975	0.0236574	0.72771	0.590348	0.519567	0.847515	23	0	2.33853	8.48643	0.54412	16.7373	1285.63	529	2.4303
LK1B	1.67	2022	2022-10	0.25558	0.150175	0.377598	0.0282139	0.0234044	0.0915295	0.0478906	0.728322	0.646437	0.378619	0.778366	0	0.590147	0.427126	1.96566	21	15.2948	13.5752	7.95099	16.3457	0	1226.05	441	2.78015
KS19	0.35	2021	2021-05	0.344715	0.0318288	0.407272	0.136218	0.101739	0.197344	0.150846	0.76575	0.544913	0.281666	0.00899808	0.795391	0.590056	0.472301	0.411956	23	17.6122	12.533	6.47831	0.206956	18.294	1355.11	529	2.56164
EX2A	0.54	2021	2021-08	0.338455	0	0.360394	0	0.0793591	0.56739	0.22915	0	1	0.44355	1	0.985529	0.590054	0.674885	0.635589	12	0	12	5.3226	12	11.8263	412.021	144	2.86126
XJ1B	0.43	2021	2021-07	0.319088	0.497443	0.174669	0.0517949	0.0155488	0.0625426	0.0794125	1	0.219802	0.407678	0	0.814547	0.590032	0.536699	0.506114	20	20	4.39604	8.15356	0	16.2909	881.264	400	2.20316
FR11	1.17	2021	2021-12	0.339065	0.0773492	0.342376	0.0726681	0.10025	0.189728	0.217633	0.173952	0.412823	0.470875	0.325876	0.611736	0.589963	0.421599	1.37708	23	4.0009	9.49492	10.8301	7.49514	14.0699	1460.76	529	2.76136
LJ13	0.5	2022	2022-11	0.278629	0.196823	0.307153	0.00486799	0.0108265	0.0521446	0.0824836	0.116207	0.163883	0.855734	0.312483	0	0.589952	0.525104	0.588493	21	2.44034	3.44155	17.9704	6.56215	0	1012.11	441	2.29504
HS3B	0.4	2022	2022-08	0.39992	0.0629658	0.359946	0.0246146	0.0662496	0.278711	0.227283	0.0816398	0.658177	0.212264	0	0.832817	0.589911	0.464468	0.470789	23	1.87772	15.1381	4.88208	0	19.1548	1347.02	529	2.54634
GK19	1.25	2022	2022-05	0.145445	0.0611948	0.273231	0.00420735	0.0537676	0.00806728	0.0379419	0.0136735	0.0753758	1	1	0.532637	0.589169	0.739868	1.47094	11	0.150409	0.829134	11	11	5.85901	271.369	121	2.24272
LJ15	0.37	2022	2022-10	0.257114	0.279777	0.230024	0.0237454	0.0190406	0.0565768	0.0581608	0.43007	0.33847	0.564023	0.470786	0.558668	0.589112	0.54525	0.435391	21	9.03148	7.10786	11.8445	9.88651	11.732	998.851	441	2.26497
TV19	0.73	2021	2021-10	0.197017	0.00762277	0.341228	0.251615	0.336579	0.21745	0.299171	0.15508	0.159516	0.17323	0.763078	0.206646	0.589074	0.401133	0.859007	23	3.56683	3.66886	3.98429	17.5508	4.75286	1555.23	529	2.93994
DD29	1.45	2021	2021-04	0.239048	0.63136	0.225706	0.0376033	0.0269961	0.0482664	0.056337	0.452602	0.193207	0.684584	0	0.702578	0.588986	0.56314	1.70621	21	9.50465	4.05734	14.3763	0	14.7541	914.823	441	2.07443
OS29	0.27	2021	2021-12	0.249263	0.0215434	0.399358	0.0308409	0.0404587	0.137903	0.110901	0.196502	0.528325	0.469967	0.204852	0.735515	0.588964	0.375751	0.317706	22	4.32304	11.6231	10.3393	4.50674	16.1813	1278.36	484	2.64124
HS2B	0.7	2021	2021-07	0.304238	0.083492	0.396788	0.0573421	0.0463547	0.308298	0.256995	0.493401	0.64817	0.650076	0	0.575655	0.588774	0.484502	0.823643	23	11.3482	14.9079	14.9517	0	13.2401	1296.78	529	2.45139
RU25	0.3	2022	2022-04	0.0548942	0	0.440728	0.0223874	0.0311818	0.165391	0.518124	0.160915	0	1	1	0.597988	0.588703	0.681223	0.352983	11	1.77007	0	11	11	6.57787	300.845	121	2.48632
GV13	0.77	2022	2022-06	0.382977	0.193881	0.343338	0.0496106	0.0981922	0.0982753	0.0874161	0.110043	0.341967	0.522413	0	0.716524	0.588222	0.437611	0.905879	23	2.53098	7.86523	12.0155	0	16.4801	1227.64	529	2.32069
FR1B	0.7	2021	2021-10	0.332127	0.122191	0.341455	0.0701634	0.0922667	0.256439	0.237881	0.162173	0.558014	0.463046	0	0.75709	0.587606	0.424261	0.823397	23	3.72999	12.8343	10.6501	0	17.4131	1368.03	529	2.58606
BJ1B	1.09	2022	2022-03	0.253005	0.358867	0.194326	0.167145	0.284251	0.0961241	0.100056	0.376391	0.556871	0.599009	0.671781	0.445563	0.587478	0.48682	1.28211	19	7.15144	10.5805	11.3812	12.7638	8.4657	1142.01	361	3.16345
XJ1B	0.43	2021	2021-10	0.339049	0.361107	0.183781	0.00288081	0.0155488	0.0402836	0.0794125	0	0.101852	0.281456	0.370586	0.761692	0.587416	0.536699	0.505777	20	0	2.03704	5.62912	7.41171	15.2338	881.264	400	2.20316
CS1A	0.65	2022	2022-04	0.330238	0.0551058	0.200188	0.181388	0.356348	0.294294	0.235995	0	0.453119	0.383299	0.332048	0.612808	0.587145	0.470383	0.764493	23	0	10.4217	8.81587	7.63711	14.0946	1297.54	529	2.45282
GW1A	0.5	2021	2021-02	0.221175	0.201007	0.535921	0.080533	0.103302	0.0989345	0.112428	0.197956	0.321852	0.864882	0.228183	0	0.587029	0.595493	0.588054	23	4.55298	7.40259	19.8923	5.24821	0	1112.54	529	2.10311
IB33	3.5	2022	2022-11	0.0630572	0.364442	0.118306	0.0385579	0.0632326	0.0311066	0.0367732	0.242133	0.247725	1	0	0.144175	0.586849	0.46012	4.11619	21	5.0848	5.20223	21	0	3.02767	1189.67	441	2.69767
ER1B	0.61	2021	2021-05	0.379925	0.0233001	0.334707	0.0627642	0.0506164	0.480603	0.577781	0.552698	0.314987	0.292224	0.543432	0.559328	0.586757	0.460659	0.717377	23	12.7121	7.24469	6.72115	12.4989	12.8646	1399.02	529	2.64464
IF49	3	2021	2021-07	0.264236	0.282814	0.101968	0.0314825	0.0379185	0.0431958	0.0643597	0.301213	0.244542	0.0838853	0.659583	0.659097	0.586551	0.533905	3.5279	21	6.32548	5.13538	1.76159	13.8512	13.841	1088.59	441	2.46847
LZ1B	0.3	2021	2021-03	0.23277	0.0599122	0.329715	0.0273578	0.101848	0.0144823	0.116296	0.00199416	0	0.859127	0.878878	0.608532	0.586292	0.680504	0.352766	12	0.02393	0	10.3095	10.5465	7.30239	362.611	144	2.51813
DE29	1.25	2021	2021-11	0.29534	0.531335	0.219736	0	0.00888239	0.0389572	0.0523303	0	0.100113	0.300957	0.785278	0	0.586145	0.500179	1.4698	21	0	2.10238	6.32009	16.4908	0	938.608	441	2.12836
GD29	0.85	2022	2022-03	0.313638	0.367442	0.115926	0.0276359	0.0570351	0	0.00235607	0.0266771	0	0.208773	0.436407	0.56734	0.586125	0.521575	0.999462	23	0.613573	0	4.80178	10.0374	13.0488	1093.28	529	2.0667
GR13	0.69	2022	2022-09	0.258994	0.153891	0.473714	0.0975361	0.0595323	0.226049	0.382276	0.469336	0.00869838	0.884673	0	0.093024	0.585955	0.465338	0.811293	23	10.7947	0.200063	20.3475	0	2.13955	1252.45	529	2.36759
EB19	6.81	2021	2021-03	0.148979	0.332312	0.0815151	0.0321735	0.0284104	0	0.0134939	0.587141	0	0.122439	0.491733	0.726622	0.585936	0.555324	8.00707	21	12.33	0	2.57121	10.3264	15.2591	1040.63	441	2.35969
BR21	1.15	2021	2021-07	0.304295	0.0337931	0.412515	0.147788	0.131895	0.147691	0.206899	0.679762	0.145609	0.648949	0.337527	0.320263	0.585763	0.479396	1.35209	23	15.6345	3.349	14.9258	7.76312	7.36604	1454.44	529	2.74942
GV15	0.58	2022	2022-06	0.500745	0.141302	0.365954	0.044355	0.0925023	0.0218187	0.0731192	0.170318	0.0603232	0	0.507589	0.657502	0.585633	0.473692	0.6819	23	3.91732	1.38743	0	11.6745	15.1225	1238.57	529	2.34134
DD29	1.45	2021	2021-07	0.280334	0.477545	0.222479	0.0446898	0.0269961	0.0296706	0.056337	0.54878	0.0501879	0.179074	0.503378	0.723794	0.585365	0.56314	1.70463	21	11.5244	1.05395	3.76055	10.5709	15.1997	914.823	441	2.07443
GE15	1	2021	2021-05	0.241021	0.60044	0.112932	0.0104518	0.0377298	0.0220966	0.00544909	0	1	0.377166	0	0.624047	0.585069	0.529763	1.17552	22	0	22	8.29766	0	13.729	1079.83	484	2.23106
XJ1B	0.43	2021	2021-05	0.343236	0.250448	0.22028	0.00674314	0.0155488	0.052882	0.0794125	0.0789616	0.168611	0.254983	0.671377	0.549978	0.585055	0.536699	0.505472	20	1.57923	3.37221	5.09966	13.4275	10.9996	881.264	400	2.20316
HC3B	2.1	2021	2021-02	0.228095	0.345666	0.158157	0.0477932	0.0561504	0.00899185	0.0136239	0.59518	0.151822	0.613659	0.118893	0.586729	0.58504	0.533606	2.46858	23	13.6891	3.49192	14.1142	2.73453	13.4948	1284.73	529	2.4286
LD19	1.92	2022	2022-04	0.227912	0.363886	0.291299	0.0250011	0.0314576	0.0518459	0.0520886	0.239194	0.259503	0.949185	0.261026	0	0.584675	0.628429	2.25677	21	5.02307	5.44957	19.9329	5.48155	0	854.077	441	1.93668
FR29	1.35	2021	2021-03	0.0632845	0.335957	0.0498394	0.00735871	0.099568	0.0337266	0.146592	0	0	1	0.355078	1	0.584242	0.674634	1.58662	12	0	0	12	4.26093	12	246.003	144	1.70835
KV1B	0.49	2021	2021-10	0.158868	0.046227	0.561918	0.163678	0.234077	0.220122	0.153654	0.240843	0.684517	0.637725	0.486524	0.103967	0.584002	0.40737	0.575848	23	5.53939	15.7439	14.6677	11.1901	2.39124	1384.63	529	2.61745
GE1A	1.33	2022	2022-08	0.228522	0.420495	0.162587	0.0522587	0.0397917	0.0059665	0.0174681	0.484655	0.0709531	0.594367	0.529346	0.276087	0.583471	0.541633	1.56281	22	10.6624	1.56097	13.0761	11.6456	6.07392	995.135	484	2.05606
GD29	0.85	2022	2022-06	0.334691	0.392508	0.103112	0.067975	0.0570351	0.00959157	0.00235607	0.460107	0.945819	0.0540708	0.251788	0.725779	0.583279	0.521575	0.998736	23	10.5825	21.7538	1.24363	5.79112	16.6929	1093.28	529	2.0667
TT19	0.63	2022	2022-07	0.110063	0.018654	0.428056	0.246277	0.315997	0.305797	0.307573	0.27531	0.558757	0.624177	0.561182	0.0636272	0.583085	0.47371	0.740203	23	6.33212	12.8514	14.3561	12.9072	1.46342	1418.39	529	2.68126
HR11	1.15	2021	2021-12	0.453436	0.0601482	0.27405	0.0361031	0.0311706	0.276077	0.350234	0.498394	0.236457	0.591381	0.540444	0.235884	0.582462	0.453473	1.35095	23	11.4631	5.43851	13.6018	12.4302	5.42533	1352.27	529	2.55627
KD19	2.42	2022	2022-06	0.241998	0.511543	0.22213	0.0572875	0.0503618	0.00328185	0.0174265	0.705045	0	0.11491	0.656714	0.530777	0.58235	0.572877	2.84279	21	14.806	0	2.41312	13.791	11.1463	1034.8	441	2.34649
LJ15	0.37	2021	2021-08	0.300643	0.29747	0.252534	0.00932778	0.0190406	0.167155	0.0581608	0.168943	1	0.425442	0.415579	0.479275	0.582269	0.54525	0.434632	21	3.5478	21	8.93429	8.72717	10.0648	998.851	441	2.26497
ER1B	0.61	2021	2021-01	0.364469	0.0240289	0.353318	0.0264672	0.0506164	0.580347	0.577781	0.111197	0.541159	0.35276	0.529151	0.490895	0.581811	0.460659	0.716471	23	2.55754	12.4467	8.11347	12.1705	11.2906	1399.02	529	2.64464
IF5B	0.86	2022	2022-11	0.200995	0.504107	0.195832	0.0286618	0.0275106	0.0397523	0.0374287	0.34353	0.468356	0.833056	0.456005	0.1344	0.581322	0.517695	1.00998	21	7.21413	9.83548	17.4942	9.57611	2.8224	1052.2	441	2.38594
IT21	1.4	2022	2022-03	0.187468	0.0583258	0.383146	0.322865	0.350215	0.0902021	0.16763	0.391494	0	0.716713	0	0.510834	0.581317	0.394419	1.64415	23	9.00436	0	16.4844	0	11.7492	1565.72	529	2.95978
FV29	0.33	2021	2021-03	0.285068	0.0622027	0.458025	0.0940951	0.0944113	0.213017	0.217947	0.590828	0.583684	0.39773	0.246645	0.713438	0.581083	0.454141	0.387527	23	13.5891	13.4247	9.1478	5.67285	16.4091	1570.81	529	2.9694
BU21	0.95	2022	2022-02	0.0178654	0	0.0237014	1	0.449641	0.150679	0.182268	1	0.362046	1	1	1	0.58101	0.700506	1.11559	11	11	3.98251	11	11	11	296.05	121	2.44669
IU29	0.3	2022	2022-03	0.181905	0.0176906	0.210464	0.61203	0.558916	0.127809	0.12377	0.897468	0.440439	0.511983	0	0.643004	0.580827	0.475164	0.352274	23	20.6418	10.1301	11.7756	0	14.7891	1578.81	529	2.98452
IB31	3.97	2022	2022-05	0.074546	0.246328	0.124562	0.027731	0.0491185	0.0252094	0.0325697	0.0421732	0.28085	0.885037	0.192733	0.256865	0.580815	0.443638	4.66175	21	0.885638	5.89784	18.5858	4.0474	5.39416	1143.05	441	2.59196
HC3B	2.1	2021	2021-01	0.251059	0.364091	0.13512	0.0434242	0.0561504	0	0.0136239	0.540772	0	0.387023	0.0719273	0.775061	0.580621	0.533606	2.46579	23	12.4378	0	8.90153	1.65433	17.8264	1284.73	529	2.4286
IF49	3	2022	2022-08	0.207858	0.315411	0.118554	0.0620032	0.0379185	0.116494	0.0643597	0.699623	1	0.461166	0.390287	0.466488	0.580368	0.533905	3.52233	21	14.6921	21	9.68448	8.19602	9.79624	1088.59	441	2.46847
GV15	0.58	2021	2021-06	0.329371	0.170988	0.455805	0.0319044	0.0925023	0.0215132	0.0731192	0.109234	0.0593422	0.600387	0.404138	0.316711	0.580284	0.473692	0.680969	23	2.51239	1.36487	13.8089	9.29517	7.28435	1238.57	529	2.34134
CZ15	0.12	2021	2021-08	0.299616	0.183122	0.181222	0.183567	0.277073	0.375633	0.279782	0.395056	0.976047	0.351476	0	0.93184	0.580047	0.457082	0.140882	20	7.90112	19.5209	7.02952	0	18.6368	1320.33	400	3.30082
IJ1B	0.81	2021	2021-06	0.253988	0.251758	0.149418	0.088956	0.215286	0.0422795	0.0726381	0.134738	0.128265	0.205112	0.5284	0.701508	0.579346	0.477843	0.950781	21	2.82949	2.69356	4.30734	11.0964	14.7317	1100.29	441	2.49498
BT23	0.88	2022	2022-06	0.257815	0	0.0718479	0.667367	0.314416	0.0723832	0.121433	1	0.0883962	0.908148	1	1	0.578901	0.673455	1.03283	11	11	0.972358	9.98963	11	11	345.886	121	2.85856
LJ13	0.5	2021	2021-07	0.376607	0.202343	0.184769	0.00359724	0.0108265	0.0605537	0.0824836	0.085872	0.218282	0.507407	0.267493	0.723932	0.578861	0.525104	0.586829	21	1.80331	4.58392	10.6555	5.61736	15.2026	1012.11	441	2.29504
LJ15	0.37	2021	2021-07	0.326492	0.235623	0.247958	0.0322795	0.0190406	0.134693	0.0581608	0.584639	0.805797	0.343149	0.608555	0.495415	0.578774	0.54525	0.434244	21	12.2774	16.9217	7.20614	12.7797	10.4037	998.851	441	2.26497
DS19	0.4	2022	2022-03	0.240592	0.0238729	0.3651	0.336223	0.362109	0.137899	0.130358	0.527323	0.467869	0.738742	0.159203	0.475099	0.578747	0.437488	0.46945	23	12.1284	10.761	16.9911	3.66168	10.9273	1491.27	529	2.81904
NS1B	0.21	2021	2021-02	0.426478	0.174369	0.247536	0.0647087	0.110743	0.07605	0.10341	0.110595	0.221419	0	0.102022	1	0.578513	0.425612	0.246446	22	2.43309	4.87122	0	2.24449	22	1348.74	484	2.78665
TT19	0.63	2022	2022-09	0.121448	0.0237829	0.325209	0.295671	0.315997	0.319455	0.307573	0.401585	0.653398	0.541581	0.440531	0.428717	0.578409	0.47371	0.739319	23	9.23644	15.0282	12.4564	10.1322	9.8605	1418.39	529	2.68126
HS2B	0.7	2022	2022-05	0.357821	0.0267081	0.442252	0.0386809	0.0463547	0.273478	0.256995	0.260494	0.535523	0.377318	0.686757	0.271859	0.578169	0.484502	0.821415	23	5.99135	12.317	8.6783	15.7954	6.25276	1296.78	529	2.45139
GW15	0.29	2022	2022-01	0.263484	0.20473	0.445447	0.0911011	0.0871367	0.11645	0.0925347	0.489568	0.466817	0.600049	0.369198	0.485019	0.577962	0.564554	0.340283	23	11.2601	10.7368	13.8011	8.49155	11.1554	1170.16	529	2.21202
CS1A	0.65	2022	2022-07	0.337072	0.026861	0.304302	0.19488	0.356348	0.159203	0.235995	0.0351295	0.0867904	0.354851	0.67441	0.158917	0.577719	0.470383	0.762655	23	0.807979	1.99618	8.16157	15.5114	3.6551	1297.54	529	2.45282
GV13	0.77	2021	2021-04	0.302125	0.180857	0.476376	0.0455362	0.0981922	0.0178293	0.0874161	0.0979243	0	0.760011	0.067173	0.376353	0.57749	0.437611	0.9034	23	2.25226	0	17.4802	1.54498	8.65613	1227.64	529	2.32069
BR21	1.15	2021	2021-11	0.321136	0.0338712	0.407129	0.0889531	0.131895	0.286157	0.206899	0.409146	0.934206	0.531742	0.335997	0.372844	0.577388	0.479396	1.3492	23	9.41035	21.4867	12.2301	7.72793	8.57541	1454.44	529	2.74942
BR21	1.15	2021	2021-08	0.283423	0.048277	0.409853	0.150875	0.131895	0.133421	0.206899	0.693958	0.0643337	0.794218	0.0535871	0.346248	0.5771	0.479396	1.3491	23	15.961	1.47967	18.267	1.2325	7.96371	1454.44	529	2.74942
IU19	0.3	2021	2021-09	0.26151	0.0279513	0.24368	0.456212	0.451108	0.127813	0.145262	0.696795	0.322055	0.177918	0.40195	0.73488	0.576699	0.538226	0.351903	23	16.0263	7.40727	4.09211	9.24486	16.9022	1389.42	529	2.62649
CU19	0.4	2022	2022-01	0.372042	0.102116	0.204984	0.191924	0.269089	0.366505	0.252201	0.203843	0.589682	0.293378	0.0200409	0.952214	0.576431	0.479634	0.469172	22	4.48454	12.973	6.45431	0.440899	20.9487	1192.61	484	2.46407
ET2B	0.45	2022	2022-10	0.350791	0.052493	0.399172	0.0731629	0.0869919	0.170105	0.198253	0.372014	0.420802	0.726995	0	0.611541	0.576294	0.388963	0.5278	23	8.55632	9.67845	16.7209	0	14.0655	1684.54	529	3.18439
LJ13	0.5	2021	2021-09	0.390888	0.184733	0.184701	0.0115986	0.0108265	0.098007	0.0824836	0.276877	0.460565	0.456637	0.411032	0.724335	0.576278	0.525104	0.586442	21	5.81442	9.67187	9.58937	8.63168	15.211	1012.11	441	2.29504
CU19	0.4	2022	2022-08	0.215038	0.05735	0.425616	0.225778	0.269089	0.221798	0.252201	0.293645	0.28223	0.753521	0.449638	0.233592	0.576071	0.479634	0.469129	22	6.46019	6.20907	16.5775	9.89203	5.13903	1192.61	484	2.46407
GE15	1	2022	2022-02	0.217945	0.532322	0.110643	0.0297906	0.0377298	0	0.00544909	0.311371	0	0.475146	0.322967	0.64553	0.575978	0.529763	1.17279	22	6.85017	0	10.4532	7.10528	14.2017	1079.83	484	2.23106
GW15	0.29	2021	2021-04	0.21908	0.235987	0.550167	0.0433861	0.0871367	0.0807059	0.0925347	0.233153	0.306908	0.876483	0.272891	0.0807993	0.575701	0.564554	0.340086	23	5.36251	7.05888	20.1591	6.27649	1.85838	1170.16	529	2.21202
CU19	0.4	2022	2022-10	0.237626	0.0567509	0.451767	0.162083	0.269089	0.088961	0.252201	0.124685	0	0.68732	0.455387	0.148418	0.57564	0.479634	0.469077	22	2.74306	0	15.121	10.0185	3.26519	1192.61	484	2.46407
MB19	2.52	2021	2021-05	0.276173	0.300856	0.158235	0.0255019	0.0322193	0.0359067	0.0486278	0.170111	0.0562645	0.191542	0.312408	0.877803	0.575562	0.52011	2.95513	21	3.57233	1.18155	4.02238	6.56058	18.4339	986.285	441	2.23647
EB19	6.81	2021	2021-04	0.15936	0.36333	0.0696275	0.0231579	0.0284104	0.00355129	0.0134939	0.367285	0.0922625	0	0.270931	1	0.57476	0.555324	7.98423	21	7.71298	1.93751	0	5.68956	21	1040.63	441	2.35969
IF15	2.5	2022	2022-10	0.0942133	0.56308	0.231255	0	0.0315791	0.0246233	0.0662677	0	0	1	0	0	0.574708	0.391852	2.93103	21	0	0	21	0	0	1204.99	441	2.73239
GW15	0.29	2021	2021-02	0.225884	0.207693	0.5711	0.0395191	0.0871367	0.127789	0.0925347	0.212372	0.517548	0.834124	0.360068	0	0.574653	0.564554	0.339995	23	4.88455	11.9036	19.1848	8.28157	0	1170.16	529	2.21202
DE29	1.25	2021	2021-05	0.310253	0.490698	0.197678	0.0175135	0.00888239	0.0469669	0.0523303	0.554288	0.147346	0.211805	0.862345	0.257749	0.574539	0.500179	1.46545	21	11.6401	3.09427	4.4479	18.1093	5.41274	938.608	441	2.12836
LJ15	0.37	2022	2022-03	0.312008	0.355894	0.149149	0.00380032	0.0190406	0.0921272	0.0581608	0.0688305	0.55115	0.38926	0.233288	0.843927	0.574333	0.54525	0.433751	21	1.44544	11.5741	8.17447	4.89904	17.7225	998.851	441	2.26497
GW15	0.29	2021	2021-03	0.201772	0.324555	0.53916	0.049011	0.0871367	0.0605574	0.0925347	0.26338	0.216768	0.984236	0	0.123287	0.574196	0.564554	0.339955	23	6.05775	4.98567	22.6374	0	2.83561	1170.16	529	2.21202
IB33	3.5	2021	2021-09	0.211672	0.281914	0.1022	0.0967517	0.0632326	0.0856929	0.0367732	1	1	0.191227	0.488737	0.442114	0.574102	0.46012	4.10281	21	21	21	4.01577	10.2635	9.28439	1189.67	441	2.69767
LX15	0.25	2021	2021-11	0.313066	0.0710301	0.505021	0.00756454	0.02731	0.0655747	0.0865126	0.0819675	0.361016	0.39708	0.593026	0.466457	0.57389	0.505016	0.293042	22	1.80328	7.94235	8.73575	13.0466	10.2621	1150.3	484	2.37665
HS2B	0.7	2022	2022-07	0.341017	0.0489778	0.415926	0.0229667	0.0463547	0.336754	0.256995	0.0643673	0.74023	0.462861	0.417422	0.447769	0.573506	0.484502	0.820436	23	1.48045	17.0253	10.6458	9.60071	10.2987	1296.78	529	2.45139
DE29	1.25	2022	2022-09	0.208482	0.869805	0.176542	0.00213326	0.00888239	0.0814456	0.0523303	0.067516	0.350665	0.820227	0.143368	0.504714	0.573332	0.500179	1.465	21	1.41784	7.36397	17.2248	3.01073	10.599	938.608	441	2.12836
CU19	0.4	2022	2022-11	0.319947	0.0494371	0.3378	0.15543	0.269089	0.272894	0.252201	0.107038	0.390792	0.446055	0.525574	0.519617	0.573186	0.479634	0.468782	22	2.35484	8.59742	9.81321	11.5626	11.4316	1192.61	484	2.46407
GE1A	1.33	2021	2021-05	0.201215	0.44442	0.182254	0.0940746	0.0397917	0.04253	0.0174681	1	0.505763	0.71751	0.392851	0	0.573174	0.541633	1.5587	22	22	11.1268	15.7852	8.64272	0	995.135	484	2.05606
LX15	0.25	2022	2022-04	0.137346	0.165718	0.721675	0.0211665	0.02731	0.0070297	0.0865126	0.229355	0	1	0.050501	0	0.572974	0.505016	0.292973	22	5.04582	0	22	1.11102	0	1150.3	484	2.37665
IG15	0.76	2022	2022-05	0.240915	0.391102	0.216776	0.0947741	0.108034	0.0247948	0.0403671	0.199584	0.204218	0.531355	0.685277	0.372961	0.572964	0.594168	0.890636	20	3.99169	4.08436	10.6271	13.7055	7.45923	794.489	400	1.98622
KS19	0.35	2021	2021-08	0.368236	0.0214415	0.401213	0.104787	0.101739	0.135798	0.150846	0.589059	0.246004	0.160378	0.332411	0.828362	0.572424	0.472301	0.410105	23	13.5484	5.65809	3.6887	7.64545	19.0523	1355.11	529	2.56164
GE1A	1.33	2021	2021-06	0.207641	0.463541	0.147469	0.0492863	0.0397917	0.00342769	0.0174681	0.448022	0.0407618	0.688532	0.283757	0.488317	0.57236	0.541633	1.55837	22	9.85648	0.89676	15.1477	6.24265	10.743	995.135	484	2.05606
KS19	0.35	2021	2021-06	0.381269	0.0321178	0.369668	0.117485	0.101739	0.187318	0.150846	0.660441	0.49622	0.0931723	0	1	0.572113	0.472301	0.410072	23	15.1901	11.4131	2.14296	0	23	1355.11	529	2.56164
FV29	0.33	2021	2021-10	0.264071	0.0825677	0.451472	0.116198	0.0944113	0.201988	0.217947	0.729611	0.551973	0.536757	0	0.736729	0.572	0.454141	0.386628	23	16.781	12.6954	12.3454	0	16.9448	1570.81	529	2.9694
BY31	1.3	2022	2022-10	0.0246855	0	0.035026	0.929036	0.841067	0.0816088	0.115014	1	0.223249	1	1	1	0.571953	0.685226	1.52306	11	11	2.45574	11	11	11	361.246	121	2.98551
LJ13	0.5	2022	2022-10	0.23805	0.219189	0.287086	0.00812454	0.0108265	0.0338952	0.0824836	0.193946	0.0458291	1	0.13018	0.118703	0.571819	0.525104	0.585773	21	4.07287	0.962412	21	2.73377	2.49277	1012.11	441	2.29504
GW15	0.29	2021	2021-05	0.237064	0.247818	0.46192	0.0879514	0.0871367	0.101753	0.0925347	0.472642	0.401069	0.764528	0.236438	0.421431	0.571633	0.564554	0.339732	23	10.8708	9.22458	17.5841	5.43808	9.69292	1170.16	529	2.21202
LR1B	0.77	2021	2021-09	0.148574	0.0166722	0.469245	0.115502	0.111484	0.279337	0.311279	0.507457	0.351903	0.792514	0.27643	0.328706	0.571285	0.504571	0.901967	23	11.6715	8.09376	18.2278	6.35788	7.56023	1340.96	529	2.53489
GW1A	0.5	2022	2022-07	0.247333	0.139862	0.534117	0.0759813	0.103302	0.113006	0.112428	0.160018	0.434118	0.695412	0.542346	0.0112311	0.571194	0.595493	0.585679	23	3.6804	9.9847	15.9945	12.474	0.258314	1112.54	529	2.10311
DE29	1.25	2021	2021-12	0.250515	0.629689	0.202522	0	0.00888239	0.0318274	0.0523303	0	0.0580692	0.568938	0.598749	0.201146	0.571141	0.500179	1.46418	21	0	1.21945	11.9477	12.5737	4.22407	938.608	441	2.12836
IF5B	0.86	2022	2022-10	0.178914	0.58764	0.182039	0.0211202	0.0275106	0.0223686	0.0374287	0.210925	0.187393	0.992701	0	0.360586	0.570936	0.517695	1.0073	21	4.42943	3.93525	20.8467	0	7.57231	1052.2	441	2.38594
IF49	3	2022	2022-09	0.171017	0.32348	0.109019	0.0453271	0.0379185	0.0685082	0.0643597	0.481937	0.505428	0.707708	0.323632	0.577215	0.570868	0.533905	3.51378	21	10.1207	10.614	14.8619	6.79626	12.1215	1088.59	441	2.46847
GF19	1.07	2021	2021-09	0.244979	0.34014	0.150263	0.265243	0.238903	0.138754	0.130518	0.744248	0.653892	0.20969	0.624016	0.42392	0.570755	0.515295	1.25321	23	17.1177	15.0395	4.82286	14.3524	9.75016	1390.14	529	2.62786
LJ13	0.5	2022	2022-09	0.304578	0.203429	0.211125	0.0202206	0.0108265	0.0708057	0.0824836	0.482699	0.284601	0.763482	0.25864	0.56803	0.570158	0.525104	0.585524	21	10.1367	5.97663	16.0331	5.43143	11.9286	1012.11	441	2.29504
NZ19	0.21	2021	2021-03	0.314887	0.181945	0.323426	0.0927973	0.0720471	0.0906794	0.143466	0.56235	0.236221	0.517221	0	0.815011	0.569778	0.421082	0.245896	23	12.9341	5.43309	11.8961	0	18.7453	1439.27	529	2.72075
GR13	0.69	2021	2021-05	0.275453	0.151163	0.376251	0.0719928	0.0595323	0.469023	0.382276	0.323354	0.666501	0.834326	0.0200146	0.439038	0.569442	0.465338	0.807875	23	7.43714	15.3295	19.1895	0.460335	10.0979	1252.45	529	2.36759
GE1A	1.33	2022	2022-05	0.272514	0.383447	0.163695	0.0343373	0.0397917	0.0478725	0.0174681	0.263789	0.569295	0.395975	0.740715	0.260539	0.569411	0.541633	1.55719	22	5.80335	12.5245	8.71146	16.2957	5.73186	995.135	484	2.05606
DD29	1.45	2021	2021-09	0.287074	0.567222	0.180466	0.045293	0.0269961	0.023145	0.056337	0.556967	0	0.0965416	0.209899	1	0.569341	0.56314	1.69766	21	11.6963	0	2.02737	4.40787	21	914.823	441	2.07443
BW2A	1.16	2022	2022-09	0.0957503	0.000893001	0.156723	0.660035	0.67563	0.13044	0.156156	0.727091	0.193259	0.682722	0	0.763612	0.569026	0.387346	1.35802	21	15.2689	4.05844	14.3372	0	16.0358	1424.73	441	3.23068
HS3B	0.4	2021	2021-02	0.41265	0.0546453	0.309764	0.0835492	0.0662496	0.120621	0.227283	0.382896	0.284847	0.178497	0.132144	0.970181	0.568685	0.464468	0.468242	23	8.8066	6.55148	4.10542	3.03931	22.3142	1347.02	529	2.54634
BR15	0.84	2021	2021-02	0.391241	0	0.0833426	0.447176	0.476389	0	0.0802557	0.610898	0	0.545256	#NUM!	0.913075	0.56854	0.58507	0.983272	12	7.33078	0	6.54307	#NUM!	10.9569	358.048	144	2.48644
GE15	1	2021	2021-11	0.249349	0.484209	0.115786	0.0264167	0.0377298	0.00345412	0.00544909	0.257048	0.156319	0.341803	0.551087	0.597268	0.568062	0.529763	1.17042	22	5.65506	3.43902	7.51967	12.1239	13.1399	1079.83	484	2.23106
GE15	1	2021	2021-04	0.208271	0.485799	0.138997	0.0419712	0.0377298	0.017053	0.00544909	0.507489	0.77175	0.516219	0.543548	0.379418	0.56791	0.529763	1.17037	22	11.1648	16.9785	11.3568	11.9581	8.34719	1079.83	484	2.23106
FW19	0.53	2021	2021-05	0.416315	0.0700725	0.2981	0.104822	0.0826931	0.100193	0.138831	0.566199	0.169237	0.263947	0.550564	0.584004	0.567689	0.48179	0.620263	23	13.0226	3.89245	6.07078	12.663	13.4321	1240.08	529	2.34419
GW1A	0.5	2021	2021-04	0.215052	0.213232	0.493598	0.112379	0.103302	0.0971699	0.112428	0.463382	0.307774	0.904547	0.165374	0.263571	0.567659	0.595493	0.585149	23	10.6578	7.0788	20.8046	3.8036	6.06214	1112.54	529	2.10311
IU19	0.3	2022	2022-07	0.193101	0.0235984	0.324686	0.437236	0.451108	0.116876	0.145262	0.635281	0.202659	0.625534	0.530319	0.197437	0.567401	0.538226	0.351066	23	14.6115	4.66115	14.3873	12.1973	4.54105	1389.42	529	2.62649
HS21	1.58	2021	2021-11	0.407641	0.0304648	0.342427	0.0267104	0.0350051	0.267031	0.225783	0.301524	0.671168	0.547108	0.558727	0.269441	0.56737	0.502306	1.84893	23	6.93505	15.4369	12.5835	12.8507	6.19714	1292.2	529	2.44273
LF19	1.65	2022	2022-02	0.239	0.261829	0.271708	0.0515971	0.0652014	0.0652018	0.0706643	0.423965	0.272724	0.142772	0.769032	0.553903	0.56735	0.507166	1.93084	21	8.90327	5.72721	2.9982	16.1497	11.632	1159.26	441	2.62871
FW21	0.8	2021	2021-08	0.206851	0.0519341	0.189556	0.0308161	0.0769756	0.164782	0.186925	0.109431	0.198141	0.788042	0.901049	0.970709	0.567336	0.633574	0.936161	12	1.31317	2.37769	9.45651	10.8126	11.6485	387.787	144	2.69297
KS19	0.35	2022	2022-07	0.282643	0.0269376	0.439624	0.109766	0.101739	0.0986183	0.150846	0.617049	0.0654336	0.601744	0.161289	0.619363	0.567291	0.472301	0.409566	23	14.1921	1.50497	13.8401	3.70965	14.2454	1355.11	529	2.56164
CS1A	0.65	2022	2022-02	0.182084	0.0824997	0.293573	0.379586	0.356348	0.263241	0.235995	0.51605	0.368912	1	0	0.205691	0.567221	0.470383	0.760608	23	11.8691	8.48498	23	0	4.7309	1297.54	529	2.45282
NF15	0.7	2022	2022-03	0.301853	0.317045	0.302968	0.0588589	0.0769177	0.0409215	0.0600122	0.210731	0.17309	0.335001	0.800021	0.0643621	0.567125	0.511415	0.819096	23	4.8468	3.98107	7.70502	18.4005	1.48033	1334.73	529	2.52312
GF19	1.07	2021	2021-03	0.219224	0.35239	0.149186	0.240366	0.238903	0.108146	0.130518	0.55055	0.259133	0.447922	0.559768	0.439194	0.566624	0.515295	1.25189	23	12.6627	5.96005	10.3022	12.8747	10.1015	1390.14	529	2.62786
KS19	0.35	2021	2021-04	0.347897	0.0220445	0.410395	0.121963	0.101739	0.197468	0.150846	0.685617	0.545514	0.265259	0.313636	0.778402	0.566559	0.472301	0.409489	23	15.7692	12.5468	6.10095	7.21363	17.9032	1355.11	529	2.56164
LJ15	0.37	2022	2022-04	0.197551	0.430661	0.194263	0.0045817	0.0190406	0.0189236	0.0581608	0.0829827	0.11321	0.753647	0	0.684804	0.566384	0.54525	0.432869	21	1.74264	2.37741	15.8266	0	14.3809	998.851	441	2.26497
GE15	1	2021	2021-08	0.254732	0.461101	0.133728	0.0372216	0.0377298	0.0168121	0.00544909	0.431016	0.760847	0.31895	0.660647	0.428868	0.566258	0.529763	1.16988	22	9.48235	16.7386	7.01689	14.5342	9.43511	1079.83	484	2.23106
CB39	0.84	2021	2021-07	0.0941248	0.73367	0.216525	0.00720353	0.01971	0.0692823	0.0396785	0.048445	0.495082	0.656439	0.576744	0.257417	0.565903	0.518513	0.982608	21	1.01734	10.3967	13.7852	12.1116	5.40576	911.358	441	2.06657
LD19	1.92	2021	2021-08	0.366197	0.248474	0.178508	0.0230264	0.0314576	0.142726	0.0520886	0.184872	1	0	0.616192	0.620823	0.565654	0.628429	2.24582	21	3.88232	21	0	12.94	13.0373	854.077	441	1.93668
IF49	3	2022	2022-04	0.220943	0.314102	0.103555	0.0207564	0.0379185	0.114848	0.0643597	0.161198	0.983042	0.373606	0.401105	0.640663	0.56565	0.533905	3.50909	21	3.38515	20.6439	7.84572	8.4232	13.4539	1088.59	441	2.46847
GE15	1	2022	2022-04	0.296059	0.461362	0.121165	0.024783	0.0377298	7.94236e-05	0.00544909	0.230744	0.00359439	0.143475	0.659414	0.546778	0.565645	0.529763	1.16969	22	5.07637	0.0790765	3.15645	14.5071	12.0291	1079.83	484	2.23106
GD29	0.85	2022	2022-04	0.342049	0.357341	0.103791	0.0439747	0.0570351	0	0.00235607	0.202231	0	0	0.510807	0.717391	0.565444	0.521575	0.994188	23	4.65132	0	0	11.7486	16.5	1093.28	529	2.0667
IC39	2.6	2021	2021-10	0.214314	0.306207	0.10937	0.0839891	0.0804234	0.0340508	0.0439479	0.499615	0.267748	0.218984	0.793539	0.466738	0.565431	0.526481	3.04104	21	10.4919	5.62272	4.59866	16.6643	9.8015	1096.2	441	2.48571
HC3B	2.1	2022	2022-02	0.246133	0.316803	0.145132	0.06851	0.0561504	0.00983659	0.0136239	0.853172	0.166085	0.435638	0.192464	0.693209	0.565427	0.533606	2.45622	23	19.6229	3.81996	10.0197	4.42666	15.9438	1284.73	529	2.4286
HR11	1.15	2021	2021-11	0.501481	0.0806532	0.227649	0.0296342	0.0311706	0.39161	0.350234	0.364999	0.546182	0.454607	0.383777	0.638945	0.56542	0.453473	1.34507	23	8.39497	12.5622	10.456	8.82687	14.6957	1352.27	529	2.55627
GW15	0.29	2022	2022-06	0.258463	0.15124	0.504591	0.0861901	0.0871367	0.0698729	0.0925347	0.463177	0.258443	0.631308	0.534009	0.256723	0.565371	0.564554	0.339187	23	10.6531	5.9442	14.5201	12.2822	5.90462	1170.16	529	2.21202
DD29	1.45	2022	2022-01	0.227278	0.563824	0.260835	0.0151653	0.0269961	0.0430714	0.056337	0.148075	0.153252	0.828708	0.221019	0.471625	0.565349	0.56314	1.69593	21	3.10958	3.2183	17.4029	4.6414	9.90413	914.823	441	2.07443
GV15	0.58	2022	2022-05	0.387735	0.286959	0.299922	0.0893307	0.0925023	0.0312291	0.0731192	0.390973	0.0905414	0.395915	0	0.907951	0.565316	0.473692	0.678365	23	8.99239	2.08245	9.10605	0	20.8829	1238.57	529	2.34134
BR15	0.84	2021	2021-11	0.225014	0	0.112656	0.600574	0.476389	0.16828	0.0802557	0.835102	0.948554	0.811238	#NUM!	0.825764	0.564721	0.58507	0.98231	12	10.0212	11.3826	9.73485	#NUM!	9.90917	358.048	144	2.48644
MB19	2.52	2022	2022-05	0.236991	0.348794	0.196616	0.0620426	0.0322193	0.042079	0.0486278	1	0.168963	0.761929	0	0.590738	0.564189	0.52011	2.94653	21	21	3.54823	16.0005	0	12.4055	986.285	441	2.23647
CS1A	0.65	2022	2022-05	0.35508	0.0560845	0.152888	0.33128	0.356348	0.205391	0.235995	0.390273	0.212039	0.279892	0.320185	0.819017	0.564104	0.470383	0.76	23	8.97629	4.87689	6.43752	7.36426	18.8374	1297.54	529	2.45282
DS19	0.4	2021	2021-10	0.354397	0.0185156	0.242992	0.396016	0.362109	0.103894	0.130358	0.661813	0.192889	0.0611501	0.347888	0.862704	0.564014	0.437488	0.467682	23	15.2217	4.43645	1.40645	8.00142	19.8422	1491.27	529	2.81904
ER11	1.09	2021	2021-06	0.500655	0.0566115	0.202754	0.0436595	0.0529159	0.398142	0.437149	0.206084	0.631348	0.109818	0.433243	0.781088	0.56352	0.459877	1.27427	23	4.73993	14.521	2.52581	9.96459	17.965	1462.4	529	2.76446
JS29	0.65	2021	2021-01	0.277658	0.01726	0.281977	0.41595	0.366384	0.13518	0.173379	0.845767	0.132428	1	0	0	0.563196	0.403045	0.759823	23	19.4526	3.04584	23	0	0	1616.09	529	3.05499
GW15	0.29	2021	2021-06	0.308312	0.172755	0.411096	0.125237	0.0871367	0.0480202	0.0925347	0.673012	0.160679	0.320978	0.467717	0.617613	0.563159	0.564554	0.338995	23	15.4793	3.69563	7.38249	10.7575	14.2051	1170.16	529	2.21202
FV29	0.33	2021	2021-05	0.29813	0.0652825	0.422599	0.107299	0.0944113	0.200019	0.217947	0.673739	0.54631	0.311245	0.209346	0.839343	0.563083	0.454141	0.385745	23	15.496	12.5651	7.15863	4.81495	19.3049	1570.81	529	2.9694
GD29	0.85	2021	2021-07	0.244011	0.426694	0.111393	0.0540287	0.0570351	0	0.00235607	0.310259	0	0.720416	0	0.62339	0.562794	0.521575	0.993512	23	7.13595	0	16.5696	0	14.338	1093.28	529	2.0667
GR13	0.69	2021	2021-02	0.240468	0.129007	0.489091	0.0248225	0.0595323	0.255682	0.382276	0.053773	0.0889254	0.941341	0.182604	0.0384351	0.562327	0.465338	0.806402	23	1.23678	2.04528	21.6508	4.19988	0.884007	1252.45	529	2.36759
DT15	0.26	2021	2021-06	0.235199	0.0153654	0.401334	0.117631	0.085922	0.20177	0.196005	0.674098	0.586049	0.371912	0	0.913342	0.562264	0.369327	0.303857	23	15.5043	13.4791	8.55397	0	21.0069	1575.67	529	2.97858
IJ1B	0.81	2021	2021-11	0.244457	0.195704	0.169209	0.126304	0.215286	0.0471413	0.0726381	0.209742	0.154112	0.265348	0.659979	0.594941	0.561927	0.477843	0.946548	21	4.40459	3.23636	5.5723	13.8596	12.4938	1100.29	441	2.49498
IU19	0.3	2021	2021-11	0.271348	0.0307686	0.232028	0.466658	0.451108	0.0983125	0.145262	0.730657	0	0.113545	0.318866	0.812182	0.561919	0.538226	0.350573	23	16.8051	0	2.61153	7.33393	18.6802	1389.42	529	2.62649
NF15	0.7	2021	2021-07	0.3102	0.401734	0.226607	0.0611445	0.0769177	0.0565404	0.0600122	0.248685	0.384115	0.27088	0.561846	0.608509	0.561687	0.511415	0.817954	23	5.71976	8.83465	6.23024	12.9224	13.9957	1334.73	529	2.52312
GR11	1.03	2021	2021-01	0.403391	0.17013	0.203252	0.0490244	0.0496398	0.384895	0.391391	0.387209	0.605611	0.641823	0.211448	0.609276	0.561517	0.467597	1.20351	23	8.90581	13.9291	14.7619	4.8633	14.0134	1439.09	529	2.72039
IZ29	0.4	2021	2021-08	0.229814	0.0259436	0.200235	0.584058	0.613022	0.0814653	0.104398	0.178286	0.220088	0.126887	0.543718	0.692742	0.561371	0.4865	0.467364	23	4.10058	5.06202	2.91839	12.5055	15.9331	1245.17	529	2.35381
HR11	1.15	2021	2021-04	0.4067	0.0848674	0.26761	0.0448529	0.0311706	0.426108	0.350234	0.678821	0.638665	0.72443	0.351578	0.291827	0.561346	0.453473	1.34366	23	15.6129	14.6893	16.6619	8.08631	6.71202	1352.27	529	2.55627
FW2B	0.65	2021	2021-06	0.299953	0.299223	0.208264	0.0253587	0.100316	0.0642973	0.136854	0.0338819	0.126228	0.399224	0	0.887704	0.561323	0.410567	0.759458	23	0.779284	2.90323	9.18214	0	20.4172	1245.8	529	2.35502
NS1B	0.21	2021	2021-05	0.290854	0.14036	0.369001	0.0484497	0.110743	0.0486589	0.10341	0	0	0.676717	0.277165	0.457728	0.561235	0.425612	0.245358	22	0	0	14.8878	6.09763	10.07	1348.74	484	2.78665
GW15	0.29	2021	2021-07	0.223312	0.217255	0.515531	0.0619295	0.0871367	0.08294	0.0925347	0.332803	0.316902	0.85014	0.330605	0.214496	0.561141	0.564554	0.338819	23	7.65446	7.28876	19.5532	7.60392	4.93341	1170.16	529	2.21202
IZ29	0.4	2022	2022-01	0.144881	0.0568587	0.218434	0.608491	0.613022	0.109304	0.104398	0.245331	0.470917	0.830052	0	0.56047	0.560408	0.4865	0.467249	23	5.64261	10.8311	19.0912	0	12.8908	1245.17	529	2.35381
FW19	0.53	2021	2021-11	0.354621	0.0981446	0.322856	0.0335361	0.0826931	0.101694	0.138831	0.0091933	0.174463	0.541325	0.370514	0.513071	0.5603	0.48179	0.619088	23	0.211446	4.01264	12.4505	8.52182	11.8006	1240.08	529	2.34419
JJ15	0.49	2021	2021-03	0.153072	0.566161	0.287352	0.0929308	0.0702909	0	0.024715	0.58775	0	0.736551	0.18344	0.543651	0.559857	0.519894	0.572299	22	12.9305	0	16.2041	4.03568	11.9603	1123.01	484	2.32026
GF19	1.07	2021	2021-04	0.203515	0.407677	0.13696	0.233814	0.238903	0.0984907	0.130518	0.499536	0.134606	0.593221	0.26982	0.612582	0.559722	0.515295	1.24967	23	11.4893	3.09593	13.6441	6.20587	14.0894	1390.14	529	2.62786
GE15	1	2022	2022-03	0.191656	0.499896	0.125421	0.0286266	0.0377298	0.00836415	0.00544909	0.29263	0.378527	0.586768	0.476711	0.506831	0.55955	0.529763	1.16787	22	6.43785	8.3276	12.9089	10.4876	11.1503	1079.83	484	2.23106
LU15	0.45	2021	2021-05	0.249084	0.223569	0.45747	0.0440019	0.0523768	0.0728583	0.10409	0.352844	0.0672866	0.759139	0	0.624568	0.559365	0.437	0.525514	23	8.11542	1.54759	17.4602	0	14.3651	1296.79	529	2.45139
NF1A	0.72	2021	2021-02	0.362078	0.375685	0.218352	0.0637132	0.0606467	0.0727132	0.0544711	0.433784	0.654961	0	0.537081	0.749255	0.559098	0.519567	0.840765	23	9.97704	15.0641	0	12.3529	17.2329	1285.63	529	2.4303
BV39	0.31	2022	2022-03	0.284676	0.0136308	0.464245	0.18944	0.262158	0.168577	0.159376	0.122598	0.396056	0.299548	0.773318	0.230964	0.559077	0.458346	0.361994	23	2.81976	9.1093	6.8896	17.7863	5.31217	1196.68	529	2.26216
NF15	0.7	2021	2021-01	0.345465	0.40517	0.222893	0.0946882	0.0769177	0.0814905	0.0600122	0.805696	0.721213	0	0.552182	0.634979	0.5588	0.511415	0.817348	23	18.531	16.5879	0	12.7002	14.6045	1334.73	529	2.52312
HS2B	0.7	2021	2021-06	0.382594	0.0636822	0.369524	0.0979323	0.0463547	0.178053	0.256995	1	0.226808	0.251215	0.239584	0.757841	0.5584	0.484502	0.817264	23	23	5.21659	5.77795	5.51043	17.4304	1296.78	529	2.45139
GR13	0.69	2021	2021-01	0.408928	0.137719	0.259866	0.0322609	0.0595323	0.4087	0.382276	0.0962837	0.503189	0.426035	0.118669	0.852223	0.558124	0.465338	0.805532	23	2.21452	11.5734	9.79881	2.72938	19.6011	1252.45	529	2.36759
GW15	0.29	2022	2022-04	0.248654	0.209058	0.470373	0.132135	0.0871367	0.0848993	0.0925347	0.710082	0.325668	0.692375	0.355863	0.388804	0.558112	0.564554	0.338556	23	16.3319	7.49037	15.9246	8.18484	8.94248	1170.16	529	2.21202
CS15	0.53	2022	2022-02	0.238857	0.179685	0.261934	0.154174	0.3358	0.195373	0.225466	0	0.251411	1	0	0.322246	0.558028	0.402117	0.618726	22	0	5.53105	22	0	7.08941	1429.55	484	2.95363
IF1A	3.2	2021	2021-11	0.224405	0.261912	0.111071	0.0426131	0.0504381	0.0510541	0.063177	0.319917	0.303757	0.0429817	0.72643	0.688646	0.557753	0.449691	3.73544	21	6.71827	6.3789	0.902616	15.255	14.4616	1201.91	441	2.72543
HC3B	2.1	2021	2021-04	0.223205	0.392309	0.156298	0.0803004	0.0561504	0.0197489	0.0136239	1	0.333449	0.661917	0	0.601927	0.557678	0.533606	2.45134	23	23	7.66933	15.2241	0	13.8443	1284.73	529	2.4286
DD29	1.45	2021	2021-12	0.26357	0.560294	0.194437	0.00871308	0.0269961	0.0474289	0.056337	0.0605055	0.186766	0.384332	0.232571	0.908151	0.557107	0.56314	1.69234	21	1.27062	3.92208	8.07098	4.88399	19.0712	914.823	441	2.07443
JS1B	0.65	2022	2022-04	0.460116	0.0121142	0.212295	0.205188	0.256324	0.110348	0.153033	0.11234	0.3336	0.102432	0.642586	0.599229	0.556743	0.403738	0.758565	23	2.58382	7.6728	2.35594	14.7795	13.7823	1422.53	529	2.68909
CU19	0.4	2022	2022-09	0.182646	0.0517031	0.497334	0.173146	0.269089	0.2525	0.252201	0.15403	0.347462	0.848453	0.503828	0	0.556734	0.479634	0.466808	22	3.38866	7.64416	18.666	11.0842	0	1192.61	484	2.46407
KV1B	0.49	2022	2022-11	0.268422	0.0307237	0.481318	0.0636871	0.234077	0.223262	0.153654	0.0937121	0.69428	0.307384	0.658731	0.365367	0.55648	0.40737	0.571803	23	2.15538	15.9684	7.06984	15.1508	8.40344	1384.63	529	2.61745
FV29	0.33	2021	2021-11	0.290898	0.0650295	0.423156	0.0813431	0.0944113	0.243741	0.217947	0.510758	0.672022	0.359129	0.21241	0.837366	0.556372	0.454141	0.385081	23	11.7474	15.4565	8.25997	4.88542	19.2594	1570.81	529	2.9694
ES25	0.31	2021	2021-04	0.228461	0.0198548	0.427328	0.200936	0.108724	0.125634	0.184974	1	0.112309	1	0	0.163115	0.556319	0.493476	0.361738	22	22	2.4708	22	0	3.58854	1295.21	484	2.67605
JZ19	0.43	2021	2021-05	0.405362	0.0612761	0.299253	0.198972	0.138434	0.135937	0.163356	0.667742	0.280538	0.553204	0.340558	0.586473	0.556119	0.451097	0.501739	23	15.3581	6.45237	12.7237	7.83283	13.4889	1349.17	529	2.55041
FW19	0.53	2021	2021-01	0.445973	0.0522835	0.311705	0.0744188	0.0826931	0.068633	0.138831	0.328637	0.0593168	0.130601	0.664661	0.545022	0.555985	0.48179	0.618402	23	7.55866	1.36429	3.00382	15.2872	12.5355	1240.08	529	2.34419
IB31	3.97	2021	2021-07	0.183788	0.189981	0.0942103	0.0568794	0.0491185	0.033074	0.0325697	0.444965	0.378134	0.275108	0.664293	0.643228	0.555508	0.443638	4.63161	21	9.34427	7.94081	5.77727	13.9502	13.5078	1143.05	441	2.59196
HS3B	0.4	2021	2021-01	0.288027	0.0460768	0.431295	0.0494874	0.0662496	0.343372	0.227283	0.208782	0.810872	0.509079	0.268225	0.637512	0.554912	0.464468	0.466589	23	4.80199	18.6501	11.7088	6.16917	14.6628	1347.02	529	2.54634
CB39	0.84	2021	2021-09	0.144296	0.574075	0.202016	0.0453718	0.01971	0.066658	0.0396785	0.423458	0.475312	0.0787229	0.922351	0.385799	0.554819	0.518513	0.979814	21	8.89262	9.98155	1.65318	19.3694	8.10177	911.358	441	2.06657
CB19	1.06	2021	2021-11	0.615936	0.239409	0.150903	0.0951582	0.0885956	0.139587	0.132923	0.356001	0.518148	0.0285861	0.524638	0.918743	0.554816	0.582083	1.23643	21	7.47601	10.8811	0.600307	11.0174	19.2936	962.807	441	2.18324
KT15	0.43	2022	2022-01	0.189263	0.115489	0.426389	0.140666	0.128678	0.254867	0.20209	0.675421	0.584656	0.293614	0	1	0.554738	0.517606	0.501561	23	15.5347	13.4471	6.75312	0	23	1314	529	2.48393
CB39	0.84	2021	2021-12	0.120061	0.59823	0.229103	0.00687524	0.01971	0.0469985	0.0396785	0.0452194	0.32721	0.357786	0.870043	0.146115	0.554452	0.518513	0.979722	21	0.949607	6.87142	7.5135	18.2709	3.06842	911.358	441	2.06657
GE1A	1.33	2021	2021-12	0.187515	0.513277	0.133274	0.0389369	0.0397917	0.00143362	0.0174681	0.320475	0.0170485	0.779294	0	0.68759	0.553915	0.541633	1.55101	22	7.05044	0.375067	17.1445	0	15.127	995.135	484	2.05606
BR25	0.2	2021	2021-07	0.281781	0.0118122	0.458165	0.201549	0.173356	0.14266	0.188717	0.512709	0.209442	0.39435	0.680973	0.336419	0.553849	0.520874	0.233231	23	11.7923	4.81716	9.07005	15.6624	7.73765	1199.12	529	2.26677
MB19	2.52	2022	2022-10	0.220697	0.346154	0.210361	0.0472327	0.0322193	0.0408497	0.0486278	0.663648	0.146518	0.999136	0.0172058	0.48794	0.553511	0.52011	2.93845	21	13.9366	3.07687	20.9819	0.361322	10.2467	986.285	441	2.23647
GE1A	1.33	2022	2022-09	0.174678	0.447687	0.161878	0.0657928	0.0397917	0.0285088	0.0174681	0.651451	0.339024	0.837184	0.374209	0.286038	0.553435	0.541633	1.55082	22	14.3319	7.45852	18.418	8.2326	6.29283	995.135	484	2.05606
LJ15	0.37	2022	2022-09	0.340731	0.263354	0.178365	0.00313872	0.0190406	0.0496748	0.0581608	0.0568479	0.297179	0.297818	0.522028	0.740877	0.553331	0.54525	0.43142	21	1.1938	6.24075	6.25418	10.9626	15.5584	998.851	441	2.26497
LJ15	0.37	2021	2021-04	0.395866	0.16263	0.26644	0	0.0190406	0.0609444	0.0581608	0	0.364599	0.122292	0.836306	0.430225	0.553223	0.54525	0.431408	21	0	7.65657	2.56814	17.5624	9.03474	998.851	441	2.26497
EX1A	0.53	2021	2021-04	0.364014	0.0421961	0.389895	0.108478	0.0884604	0.30313	0.180266	0.854481	0.96261	0.678572	0	0.53125	0.553196	0.413818	0.617958	23	19.6531	22.14	15.6071	0	12.2188	1664.09	529	3.14574
FR11	1.17	2021	2021-06	0.301378	0.11474	0.333049	0.0805115	0.10025	0.187121	0.217633	0.239912	0.4037	0.765962	0	0.684783	0.553024	0.421599	1.36411	23	5.51796	9.28509	17.6171	0	15.75	1460.76	529	2.76136
DD29	1.45	2022	2022-08	0.228523	0.583581	0.234773	0.0175866	0.0269961	0.0950529	0.056337	0.180936	0.553038	0.813453	0.156362	0.642971	0.552996	0.56314	1.69055	21	3.79966	11.6138	17.0825	3.2836	13.5024	914.823	441	2.07443
DD29	1.45	2021	2021-06	0.276288	0.470513	0.215649	0.057739	0.0269961	0.0392615	0.056337	0.725883	0.123951	0.228608	0.526391	0.768699	0.552939	0.56314	1.69053	21	15.2435	2.60297	4.80076	11.0542	16.1427	914.823	441	2.07443
CZ1A	0.15	2021	2021-01	0.187804	0	0.147635	0.547924	0.33091	0.403525	0.301052	1	1	0.84489	1	1	0.552844	0.686816	0.174878	12	12	12	10.1387	12	12	367.124	144	2.54947
HC3B	2.1	2022	2022-05	0.248622	0.358604	0.121534	0.0569449	0.0561504	0.00846994	0.0136239	0.709148	0.14301	0.411074	0.0859126	0.886129	0.552681	0.533606	2.44819	23	16.3104	3.28923	9.45471	1.97599	20.381	1284.73	529	2.4286
CB39	0.84	2022	2022-03	0.151133	0.691407	0.165633	0.0111768	0.01971	0.0062939	0.0396785	0.0874836	0.0205683	0	0.668265	0.707733	0.552457	0.518513	0.979219	21	1.83716	0.431935	0	14.0336	14.8624	911.358	441	2.06657
GD29	0.85	2021	2021-04	0.223747	0.394922	0.136948	0.0592247	0.0570351	0.00685164	0.00235607	0.366088	0.675636	0.869321	0.234014	0.307429	0.552302	0.521575	0.990837	23	8.42002	15.5396	19.9944	5.38233	7.07087	1093.28	529	2.0667
NF15	0.7	2022	2022-01	0.273371	0.361426	0.295941	0.063003	0.0769177	0.0743167	0.0600122	0.279546	0.624289	0.55378	0.675206	0.114439	0.55203	0.511415	0.815926	23	6.42956	14.3586	12.7369	15.5297	2.6321	1334.73	529	2.52312
GR11	1.03	2021	2021-05	0.387734	0.21575	0.191019	0.0532929	0.0496398	0.510379	0.391391	0.43295	0.858194	0.710013	0	0.659158	0.551716	0.467597	1.20048	23	9.95786	19.7385	16.3303	0	15.1606	1439.09	529	2.72039
CZ15	0.12	2021	2021-03	0.317752	0.106618	0.212316	0.31033	0.277073	0.291992	0.279782	0.704943	0.758715	0.312219	0.417775	0.896452	0.551704	0.457082	0.139861	20	14.0989	15.1743	6.24439	8.35551	17.929	1320.33	400	3.30082
CS1A	0.65	2021	2021-08	0.422321	0.0277014	0.191162	0.303234	0.356348	0.187132	0.235995	0.317251	0.162527	0	0.664224	0.65216	0.5516	0.470383	0.757562	23	7.29678	3.73811	0	15.2772	14.9997	1297.54	529	2.45282
GD29	0.85	2022	2022-05	0.304079	0.365582	0.114818	0.0530179	0.0570351	0.010141	0.00235607	0.299398	1	0.279017	0.450107	0.581044	0.55135	0.521575	0.990594	23	6.88616	23	6.41739	10.3525	13.364	1093.28	529	2.0667
GD29	0.85	2021	2021-10	0.319165	0.376843	0.0916491	0.0378326	0.0570351	0.00402646	0.00235607	0.136237	0.397047	0.168158	0.367166	0.867511	0.551162	0.521575	0.990546	23	3.13345	9.13208	3.86763	8.44482	19.9528	1093.28	529	2.0667
IU19	0.3	2021	2021-03	0.238565	0.0232298	0.268987	0.458431	0.451108	0.141049	0.145262	0.703986	0.466555	0.328051	0.541189	0.566981	0.551108	0.538226	0.3496	23	16.1917	10.7308	7.54518	12.4474	13.0406	1389.42	529	2.62649
IS25	0.46	2021	2021-05	0.235097	0.036931	0.250162	0.446717	0.530747	0.176717	0.163092	0.350052	0.558351	0.458765	0.732551	0.168242	0.551093	0.456788	0.536051	23	8.05119	12.8421	10.5516	16.8487	3.86958	1449.82	529	2.74068
GR11	1.03	2021	2021-06	0.411877	0.145914	0.214093	0.0677491	0.0496398	0.377233	0.391391	0.587861	0.590188	0.604862	0.323688	0.565073	0.551076	0.467597	1.20028	23	13.5208	13.5743	13.9118	7.44481	12.9967	1439.09	529	2.72039
LU15	0.45	2021	2021-04	0.245415	0.147222	0.556248	0.0225517	0.0523768	0.0628829	0.10409	0.0680279	0.0163092	0.778747	0.341493	0.256264	0.550821	0.437	0.524361	23	1.56464	0.375112	17.9112	7.85434	5.89406	1296.79	529	2.45139
JJ15	0.49	2021	2021-07	0.245525	0.444028	0.258376	0.0697139	0.0702909	0.0314555	0.024715	0.419152	0.418629	0.217505	0.570377	0.727388	0.550713	0.519894	0.570955	22	9.22135	9.20983	4.7851	12.5483	16.0025	1123.01	484	2.32026
JJ15	0.49	2021	2021-11	0.14821	0.516331	0.303184	0.0615568	0.0702909	0.00680657	0.024715	0.359917	0.0905859	0.763845	0.341308	0.443259	0.550644	0.519894	0.570945	22	7.91817	1.99289	16.8046	7.50878	9.75169	1123.01	484	2.32026
DD29	1.45	2022	2022-06	0.218534	0.584151	0.262419	0.0119911	0.0269961	0.0387778	0.056337	0.104994	0.120231	0.935769	0.154497	0.461212	0.550583	0.56314	1.6895	21	2.20488	2.52485	19.6511	3.24443	9.68545	914.823	441	2.07443
LJ13	0.5	2022	2022-01	0.362265	0.235159	0.138099	0.006339	0.0108265	0.0890139	0.0824836	0.151322	0.40239	0.558396	0	1	0.550567	0.525104	0.582585	21	3.17777	8.45018	11.7263	0	21	1012.11	441	2.29504
FR11	1.17	2021	2021-04	0.390294	0	0.420485	0.0923815	0.10025	0.163767	0.217633	0.339733	0.321973	0.0697565	1	0	0.550494	0.421599	1.36322	23	7.81387	7.40538	1.6044	23	0	1460.76	529	2.76136
DS19	0.4	2021	2021-11	0.34176	0.0162326	0.253244	0.384159	0.362109	0.119324	0.130358	0.635143	0.317656	0.13639	0.428294	0.830163	0.550289	0.437488	0.466035	23	14.6083	7.30609	3.13697	9.85075	19.0937	1491.27	529	2.81904
XJ1B	0.43	2022	2022-10	0.320102	0.12955	0.315096	0.0319574	0.0155488	0.0778743	0.0794125	0.594442	0.301045	0.401265	1	0	0.550138	0.536699	0.500968	20	11.8888	6.0209	8.02529	20	0	881.264	400	2.20316
GD29	0.85	2022	2022-01	0.31525	0.367474	0.102337	0.0251531	0.0570351	0.000886704	0.00235607	0	0.0874374	0.196925	0.436176	0.735365	0.55001	0.521575	0.990252	23	0	2.01106	4.52927	10.0321	16.9134	1093.28	529	2.0667
IT2B	0.8	2021	2021-05	0.181851	0.00537302	0.558062	0.191264	0.462315	0.158033	0.145523	0.0863108	0.532984	0.446098	0.73493	0.136136	0.549837	0.436286	0.931961	23	1.98515	12.2586	10.2602	16.9034	3.13114	1529.1	529	2.89054
HC3B	2.1	2022	2022-06	0.248173	0.326524	0.13228	0.0637822	0.0561504	0.0412529	0.0136239	0.794295	0.696532	0.415503	0.167686	0.79828	0.549704	0.533606	2.44631	23	18.2688	16.0202	9.55657	3.85678	18.3604	1284.73	529	2.4286
IB33	3.5	2022	2022-01	0.115715	0.296597	0.096505	0.0557308	0.0632326	0.02785	0.0367732	0.465778	0.202845	0.713432	0.401783	0.547468	0.549541	0.46012	4.07702	21	9.78135	4.25974	14.9821	8.43744	11.4968	1189.67	441	2.69767
IS2A	0.55	2021	2021-01	0.205039	0.11004	0.307412	0.410871	0.495418	0.0575815	0.129157	0.472425	0	0.726752	0.350483	0.372929	0.549489	0.390088	0.640666	23	10.8658	0	16.7153	8.06112	8.57738	1630.21	529	3.08168
LX15	0.25	2021	2021-10	0.423121	0.0616233	0.420497	0.0175478	0.02731	0.14787	0.0865126	0.190144	0.868489	0.0194664	0.646923	0.648438	0.549473	0.505016	0.29121	22	4.18317	19.1068	0.42826	14.2323	14.2656	1150.3	484	2.37665
CS1A	0.65	2022	2022-03	0.324177	0.0483158	0.18496	0.319375	0.356348	0.185896	0.235995	0.359278	0.159174	0.408528	0.414352	0.679199	0.549444	0.470383	0.757142	23	8.26339	3.661	9.39614	9.53008	15.6216	1297.54	529	2.45282
GE1A	1.33	2022	2022-02	0.310002	0.43269	0.123436	0.0325406	0.0397917	0.0430513	0.0174681	0.241645	0.511962	0.226915	0.459772	0.825707	0.548918	0.541633	1.54902	22	5.31619	11.2632	4.99214	10.115	18.1656	995.135	484	2.05606
IU19	0.3	2021	2021-12	0.190363	0.03892	0.251957	0.461936	0.451108	0.168241	0.145262	0.715351	0.763412	0.643449	0.0784789	0.679964	0.548869	0.538226	0.349398	23	16.4531	17.5585	14.7993	1.80501	15.6392	1389.42	529	2.62649
IC39	2.6	2021	2021-08	0.207084	0.338134	0.0999909	0.04762	0.0804234	0.0273932	0.0439479	0.0683044	0.160927	0.279671	0.607238	0.657874	0.548807	0.526481	3.02807	21	1.43439	3.37947	5.8731	12.752	13.8154	1096.2	441	2.48571
GR11	1.03	2021	2021-03	0.337244	0.161457	0.310546	0.0128902	0.0496398	0.324342	0.391391	0	0.483725	0.929918	0.251647	0.171772	0.54833	0.467597	1.19943	23	0	11.1257	21.3881	5.78788	3.95077	1439.09	529	2.72039
LR1B	0.77	2021	2021-01	0.167845	0.0186297	0.371451	0.0998429	0.111484	0.259928	0.311279	0.383081	0.261397	0.524772	0.191474	0.799068	0.548317	0.504571	0.896661	23	8.81087	6.01213	12.0698	4.40389	18.3786	1340.96	529	2.53489
DE29	1.25	2022	2022-07	0.188415	0.745712	0.203546	0.00182043	0.00888239	0.0513087	0.0523303	0.0576151	0.17295	0.940191	0.378711	0.189187	0.548164	0.500179	1.45556	21	1.20992	3.63194	19.744	7.95292	3.97293	938.608	441	2.12836
GZ19	0.54	2022	2022-07	0.229911	0.233782	0.473626	0.11327	0.10713	0.103799	0.0936129	0.609503	0.553072	0.842059	0.477363	0	0.548078	0.505005	0.628789	23	14.0186	12.7207	19.3674	10.9794	0	1288.44	529	2.43561
KD19	2.42	2022	2022-05	0.253462	0.493393	0.217359	0.0481365	0.0503618	0.00516645	0.0174265	0.550791	0.0450552	0.0215526	0.787222	0.60465	0.548006	0.572877	2.81785	21	11.5666	0.946159	0.452605	16.5317	12.6977	1034.8	441	2.34649
DE29	1.25	2022	2022-05	0.194897	0.659431	0.218784	0.0063676	0.00888239	0.0489008	0.0523303	0.20153	0.15875	0.90144	0.542344	0.0111296	0.547925	0.500179	1.45547	21	4.23212	3.33376	18.9302	11.3892	0.233722	938.608	441	2.12836
NF1A	0.72	2021	2021-03	0.317545	0.320031	0.282977	0.0278625	0.0606467	0.0419607	0.0544711	0.0805393	0.362659	0.237167	0.675629	0.481779	0.5479	0.519567	0.838346	23	1.8524	8.34116	5.45485	15.5395	11.0809	1285.63	529	2.4303
LS15	0.5	2021	2021-11	0.116412	0.000852545	0.63053	0.0697943	0.0946858	0.302282	0.281443	0.220618	0.534946	0.803353	0.366219	0.293349	0.547831	0.395937	0.582175	23	5.07422	12.3038	18.4771	8.42303	6.74703	1459.92	529	2.75978
GR11	1.03	2021	2021-04	0.340516	0.125639	0.352671	0.0336955	0.0496398	0.320216	0.391391	0.222947	0.47542	0.915666	0.417665	0	0.547656	0.467597	1.19923	23	5.12779	10.9347	21.0603	9.60629	0	1439.09	529	2.72039
NF15	0.7	2021	2021-08	0.278066	0.470451	0.224543	0.0857567	0.0769177	0.0546718	0.0600122	0.657384	0.358869	0.517715	0.368591	0.623219	0.547395	0.511415	0.814953	23	15.1198	8.25398	11.9075	8.47758	14.334	1334.73	529	2.52312
BW2A	1.16	2021	2021-01	0.171257	0	0.507531	0.0576022	0.67563	0.385004	0.156156	0	0.610943	0.21593	1	0	0.547361	0.387346	1.35048	21	0	12.8298	4.53453	21	0	1424.73	441	3.23068
LK1B	1.67	2022	2022-04	0.220158	0.225986	0.200659	0.0286069	0.0234044	0.0421703	0.0478906	0.741348	0.278854	0.557333	0.453512	0.628493	0.547167	0.427126	1.94413	21	15.5683	5.85594	11.704	9.52375	13.1983	1226.05	441	2.78015
TT19	0.63	2022	2022-04	0.0798333	0.0399683	0.301112	0.323037	0.315997	0.340771	0.307573	0.471546	0.801103	0.843503	0.0597845	0.514257	0.546746	0.47371	0.733335	23	10.8456	18.4254	19.4006	1.37504	11.8279	1418.39	529	2.68126
FR1B	0.7	2021	2021-04	0.343412	0.0442273	0.40872	0.126784	0.0922667	0.051924	0.237881	0.429403	0	0.404726	0.638047	0.367094	0.546725	0.424261	0.814812	23	9.87627	0	9.3087	14.6751	8.44315	1368.03	529	2.58606
DE29	1.25	2021	2021-04	0.307308	0.498436	0.194927	0.0283991	0.00888239	0.0430747	0.0523303	0.898811	0.124394	0.229407	0.847671	0.289887	0.546696	0.500179	1.45501	21	18.875	2.61227	4.81755	17.8011	6.08763	938.608	441	2.12836
CB19	1.06	2022	2022-03	0.594149	0.256536	0.149998	0.0800038	0.0885956	0.143222	0.132923	0.259482	0.547601	0.222135	0.421645	0.93651	0.546678	0.582083	1.23384	21	5.44911	11.4996	4.66484	8.85454	19.6667	962.807	441	2.18324
KT15	0.43	2022	2022-06	0.21624	0.0446668	0.509979	0.0894865	0.128678	0.198216	0.20209	0.322171	0.346975	0.0909658	0.613238	0.697197	0.546588	0.517606	0.50051	23	7.40993	7.98042	2.09221	14.1045	16.0355	1314	529	2.48393
BV39	0.31	2021	2021-06	0.210405	0.0224284	0.543874	0.191969	0.262158	0.153972	0.159376	0.126696	0.3282	0.664925	0.627012	0.0703563	0.546478	0.458346	0.360822	23	2.91401	7.5486	15.2933	14.4213	1.6182	1196.68	529	2.26216
LJ15	0.37	2021	2021-05	0.434279	0.177485	0.200681	0.0303373	0.0190406	0.0475721	0.0581608	0.549463	0.284599	0	0.789954	0.662166	0.546032	0.54525	0.43061	21	11.5387	5.97658	0	16.589	13.9055	998.851	441	2.26497
GE1A	1.33	2021	2021-08	0.352111	0.338	0.17909	0.0129331	0.0397917	0.00514815	0.0174681	0	0.0612213	0.0370206	1	0.0444227	0.545908	0.541633	1.54782	22	0	1.34687	0.814452	22	0.9773	995.135	484	2.05606
JJ15	0.49	2021	2021-08	0.222765	0.443319	0.271511	0.0726352	0.0702909	0.0260618	0.024715	0.440367	0.346846	0.345284	0.572625	0.644096	0.545829	0.519894	0.570237	22	9.68806	7.63062	7.59624	12.5978	14.1701	1123.01	484	2.32026
BR11	1.8	2021	2021-10	0.168195	0.00527916	0.162111	0.62098	0.663087	0.0527621	0.0721959	0.333398	0.297599	0.479187	0.470012	0.57925	0.545787	0.36143	2.09472	23	7.66816	6.84479	11.0213	10.8103	13.3228	1534.13	529	2.90006
XJ1B	0.43	2022	2022-03	0.326731	0.347725	0.154738	0.0147706	0.0155488	0.0556644	0.0794125	0.243075	0.183355	0.35935	0.406962	0.930158	0.545367	0.536699	0.500352	20	4.86149	3.66709	7.187	8.13924	18.6032	881.264	400	2.20316
KT15	0.43	2021	2021-10	0.20556	0.0520572	0.503203	0.0832638	0.128678	0.221535	0.20209	0.27922	0.44481	0.171195	0.549246	0.721744	0.54517	0.517606	0.500327	23	6.42207	10.2306	3.93749	12.6326	16.6001	1314	529	2.48393
ER1B	0.61	2022	2022-03	0.281813	0.0423295	0.333786	0.0211955	0.0506164	0.722366	0.577781	0.0470738	0.86319	0.676493	0.17055	0.562716	0.544659	0.460659	0.709673	23	1.0827	19.8534	15.5593	3.92264	12.9425	1399.02	529	2.64464
IF1A	3.2	2021	2021-03	0.228298	0.296561	0.0894894	0.0947679	0.0504381	0.0915935	0.063177	1	0.69951	0.00611497	0.527764	0.841367	0.544632	0.449691	3.72285	21	21	14.6897	0.128414	11.083	17.6687	1201.91	441	2.72543
LX15	0.25	2022	2022-05	0.366326	0.10405	0.308008	0.057682	0.02731	0.0490733	0.0865126	0.625028	0.259261	0.214339	0.403835	0.890629	0.54459	0.505016	0.290844	22	13.7506	5.70374	4.71545	8.88437	19.5938	1150.3	484	2.37665
TT19	0.63	2021	2021-07	0.106525	0.0270872	0.321394	0.403908	0.315997	0.225161	0.307573	0.67829	0	0.649848	0.362799	0.442259	0.544574	0.47371	0.732925	23	15.6007	0	14.9465	8.34437	10.172	1418.39	529	2.68126
NC1B	2.32	2022	2022-02	0.218019	0.424894	0.174161	0.0545766	0.0730232	0.0378286	0.0524605	0.0358278	0.0578275	1	1	1	0.544398	0.701672	2.6989	11	0.394106	0.636103	11	11	11	250.726	121	2.07211
LF19	1.65	2021	2021-07	0.170798	0.304712	0.301318	0.0928108	0.0652014	0.0523052	0.0706643	0.941405	0.176647	0.509606	0.686186	0.287167	0.543765	0.507166	1.91916	21	19.7695	3.70958	10.7017	14.4099	6.03051	1159.26	441	2.62871
GF29	1.03	2022	2022-06	0.3123	0.181885	0.283723	0.148742	0.170692	0.076412	0.0736156	0.407731	0.472944	0	0.992432	0.145502	0.543738	0.502525	1.19802	23	9.37782	10.8777	0	22.8259	3.34655	1405.73	529	2.65733
GV15	0.58	2022	2022-01	0.335791	0.201751	0.372996	0.0343267	0.0925023	0.0329642	0.0731192	0.121119	0.0961128	0.577896	0.296937	0.630795	0.543386	0.473692	0.674549	23	2.78573	2.21059	13.2916	6.82955	14.5083	1238.57	529	2.34134
CB19	1.06	2022	2022-04	0.595003	0.258758	0.149623	0.0561847	0.0885956	0.145123	0.132923	0.107777	0.563011	0.214549	0.408285	0.943876	0.54337	0.582083	1.23279	21	2.26331	11.8232	4.50554	8.57399	19.8214	962.807	441	2.18324
DE29	1.25	2022	2022-11	0.239272	0.943062	0.139126	0.00141618	0.00888239	0.0433969	0.0523303	0.0448208	0.126294	0.636153	0.00443646	0.941918	0.543231	0.500179	1.45371	21	0.941238	2.65217	13.3592	0.0931658	19.7803	938.608	441	2.12836
GW1A	0.5	2022	2022-06	0.235277	0.173273	0.506237	0.101195	0.103302	0.183937	0.112428	0.370164	1	0.773517	0.370681	0.184861	0.542841	0.595493	0.581426	23	8.51377	23	17.7909	8.52567	4.25179	1112.54	529	2.10311
ES21	1.23	2021	2021-10	0.339099	0.0382206	0.356712	0.0818442	0.0905895	0.170013	0.179934	0.331914	0.462575	0.798676	0	0.714	0.542652	0.323338	1.43024	23	7.63403	10.6392	18.3695	0	16.422	1644.7	529	3.10906
MB19	2.52	2022	2022-07	0.25478	0.309987	0.155388	0.0356968	0.0322193	0.0390281	0.0486278	0.401651	0.113258	0.502972	0.252904	0.899092	0.542501	0.52011	2.93013	21	8.43468	2.37841	10.5624	5.31098	18.8809	986.285	441	2.23647
GD29	0.85	2022	2022-10	0.232203	0.368411	0.161812	0.118223	0.0570351	0.00119428	0.00235607	1	0.117768	0.807181	0.429276	0	0.542417	0.521575	0.988316	23	23	2.70865	18.5652	9.87335	0	1093.28	529	2.0667
GF19	1.07	2022	2022-06	0.238153	0.38511	0.122149	0.226915	0.238903	0.101995	0.130518	0.445816	0.179796	0.272831	0.38817	0.822621	0.542265	0.515295	1.24407	23	10.2538	4.1353	6.27511	8.92791	18.9203	1390.14	529	2.62786
LU1A	0.58	2022	2022-01	0.332159	0.0777514	0.381115	0.054469	0.0785105	0.192911	0.154108	0.353305	0.552967	0	0.448251	0.918768	0.542108	0.438181	0.674327	23	8.12602	12.7183	0	10.3098	21.1317	1417.26	529	2.67913
IU29	0.3	2021	2021-05	0.201446	0.0106002	0.207645	0.6074	0.558916	0.0891859	0.12377	0.890677	0.0311877	0.326757	0.400799	0.662903	0.542036	0.475164	0.348783	23	20.4856	0.717318	7.51542	9.21837	15.2468	1578.81	529	2.98452
MS15	0.35	2022	2022-06	0.390707	0.0562751	0.427831	0.038251	0.0708821	0.162522	0.297474	0.16683	0.11092	0.372894	0.697792	0.33178	0.542034	0.432348	0.406914	23	3.83709	2.55116	8.57655	16.0492	7.63093	1330.16	529	2.51447
NF15	0.7	2021	2021-04	0.26955	0.428795	0.246911	0.0671665	0.0769177	0.0533164	0.0600122	0.348683	0.340556	0.583127	0.48574	0.463823	0.541954	0.511415	0.81381	23	8.01971	7.83278	13.4119	11.172	10.6679	1334.73	529	2.52312
LJ15	0.37	2021	2021-12	0.276361	0.294306	0.174549	0.0297742	0.0190406	0.0478056	0.0581608	0.539264	0.285996	0.502749	0.425453	0.754339	0.54186	0.54525	0.430146	21	11.3245	6.00592	10.5577	8.93451	15.8411	998.851	441	2.26497
HC3B	2.1	2021	2021-07	0.228137	0.37767	0.130384	0.0616726	0.0561504	0.0102844	0.0136239	0.768024	0.173646	0.613241	0.0373142	0.813783	0.541758	0.533606	2.44131	23	17.6645	3.99386	14.1045	0.858226	18.717	1284.73	529	2.4286
GE1A	1.33	2021	2021-07	0.249372	0.437389	0.138111	0.0281929	0.0397917	0	0.0174681	0.188064	0	0.500339	0.43296	0.619697	0.541718	0.541633	1.54615	22	4.13741	0	11.0075	9.52511	13.6333	995.135	484	2.05606
BX29	0.71	2021	2021-12	0.220129	0.00627074	0.266983	0.506895	0.564496	0.184764	0.156285	0.262286	0.585845	0.621926	0.622036	0.178598	0.541511	0.469312	0.825342	23	6.03257	13.4744	14.3043	14.3068	4.10776	1355.74	529	2.56283
MS15	0.35	2021	2021-11	0.42382	0.151032	0.215838	0.0157553	0.0708821	0.2719	0.297474	0	0.278456	0.2774	0.188931	0.961569	0.541275	0.432348	0.406834	23	0	6.4045	6.3802	4.34542	22.1161	1330.16	529	2.51447
EX1A	0.53	2021	2021-08	0.43101	0.0263482	0.355489	0.126525	0.0884604	0.148375	0.180266	0.996638	0.471176	0.365549	0.375577	0.656026	0.541263	0.413818	0.616061	23	22.9227	10.8371	8.40763	8.63828	15.0886	1664.09	529	3.14574
KV1B	0.49	2021	2021-06	0.370364	0	0.593975	0	0.234077	0	0.153654	0	0	0	1	0	0.541186	0.40737	0.569554	23	0	0	0	23	0	1384.63	529	2.61745
GV13	0.77	2021	2021-08	0.228924	0.12671	0.623565	0.0721021	0.0981922	0.0195024	0.0874161	0.176938	0.00711238	0.975122	0.346455	0	0.541068	0.437611	0.894987	23	4.06957	0.163585	22.4278	7.96845	0	1227.64	529	2.32069
DS19	0.4	2021	2021-09	0.347135	0.0183008	0.21853	0.404094	0.362109	0.119004	0.130358	0.679981	0.315069	0.104385	0.355451	0.940353	0.540871	0.437488	0.464904	23	15.6396	7.24658	2.40085	8.17537	21.6281	1491.27	529	2.81904
BR25	0.2	2021	2021-10	0.298419	0.00988967	0.444741	0.153255	0.173356	0.137765	0.188717	0.318716	0.19305	0.302576	0.732897	0.380112	0.540777	0.520874	0.232447	23	7.33046	4.44014	6.95924	16.8566	8.74258	1199.12	529	2.26677
LD19	1.92	2022	2022-11	0.237922	0.372373	0.212546	0.0526579	0.0314576	0.0353418	0.0520886	1	0.125027	0.880475	0.234909	0.433473	0.54075	0.628429	2.23147	21	21	2.62558	18.49	4.93308	9.10293	854.077	441	1.93668
NF1A	0.72	2021	2021-10	0.28703	0.591427	0.157769	0.0259486	0.0606467	0.0038062	0.0544711	0.0616808	0	0.399677	0	1	0.540471	0.519567	0.836742	23	1.41866	0	9.19256	0	23	1285.63	529	2.4303
ER1B	0.61	2021	2021-10	0.418682	0.0237786	0.279774	0.0616524	0.0506164	0.558744	0.577781	0.539175	0.492173	0.140426	0.534055	0.761321	0.540406	0.460659	0.708894	23	12.401	11.32	3.22981	12.2833	17.5104	1399.02	529	2.64464
IU29	0.3	2022	2022-04	0.183222	0.0135623	0.201737	0.630887	0.558916	0.142759	0.12377	0.925118	0.598844	0.499507	0.23336	0.70462	0.540307	0.475164	0.348628	23	21.2777	13.7734	11.4887	5.36729	16.2063	1578.81	529	2.98452
LS11	0.83	2022	2022-10	0.241634	0.0160597	0.497536	0.147173	0.099655	0.250934	0.289866	0.845485	0.356087	0.0210822	0.863146	0.415664	0.540281	0.457921	0.96453	22	18.6007	7.83391	0.463809	18.9892	9.14462	1328.67	484	2.7452
BX29	0.71	2021	2021-05	0.218197	0.0165908	0.142729	0.685536	0.564496	0.11456	0.156285	0.809766	0.16773	0.632565	0	0.824428	0.540067	0.469312	0.825034	23	18.6246	3.85778	14.549	0	18.9618	1355.74	529	2.56283
ER1B	0.61	2021	2021-09	0.44354	0.0272252	0.242258	0.0509513	0.0506164	0.504505	0.577781	0.409011	0.369186	0.0430667	0.466519	0.899266	0.539951	0.460659	0.708811	23	9.40725	8.49129	0.990535	10.7299	20.6831	1399.02	529	2.64464
GV15	0.58	2022	2022-10	0.461646	0.176544	0.305682	0.0152265	0.0925023	0.069616	0.0731192	0.0274112	0.213806	0.136978	0.384775	0.886107	0.53984	0.473692	0.673932	23	0.630459	4.91755	3.1505	8.84983	20.3805	1238.57	529	2.34134
HS11	2.15	2021	2021-05	0.469587	0.0865328	0.232728	0.0410413	0.0314472	0.166316	0.209893	0.513967	0.203582	0.682891	0	0.835574	0.539627	0.342003	2.49806	23	11.8212	4.6824	15.7065	0	19.2182	1491.16	529	2.81883
ET21	0.88	2022	2022-11	0.362334	0.0164251	0.375326	0.109108	0.0784516	0.300173	0.220253	0.929593	1	1	0	0.209146	0.539283	0.407626	1.02237	23	21.3806	23	23	0	4.81036	1692.94	529	3.20027
CB19	1.06	2021	2021-06	0.506586	0.243539	0.197674	0.10843	0.0885956	0.160487	0.132923	0.440526	0.687521	1	0.4998	0	0.539183	0.582083	1.23146	21	9.25105	14.4379	21	10.4958	0	962.807	441	2.18324
KT13	0.55	2022	2022-03	0.297031	0.045073	0.488656	0.0501247	0.114696	0.165514	0.237626	0.174688	0.341146	0.267088	0.562923	0.645725	0.539174	0.440505	0.638964	23	4.01781	7.84636	6.14302	12.9472	14.8517	1458.13	529	2.75639
HS21	1.58	2021	2021-01	0.417169	0.0690385	0.200432	0.0507302	0.0350051	0.212748	0.225783	0.61913	0.415607	0.47899	0	1	0.539	0.502306	1.83549	23	14.24	9.55895	11.0168	0	23	1292.2	529	2.44273
KD19	2.42	2021	2021-10	0.207301	0.525076	0.218658	0.0717165	0.0503618	0.0057355	0.0174265	0.948267	0.0586596	0.397476	0.559407	0.584547	0.538974	0.572877	2.81129	21	19.9136	1.23185	8.34699	11.7475	12.2755	1034.8	441	2.34649
NF1A	0.72	2022	2022-03	0.31119	0.460733	0.183409	0.0408145	0.0606467	0.0500097	0.0544711	0.208158	0.439164	0.271013	0.325357	0.89388	0.538945	0.519567	0.836412	23	4.78764	10.1008	6.23331	7.48322	20.5592	1285.63	529	2.4303
LR11	0.95	2021	2021-11	0.16627	0.0372873	0.296503	0.0699867	0.110035	0.0988543	0.235344	0.229295	0.24688	0.861538	0	0.661448	0.538903	0.455917	1.10359	23	5.27377	5.67825	19.8154	0	15.2133	1499.33	529	2.83428
CB19	1.06	2021	2021-10	0.619154	0.237065	0.147525	0.0987322	0.0885956	0.130841	0.132923	0.378764	0.447269	0	0.538733	0.985097	0.538868	0.582083	1.23136	21	7.95403	9.39266	0	11.3134	20.687	962.807	441	2.18324
KS19	0.35	2021	2021-03	0.364303	0.0211925	0.389601	0.146037	0.101739	0.169854	0.150846	0.82095	0.411402	0.180659	0.340163	0.891546	0.538756	0.472301	0.406569	23	18.8818	9.46225	4.15516	7.82376	20.5056	1355.11	529	2.56164
ES23	0.59	2021	2021-09	0.354324	0.0178044	0.426001	0.0610195	0.0840708	0.222323	0.204605	0.38711	0.553841	0.357421	0.467001	0.690244	0.538653	0.400598	0.685341	23	8.90354	12.7384	8.22067	10.741	15.8756	1556.54	529	2.94243
LX15	0.25	2022	2022-10	0.252688	0.174532	0.275557	0.0164921	0.02731	0.0294827	0.0865126	0.178704	0.138456	0.604246	0	0.960496	0.538369	0.505016	0.290378	22	3.93148	3.04603	13.2934	0	21.1309	1150.3	484	2.37665
IU29	0.3	2021	2021-04	0.210836	0.0105517	0.193361	0.606175	0.558916	0.0998257	0.12377	0.888881	0.143927	0.237753	0.403541	0.763756	0.538324	0.475164	0.348449	23	20.4443	3.31033	5.46831	9.28144	17.5664	1578.81	529	2.98452
NF1A	0.72	2021	2021-08	0.229536	0.481067	0.283586	0.0658884	0.0606467	0.100726	0.0544711	0.455217	0.921222	0.705872	0.274737	0.479257	0.538205	0.519567	0.836252	23	10.47	21.1881	16.2351	6.31895	11.0229	1285.63	529	2.4303
FW19	0.53	2021	2021-04	0.267223	0.155912	0.325487	0.0332763	0.0826931	0.0561584	0.138831	0.0071633	0.01587	0.934266	0	0.505532	0.538065	0.48179	0.615552	23	0.164756	0.36501	21.4881	0	11.6272	1240.08	529	2.34419
KS19	0.35	2021	2021-07	0.385918	0.0176329	0.388236	0.0917586	0.101739	0.185415	0.150846	0.515822	0.486977	0.0692011	0.450995	0.898972	0.537931	0.472301	0.406483	23	11.8639	11.2005	1.59162	10.3729	20.6764	1355.11	529	2.56164
LV19	0.72	2022	2022-04	0.289124	0.0227016	0.482647	0.110213	0.114492	0.182053	0.20943	0.437699	0.302846	0.749078	0.584033	0.307829	0.537869	0.400235	0.83618	21	9.19167	6.35977	15.7306	12.2647	6.46441	1297.65	441	2.94251
LJ15	0.37	2022	2022-05	0.349291	0.112187	0.388415	0	0.0190406	0	0.0581608	0	0	0.270568	0.993694	0	0.537792	0.54525	0.429695	21	0	0	5.68192	20.8676	0	998.851	441	2.26497
IC29	6	2022	2022-05	0.167006	0.23547	0.103721	0.0658508	0.0519153	0.00766505	0.024206	0.479388	0.0697068	0.545378	0.529056	0.582516	0.537557	0.439962	6.9676	21	10.0671	1.46384	11.4529	11.1102	12.2328	1111.11	441	2.51953
NF15	0.7	2021	2021-05	0.262927	0.471184	0.237289	0.0557038	0.0769177	0.0375779	0.0600122	0.158339	0.127915	0.634001	0.366529	0.532396	0.53714	0.511415	0.812799	23	3.6418	2.94205	14.582	8.43016	12.2451	1334.73	529	2.52312
LR1B	0.77	2022	2022-06	0.179854	0.00603315	0.484355	0.149653	0.111484	0.328852	0.311279	0.778697	0.582791	0.357914	0.738162	0.256031	0.536948	0.504571	0.894035	23	17.91	13.4042	8.23203	16.9777	5.88872	1340.96	529	2.53489
TT19	0.63	2021	2021-06	0.106909	0.0313864	0.277725	0.355949	0.315997	0.341201	0.307573	0.555685	0.804082	0.647063	0.261666	0.597276	0.536756	0.47371	0.731447	23	12.7808	18.4939	14.8825	6.01832	13.7373	1418.39	529	2.68126
KT15	0.43	2021	2021-09	0.147875	0.0534746	0.606552	0.109911	0.128678	0.133197	0.20209	0.463144	0.074187	0.604526	0.536972	0.34736	0.536529	0.517606	0.499212	23	10.6523	1.7063	13.9041	12.3504	7.98928	1314	529	2.48393
DD29	1.45	2022	2022-04	0.22401	0.458918	0.320287	0.00760634	0.0269961	0.0348014	0.056337	0.045485	0.0896485	0.868716	0.564335	0.0807684	0.53649	0.56314	1.68337	21	0.955184	1.88262	18.243	11.851	1.69614	914.823	441	2.07443
IS25	0.46	2021	2021-02	0.266149	0.0159848	0.287703	0.329585	0.530747	0.190257	0.163092	0.0841925	0.621506	0.348914	0.88424	0	0.536344	0.456788	0.534016	23	1.93643	14.2946	8.02503	20.3375	0	1449.82	529	2.74068
IT2B	0.8	2021	2021-01	0.24924	0.00025151	0.558322	0.149728	0.462315	0.164428	0.145523	0.0103791	0.593953	0	0.987592	0.135526	0.536172	0.436286	0.928681	23	0.23872	13.6609	0	22.7146	3.1171	1529.1	529	2.89054
HC3B	2.1	2022	2022-09	0.213725	0.370578	0.141821	0.0575238	0.0561504	0.0166205	0.0136239	0.716357	0.280628	0.755471	0.0553904	0.720282	0.536073	0.533606	2.43773	23	16.4762	6.45445	17.3758	1.27398	16.5665	1284.73	529	2.4286
GF29	1.03	2022	2022-11	0.298658	0.179459	0.296196	0.134341	0.170692	0.0766013	0.0736156	0.296786	0.478477	0.10549	1	0.0858763	0.53603	0.502525	1.19563	23	6.82608	11.005	2.42627	23	1.97515	1405.73	529	2.65733
IJ1B	0.81	2022	2022-01	0.192537	0.118375	0.274781	0.215973	0.215286	0.032308	0.0726381	0.389823	0.075253	0.593465	0.8415	0.0264786	0.53567	0.477843	0.940168	21	8.18629	1.58031	12.4628	17.6715	0.55605	1100.29	441	2.49498
JJ15	0.49	2022	2022-03	0.183287	0.496555	0.278861	0.0119941	0.0702909	0.0068347	0.024715	0	0.0909603	0.566918	0.403964	0.597494	0.535533	0.519894	0.568723	22	0	2.00113	12.4722	8.88721	13.1449	1123.01	484	2.32026
DE29	1.25	2021	2021-07	0.29339	0.55	0.180731	0.023599	0.00888239	0.0219801	0.0523303	0.74689	0	0.312612	0.74988	0.455772	0.535297	0.500179	1.45074	21	15.6847	0	6.56486	15.7475	9.57122	938.608	441	2.12836
GF29	1.03	2022	2022-10	0.275973	0.195811	0.314159	0.121358	0.170692	0.0690863	0.0736156	0.196759	0.258852	0.280912	0.948999	0	0.535153	0.502525	1.19536	23	4.52547	5.9536	6.46098	21.827	0	1405.73	529	2.65733
MZ1A	0.61	2021	2021-12	0.258929	0.273271	0.337734	0.0320033	0.0400342	0.0257733	0.168146	0.284467	0	0.740713	0	0.782547	0.535143	0.392102	0.707931	23	6.54273	0	17.0364	0	17.9986	1405.65	529	2.65718
HS2B	0.7	2021	2021-02	0.41711	0.048908	0.343375	0.0284073	0.0463547	0.225577	0.256995	0.132271	0.380556	0.0755154	0.418267	0.932571	0.535017	0.484502	0.812354	23	3.04223	8.7528	1.73685	9.62014	21.4491	1296.78	529	2.45139
BJ1B	1.09	2021	2021-08	0.296625	0.351268	0.140094	0.283604	0.284251	0.107929	0.100056	0.638644	0.625262	0.47311	0.686113	0.661274	0.534979	0.48682	1.26494	19	12.1342	11.88	8.98909	13.0361	12.5642	1142.01	361	3.16345
LJ15	0.37	2021	2021-03	0.432874	0.110166	0.295548	0	0.0190406	0.0389962	0.0581608	0	0.233294	0.00447243	1	0.327557	0.534894	0.54525	0.429373	21	0	4.89918	0.0939211	21	6.8787	998.851	441	2.26497
BX29	0.71	2022	2022-11	0.164562	0.0104703	0.269502	0.53343	0.564496	0.191431	0.156285	0.343606	0.625552	0.927977	0.36891	0.165508	0.534834	0.469312	0.82392	23	7.90295	14.3877	21.3435	8.48493	3.80669	1355.74	529	2.56283
LS13	0.66	2021	2021-08	0.109872	0.0166284	0.590382	0.159262	0.0910102	0.253425	0.294168	1	0.235214	0.990051	0	0.418573	0.534638	0.422319	0.765858	23	23	5.40992	22.7712	0	9.62718	1532.27	529	2.89655
IU19	0.3	2022	2022-10	0.135872	0.0324182	0.338116	0.414585	0.451108	0.177365	0.145262	0.561852	0.863016	1	0.270221	0.108339	0.534614	0.538226	0.348115	23	12.9226	19.8494	23	6.21507	2.49181	1389.42	529	2.62649
LJ15	0.37	2021	2021-11	0.337139	0.233737	0.210378	0.0552127	0.0190406	0.0667486	0.0581608	1	0.399322	0.309253	0.614437	0.627965	0.534557	0.54525	0.429336	21	21	8.38577	6.49432	12.9032	13.1873	998.851	441	2.26497
GW1A	0.5	2022	2022-08	0.200318	0.213212	0.485616	0.0879732	0.103302	0.058592	0.112428	0.259967	0	1	0.165475	0.313281	0.534051	0.595493	0.580108	23	5.97925	0	23	3.80593	7.20546	1112.54	529	2.10311
NF1A	0.72	2022	2022-09	0.246372	0.357802	0.330095	0.0815589	0.0606467	0.0377051	0.0544711	0.609623	0.322209	0.616206	0.581599	0.286762	0.533946	0.519567	0.835332	23	14.0213	7.4108	14.1727	13.3768	6.59553	1285.63	529	2.4303
IF5B	0.86	2022	2022-01	0.177905	0.504985	0.19962	0.00912435	0.0275106	0.0165582	0.0374287	0	0.0934828	1	0.451208	0.0722822	0.53385	0.517695	0.997733	21	0	1.96314	21	9.47537	1.51793	1052.2	441	2.38594
GV15	0.58	2021	2021-04	0.272792	0.134881	0.5036	0.0850978	0.0925023	0.0729821	0.0731192	0.370207	0.224615	0.798604	0.529966	0.135432	0.533601	0.473692	0.672846	23	8.51475	5.16615	18.3679	12.1892	3.11494	1238.57	529	2.34134
IF5B	0.86	2021	2021-04	0.316215	0.456652	0.157077	0.023903	0.0275106	0.0118072	0.0374287	0.259856	0.016695	0	0.715055	0.769924	0.533598	0.517695	0.997668	21	5.45697	0.350596	0	15.0162	16.1684	1052.2	441	2.38594
EB19	6.81	2022	2022-05	0.120145	0.292739	0.102478	0.0261939	0.0284104	0.0384911	0.0134939	0.441321	1	0.462547	0.77344	0.244545	0.533339	0.555324	7.89961	21	9.26774	21	9.71348	16.2422	5.13544	1040.63	441	2.35969
IS25	0.46	2021	2021-08	0.290152	0.0439996	0.172289	0.478998	0.530747	0.124931	0.163092	0.423322	0.316798	0.263997	0.68136	0.51724	0.533279	0.456788	0.533592	23	9.73641	7.28635	6.07194	15.6713	11.8965	1449.82	529	2.74068
XJ1B	0.43	2022	2022-07	0.34311	0.286461	0.168074	0.0046167	0.0155488	0.0707606	0.0794125	0.0354887	0.26335	0.255779	0.573487	0.852801	0.533273	0.536699	0.498792	20	0.709774	5.26699	5.11559	11.4697	17.056	881.264	400	2.20316
DD29	1.45	2022	2022-05	0.223878	0.538433	0.25104	0.0176024	0.0269961	0.0705437	0.056337	0.181152	0.36454	0.870336	0.304116	0.536027	0.533272	0.56314	1.68197	21	3.80418	7.65533	18.2771	6.38643	11.2566	914.823	441	2.07443
IF49	3	2022	2022-07	0.268097	0.282536	0.0911422	0.0733634	0.0379185	0.0796498	0.0643597	0.847916	0.620261	0.0580428	0.661884	0.784805	0.533011	0.533905	3.47971	21	17.8062	13.0255	1.2189	13.8996	16.4809	1088.59	441	2.46847
NF15	0.7	2021	2021-09	0.300025	0.372753	0.245404	0.0855767	0.0769177	0.0531975	0.0600122	0.654395	0.338949	0.349038	0.643352	0.474567	0.532949	0.511415	0.811919	23	15.0511	7.79583	8.02786	14.7971	10.915	1334.73	529	2.52312
KD19	2.42	2021	2021-12	0.207774	0.516389	0.217582	0.0582545	0.0503618	0.00848312	0.0174265	0.721345	0.124347	0.393623	0.62187	0.601208	0.532913	0.572877	2.80689	21	15.1482	2.61129	8.26608	13.0593	12.6254	1034.8	441	2.34649
IU19	0.3	2022	2022-11	0.234519	0.0139285	0.354445	0.241264	0.451108	0.189913	0.145262	0	1	0.354524	0.815489	0	0.532823	0.538226	0.347954	23	0	23	8.15405	18.7562	0	1389.42	529	2.62649
IU19	0.3	2022	2022-06	0.216762	0.0192647	0.31331	0.40997	0.451108	0.174258	0.145262	0.546891	0.829097	0.470715	0.658122	0.272917	0.532805	0.538226	0.347952	23	12.5785	19.0692	10.8264	15.1368	6.27709	1389.42	529	2.62649
MB19	2.52	2022	2022-09	0.23949	0.287345	0.19521	0.0361774	0.0322193	0.0571682	0.0486278	0.412568	0.44447	0.725552	0.40046	0.601258	0.532721	0.52011	2.92274	21	8.66393	9.33388	15.2366	8.40965	12.6264	986.285	441	2.23647
HR11	1.15	2021	2021-01	0.3099	0.0890796	0.301206	0.026195	0.0311706	0.560893	0.350234	0.294081	1	1	0.319396	0	0.532721	0.453473	1.33379	23	6.76387	23	23	7.3461	0	1352.27	529	2.55627
RU19	0.9	2021	2021-06	0.433241	0.129777	0.192515	0.0994967	0.0448601	0.358805	0.50528	0.853348	0.158318	0.578298	0	0.913587	0.532675	0.358073	1.04382	23	19.627	3.64132	13.3009	0	21.0125	1439.82	529	2.72178
DD29	1.45	2022	2022-07	0.213288	0.578537	0.252474	0.0230128	0.0269961	0.104346	0.056337	0.254581	0.624513	1	0.172869	0.526599	0.532431	0.56314	1.68161	21	5.34619	13.1148	21	3.63025	11.0586	914.823	441	2.07443
GV13	0.77	2021	2021-07	0.334934	0.138997	0.379744	0.0760482	0.0981922	0.0583032	0.0874161	0.188675	0.17205	0.663595	0.283081	0.623437	0.532261	0.437611	0.892952	23	4.33952	3.95715	15.2627	6.51085	14.3391	1227.64	529	2.32069
IF15	2.5	2022	2022-08	0.143092	0.33942	0.16519	0	0.0315791	0.0617929	0.0662677	0	0.419096	0.610184	0.621488	0.388094	0.532102	0.391852	2.89908	21	0	8.80101	12.8139	13.0512	8.14997	1204.99	441	2.73239
DS19	0.4	2021	2021-06	0.320718	0.0165917	0.254499	0.39015	0.362109	0.130841	0.130358	0.648618	0.410794	0.26167	0.415644	0.826179	0.531572	0.437488	0.463789	23	14.9182	9.44827	6.01842	9.55982	19.0021	1491.27	529	2.81904
KT15	0.43	2021	2021-11	0.162875	0.0690697	0.517532	0.092137	0.128678	0.238491	0.20209	0.340466	0.515949	0.491844	0.401937	0.669837	0.531522	0.517606	0.498566	23	7.83071	11.8668	11.3124	9.24456	15.4063	1314	529	2.48393
LR11	0.95	2021	2021-05	0.162694	0.0290701	0.384151	0.0694782	0.110035	0.090639	0.235344	0.226082	0.226363	0.889592	0.220376	0.451004	0.531514	0.455917	1.10148	23	5.19989	5.20635	20.4606	5.06864	10.3731	1499.33	529	2.83428
NF1A	0.72	2021	2021-06	0.289863	0.48368	0.181043	0.0582761	0.0606467	0.0421382	0.0544711	0.380211	0.364345	0.38459	0.268231	0.903673	0.531186	0.519567	0.834736	23	8.74485	8.37994	8.84558	6.16931	20.7845	1285.63	529	2.4303
IJ1B	0.81	2021	2021-09	0.209857	0.294653	0.140563	0.072331	0.215286	0.0242006	0.0726381	0.10135	0.0321513	0.48401	0.427709	0.749186	0.53107	0.477843	0.93905	21	2.12835	0.675178	10.1642	8.98188	15.7329	1100.29	441	2.49498
IF49	3	2021	2021-05	0.223434	0.292211	0.0989405	0.0105296	0.0379185	0.0614279	0.0643597	0.0276993	0.432454	0.356936	0.58195	0.694251	0.531045	0.533905	3.47794	21	0.581686	9.08152	7.49565	12.221	14.5793	1088.59	441	2.46847
IB31	3.97	2021	2021-04	0.180778	0.196155	0.0862222	0.054629	0.0491185	0.0370172	0.0325697	0.413869	0.42691	0.291918	0.612624	0.744914	0.530878	0.443638	4.60228	21	8.69124	8.96511	6.13028	12.8651	15.6432	1143.05	441	2.59196
GR11	1.03	2021	2021-10	0.356392	0.10502	0.331657	0.0335539	0.0496398	0.380275	0.391391	0.22143	0.596311	0.846519	0.513234	0.0856885	0.530688	0.467597	1.19398	23	5.09289	13.7152	19.4699	11.8044	1.97084	1439.09	529	2.72039
LJ13	0.5	2021	2021-06	0.354319	0.19456	0.168839	0.0151506	0.0108265	0.0763317	0.0824836	0.361669	0.320349	0.586646	0.330927	0.818166	0.530562	0.525104	0.579584	21	7.59505	6.72732	12.3196	6.94948	17.1815	1012.11	441	2.29504
IS25	0.46	2022	2022-11	0.187856	0.0497661	0.243169	0.481764	0.530747	0.173216	0.163092	0.4296	0.54202	0.625891	0.6396	0.199584	0.530458	0.456788	0.533203	23	9.8808	12.4665	14.3955	14.7108	4.59043	1449.82	529	2.74068
HS2B	0.7	2022	2022-06	0.399711	0.057274	0.343214	0.0186245	0.0463547	0.363035	0.256995	0.0101727	0.825252	0.164084	0.317086	0.933644	0.530371	0.484502	0.811378	23	0.233973	18.9808	3.77394	7.29298	21.4738	1296.78	529	2.45139
BR21	1.15	2021	2021-06	0.293458	0.047031	0.368797	0.180864	0.131895	0.177021	0.206899	0.831897	0.312651	0.724376	0.0780137	0.747027	0.530072	0.479396	1.33287	23	19.1336	7.19098	16.6606	1.79431	17.1816	1454.44	529	2.74942
IC39	2.6	2022	2022-11	0.132616	0.377672	0.111046	0.0849232	0.0804234	0.0417418	0.0439479	0.510693	0.391152	0.904703	0.376526	0.432581	0.529993	0.526481	3.01339	21	10.7246	8.21419	18.9988	7.90706	9.08419	1096.2	441	2.48571
IF1A	3.2	2022	2022-04	0.228943	0.268087	0.0877727	0.0451695	0.0504381	0.0661138	0.063177	0.353252	0.450772	0	0.691027	0.853515	0.529938	0.449691	3.70874	21	7.41828	9.46622	0	14.5116	17.9238	1201.91	441	2.72543
JS1B	0.65	2021	2021-11	0.451969	0.0152087	0.177211	0.261536	0.256324	0.161168	0.153033	0.342573	0.534692	0.146384	0.551288	0.772659	0.529811	0.403738	0.753313	23	7.87917	12.2979	3.36684	12.6796	17.7711	1422.53	529	2.68909
HC3B	2.1	2022	2022-07	0.219092	0.343074	0.13862	0.0544173	0.0561504	0.0101259	0.0136239	0.677672	0.17097	0.702503	0.125499	0.746449	0.529469	0.533606	2.43357	23	15.5865	3.93231	16.1576	2.88648	17.1683	1284.73	529	2.4286
LX15	0.25	2022	2022-03	0.176881	0.119446	0.503868	0.0417403	0.02731	0.0521669	0.0865126	0.452288	0.278337	0.864349	0.31562	0.468938	0.529425	0.505016	0.289707	22	9.95033	6.12341	19.0157	6.94365	10.3166	1150.3	484	2.37665
LR1B	0.77	2022	2022-02	0.19721	0.000387354	0.520597	0.0516108	0.111484	0.349687	0.311279	0	0.679943	0.116771	0.983189	0.0817202	0.529001	0.504571	0.892199	23	0	15.6387	2.68574	22.6133	1.87956	1340.96	529	2.53489
IG15	0.76	2022	2022-06	0.241753	0.397982	0.194346	0.0637102	0.108034	0.0141295	0.0403671	0.134167	0.116375	0.527213	0.662395	0.526725	0.528987	0.594168	0.880609	20	2.68334	2.32751	10.5443	13.2479	10.5345	794.489	400	1.98622
IF49	3	2021	2021-09	0.228714	0.285689	0.0993342	0.0441294	0.0379185	0.0755326	0.0643597	0.466303	0.577827	0.321601	0.635832	0.689678	0.528491	0.533905	3.47564	21	9.79236	12.1344	6.75362	13.3525	14.4832	1088.59	441	2.46847
GD29	0.85	2021	2021-03	0.250114	0.357739	0.135699	0.0692428	0.0570351	0.000197228	0.00235607	0.47373	0.0194486	0.675571	0.507876	0.322873	0.52848	0.521575	0.984762	23	10.8958	0.447317	15.5381	11.6812	7.42607	1093.28	529	2.0667
FR1B	0.7	2021	2021-07	0.307562	0.0544925	0.407188	0.0952207	0.0922667	0.108724	0.237881	0.280436	0.154976	0.589992	0.554037	0.375977	0.528477	0.424261	0.81098	23	6.45002	3.56446	13.5698	12.7429	8.64746	1368.03	529	2.58606
BR25	0.2	2022	2022-02	0.32068	0.00716696	0.435662	0.154606	0.173356	0.148	0.188717	0.324145	0.227327	0.179779	0.806432	0.409665	0.528316	0.520874	0.231699	23	7.45535	5.22851	4.13493	18.5479	9.42229	1199.12	529	2.26677
KT15	0.43	2021	2021-01	0.181538	0.0732616	0.480273	0.147121	0.128678	0.153946	0.20209	0.719979	0.16124	0.351648	0.365641	0.804808	0.528295	0.517606	0.49815	23	16.5595	3.70851	8.08791	8.40973	18.5106	1314	529	2.48393
LS13	0.66	2021	2021-06	0.121656	0.00765429	0.623214	0.076449	0.0910102	0.25658	0.294168	0.245798	0.260203	0.869632	0.539687	0.0401024	0.528163	0.422319	0.764576	23	5.65335	5.98468	20.0015	12.4128	0.922355	1532.27	529	2.89655
LR1B	0.77	2021	2021-03	0.146703	0.0230415	0.379068	0.0933485	0.111484	0.209874	0.311279	0.3315	0.027992	0.818515	0	0.762433	0.52812	0.504571	0.891996	23	7.6245	0.643815	18.8258	0	17.5359	1340.96	529	2.53489
BT25	0.69	2022	2022-10	0.359295	0.000559965	0.156505	0.294824	0.228634	0.135248	0.117218	0.644083	0.64779	0.906984	0	0.741842	0.52811	0.342936	0.799319	22	14.1698	14.2514	19.9537	0	16.3205	1597.56	484	3.30074
GR13	0.69	2021	2021-09	0.285814	0.134542	0.34652	0.0267883	0.0595323	0.592209	0.382276	0.0650076	1	0.802632	0.141983	0.544588	0.527803	0.465338	0.799255	23	1.49517	23	18.4605	3.2656	12.5255	1252.45	529	2.36759
GV15	0.58	2021	2021-08	0.3969	0.130573	0.379134	0.0356254	0.0925023	0.0895841	0.0731192	0.12749	0.277927	0.363807	0.544977	0.607513	0.527732	0.473692	0.671825	23	2.93227	6.39231	8.36756	12.5345	13.9728	1238.57	529	2.34134
HC3B	2.1	2021	2021-09	0.233211	0.353137	0.122051	0.0628525	0.0561504	0.00469297	0.0136239	0.782717	0.0792382	0.56316	0.0998495	0.881904	0.527645	0.533606	2.43242	23	18.0025	1.82248	12.9527	2.29654	20.2838	1284.73	529	2.4286
BR15	0.84	2021	2021-10	0.232611	0	0.0868471	0.656741	0.476389	0.0672925	0.0802557	0.917193	0.379311	0.799083	#NUM!	0.902636	0.527555	0.58507	0.972944	12	11.0063	4.55174	9.58899	#NUM!	10.8316	358.048	144	2.48644
KT15	0.43	2021	2021-12	0.223767	0.0630441	0.451338	0.15821	0.128678	0.27708	0.20209	0.796514	0.67785	0.0344214	0.454112	0.909622	0.527498	0.517606	0.498047	23	18.3198	15.5906	0.791693	10.4446	20.9213	1314	529	2.48393
LJ15	0.37	2022	2022-01	0.215596	0.412302	0.1049	0.0170442	0.0190406	0.0513314	0.0581608	0.308701	0.30709	0.696199	0.057284	1	0.527393	0.54525	0.428541	21	6.48273	6.44888	14.6202	1.20296	21	998.851	441	2.26497
IT2B	0.8	2021	2021-09	0.245211	0.0058993	0.330198	0.389015	0.462315	0.131393	0.145523	0.44782	0.279018	0.0266684	0.708967	0.671217	0.527329	0.436286	0.926559	23	10.2999	6.41742	0.613373	16.3062	15.438	1529.1	529	2.89054
FV29	0.33	2022	2022-09	0.319532	0	0.658766	0	0.0944113	0.0100147	0.217947	0	0	0.169537	1	0	0.527081	0.454141	0.382181	23	0	0	3.89935	23	0	1570.81	529	2.9694
LS13	0.66	2022	2022-06	0.151254	0.00818671	0.585284	0.0861454	0.0910102	0.287267	0.294168	0.334105	0.503238	0.567174	0.507668	0.477349	0.526779	0.422319	0.764302	23	7.68442	11.5745	13.045	11.6764	10.979	1532.27	529	2.89655
ES23	0.59	2022	2022-02	0.372937	0.0088214	0.451452	0.0246835	0.0840708	0.188915	0.204605	0.156593	0.334163	0.0952229	0.73592	0.578458	0.526771	0.400598	0.683238	23	3.60165	7.68576	2.19013	16.9262	13.3045	1556.54	529	2.94243
HS2B	0.7	2022	2022-04	0.431945	0.0397407	0.348405	0.0408158	0.0463547	0.15324	0.256995	0.287139	0.146534	0	0.529138	0.898959	0.526696	0.484502	0.810606	23	6.6042	3.37028	0	12.1702	20.676	1296.78	529	2.45139
IC39	2.6	2021	2021-11	0.240078	0.344496	0.0832032	0.0619008	0.0804234	0.0441648	0.0439479	0.237664	0.43003	0.00274058	0.570116	1	0.526652	0.526481	3.01079	21	4.99093	9.03064	0.0575521	11.9724	21	1096.2	441	2.48571
IF5B	0.86	2021	2021-10	0.24908	0.443157	0.18563	0.0282918	0.0275106	0.0145119	0.0374287	0.337024	0.0604105	0.485394	0.788724	0.301704	0.526413	0.517695	0.995815	21	7.07751	1.26862	10.1933	16.5632	6.33578	1052.2	441	2.38594
HC3B	2.1	2021	2021-08	0.237572	0.349375	0.116507	0.0590759	0.0561504	0.0057728	0.0136239	0.735686	0.0974706	0.520124	0.109438	0.927233	0.526334	0.533606	2.43159	23	16.9208	2.24182	11.9628	2.51707	21.3264	1284.73	529	2.4286
GV15	0.58	2021	2021-01	0.364686	0.0443259	0.539307	0.0641153	0.0925023	0.00303301	0.0731192	0.267264	0	0.476664	0.845532	0	0.526177	0.473692	0.671555	23	6.14708	0	10.9633	19.4472	0	1238.57	529	2.34134
GE15	1	2021	2021-02	0.218672	0.42141	0.179422	0.0725603	0.0377298	0	0.00544909	1	0	0.472058	0.848836	0	0.525668	0.529763	1.1577	22	22	0	10.3853	18.6744	0	1079.83	484	2.23106
BZ11	1.46	2021	2021-07	0.300319	0.00357257	0.278382	0.323471	0.517339	0.208217	0.156069	0.158271	0.919601	0	0.922718	0.295887	0.52558	0.400378	1.6902	23	3.64023	21.1508	0	21.2225	6.8054	1526.56	529	2.88575
BV39	0.31	2022	2022-06	0.345566	0	0.470331	0.113772	0.262158	0.169194	0.159376	0	0.398926	0	1	0.218689	0.525485	0.458346	0.35887	23	0	9.17529	0	23	5.02985	1196.68	529	2.26216
MS15	0.35	2021	2021-07	0.28912	0.16468	0.257962	0.0729296	0.0708821	0.418681	0.297474	0.424009	0.503284	0.665852	0.115636	0.836426	0.525311	0.432348	0.405158	23	9.75221	11.5755	15.3146	2.65964	19.2378	1330.16	529	2.51447
FW2B	0.65	2021	2021-05	0.333708	0.225025	0.163639	0.0210871	0.100316	0.0309524	0.136854	0.0261839	0.0426091	0.318616	0.24797	0.951814	0.52531	0.410567	0.752435	23	0.602231	0.980009	7.32818	5.70331	21.8917	1245.8	529	2.35502
NZ19	0.21	2021	2021-05	0.317924	0.102937	0.39116	0.0891636	0.0720471	0.0874684	0.143466	0.539713	0.224114	0.507799	0.434244	0.627273	0.525267	0.421082	0.243092	23	12.4134	5.15462	11.6794	9.9876	14.4273	1439.27	529	2.72075
NF15	0.7	2022	2022-02	0.275115	0.391294	0.263506	0.0476894	0.0769177	0.0767054	0.0600122	0.0252548	0.656562	0.540381	0.591206	0.345566	0.525073	0.511415	0.810265	23	0.580861	15.1009	12.4288	13.5977	7.94803	1334.73	529	2.52312
IJ1B	0.81	2021	2021-05	0.203951	0.393938	0.0980966	0.0254687	0.215286	0.018153	0.0726381	0.00723779	0	0.52133	0.194649	0.977849	0.524914	0.477843	0.937554	21	0.151994	0	10.9479	4.08763	20.5348	1100.29	441	2.49498
JS1B	0.65	2022	2022-11	0.30633	0.033894	0.212399	0.308196	0.256324	0.27876	0.153033	0.533223	1	0.932099	0	0.598717	0.524907	0.403738	0.752357	23	12.2641	23	21.4383	0	13.7705	1422.53	529	2.68909
BR25	0.2	2021	2021-04	0.171986	0.0370256	0.383362	0.258614	0.173356	0.241688	0.188717	0.74193	0.5411	1	0	0.579894	0.524859	0.520874	0.231492	23	17.0644	12.4453	23	0	13.3376	1199.12	529	2.26677
GD29	0.85	2022	2022-02	0.299528	0.340029	0.121077	0.0340425	0.0570351	0	0.00235607	0.0955135	0	0.312458	0.638314	0.503663	0.524729	0.521575	0.983806	23	2.19681	0	7.18653	14.6812	11.5843	1093.28	529	2.0667
DE29	1.25	2022	2022-10	0.222856	0.945401	0.134155	0.000252591	0.00888239	0.042253	0.0523303	0.0079943	0.119549	0.734293	0	1	0.524437	0.500179	1.44666	21	0.16788	2.51052	15.4201	0	21	938.608	441	2.12836
IB33	3.5	2022	2022-09	0.0759987	0.329686	0.0916193	0.0491844	0.0632326	0.0310154	0.0367732	0.380523	0.246468	0.929571	0.205826	0.637849	0.524056	0.46012	4.05026	21	7.99099	5.17583	19.521	4.32234	13.3948	1189.67	441	2.69767
NS1B	0.21	2022	2022-10	0.303928	0.0967134	0.354613	0.0894737	0.110743	0.114597	0.10341	0.279048	0.533017	0.611485	0.501938	0.521965	0.523997	0.425612	0.243012	22	6.13905	11.7264	13.4527	11.0426	11.4832	1348.74	484	2.78665
HC3B	2.1	2022	2022-01	0.236672	0.345284	0.117668	0.0695609	0.0561504	0.0179588	0.0136239	0.866259	0.303224	0.529012	0.119866	0.917734	0.523889	0.533606	2.43005	23	19.924	6.97415	12.1673	2.75691	21.1079	1284.73	529	2.4286
GV15	0.58	2021	2021-09	0.476791	0.0890392	0.371968	0.0283002	0.0925023	0.0255537	0.0731192	0.0915517	0.072317	0.0839207	0.689715	0.634692	0.5238	0.473692	0.671141	23	2.10569	1.66329	1.93018	15.8634	14.5979	1238.57	529	2.34134
HC3B	2.1	2022	2022-10	0.2274	0.348705	0.124508	0.0571668	0.0561504	0.00687042	0.0136239	0.711912	0.116003	0.620514	0.111147	0.86182	0.523648	0.533606	2.4299	23	16.374	2.66807	14.2718	2.55638	19.8219	1284.73	529	2.4286
CS15	0.53	2022	2022-11	0.286022	0.064135	0.359038	0.221017	0.3358	0.24833	0.225466	0.212317	0.447956	0.865761	0.64307	0	0.523607	0.402117	0.613254	22	4.67097	9.85502	19.0468	14.1475	0	1429.55	484	2.95363
IZ29	0.4	2021	2021-10	0.229707	0.0213076	0.198956	0.551274	0.613022	0.108009	0.104398	0.0883232	0.459251	0.127778	0.625253	0.70204	0.523507	0.4865	0.462821	23	2.03143	10.5628	2.93889	14.3808	16.1469	1245.17	529	2.35381
ER11	1.09	2021	2021-04	0.501189	0.0239464	0.255178	0.0266181	0.0529159	0.381977	0.437149	0.0522132	0.598293	0.107079	0.760264	0.524076	0.522854	0.459877	1.26097	23	1.2009	13.7607	2.46282	17.4861	12.0538	1462.4	529	2.76446
FW2B	0.65	2021	2021-01	0.267462	0.247718	0.17558	0.0751219	0.100316	0.049181	0.136854	0.123562	0.0883207	0.47681	0.172129	0.93466	0.52282	0.410567	0.75195	23	2.84192	2.03138	10.9666	3.95897	21.4972	1245.8	529	2.35502
IU19	0.3	2022	2022-03	0.173383	0.0401241	0.238043	0.549745	0.451108	0.12571	0.145262	1	0.299093	0.754551	0.0429699	0.772276	0.522585	0.538226	0.347033	23	23	6.87915	17.3547	0.988308	17.7623	1389.42	529	2.62649
BR15	0.84	2021	2021-06	0.264364	0	0.0790601	0.620796	0.476389	0.0045329	0.0802557	0.864657	0.0255509	0.748274	#NUM!	0.92583	0.522432	0.58507	0.971653	12	10.3759	0.306611	8.97929	#NUM!	11.11	358.048	144	2.48644
GW1A	0.5	2021	2021-12	0.290457	0.16268	0.429434	0.106703	0.103302	0.182323	0.112428	0.416077	0.987127	0.416039	0.42511	0.663159	0.522056	0.595493	0.578308	23	9.56978	22.7039	9.56889	9.77753	15.2527	1112.54	529	2.10311
CS1A	0.65	2022	2022-01	0.219451	0.0683516	0.201351	0.430293	0.356348	0.266014	0.235995	0.648074	0.376433	0.844456	0.171493	0.607738	0.521733	0.470383	0.751738	23	14.9057	8.65796	19.4225	3.94433	13.978	1297.54	529	2.45282
GZ19	0.54	2022	2022-03	0.246596	0.287371	0.307034	0.139851	0.10713	0.107715	0.0936129	1	0.621062	0.597265	0	0.956322	0.52167	0.505005	0.624511	23	23	14.2844	13.7371	0	21.9954	1288.44	529	2.43561
HC3B	2.1	2021	2021-05	0.219473	0.366517	0.133554	0.0577189	0.0561504	0.0592261	0.0136239	0.718787	1	0.698751	0.065744	0.787867	0.521593	0.533606	2.4286	23	16.5321	23	16.0713	1.51211	18.1209	1284.73	529	2.4286
IB33	3.5	2021	2021-03	0.246811	0.22939	0.0868452	0.0778666	0.0632326	0.0292417	0.0367732	0.754056	0.222024	0	0.799791	0.726167	0.521115	0.46012	4.04717	21	15.8352	4.66251	0	16.7956	15.2495	1189.67	441	2.69767
GF29	1.03	2022	2022-07	0.275389	0.191369	0.300739	0.148454	0.170692	0.0795561	0.0736156	0.405514	0.564828	0.285429	0.962852	0.0641578	0.520917	0.502525	1.19096	23	9.32682	12.991	6.56486	22.1456	1.47563	1405.73	529	2.65733
FV29	0.33	2021	2021-06	0.270744	0.0551299	0.445989	0.118374	0.0944113	0.191232	0.217947	0.743278	0.521045	0.492573	0.332306	0.756217	0.520404	0.454141	0.38152	23	17.0954	11.984	11.3292	7.64305	17.393	1570.81	529	2.9694
IU29	0.3	2021	2021-10	0.218461	0.00975856	0.178514	0.611204	0.558916	0.112537	0.12377	0.896256	0.278618	0.165474	0.448375	0.868572	0.520393	0.475164	0.346835	23	20.6139	6.40822	3.80591	10.3126	19.9771	1578.81	529	2.98452
GV15	0.58	2021	2021-12	0.368265	0.139213	0.389216	0.0604409	0.0925023	0.0321577	0.0731192	0.249238	0.0935232	0.464128	0.514869	0.569273	0.520382	0.473692	0.670547	23	5.73246	2.15103	10.6749	11.842	13.0933	1238.57	529	2.34134
ER1B	0.61	2021	2021-08	0.454536	0.0237709	0.234688	0.0609936	0.0506164	0.553293	0.577781	0.531161	0.479814	0	0.534207	0.927102	0.520151	0.460659	0.705188	23	12.2167	11.0357	0	12.2868	21.3234	1399.02	529	2.64464
GE15	1	2022	2022-06	0.241127	0.484338	0.105401	0.0381418	0.0377298	0.00756699	0.00544909	0.445832	0.342451	0.376715	0.550475	0.694733	0.519965	0.529763	1.15599	22	9.80831	7.53392	8.28772	12.1104	15.2841	1079.83	484	2.23106
XJ1B	0.43	2022	2022-04	0.345048	0.291431	0.150344	0.0144201	0.0155488	0.092669	0.0794125	0.23591	0.379443	0.243523	0.559978	0.955645	0.519904	0.536699	0.497068	20	4.71819	7.58885	4.87047	11.1996	19.1129	881.264	400	2.20316
IZ29	0.4	2021	2021-11	0.24514	0.0200212	0.187807	0.54831	0.613022	0.0928592	0.104398	0.0801898	0.322747	0	0.647877	0.783075	0.519563	0.4865	0.462348	23	1.84437	7.42319	0	14.9012	18.0107	1245.17	529	2.35381
DT15	0.26	2021	2021-02	0.302465	0.00511881	0.444836	0.110556	0.085922	0.156568	0.196005	0.614981	0.389311	0	0.666861	0.764382	0.519548	0.369327	0.300525	23	14.1446	8.95416	0	15.3378	17.5808	1575.67	529	2.97858
JZ19	0.43	2021	2021-10	0.463926	0.0476131	0.263381	0.145843	0.138434	0.21256	0.163356	0.457872	0.622574	0.312594	0.487597	0.743286	0.519453	0.451097	0.497009	23	10.531	14.3192	7.18965	11.2147	17.0956	1349.17	529	2.55041
BJ1B	1.09	2021	2021-04	0.460544	0.321795	0.0549341	0.243121	0.284251	0.0112422	0.100056	0.547481	0.0651289	0	0.741705	1	0.519378	0.48682	1.25984	19	10.4021	1.23745	0	14.0924	19	1142.01	361	3.16345
IB33	3.5	2021	2021-12	0.123042	0.286237	0.0934899	0.068134	0.0632326	0.03052	0.0367732	0.627307	0.239641	0.673561	0.463137	0.603246	0.519332	0.46012	4.0453	21	13.1734	5.03247	14.1448	9.72587	12.6682	1189.67	441	2.69767
BU23	0.78	2022	2022-01	0.26579	0	0.391564	0.301129	0.428322	0.152258	0.191235	0.283084	0.471253	0.214466	1	0.0866296	0.519155	0.438033	0.901482	23	6.51094	10.8388	4.93272	23	1.99248	1488.08	529	2.813
LR11	0.95	2022	2022-10	0.236361	0.0084837	0.439016	0.130156	0.110035	0.332313	0.235344	0.60937	0.829922	0.311646	0.772477	0.319273	0.51886	0.455917	1.09787	23	14.0155	19.0882	7.16786	17.767	7.34327	1499.33	529	2.83428
GV13	0.77	2022	2022-10	0.36656	0.115727	0.38081	0.0608685	0.0981922	0.122402	0.0874161	0.143527	0.444526	0.570657	0.403103	0.620711	0.518773	0.437611	0.889837	23	3.30111	10.2241	13.1251	9.27136	14.2763	1227.64	529	2.32069
GF29	1.03	2022	2022-09	0.282039	0.188303	0.299129	0.144976	0.170692	0.0897434	0.0736156	0.378722	0.862545	0.234003	0.972415	0.071851	0.518644	0.502525	1.19026	23	8.7106	19.8385	5.38208	22.3656	1.65257	1405.73	529	2.65733
LJ13	0.5	2022	2022-08	0.332681	0.217636	0.141655	0.0117398	0.0108265	0.0268107	0.0824836	0.280247	0	0.663573	0.142833	0.978967	0.518223	0.525104	0.577734	21	5.8852	0	13.935	2.99948	20.5583	1012.11	441	2.29504
KD19	2.42	2022	2022-09	0.159567	0.550486	0.21843	0.0389531	0.0503618	0.0373591	0.0174265	0.395992	0.814686	0.786212	0.376691	0.588081	0.518109	0.572877	2.79615	21	8.31582	17.1084	16.5105	7.9105	12.3497	1034.8	441	2.34649
KD19	2.42	2022	2022-04	0.243854	0.484308	0.221802	0.0620058	0.0503618	0.0451105	0.0174265	0.784578	1	0.0997975	0.852549	0.535863	0.517959	0.572877	2.79604	21	16.4761	21	2.09575	17.9035	11.2531	1034.8	441	2.34649
BU23	0.78	2021	2021-07	0.282273	0	0.356241	0.289904	0.428322	0.204658	0.191235	0.26615	0.633436	0.127503	1	0.169024	0.51768	0.438033	0.901137	23	6.12145	14.569	2.93256	23	3.88755	1488.08	529	2.813
HS2B	0.7	2022	2022-08	0.376404	0.0293987	0.398206	0.0469867	0.0463547	0.259456	0.256995	0.364157	0.490159	0.282725	0.654216	0.566182	0.517615	0.484502	0.808699	23	8.37562	11.2736	6.50266	15.047	13.0222	1296.78	529	2.45139
LS15	0.5	2022	2022-04	0.146407	0.000352633	0.683042	0.0682995	0.0946858	0.160423	0.281443	0.213361	0	0.644279	0.737853	0.0415367	0.517607	0.395937	0.577641	23	4.90729	0	14.8184	16.9706	0.955345	1459.92	529	2.75978
JS29	0.65	2022	2022-05	0.496554	0.00960388	0.160347	0.361943	0.366384	0.118496	0.173379	0.663637	0.0271563	0.327615	0.443575	0.773058	0.517369	0.403045	0.750887	23	15.2637	0.624594	7.53513	10.2022	17.7803	1616.09	529	3.05499
KD19	2.42	2021	2021-11	0.20485	0.53498	0.206128	0.0747856	0.0503618	0.0195024	0.0174265	1	0.387785	0.417436	0.48819	0.778549	0.517302	0.572877	2.79556	21	21	8.14347	8.76616	10.252	16.3495	1034.8	441	2.34649
CB19	1.06	2021	2021-09	0.549989	0.245449	0.164884	0.10124	0.0885956	0.135432	0.132923	0.394737	0.484469	0.614432	0.488318	0.644101	0.517295	0.582083	1.2245	21	8.28948	10.1739	12.9031	10.2547	13.5261	962.807	441	2.18324
IU29	0.3	2022	2022-06	0.189046	0.0110341	0.204107	0.585821	0.558916	0.180618	0.12377	0.859035	1	0.444292	0.376271	0.687882	0.517272	0.475164	0.346554	23	19.7578	23	10.2187	8.65424	15.8213	1578.81	529	2.98452
GF19	1.07	2022	2022-11	0.1939	0.41241	0.132509	0.19065	0.238903	0.155105	0.130518	0.163444	0.86478	0.682159	0.244998	0.675695	0.517249	0.515295	1.23604	23	3.75921	19.8899	15.6897	5.63494	15.541	1390.14	529	2.62786
LX15	0.25	2022	2022-01	0.235662	0.138807	0.326591	0.027979	0.02731	0.110098	0.0865126	0.303174	0.635564	0.662663	0.204693	0.850619	0.517188	0.505016	0.288789	22	6.66982	13.9824	14.5786	4.50325	18.7136	1150.3	484	2.37665
GZ19	0.54	2021	2021-12	0.264312	0.258677	0.300377	0.120607	0.10713	0.0952073	0.0936129	0.717286	0.403875	0.33737	0.2556	0.994533	0.517177	0.505005	0.623783	23	16.4976	9.28912	7.75951	5.87879	22.8743	1288.44	529	2.43561
IU19	0.3	2021	2021-08	0.24789	0.0324109	0.203719	0.518833	0.451108	0.102427	0.145262	0.899791	0.0449134	0.267035	0.270436	1	0.516924	0.538226	0.346523	23	20.6952	1.03301	6.14179	6.22002	23	1389.42	529	2.62649
XJ1B	0.43	2021	2021-12	0.225413	0.354433	0.234522	0.0315465	0.0155488	0.0847949	0.0794125	0.586043	0.337717	1	0.388727	0.467367	0.516847	0.536699	0.496673	20	11.7209	6.75435	20	7.77454	9.34735	881.264	400	2.20316
IB33	3.5	2022	2022-08	0.110691	0.2816	0.0985634	0.0691594	0.0632326	0.0415041	0.0367732	0.640661	0.391017	0.740772	0.490596	0.50939	0.516728	0.46012	4.04256	21	13.4539	8.21136	15.5562	10.3025	10.6972	1189.67	441	2.69767
BR11	1.8	2021	2021-11	0.273158	0.00297758	0.135383	0.504404	0.663087	0.0878914	0.0721959	0.092527	0.495743	0.0757847	0.701073	0.666579	0.516682	0.36143	2.07901	23	2.12812	11.4021	1.74305	16.1247	15.3313	1534.13	529	2.90006
GZ19	0.54	2022	2022-02	0.2638	0.213607	0.391392	0.129187	0.10713	0.0831244	0.0936129	0.843335	0.194055	0.344879	0.657091	0.472062	0.51665	0.505005	0.623697	23	19.3967	4.46327	7.93223	15.1131	10.8574	1288.44	529	2.43561
GR13	0.69	2021	2021-04	0.318314	0.115702	0.317518	0.0444142	0.0595323	0.432308	0.382276	0.165741	0.567103	0.703216	0.280232	0.647551	0.516564	0.465338	0.796929	23	3.81204	13.0434	16.174	6.44535	14.8937	1252.45	529	2.36759
DS19	0.4	2022	2022-06	0.201545	0.0283932	0.306504	0.498536	0.362109	0.0800408	0.130358	0.892406	0	0.971226	0	0.661098	0.516203	0.437488	0.461944	23	20.5253	0	22.3382	0	15.2053	1491.27	529	2.81904
BR11	1.8	2022	2022-09	0.09035	0.00996091	0.064995	0.790356	0.663087	0.0553751	0.0721959	0.683364	0.312338	0.778363	0	0.896562	0.516202	0.36143	2.07875	23	15.7174	7.18377	17.9024	0	20.6209	1534.13	529	2.90006
IZ29	0.4	2022	2022-11	0.146068	0.0209166	0.295548	0.551999	0.613022	0.0570386	0.104398	0.090312	0	0.820224	0.632131	0	0.516192	0.4865	0.461943	23	2.07718	0	18.8651	14.539	0	1245.17	529	2.35381
BR25	0.2	2022	2022-06	0.349301	0.000123785	0.473607	0.114929	0.173356	0.149857	0.188717	0.164768	0.233548	0.0219005	0.996657	0.286157	0.515949	0.520874	0.230957	23	3.78966	5.3716	0.503713	22.9231	6.58161	1199.12	529	2.26677
LJ13	0.5	2022	2022-04	0.282402	0.212646	0.174521	0.00901207	0.0108265	0.0390337	0.0824836	0.215133	0.0790699	0.842322	0.183508	0.784554	0.515944	0.525104	0.577392	21	4.51779	1.66047	17.6888	3.85367	16.4756	1012.11	441	2.29504
LK1B	1.67	2022	2022-06	0.276355	0.180342	0.177096	0.0349241	0.0234044	0.0583466	0.0478906	0.950719	0.399321	0.273804	0.649099	0.712189	0.515592	0.427126	1.92831	21	19.9651	8.38574	5.74988	13.6311	14.956	1226.05	441	2.78015
HZ15	0.4	2022	2022-09	0.322187	0.03907	0.398002	0.0965426	0.31448	0.143705	0.149092	0.127689	0.369714	0.0977522	0.818674	0.493317	0.515578	0.413803	0.461869	23	2.93686	8.50341	2.2483	18.8295	11.3463	1530.33	529	2.89287
GZ19	0.54	2022	2022-01	0.248671	0.257658	0.339947	0.134825	0.10713	0.103484	0.0936129	0.926161	0.547601	0.566837	0.264683	0.767385	0.515496	0.505005	0.62351	23	21.3017	12.5948	13.0372	6.08771	17.6498	1288.44	529	2.43561
LR1B	0.77	2022	2022-01	0.205614	0	0.489292	0.0569697	0.111484	0.418324	0.311279	0.0425627	1	0	1	0.232286	0.515469	0.504571	0.889073	23	0.978942	23	0	23	5.34258	1340.96	529	2.53489
GZ19	0.54	2022	2022-08	0.219145	0.2671	0.409356	0.136912	0.10713	0.128792	0.0936129	0.956822	0.987063	1	0.180572	0.368942	0.51545	0.505005	0.623503	23	22.0069	22.7024	23	4.15315	8.48566	1288.44	529	2.43561
LJ15	0.37	2022	2022-06	0.2563	0.309269	0.155868	0.0367652	0.0190406	0.0341806	0.0581608	0.665883	0.204485	0.566616	0.378765	0.820228	0.515399	0.54525	0.427209	21	13.9835	4.29418	11.8989	7.95406	17.2248	998.851	441	2.26497
LS15	0.5	2021	2021-05	0.0983889	0.00132542	0.540148	0.230324	0.0946858	0.214225	0.281443	1	0.202888	0.898933	0.0146843	0.726751	0.515384	0.395937	0.577308	23	23	4.66641	20.6755	0.337739	16.7153	1459.92	529	2.75978
HC3B	2.1	2021	2021-10	0.226259	0.353043	0.120789	0.0758595	0.0561504	0.00587706	0.0136239	0.944697	0.0992309	0.631773	0.100089	0.892226	0.515251	0.533606	2.42461	23	21.728	2.28231	14.5308	2.30205	20.5212	1284.73	529	2.4286
BR25	0.2	2021	2021-05	0.261829	0.0269856	0.305751	0.284365	0.173356	0.212466	0.188717	0.845371	0.443234	0.504413	0.271163	0.832507	0.515191	0.520874	0.230911	23	19.4435	10.1944	11.6015	6.23675	19.1477	1199.12	529	2.26677
BJ1B	1.09	2022	2022-05	0.17467	0.371633	0.210091	0.288034	0.284251	0.170009	0.100056	0.64862	0.984903	0.825106	0.647702	0.382859	0.514993	0.48682	1.2584	19	12.3238	18.7132	15.677	12.3063	7.27433	1142.01	361	3.16345
HS21	1.58	2022	2022-06	0.484165	0.00112037	0.330679	0.0207347	0.0350051	0.248887	0.225783	0.222508	0.585746	0	0.983772	0.329882	0.514949	0.502306	1.82409	23	5.11769	13.4722	0	22.6268	7.58729	1292.2	529	2.44273
ET1B	0.69	2021	2021-10	0.0306859	0	0.057703	0.988171	0.145489	0.131279	0.182972	1	0.263392	1	1	1	0.514812	0.657358	0.796566	12	12	3.1607	12	12	12	272.691	144	1.89369
HR1B	0.5	2021	2021-04	0.2377	0.231845	0.298549	0.0799504	0.0455764	0.329643	0.423109	0.974071	0.150929	1	0	0.648061	0.514656	0.38907	0.577198	23	22.4036	3.47136	23	0	14.9054	1577.26	529	2.98159
GR13	0.69	2022	2022-10	0.276603	0.114792	0.358747	0.0257129	0.0595323	0.23942	0.382276	0.0588615	0.0448998	0.830807	0.286914	0.50118	0.514642	0.465338	0.796531	23	1.35382	1.03269	19.1086	6.59903	11.5271	1252.45	529	2.36759
BJ1B	1.09	2022	2022-02	0.200455	0.272604	0.249203	0.20765	0.284251	0.0938808	0.100056	0.467603	0.543875	0.750683	0.834486	0.227288	0.514511	0.48682	1.25825	19	8.88446	10.3336	14.263	15.8552	4.31848	1142.01	361	3.16345
LF19	1.65	2021	2021-04	0.177367	0.362924	0.260777	0.0178287	0.0652014	0.0762124	0.0706643	0	0.354751	0.474271	0.573728	0.65237	0.51413	0.507166	1.90449	21	0	7.44977	9.95969	12.0483	13.6998	1159.26	441	2.62871
BX29	0.71	2021	2021-08	0.299171	0.00168788	0.243924	0.457242	0.564496	0.148252	0.156285	0.110114	0.368392	0.186578	0.898264	0.298451	0.514051	0.469312	0.819493	23	2.53261	8.47302	4.29129	20.6601	6.86438	1355.74	529	2.56283
BR25	0.2	2022	2022-09	0.299253	0	0.561524	0.0739134	0.173356	0.0970106	0.188717	1.24858e-05	0.0565571	0.297975	1	0	0.513762	0.520874	0.230826	23	0.000287174	1.30081	6.85343	23	0	1199.12	529	2.26677
GF29	1.03	2022	2022-08	0.277299	0.190248	0.301664	0.134465	0.170692	0.0944468	0.0736156	0.297738	1	0.27066	0.96635	0.0597327	0.51376	0.502525	1.18875	23	6.84798	23	6.22517	22.2261	1.37385	1405.73	529	2.65733
DE29	1.25	2022	2022-03	0.268666	0.440117	0.214974	0	0.00888239	0.191559	0.0523303	0	1	0.460422	0.958272	0.055648	0.513576	0.500179	1.44259	21	0	21	9.66885	20.1237	1.16861	938.608	441	2.12836
MZ1A	0.61	2021	2021-05	0.363293	0.166787	0.364005	0.0422237	0.0400342	0.186286	0.168146	0.375312	0.407209	0.490692	0.389662	0.735928	0.513254	0.392102	0.703925	23	8.63217	9.36581	11.2859	8.96222	16.9263	1405.65	529	2.65718
NF15	0.7	2021	2021-02	0.256409	0.601512	0.171669	0.0803599	0.0769177	0.0281103	0.0600122	0.567766	0	0.68407	0	1	0.513216	0.511415	0.807775	23	13.0586	0	15.7336	0	23	1334.73	529	2.52312
GF29	1.03	2021	2021-03	0.200527	0.488674	0.146254	0.160574	0.170692	0.0795301	0.0736156	0.498894	0.564069	0.864318	0.0355889	0.8027	0.513154	0.502525	1.18856	23	11.4746	12.9736	19.8793	0.818544	18.4621	1405.73	529	2.65733
GE15	1	2021	2021-03	0.223669	0.468243	0.12444	0.0520282	0.0377298	0.000772266	0.00544909	0.669417	0.0349496	0.45084	0.626784	0.516038	0.513022	0.529763	1.15391	22	14.7272	0.768891	9.91848	13.7893	11.3528	1079.83	484	2.23106
JS29	0.65	2021	2021-04	0.330382	0.00990837	0.235825	0.443502	0.366384	0.122692	0.173379	0.938683	0.0536338	0.838045	0.425934	0.29333	0.512407	0.403045	0.749919	23	21.5897	1.23358	19.275	9.79649	6.74659	1616.09	529	3.05499
JJ15	0.49	2022	2022-02	0.276953	0.319033	0.309511	0.103216	0.0702909	0	0.024715	0.662439	0	0.0410656	0.966387	0.403143	0.512279	0.519894	0.565305	22	14.5737	0	0.903444	21.2605	8.86914	1123.01	484	2.32026
GW1A	0.5	2022	2022-04	0.257332	0.144719	0.472073	0.144376	0.103302	0.159497	0.112428	0.73007	0.805019	0.630635	0.517392	0.397621	0.512128	0.595493	0.576819	23	16.7916	18.5154	14.5046	11.9	9.14529	1112.54	529	2.10311
IU19	0.3	2021	2021-10	0.288701	0.0179561	0.24112	0.459684	0.451108	0.139958	0.145262	0.708049	0.454647	0	0.696713	0.751865	0.511851	0.538226	0.346067	23	16.2851	10.4569	0	16.0244	17.2929	1389.42	529	2.62649
HS3B	0.4	2022	2022-07	0.379607	0.0301115	0.391495	0.0253766	0.0662496	0.321113	0.227283	0.0855348	0.758309	0.266149	0.52178	0.746457	0.511622	0.464468	0.461395	23	1.9673	17.4411	6.12143	12.0009	17.1685	1347.02	529	2.54634
GE1A	1.33	2021	2021-10	0.36032	0.402833	0.116934	0.0178477	0.0397917	0.0242025	0.0174681	0.0605673	0.287814	0	0.630114	0.916974	0.511559	0.541633	1.53411	22	1.33248	6.33191	0	13.8625	20.1734	995.135	484	2.05606
IU29	0.3	2021	2021-12	0.16016	0.0150874	0.188813	0.64767	0.558916	0.117789	0.12377	0.949729	0.334263	0.718111	0.147153	0.795862	0.511498	0.475164	0.346035	23	21.8438	7.68806	16.5166	3.38451	18.3048	1578.81	529	2.98452
XS13	0.37	2021	2021-12	0	0	0.220622	0.939183	0.234235	0	0.140866	1	0	1	1	1	0.511373	0.66988	0.426762	12	12	0	12	12	12	357.63	144	2.48354
LS11	0.83	2021	2021-12	0.206154	0	0.550436	0.0790467	0.099655	0.232893	0.289866	0.390351	0.293839	0.292409	1	0.142103	0.511359	0.457921	0.957328	22	8.58771	6.46445	6.433	22	3.12626	1328.67	484	2.7452
HZ13	0.62	2022	2022-07	0.198202	0.0414251	0.516669	0.182325	0.224733	0.138133	0.156183	0.404642	0.382875	0.68374	0.522921	0.375041	0.510967	0.4508	0.71504	23	9.30676	8.80612	15.726	12.0272	8.62594	1494.59	529	2.82532
LX13	0.4	2022	2022-06	0.283039	0.126152	0.329756	0.0146532	0.0130724	0.0848432	0.106496	0.26522	0.120615	0.71697	0	1	0.51089	0.44718	0.461307	23	6.10006	2.77415	16.4903	0	23	1192.21	529	2.2537
NF15	0.7	2022	2022-09	0.227094	0.444644	0.280525	0.0461685	0.0769177	0.0781865	0.0600122	0	0.676573	0.909254	0.441168	0.224295	0.510847	0.511415	0.807278	23	0	15.5612	20.9128	10.1469	5.15878	1334.73	529	2.52312
ER1B	0.61	2021	2021-06	0.417286	0.01912	0.285928	0.0588449	0.0506164	0.553793	0.577781	0.505025	0.480947	0.145897	0.625341	0.738691	0.510639	0.460659	0.703447	23	11.6156	11.0618	3.35563	14.3828	16.9899	1399.02	529	2.64464
BU23	0.78	2022	2022-09	0.278914	0	0.358253	0.232093	0.428322	0.300969	0.191235	0.178938	0.931529	0.145226	1	0.164331	0.510624	0.438033	0.899486	23	4.11558	21.4252	3.3402	23	3.77961	1488.08	529	2.813
FW2B	0.65	2021	2021-09	0.312081	0.19645	0.203248	0.0758715	0.100316	0.0326223	0.136854	0.124913	0.0467966	0.370262	0.343466	0.89491	0.510473	0.410567	0.749542	23	2.873	1.07632	8.51602	7.89973	20.5829	1245.8	529	2.35502
BR11	1.8	2021	2021-08	0.191101	0.00520376	0.132241	0.521622	0.663087	0.177292	0.0721959	0.128104	1	0.39115	0.477582	0.676847	0.510421	0.36143	2.07563	23	2.9464	23	8.99646	10.9844	15.5675	1534.13	529	2.90006
GE15	1	2021	2021-10	0.235076	0.467272	0.117653	0.037546	0.0377298	0.0120363	0.00544909	0.43624	0.544715	0.402408	0.631391	0.579745	0.51041	0.529763	1.15312	22	9.59728	11.9837	8.85297	13.8906	12.7544	1079.83	484	2.23106
BZ15	0.3	2022	2022-01	0.113214	0.0214626	0.0768302	0.676278	0.49317	0.272026	0.173539	0.838531	0.795378	0.776518	0	1	0.510404	0.40852	0.345936	22	18.4477	17.4983	17.0834	0	22	1397.01	484	2.88638
HS11	2.15	2021	2021-04	0.451285	0.069276	0.252661	0.031782	0.0314472	0.142084	0.209893	0.381645	0.119792	0.744636	0.199425	0.740815	0.510117	0.342003	2.47903	23	8.77783	2.75521	17.1266	4.58677	17.0388	1491.16	529	2.81883
ER11	1.09	2022	2022-10	0.440096	0.027785	0.28929	0.0608025	0.0529159	0.284508	0.437149	0.360872	0.398992	0.420482	0.721835	0.356838	0.510107	0.459877	1.25681	23	8.30005	9.17681	9.67108	16.6022	8.20727	1462.4	529	2.76446
LJ15	0.37	2022	2022-08	0.287638	0.256041	0.184088	0.00837954	0.0190406	0.0700798	0.0581608	0.151768	0.419251	0.466845	0.544845	0.720692	0.51001	0.54525	0.426611	21	3.18714	8.80427	9.80375	11.4417	15.1345	998.851	441	2.26497
IB31	3.97	2021	2021-05	0.205285	0.194645	0.0744585	0.0452778	0.0491185	0.0444076	0.0325697	0.284646	0.518328	0.155085	0.625257	0.894663	0.509916	0.443638	4.57731	21	5.97757	10.8849	3.25678	13.1304	18.7879	1143.05	441	2.59196
KS19	0.35	2022	2022-02	0.280352	0.0235029	0.415786	0.08461	0.101739	0.291048	0.150846	0.475636	1	0.613559	0.26823	0.749066	0.509886	0.472301	0.403538	23	10.9396	23	14.1119	6.16928	17.2285	1355.11	529	2.56164
LX13	0.4	2021	2021-05	0.356533	0.0552942	0.472288	0.0138015	0.0130724	0.104229	0.106496	0.249806	0.174874	0.401344	0.561686	0.59596	0.509751	0.44718	0.46117	23	5.74553	4.02209	9.2309	12.9188	13.7071	1192.21	529	2.2537
GF19	1.07	2021	2021-11	0.242995	0.329945	0.139353	0.268323	0.238903	0.140734	0.130518	0.768233	0.679425	0.22804	0.677482	0.578634	0.509674	0.515295	1.23361	23	17.6694	15.6268	5.24491	15.5821	13.3086	1390.14	529	2.62786
GE15	1	2022	2022-09	0.176899	0.489038	0.128222	0.0524323	0.0377298	0.0071349	0.00544909	0.675923	0.322896	0.649427	0.528193	0.480546	0.509577	0.529763	1.15287	22	14.8703	7.10372	14.2874	11.6202	10.572	1079.83	484	2.23106
DE29	1.25	2021	2021-06	0.345681	0.48398	0.162856	0.0315964	0.00888239	0.0397567	0.0523303	1	0.104828	0	0.875087	0.664633	0.508874	0.500179	1.44083	21	21	2.20139	0	18.3768	13.9573	938.608	441	2.12836
NS1B	0.21	2021	2021-09	0.297161	0.12104	0.317855	0.0656752	0.110743	0.0622225	0.10341	0.117169	0.109643	0.645251	0.376658	0.686068	0.50882	0.425612	0.242056	22	2.57771	2.41214	14.1955	8.28649	15.0935	1348.74	484	2.78665
JZ19	0.43	2021	2021-04	0.296615	0.0492056	0.409991	0.22743	0.138434	0.115321	0.163356	0.780154	0.188509	1	0.470458	0.102373	0.508672	0.451097	0.495619	23	17.9435	4.3357	23	10.8205	2.35458	1349.17	529	2.55041
LK1B	1.67	2022	2022-01	0.221983	0.151339	0.292768	0.036411	0.0234044	0.0204428	0.0478906	1	0.117047	0.548126	0.773378	0.30132	0.508468	0.427126	1.92474	21	21	2.45799	11.5106	16.2409	6.32772	1226.05	441	2.78015
KS19	0.35	2021	2021-11	0.399338	0.0139464	0.378433	0.0773921	0.101739	0.15198	0.150846	0.43506	0.324592	0	0.565774	0.95231	0.507981	0.472301	0.403338	23	10.0064	7.46562	0	13.0128	21.9031	1355.11	529	2.56164
HR11	1.15	2021	2021-08	0.392626	0.1	0.22289	0.0477386	0.0311706	0.358095	0.350234	0.738327	0.456332	0.764494	0.235957	0.680284	0.507914	0.453473	1.32523	23	16.9815	10.4956	17.5834	5.42701	15.6465	1352.27	529	2.55627
GR11	1.03	2021	2021-11	0.349239	0.119753	0.285394	0.0358141	0.0496398	0.51052	0.391391	0.24565	0.858478	0.877675	0.444947	0.274334	0.507634	0.467597	1.18686	23	5.64996	19.745	20.1865	10.2338	6.30968	1439.09	529	2.72039
LJ13	0.5	2021	2021-08	0.36388	0.180941	0.174564	0.00621224	0.0108265	0.0859234	0.0824836	0.148296	0.382397	0.552655	0.441941	0.784299	0.507618	0.525104	0.576143	21	3.11422	8.03034	11.6058	9.28077	16.4703	1012.11	441	2.29504
DE29	1.25	2022	2022-04	0.232018	0.701368	0.165666	0.00484957	0.00888239	0.0450096	0.0523303	0.153485	0.135804	0.67952	0.46281	0.631799	0.507474	0.500179	1.4403	21	3.22319	2.85188	14.2699	9.719	13.2678	938.608	441	2.12836
GF29	1.03	2021	2021-07	0.211167	0.461288	0.142427	0.164245	0.170692	0.076379	0.0736156	0.527181	0.471979	0.782045	0.121002	0.820997	0.507424	0.502525	1.18679	23	12.1252	10.8555	17.987	2.78304	18.8829	1405.73	529	2.65733
LJ15	0.37	2022	2022-07	0.12017	0.411961	0.147283	0.0102468	0.0190406	0.0295908	0.0581608	0.185587	0.177026	1	0.058348	0.850509	0.507367	0.54525	0.426318	21	3.89733	3.71755	21	1.22531	17.8607	998.851	441	2.26497
FR39	0.4	2021	2021-02	0.314426	0.178403	0.361256	0.0431453	0.0645918	0.221056	0.319846	0.291948	0.0182644	0.53106	0.294701	0.830285	0.507295	0.415887	0.460875	23	6.71481	0.420081	12.2144	6.77812	19.0966	1539.6	529	2.9104
JS29	0.65	2022	2022-02	0.436595	0.0136164	0.13231	0.406992	0.366384	0.194487	0.173379	0.815557	0.50665	0.511789	0.211101	0.951255	0.506968	0.403045	0.748859	23	18.7578	11.6529	11.7712	4.85531	21.8789	1616.09	529	3.05499
HZ13	0.62	2021	2021-07	0.249967	0.0623118	0.295225	0.247048	0.224733	0.227841	0.156183	0.583619	1	0.420136	0.282375	0.929345	0.506951	0.4508	0.714293	23	13.4232	23	9.66313	6.49461	21.3749	1494.59	529	2.82532
EX1A	0.53	2021	2021-06	0.399804	0.0198363	0.390348	0.0891317	0.0884604	0.229664	0.180266	0.702092	0.729313	0.511353	0.529902	0.529607	0.506863	0.413818	0.610591	23	16.1481	16.7742	11.7611	12.1877	12.181	1664.09	529	3.14574
LJ13	0.5	2021	2021-04	0.519332	0.127647	0.189436	0.00498199	0.0108265	0.0564874	0.0824836	0.118928	0.191977	0	0.876341	0.696328	0.506733	0.525104	0.57601	21	2.49749	4.03152	0	18.4032	14.6229	1012.11	441	2.29504
ES21	1.23	2021	2021-05	0.339917	0.0220366	0.407622	0.0507657	0.0905895	0.206835	0.179934	0	0.634199	0.793764	0.423437	0.400468	0.506639	0.323338	1.41695	23	0	14.5866	18.2566	9.73906	9.21076	1644.7	529	3.10906
BZ13	0.68	2022	2022-06	0.23186	0	0.341183	0.350927	0.480774	0.225297	0.194567	0.103574	0.688957	0.172553	1	0.183727	0.506583	0.477125	0.783343	23	2.3822	15.846	3.96873	23	4.22571	1327.2	529	2.50888
GF19	1.07	2021	2021-12	0.221381	0.36647	0.133134	0.249206	0.238903	0.153471	0.130518	0.619382	0.8437	0.427971	0.48593	0.666831	0.50656	0.515295	1.23261	23	14.2458	19.4051	9.84332	11.1764	15.3371	1390.14	529	2.62786
KD19	2.42	2022	2022-10	0.190289	0.563138	0.191826	0.0604664	0.0503618	0.034585	0.0174265	0.758629	0.748366	0.536018	0.285714	1	0.506323	0.572877	2.78759	21	15.9312	15.7157	11.2564	6	21	1034.8	441	2.34649
NF1A	0.72	2022	2022-11	0.224081	0.512565	0.214974	0.104666	0.0606467	0.0668078	0.0544711	0.8373	0.59883	0.734924	0.196324	0.763236	0.506225	0.519567	0.829345	23	19.2579	13.7731	16.9032	4.51544	17.5544	1285.63	529	2.4303
HZ13	0.62	2021	2021-09	0.332471	0.0184757	0.401619	0.150352	0.224733	0.129308	0.156183	0.316226	0.322165	0	0.787222	0.663025	0.50596	0.4508	0.714108	23	7.27321	7.40979	0	18.1061	15.2496	1494.59	529	2.82532
KS19	0.35	2021	2021-09	0.369663	0.0156399	0.388482	0.0997233	0.101739	0.143655	0.150846	0.560595	0.28416	0.15302	0.513045	0.897631	0.505838	0.472301	0.403113	23	12.8937	6.53568	3.51947	11.8	20.6455	1355.11	529	2.56164
KT15	0.43	2021	2021-04	0.152766	0.0509489	0.580893	0.161327	0.128678	0.235596	0.20209	0.818035	0.503806	0.567787	0.558842	0.440311	0.505837	0.517606	0.495253	23	18.8148	11.5875	13.0591	12.8534	10.1271	1314	529	2.48393
ES23	0.59	2022	2022-01	0.379696	0.0104981	0.400832	0.0706389	0.0840708	0.223381	0.204605	0.448136	0.560794	0	0.685725	0.800796	0.505832	0.400598	0.679532	23	10.3071	12.8983	0	15.7717	18.4183	1556.54	529	2.94243
GR13	0.69	2022	2022-11	0.262791	0.0895818	0.425454	0.0433697	0.0595323	0.297081	0.382276	0.159772	0.201003	0.873056	0.471909	0.264355	0.505784	0.465338	0.794697	23	3.67475	4.62306	20.0803	10.8539	6.08017	1252.45	529	2.36759
BR23	0.61	2022	2022-01	0.323024	0.0116076	0.440789	0.10481	0.136941	0.233446	0.177379	0.0370219	1	0.235478	0.722387	0.51203	0.50575	0.542907	0.702552	23	0.851503	23	5.416	16.6149	11.7767	1127.41	529	2.1312
GZ19	0.54	2021	2021-08	0.282415	0.218338	0.328591	0.109993	0.10713	0.0811295	0.0936129	0.561354	0.159414	0.0717764	0.614941	0.832573	0.505612	0.505005	0.621909	23	12.9111	3.66652	1.65086	14.1436	19.1492	1288.44	529	2.43561
LS11	0.83	2022	2022-04	0.184028	0	0.577916	0.0651962	0.099655	0.257987	0.289866	0.297819	0.380423	0.461613	1	0	0.505551	0.457921	0.955882	22	6.55202	8.36931	10.1555	22	0	1328.67	484	2.7452
GV13	0.77	2022	2022-11	0.389799	0.122626	0.320883	0.145972	0.0981922	0.160088	0.0874161	0.396645	0.604726	0.502367	0.367516	0.773942	0.505219	0.437611	0.886706	23	9.12283	13.9087	11.5544	8.45287	17.8007	1227.64	529	2.32069
NZ19	0.21	2021	2021-01	0.296733	0.10018	0.402779	0.109705	0.0720471	0.136645	0.143466	0.667678	0.409545	0.573539	0.449397	0.595068	0.505059	0.421082	0.241819	23	15.3566	9.41953	13.1914	10.3361	13.6866	1439.27	529	2.72075
GE15	1	2021	2021-06	0.174599	0.450742	0.155388	0.0390888	0.0377298	6.9567e-05	0.00544909	0.461081	0.00314832	0.659191	0.709762	0.225572	0.504854	0.529763	1.15146	22	10.1438	0.069263	14.5022	15.6148	4.96258	1079.83	484	2.23106
XJ1B	0.43	2022	2022-06	0.383561	0.227765	0.142697	0.00655556	0.0155488	0.110725	0.0794125	0.0751268	0.475119	0	0.733034	1	0.504641	0.536699	0.495099	20	1.50254	9.50239	0	14.6607	20	881.264	400	2.20316
GD29	0.85	2021	2021-05	0.205964	0.396899	0.12219	0.0622482	0.0570351	0	0.00235607	0.398575	0	1	0.219448	0.489901	0.504557	0.521575	0.978662	23	9.16722	0	23	5.04731	11.2677	1093.28	529	2.0667
KT15	0.43	2021	2021-06	0.194868	0.0493565	0.503974	0.187691	0.128678	0.217205	0.20209	1	0.426644	0.251512	0.572631	0.718949	0.504426	0.517606	0.495071	23	23	9.8128	5.78478	13.1705	16.5358	1314	529	2.48393
BU23	0.78	2022	2022-02	0.305389	0	0.27312	0.377088	0.428322	0.126538	0.191235	0.397675	0.391647	0.00555292	1	0.362914	0.504346	0.438033	0.898017	23	9.14652	9.00789	0.127717	23	8.34703	1488.08	529	2.813
IU29	0.3	2021	2021-03	0.206911	0.0105766	0.169598	0.63076	0.558916	0.101833	0.12377	0.924933	0.165199	0.274955	0.402134	0.931518	0.504133	0.475164	0.345372	23	21.2735	3.79958	6.32397	9.24907	21.4249	1578.81	529	2.98452
MZ1A	0.61	2021	2021-02	0.537387	0.138351	0.215195	0.0457432	0.0400342	0.0316845	0.168146	0.406596	0.0149963	0.0736197	0.493723	1	0.503992	0.392102	0.702231	23	9.35171	0.344914	1.69325	11.3556	23	1405.65	529	2.65718
CS1A	0.65	2022	2022-06	0.350589	0.0221293	0.233403	0.285552	0.356348	0.153825	0.235995	0.271211	0.0722054	0.298588	0.731765	0.468004	0.503793	0.470383	0.74824	23	6.23785	1.66073	6.86753	16.8306	10.7641	1297.54	529	2.45282
GZ19	0.54	2022	2022-09	0.233493	0.231877	0.418828	0.11173	0.10713	0.129537	0.0936129	0.586879	1	0.789505	0.494339	0.314567	0.50354	0.505005	0.621574	23	13.4982	23	18.1586	11.3698	7.23504	1288.44	529	2.43561
GE1A	1.33	2022	2022-04	0.207034	0.470135	0.12194	0.0375905	0.0397917	0.0169985	0.0174681	0.303882	0.202145	0.691269	0.24614	0.846697	0.503234	0.541633	1.53079	22	6.6854	4.44719	15.2079	5.41509	18.6273	995.135	484	2.05606
JJ15	0.49	2022	2022-04	0.220631	0.484413	0.233531	0.0924672	0.0702909	0.0751394	0.024715	0.584383	1	0.357264	0.442433	0.884926	0.503216	0.519894	0.563973	22	12.8564	22	7.85981	9.73353	19.4684	1123.01	484	2.32026
FR1B	0.7	2021	2021-12	0.320058	0.027225	0.439753	0.0607104	0.0922667	0.23543	0.237881	0.117558	0.500692	0.525415	0.777192	0.187169	0.503083	0.424261	0.805647	23	2.70384	11.5159	12.0845	17.8754	4.30488	1368.03	529	2.58606
KD19	2.42	2022	2022-08	0.201808	0.519144	0.212344	0.0464029	0.0503618	0.0365245	0.0174265	0.521569	0.794735	0.442212	0.602056	0.682315	0.50301	0.572877	2.78519	21	10.953	16.6894	9.28645	12.6432	14.3286	1034.8	441	2.34649
IC39	2.6	2022	2022-09	0.149734	0.371093	0.101138	0.04211	0.0804234	0.0570088	0.0439479	0.00296011	0.636114	0.761029	0.414917	0.634504	0.502934	0.526481	2.99229	21	0.0621624	13.3584	15.9816	8.71326	13.3246	1096.2	441	2.48571
IG15	0.76	2022	2022-03	0.249994	0.377329	0.189342	0.0876774	0.108034	0.0573062	0.0403671	0.18464	0.471992	0.486487	0.731075	0.561027	0.502901	0.594168	0.874661	20	3.69279	9.43984	9.72974	14.6215	11.2205	794.489	400	1.98622
GF19	1.07	2022	2022-10	0.159538	0.459126	0.123942	0.169659	0.238903	0.1468	0.130518	0	0.75766	1	0	0.797194	0.502791	0.515295	1.2314	23	0	17.4262	23	0	18.3355	1390.14	529	2.62786
GV15	0.58	2022	2022-02	0.265877	0.130266	0.48023	0.0580944	0.0925023	0.0246392	0.0731192	0.237725	0.0693802	0.822829	0.546048	0.224068	0.502707	0.473692	0.667471	23	5.46768	1.59575	18.9251	12.5591	5.15357	1238.57	529	2.34134
HS2B	0.7	2021	2021-03	0.235496	0.0354843	0.482936	0.0395746	0.0463547	0.254282	0.256995	0.271648	0.473421	1	0.580616	0	0.50269	0.484502	0.805565	23	6.2479	10.8887	23	13.3542	0	1296.78	529	2.45139
HS21	1.58	2021	2021-06	0.395196	0.0137786	0.38555	0.0185271	0.0350051	0.155429	0.225783	0.193319	0.145757	0.636084	0.800421	0.0475704	0.502526	0.502306	1.8182	23	4.44633	3.35242	14.6299	18.4097	1.09412	1292.2	529	2.44273
EB19	6.81	2022	2022-08	0.128783	0.304611	0.0851008	0.0207355	0.0284104	0.0152163	0.0134939	0.308211	0.39532	0.360654	0.688928	0.644163	0.502486	0.555324	7.83658	21	6.47243	8.30171	7.57374	14.4675	13.5274	1040.63	441	2.35969
KT15	0.43	2021	2021-07	0.172547	0.0211447	0.636602	0.11853	0.128678	0.180527	0.20209	0.522636	0.272759	0.419186	0.816911	0.238506	0.502036	0.517606	0.494763	23	12.0206	6.27346	9.64129	18.789	5.48565	1314	529	2.48393
BX29	0.71	2021	2021-07	0.285152	0.00144715	0.252772	0.468199	0.564496	0.167052	0.156285	0.143693	0.480362	0.263792	0.912774	0.252461	0.501657	0.469312	0.816853	23	3.30494	11.0483	6.06721	20.9938	5.80659	1355.74	529	2.56283
FW19	0.53	2022	2022-03	0.314855	0.0362104	0.496037	0.0555228	0.0826931	0.0890451	0.138831	0.180991	0.130409	0.720114	0.767751	0.0168609	0.501519	0.48179	0.609742	23	4.16279	2.9994	16.5626	17.6583	0.387802	1240.08	529	2.34419
KT13	0.55	2022	2022-01	0.275655	0.048444	0.467854	0.0840132	0.114696	0.160652	0.237626	0.292791	0.326157	0.355714	0.530235	0.702723	0.501316	0.440505	0.632717	23	6.73418	7.50162	8.18142	12.1954	16.1626	1458.13	529	2.75639
DE29	1.25	2022	2022-01	0.178411	0.733829	0.182753	0.0025906	0.00888239	0.0539654	0.0523303	0.0819906	0.188616	1	0.401247	0.432143	0.501308	0.500179	1.43799	21	1.7218	3.96093	21	8.42619	9.075	938.608	441	2.12836
GF29	1.03	2021	2021-10	0.20759	0.487227	0.116743	0.21407	0.170692	0.0615232	0.0736156	0.911052	0.0378267	0.809704	0.0401016	0.943785	0.501111	0.502525	1.18484	23	20.9542	0.870013	18.6232	0.922337	21.707	1405.73	529	2.65733
LX13	0.4	2021	2021-01	0.416161	0.0318061	0.471647	0.00129305	0.0130724	0.0555005	0.106496	0.023404	0.038489	0.145266	0.747874	0.597777	0.501008	0.44718	0.460121	23	0.538292	0.885246	3.34113	17.2011	13.7489	1192.21	529	2.2537
MB19	2.52	2022	2022-04	0.220638	0.3427	0.150349	0.0317972	0.0322193	0.059023	0.0486278	0.313088	0.478337	1	0.039718	0.936782	0.500967	0.52011	2.89873	21	6.57484	10.0451	21	0.834078	19.6724	986.285	441	2.23647
GV15	0.58	2021	2021-05	0.283828	0.142555	0.446764	0.213467	0.0925023	0.0713017	0.0731192	1	0.219219	0.75994	0.503222	0.351001	0.500899	0.473692	0.667156	23	23	5.04205	17.4786	11.5741	8.07302	1238.57	529	2.34134
LU1A	0.58	2022	2022-06	0.327029	0.0553526	0.389253	0.072042	0.0785105	0.0981823	0.154108	0.476251	0.076093	0.0492522	0.6072	0.886359	0.500876	0.438181	0.667152	23	10.9538	1.75014	1.1328	13.9656	20.3863	1417.26	529	2.67913
GZ19	0.54	2022	2022-04	0.262597	0.224986	0.35869	0.137837	0.10713	0.118644	0.0936129	0.970409	0.810853	0.362528	0.555721	0.659787	0.50053	0.505005	0.621086	23	22.3194	18.6496	8.33816	12.7816	15.1751	1288.44	529	2.43561
IT21	1.4	2021	2021-06	0.298202	0.000270997	0.593624	0.0751154	0.350215	0.114188	0.16763	0.0315122	0.139838	0.410757	0.995354	0	0.500423	0.394419	1.61018	23	0.724782	3.21629	9.44742	22.8931	0	1565.72	529	2.95978
LJ13	0.5	2022	2022-06	0.356919	0.112477	0.306457	0.0418908	0.0108265	0.0775948	0.0824836	1	0.32852	0.577402	1	0.00411802	0.500387	0.525104	0.575058	21	21	6.89891	12.1254	21	0.0864785	1012.11	441	2.29504
IU29	0.3	2021	2021-06	0.20188	0.0105322	0.172524	0.639644	0.558916	0.0958244	0.12377	0.937959	0.10153	0.322644	0.404642	0.910865	0.500276	0.475164	0.345025	23	21.5731	2.33519	7.4208	9.30676	20.9499	1578.81	529	2.98452
GE1A	1.33	2022	2022-07	0.258011	0.459823	0.11102	0.037004	0.0397917	0.00212421	0.0174681	0.296653	0.025261	0.461378	0.304971	1	0.500145	0.541633	1.52956	22	6.52636	0.555741	10.1503	6.70937	22	995.135	484	2.05606
IT21	1.4	2021	2021-02	0.446867	0.00313344	0.401521	0.0534277	0.350215	0.253289	0.16763	0	0.950799	0	0.946277	0.466239	0.499755	0.394419	1.6099	23	0	21.8684	0	21.7644	10.7235	1565.72	529	2.95978
ER11	1.09	2021	2021-08	0.444982	0.0408182	0.242904	0.0272856	0.0529159	0.566356	0.437149	0.0582405	0.975307	0.395419	0.591355	0.584251	0.499691	0.459877	1.2534	23	1.33953	22.4321	9.09463	13.6012	13.4378	1462.4	529	2.76446
GF29	1.03	2021	2021-06	0.198509	0.48546	0.129003	0.1868	0.170692	0.0697457	0.0736156	0.700952	0.278126	0.879924	0.0456131	0.885169	0.499687	0.502525	1.1844	23	16.1219	6.39689	20.2382	1.0491	20.3589	1405.73	529	2.65733
IB33	3.5	2022	2022-04	0.114257	0.283221	0.0938589	0.0657497	0.0632326	0.0373607	0.0367732	0.596256	0.333915	0.721369	0.481001	0.59642	0.499627	0.46012	4.02461	21	12.5214	7.01221	15.1488	10.101	12.5248	1189.67	441	2.69767
KT13	0.55	2022	2022-10	0.235973	0.00771567	0.724317	0.00489844	0.114696	0.0548355	0.237626	0.0170713	0	0.520239	0.92518	0	0.499493	0.440505	0.632416	23	0.392641	0	11.9655	21.2792	0	1458.13	529	2.75639
ER11	1.09	2021	2021-01	0.522062	0.0391936	0.169796	0.0305411	0.0529159	0.493763	0.437149	0.0876353	0.826872	0	0.60762	0.942666	0.499367	0.459877	1.25329	23	2.01561	19.0181	0	13.9752	21.6813	1462.4	529	2.76446
LX15	0.25	2021	2021-08	0.412772	0.0719806	0.257208	0.0161918	0.02731	0.126259	0.0865126	0.17545	0.735224	0.0549757	0.58758	1	0.499161	0.505016	0.287437	22	3.85991	16.1749	1.20947	12.9268	22	1150.3	484	2.37665
KD19	2.42	2022	2022-02	0.256108	0.499228	0.196866	0.0655265	0.0503618	0.00494431	0.0174265	0.843926	0.0397445	0	0.745265	0.921972	0.499129	0.572877	2.78237	21	17.7224	0.834634	0	15.6506	19.3614	1034.8	441	2.34649
BZ11	1.46	2021	2021-10	0.279983	0	0.275687	0.397791	0.517339	0.0836459	0.156069	0.286089	0	0.0948246	1	0.304255	0.498943	0.400378	1.67854	23	6.58005	0	2.18096	23	6.99787	1526.56	529	2.88575
JJ15	0.49	2022	2022-06	0.284267	0.332874	0.280443	0.0688346	0.0702909	0.0661875	0.024715	0.412767	0.880862	0	0.922535	0.587462	0.498608	0.519894	0.563295	22	9.08087	19.379	0	20.2958	12.9242	1123.01	484	2.32026
LS13	0.66	2021	2021-12	0.206755	0.0060568	0.547984	0.067863	0.0910102	0.29678	0.294168	0.167603	0.578584	0	0.635757	0.907329	0.498442	0.422319	0.758692	23	3.85486	13.3074	0	14.6224	20.8686	1532.27	529	2.89655
BZ11	1.46	2021	2021-11	0.286324	0	0.265921	0.391505	0.517339	0.102958	0.156069	0.275279	0.142563	0.0652547	1	0.334583	0.498383	0.400378	1.67829	23	6.33141	3.27895	1.50086	23	7.69541	1526.56	529	2.88575
LX15	0.25	2022	2022-08	0.307222	0.0878824	0.359087	0.0304541	0.02731	0.0370099	0.0865126	0.329993	0.184872	0.41713	0.496469	0.780653	0.498266	0.505016	0.28737	22	7.25985	4.06717	9.17687	10.9223	17.1744	1150.3	484	2.37665
HS2B	0.7	2022	2022-02	0.376389	0.0350691	0.377487	0.0377425	0.0463547	0.107945	0.256995	0.248782	0	0.282803	0.585638	0.704626	0.49819	0.484502	0.80462	23	5.72199	0	6.50446	13.4697	16.2064	1296.78	529	2.45139
KT13	0.55	2022	2022-04	0.237776	0.04067	0.558842	0.117294	0.114696	0.18389	0.237626	0.408777	0.397786	0.512766	0.60562	0.45341	0.498174	0.440505	0.632199	23	9.40187	9.14907	11.7936	13.9293	10.4284	1458.13	529	2.75639
FR11	1.17	2021	2021-09	0.399203	0.0383852	0.309916	0.079991	0.10025	0.150577	0.217633	0.235535	0.275818	0	0.66546	0.865958	0.498133	0.421599	1.34484	23	5.4173	6.34381	0	15.3056	19.917	1460.76	529	2.76136
CS1A	0.65	2021	2021-12	0.303301	0.0473161	0.174992	0.376548	0.356348	0.284538	0.235995	0.508138	0.426665	0.495425	0.426469	0.722655	0.498069	0.470383	0.747123	23	11.6872	9.81329	11.3948	9.80879	16.6211	1297.54	529	2.45282
EX1A	0.53	2021	2021-07	0.460577	0.0243403	0.260642	0.114095	0.0884604	0.314904	0.180266	0.89873	1	0.227406	0.423161	1	0.498049	0.413818	0.60919	23	20.6708	23	5.23035	9.7327	23	1664.09	529	3.14574
IU29	0.3	2021	2021-08	0.235917	0.00659731	0.170209	0.608046	0.558916	0.0910007	0.12377	0.891625	0.0504173	0	0.627072	0.927203	0.498032	0.475164	0.344823	23	20.5074	1.1596	0	14.4227	21.3257	1578.81	529	2.98452
BX29	0.71	2021	2021-10	0.318027	0.00134028	0.218455	0.488884	0.564496	0.13154	0.156285	0.207086	0.26886	0.0827236	0.919216	0.43083	0.497965	0.469312	0.816067	23	4.76298	6.18378	1.90264	21.142	9.90909	1355.74	529	2.56283
LU15	0.45	2021	2021-06	0.287179	0.178042	0.361008	0.0484693	0.0523768	0.163951	0.10409	0.412163	0.532802	0.555526	0.203637	0.984237	0.497898	0.437	0.517216	23	9.47974	12.2545	12.7771	4.68366	22.6375	1296.79	529	2.45139
LJ13	0.5	2021	2021-05	0.383468	0.169601	0.179242	0.00312364	0.0108265	0.0952098	0.0824836	0.0745662	0.44247	0.483018	0.53437	0.756628	0.497615	0.525104	0.574642	21	1.56589	9.29187	10.1434	11.2218	15.8892	1012.11	441	2.29504
LF19	1.65	2021	2021-12	0.241221	0.202831	0.265241	0.0865772	0.0652014	0.0397152	0.0706643	0.863143	0.0828534	0.130826	0.88301	0.612161	0.497465	0.507166	1.89625	21	18.126	1.73992	2.74736	18.5432	12.8554	1159.26	441	2.62871
BR23	0.61	2022	2022-03	0.345207	0.00736708	0.417047	0.140274	0.136941	0.194513	0.177379	0.276865	0.609135	0	0.823805	0.648237	0.497193	0.542907	0.700986	23	6.3679	14.0101	0	18.9475	14.9094	1127.41	529	2.1312
NS1B	0.21	2021	2021-06	0.389337	0.0815211	0.271791	0.074285	0.110743	0.0952313	0.10341	0.175734	0.376473	0.185323	0.580177	0.891715	0.497157	0.425612	0.241321	22	3.86614	8.28241	4.07712	12.7639	19.6177	1348.74	484	2.78665
JJ15	0.49	2021	2021-02	0.106146	0.413238	0.372688	0.0501765	0.0702909	0	0.024715	0.277275	0	1	0.667927	0.00253605	0.497103	0.519894	0.563074	22	6.10004	0	22	14.6944	0.0557931	1123.01	484	2.32026
HC3B	2.1	2022	2022-08	0.211621	0.32428	0.129542	0.0364627	0.0561504	0.0135178	0.0136239	0.454079	0.22824	0.776237	0.173406	0.820663	0.497019	0.533606	2.41312	23	10.4438	5.24951	17.8534	3.98835	18.8752	1284.73	529	2.4286
ES25	0.31	2022	2022-08	0.300341	0.000818894	0.415443	0.0697087	0.108724	0.230826	0.184974	0.346919	0.841723	0.278545	0.958756	0.277496	0.496951	0.493476	0.356216	22	7.63223	18.5179	6.12799	21.0926	6.10492	1295.21	484	2.67605
NF1A	0.72	2022	2022-10	0.174307	0.483241	0.283365	0.0293361	0.0606467	0.085615	0.0544711	0.0950585	0.777592	1	0.269323	0.480174	0.496942	0.519567	0.82734	23	2.18635	17.8846	23	6.19443	11.044	1285.63	529	2.4303
FW19	0.53	2021	2021-02	0.475021	0.0030643	0.350471	0.0881788	0.0826931	0.0576791	0.138831	0.436154	0.0211664	0	0.980346	0.433947	0.496914	0.48179	0.609009	23	10.0315	0.486827	0	22.548	9.98079	1240.08	529	2.34419
LX13	0.4	2022	2022-02	0.29004	0.105057	0.358179	0.0206789	0.0130724	0.0627693	0.106496	0.374285	0.0588333	0.686906	0.167217	0.919427	0.496722	0.44718	0.459607	23	8.60855	1.35317	15.7988	3.84599	21.1468	1192.21	529	2.2537
LX15	0.25	2021	2021-01	0.428795	0.0217328	0.41373	0.0114094	0.02731	0.117848	0.0865126	0.123629	0.683358	0	0.87548	0.663007	0.496671	0.505016	0.28725	22	2.71984	15.0339	0	19.2606	14.5861	1150.3	484	2.37665
BR21	1.15	2021	2021-04	0.277872	0.0177677	0.434385	0.185241	0.131895	0.122125	0.206899	0.85203	0	0.832849	0.651685	0.106774	0.496609	0.479396	1.32133	23	19.5967	0	19.1555	14.9888	2.45581	1454.44	529	2.74942
GE15	1	2021	2021-09	0.32985	0.389528	0.127257	0.0209499	0.0377298	0.00742156	0.00544909	0.169028	0.335869	0	1	0.489605	0.496146	0.529763	1.14884	22	3.71861	7.38912	0	22	10.7713	1079.83	484	2.23106
IS2A	0.55	2021	2021-02	0.403929	0.01651	0.28393	0.306081	0.495418	0.118201	0.129157	0.269457	0.357254	0	0.974162	0.443271	0.49605	0.390088	0.631848	23	6.19751	8.21684	0	22.4057	10.1952	1630.21	529	3.08168
ER11	1.09	2021	2021-10	0.478794	0.0345342	0.223118	0.0466194	0.0529159	0.529433	0.437149	0.23281	0.899808	0.221963	0.654266	0.681254	0.496007	0.459877	1.25219	23	5.35462	20.6956	5.10516	15.0481	15.6688	1462.4	529	2.76446
GF19	1.07	2022	2022-07	0.205027	0.400187	0.122423	0.236723	0.238903	0.102923	0.130518	0.522179	0.191772	0.579242	0.309102	0.818731	0.495965	0.515295	1.2292	23	12.0101	4.41075	13.3226	7.10935	18.8308	1390.14	529	2.62786
GR13	0.69	2022	2022-07	0.409432	0.0723628	0.342323	0.0161038	0.0595323	0.43522	0.382276	0.00394518	0.574985	0.424493	0.598265	0.559488	0.495723	0.465338	0.792615	23	0.0907392	13.2247	9.76333	13.7601	12.8682	1252.45	529	2.36759
IU19	0.3	2022	2022-01	0.207644	0.0285919	0.23846	0.511908	0.451108	0.14934	0.145262	0.877343	0.557064	0.530377	0.38306	0.769512	0.495661	0.538226	0.344609	23	20.1789	12.8125	12.1987	8.81037	17.6988	1389.42	529	2.62649
GF29	1.03	2022	2022-01	0.204178	0.473887	0.123115	0.191936	0.170692	0.0703272	0.0736156	0.740523	0.295118	0.836087	0.081708	0.913321	0.495621	0.502525	1.18315	23	17.032	6.78773	19.23	1.87928	21.0064	1405.73	529	2.65733
NF1A	0.72	2021	2021-05	0.242663	0.494047	0.187895	0.112445	0.0606467	0.045194	0.0544711	0.913951	0.393391	0.635959	0.242422	0.875315	0.495383	0.519567	0.827003	23	21.0209	9.04798	14.627	5.57572	20.1322	1285.63	529	2.4303
NF15	0.7	2022	2022-05	0.263167	0.354241	0.280469	0.0753309	0.0769177	0.0456224	0.0600122	0.484258	0.236603	0.632161	0.695414	0.22469	0.495279	0.511415	0.804009	23	11.1379	5.44186	14.5397	15.9945	5.16786	1334.73	529	2.52312
KS19	0.35	2021	2021-10	0.385736	0.00884837	0.420037	0.0802826	0.101739	0.114858	0.150846	0.45131	0.144303	0.0701395	0.724503	0.725936	0.495229	0.472301	0.401999	23	10.3801	3.31897	1.61321	16.6636	16.6965	1355.11	529	2.56164
IB31	3.97	2021	2021-03	0.154094	0.206284	0.0805183	0.0270126	0.0491185	0.0275877	0.0325697	0.0322447	0.310269	0.440899	0.527857	0.817523	0.495098	0.443638	4.55966	21	0.677138	6.51565	9.25887	11.085	17.168	1143.05	441	2.59196
FW19	0.53	2022	2022-05	0.376793	0.000907237	0.499657	0.0369849	0.0826931	0.134501	0.138831	0.0361413	0.288724	0.441639	0.994181	0.00648841	0.49495	0.48179	0.608697	23	0.83125	6.64066	10.1577	22.8662	0.149233	1240.08	529	2.34419
HC3B	2.1	2022	2022-03	0.217094	0.330343	0.117536	0.0643993	0.0561504	0.00846976	0.0136239	0.80198	0.143007	0.722221	0.15795	0.918814	0.494933	0.533606	2.41181	23	18.4455	3.28917	16.6111	3.63284	21.1327	1284.73	529	2.4286
GF29	1.03	2021	2021-09	0.202716	0.465332	0.128853	0.225615	0.170692	0.0622204	0.0736156	1	0.0582003	0.847392	0.10839	0.885887	0.494922	0.502525	1.18293	23	23	1.33861	19.49	2.49298	20.3754	1405.73	529	2.65733
TT19	0.63	2021	2021-09	0.119308	0.0188496	0.307708	0.348304	0.315997	0.31642	0.307573	0.53614	0.632368	0.557101	0.556581	0.490839	0.494772	0.47371	0.723512	23	12.3312	14.5445	12.8133	12.8014	11.2893	1418.39	529	2.68126
IU29	0.3	2021	2021-11	0.219262	0.00706685	0.184046	0.60368	0.558916	0.100116	0.12377	0.885222	0.147003	0.15788	0.60053	0.829514	0.494747	0.475164	0.344527	23	20.3601	3.38107	3.63123	13.8122	19.0788	1578.81	529	2.98452
BR25	0.2	2022	2022-01	0.301349	0.00320453	0.482872	0.102463	0.173356	0.188382	0.188717	0.114693	0.362573	0.286413	0.913451	0.256003	0.494706	0.520874	0.229682	23	2.63793	8.33919	6.58751	21.0094	5.88807	1199.12	529	2.26677
GD29	0.85	2022	2022-07	0.273174	0.367548	0.104552	0.0565866	0.0570351	0.00396881	0.00235607	0.337742	0.391362	0.506116	0.435626	0.707977	0.494569	0.521575	0.976115	23	7.76808	9.00134	11.6407	10.0194	16.2835	1093.28	529	2.0667
GF19	1.07	2022	2022-05	0.222023	0.383121	0.120563	0.228071	0.238903	0.118114	0.130518	0.454815	0.387687	0.422028	0.398601	0.845104	0.494504	0.515295	1.22874	23	10.4607	8.9168	9.70666	9.16783	19.4374	1390.14	529	2.62786
LS11	0.83	2022	2022-05	0.176848	0	0.575632	0.0754878	0.099655	0.14773	0.289866	0.366575	0	0.516516	1	0.0118072	0.494456	0.457921	0.95312	22	8.06464	0	11.3633	22	0.259759	1328.67	484	2.7452
NF15	0.7	2022	2022-10	0.215315	0.42695	0.286964	0.0750254	0.0769177	0.0562144	0.0600122	0.479184	0.37971	0.999733	0.490931	0.178407	0.494391	0.511415	0.803822	23	11.0212	8.73333	22.9939	11.2914	4.10335	1334.73	529	2.52312
LS11	0.83	2021	2021-05	0.113625	0.117349	0.384539	0.136779	0.099655	0.435087	0.289866	0.776044	0.99147	1	0	1	0.494258	0.457921	0.95307	22	17.073	21.8123	22	0	22	1328.67	484	2.7452
LX13	0.4	2021	2021-06	0.290637	0.062081	0.528384	0.0199542	0.0130724	0.166775	0.106496	0.361169	0.349932	0.684339	0.507887	0.436943	0.494212	0.44718	0.459305	23	8.30688	8.04843	15.7398	11.6814	10.0497	1192.21	529	2.2537
GF29	1.03	2021	2021-02	0.182981	0.492567	0.13464	0.108292	0.170692	0.0703619	0.0736156	0.0960889	0.296131	1	0.0234468	0.858221	0.4942	0.502525	1.18271	23	2.21004	6.81102	23	0.539276	19.7391	1405.73	529	2.65733
MS15	0.35	2021	2021-04	0.290534	0.0748626	0.426164	0.034716	0.0708821	0.241862	0.297474	0.140614	0.232446	0.661774	0.597974	0.336733	0.494054	0.432348	0.401876	23	3.23412	5.34627	15.2208	13.7534	7.74487	1330.16	529	2.51447
FW19	0.53	2022	2022-02	0.437363	0	0.412153	0.0609221	0.0826931	0.0858327	0.138831	0.223179	0.119221	0.169311	1	0.257209	0.493791	0.48179	0.608513	23	5.13311	2.74207	3.89416	23	5.91581	1240.08	529	2.34419
LX13	0.4	2021	2021-03	0.291085	0.086099	0.420091	0.00361388	0.0130724	0.399036	0.106496	0.0654107	1	0.682415	0.317498	0.743924	0.493765	0.44718	0.459252	23	1.50445	23	15.6955	7.30244	17.1103	1192.21	529	2.2537
HZ13	0.62	2022	2022-02	0.311759	0.0254694	0.376653	0.163546	0.224733	0.186644	0.156183	0.352713	0.716595	0.105471	0.706677	0.725519	0.493758	0.4508	0.711839	23	8.11241	16.4817	2.42584	16.2536	16.6869	1494.59	529	2.82532
KT15	0.43	2022	2022-09	0.228349	0.0445243	0.434749	0.144098	0.128678	0.225233	0.20209	0.699115	0.460325	0	0.614472	0.969717	0.493679	0.517606	0.493685	23	16.0796	10.5875	0	14.1329	22.3035	1314	529	2.48393
IU29	0.3	2022	2022-09	0.130422	0.0107821	0.252871	0.570216	0.558916	0.160452	0.12377	0.836153	0.786323	1	0.390518	0.343612	0.493609	0.475164	0.344425	23	19.2315	18.0854	23	8.98191	7.90308	1578.81	529	2.98452
FV29	0.33	2022	2022-06	0.345137	0.0101553	0.484897	0.00752823	0.0944113	0.35781	0.217947	0.0472701	1	0	0.877007	0.617936	0.4936	0.454141	0.378866	23	1.08721	23	0	20.1712	14.2125	1570.81	529	2.9694
GD29	0.85	2022	2022-08	0.27127	0.373305	0.0982113	0.0310914	0.0570351	0.00954297	0.00235607	0.0638055	0.941027	0.520104	0.393227	0.786375	0.493523	0.521575	0.975848	23	1.46753	21.6436	11.9624	9.04421	18.0866	1093.28	529	2.0667
LX15	0.25	2021	2021-02	0.38901	0	0.550319	0.0108974	0.02731	0.0745816	0.0865126	0.118082	0.416557	0.136508	1	0.368929	0.49352	0.505016	0.287014	22	2.5978	9.16425	3.00317	22	8.11645	1150.3	484	2.37665
BU23	0.78	2022	2022-07	0.264311	0	0.340217	0.326405	0.428322	0.191566	0.191235	0.321215	0.592915	0.222269	1	0.206402	0.49351	0.438033	0.895481	23	7.38794	13.637	5.11219	23	4.74725	1488.08	529	2.813
CZ15	0.12	2021	2021-09	0.357183	0.0587845	0.186141	0.405291	0.277073	0.197368	0.279782	0.937087	0.512843	0.226871	0.678988	0.926241	0.493453	0.457082	0.137764	20	18.7417	10.2569	4.53742	13.5798	18.5248	1320.33	400	3.30082
JZ19	0.43	2022	2022-03	0.495114	0.0116371	0.338055	0.0341836	0.138434	0.201654	0.163356	0.0167997	0.573891	0.184454	0.874763	0.416846	0.493441	0.451097	0.493654	23	0.386392	13.1995	4.24245	20.1196	9.58745	1349.17	529	2.55041
BR21	1.15	2021	2021-12	0.354071	0.014371	0.392844	0.102032	0.131895	0.240323	0.206899	0.469304	0.673171	0.302524	0.718275	0.512293	0.493438	0.479396	1.32024	23	10.794	15.4829	6.95806	16.5203	11.7827	1454.44	529	2.74942
KT15	0.43	2021	2021-08	0.184126	0.0278495	0.581944	0.160542	0.128678	0.144811	0.20209	0.81261	0.122913	0.332206	0.758856	0.436506	0.49337	0.517606	0.493645	23	18.69	2.82699	7.64073	17.4537	10.0396	1314	529	2.48393
CB19	1.06	2021	2021-05	0.524696	0.302015	0.146766	0.123386	0.0885956	0.113963	0.132923	0.535784	0.310491	0.839118	0.148158	1	0.493152	0.582083	1.21682	21	11.2515	6.52031	17.6215	3.11133	21	962.807	441	2.18324
FR1B	0.7	2021	2021-03	0.35385	0.0149647	0.427467	0.0358023	0.0922667	0.080332	0.237881	0	0.0775107	0.350787	0.87753	0.2584	0.493117	0.424261	0.803554	23	0	1.78275	8.0681	20.1832	5.94319	1368.03	529	2.58606
GF29	1.03	2021	2021-12	0.186343	0.500085	0.117388	0.19905	0.170692	0.066734	0.0736156	0.795327	0.19011	0.974002	0	0.940701	0.492994	0.502525	1.18234	23	18.2925	4.37253	22.402	0	21.6361	1405.73	529	2.65733
GF29	1.03	2022	2022-03	0.219339	0.446521	0.122181	0.188359	0.170692	0.0752381	0.0736156	0.712961	0.438636	0.718854	0.167061	0.917783	0.492982	0.502525	1.18233	23	16.3981	10.0886	16.5336	3.84241	21.109	1405.73	529	2.65733
GF19	1.07	2022	2022-02	0.229228	0.313063	0.150963	0.288931	0.238903	0.1354	0.130518	0.928694	0.610634	0.355383	0.766017	0.413989	0.492945	0.515295	1.22824	23	21.36	14.0446	8.1738	17.6184	9.52175	1390.14	529	2.62786
GF29	1.03	2021	2021-05	0.197052	0.474046	0.126061	0.204242	0.170692	0.0809748	0.0736156	0.835333	0.606288	0.891192	0.0812126	0.899236	0.492713	0.502525	1.18225	23	19.2127	13.9446	20.4974	1.86789	20.6824	1405.73	529	2.65733
IT21	1.4	2021	2021-08	0.372104	0.00124089	0.487113	0.0801104	0.350215	0.180282	0.16763	0.0387701	0.525166	0.206569	0.978725	0.258505	0.492646	0.394419	1.60691	23	0.891711	12.0788	4.7511	22.5107	5.94562	1565.72	529	2.95978
CU19	0.4	2022	2022-07	0.258536	0.0474985	0.335991	0.277803	0.269089	0.222028	0.252201	0.431648	0.282718	0.626039	0.544178	0.525509	0.492588	0.479634	0.459111	22	9.49626	6.21981	13.7728	11.9719	11.5612	1192.61	484	2.46407
BR13	1.25	2021	2021-03	0.182368	0.0130233	0.0969732	0.76448	0.698179	0.0589371	0.082012	0.651824	0.127356	0.318492	0.538	0.75843	0.492515	0.381516	1.43469	23	14.9919	2.92919	7.32531	12.374	17.4439	1454.95	529	2.75037
LR11	0.95	2022	2022-01	0.256153	0	0.452409	0.0828019	0.110035	0.342193	0.235344	0.310245	0.854598	0.156368	1	0.287116	0.492456	0.455917	1.09035	23	7.13564	19.6557	3.59646	23	6.60367	1499.33	529	2.83428
LS11	0.83	2021	2021-01	0.226476	0	0.503073	0.0206174	0.099655	0.163614	0.289866	0	0.0548044	0.136999	1	0.387027	0.492171	0.457921	0.952551	22	0	1.2057	3.01398	22	8.5146	1328.67	484	2.7452
ET21	0.88	2021	2021-04	0.404121	0.00400259	0.381207	0.0706127	0.0784516	0.228672	0.220253	0.601616	0.63418	0.64021	0.756313	0.15276	0.492118	0.407626	1.00992	23	13.8372	14.5861	14.7248	17.3952	3.51347	1692.94	529	3.20027
GR11	1.03	2022	2022-01	0.465586	0.0283466	0.293462	0.0423943	0.0496398	0.316535	0.391391	0.316162	0.468011	0.370938	0.868614	0.241434	0.492007	0.467597	1.18203	23	7.27174	10.7642	8.53157	19.9781	5.55299	1439.09	529	2.72039
MB19	2.52	2021	2021-06	0.256385	0.289616	0.141896	0.0255847	0.0322193	0.0518876	0.0486278	0.171992	0.348055	0.479598	0.385662	1	0.491893	0.52011	2.89187	21	3.61183	7.30915	10.0716	8.0989	21	986.285	441	2.23647
LR1B	0.77	2022	2022-05	0.201263	0	0.46097	0.116862	0.111484	0.275638	0.311279	0.518253	0.334654	0.0604641	1	0.368509	0.491752	0.504571	0.883595	23	11.9198	7.69704	1.39067	23	8.47571	1340.96	529	2.53489
GE1A	1.33	2021	2021-11	0.279792	0.382517	0.145974	0.0199191	0.0397917	0.00266849	0.0174681	0.0860964	0.0317335	0.363155	0.746019	0.509307	0.491746	0.541633	1.52621	22	1.89412	0.698137	7.9894	16.4124	11.2047	995.135	484	2.05606
GF19	1.07	2022	2022-01	0.241002	0.323903	0.136761	0.254738	0.238903	0.16559	0.130518	0.662455	1	0.246473	0.709166	0.615397	0.491744	0.515295	1.22785	23	15.2365	23	5.66888	16.3108	14.1541	1390.14	529	2.62786
LJ13	0.5	2021	2021-12	0.301461	0.181226	0.199974	0.00652615	0.0108265	0.0961582	0.0824836	0.15579	0.448605	0.774562	0.439621	0.633993	0.491689	0.525104	0.573753	21	3.27158	9.42071	16.2658	9.23203	13.3138	1012.11	441	2.29504
NF1A	0.72	2022	2022-02	0.254672	0.392668	0.261417	0.0830519	0.0606467	0.0336437	0.0544711	0.624334	0.283605	0.572007	0.494802	0.571014	0.491669	0.519567	0.826201	23	14.3597	6.52292	13.1562	11.3804	13.1333	1285.63	529	2.4303
GF29	1.03	2022	2022-05	0.231605	0.350214	0.193211	0.0958201	0.170692	0.0602289	0.0736156	0	0	0.623996	0.467433	0.578214	0.491599	0.502525	1.1819	23	0	0	14.3519	10.751	13.2989	1405.73	529	2.65733
BX29	0.71	2022	2022-04	0.231089	0.00111521	0.298452	0.439518	0.564496	0.232173	0.156285	0.0557954	0.868203	0.56156	0.932782	0.0150326	0.491563	0.469312	0.814703	23	1.28329	19.9687	12.9159	21.454	0.34575	1355.74	529	2.56283
GF29	1.03	2021	2021-01	0.196225	0.450977	0.151013	0.149985	0.170692	0.0621767	0.0736156	0.417311	0.0569255	0.89759	0.153162	0.779947	0.491428	0.502525	1.18185	23	9.59815	1.30929	20.6446	3.52273	17.9388	1405.73	529	2.65733
KD19	2.42	2022	2022-11	0.133316	0.55292	0.220487	0.0502807	0.0503618	0.0354691	0.0174265	0.586935	0.769503	1	0.359186	0.556222	0.491402	0.572877	2.77676	21	12.3256	16.1596	21	7.54291	11.6807	1034.8	441	2.34649
GE15	1	2022	2022-10	0.191945	0.460049	0.134151	0.0669331	0.0377298	0.000556966	0.00544909	0.909397	0.025206	0.58554	0.665636	0.424896	0.491389	0.529763	1.14742	22	20.0067	0.554532	12.8819	14.644	9.34771	1079.83	484	2.23106
LK1B	1.67	2021	2021-03	0.330625	0.150587	0.119404	0.0162906	0.0234044	0.038631	0.0478906	0.333149	0.252497	0	0.776598	0.917112	0.491281	0.427126	1.91613	21	6.99613	5.30243	0	16.3086	19.2594	1226.05	441	2.78015
NS1B	0.21	2022	2022-02	0.377433	0	0.410344	0.0960419	0.110743	0.0660296	0.10341	0.323725	0.140418	0.24472	1	0.273157	0.491219	0.425612	0.240947	22	7.12196	3.0892	5.38384	22	6.00945	1348.74	484	2.78665
IU29	0.3	2022	2022-07	0.17313	0.011959	0.182791	0.626046	0.558916	0.159718	0.12377	0.91802	0.778542	0.59517	0.323989	0.838377	0.491183	0.475164	0.344206	23	21.1145	17.9065	13.6889	7.45175	19.2827	1578.81	529	2.98452
IU19	0.3	2022	2022-09	0.154369	0.028903	0.27917	0.496871	0.451108	0.177717	0.145262	0.828597	0.866858	0.878965	0.373883	0.499419	0.491119	0.538226	0.344201	23	19.0577	19.9377	20.2162	8.5993	11.4866	1389.42	529	2.62649
GF29	1.03	2022	2022-02	0.211768	0.47138	0.104984	0.184177	0.170692	0.0694536	0.0736156	0.680743	0.269587	0.777398	0.0895279	1	0.490965	0.502525	1.18171	23	15.6571	6.2005	17.8802	2.05914	23	1405.73	529	2.65733
IF1A	3.2	2022	2022-09	0.162376	0.317272	0.0885401	0.0308458	0.0504381	0.122374	0.063177	0.166475	1	0.630457	0.40901	0.848085	0.490896	0.449691	3.67126	21	3.49598	21	13.2396	8.58921	17.8098	1201.91	441	2.72543
GF19	1.07	2022	2022-09	0.177901	0.428221	0.120565	0.170312	0.238903	0.13712	0.130518	0.00508808	0.632817	0.83015	0.162078	0.845078	0.490731	0.515295	1.22752	23	0.117026	14.5548	19.0934	3.7278	19.4368	1390.14	529	2.62786
LF19	1.65	2022	2022-06	0.16778	0.298421	0.275889	0.0794759	0.0652014	0.0348844	0.0706643	0.773985	0.0468649	0.52584	0.698341	0.516239	0.490474	0.507166	1.89278	21	16.2537	0.984163	11.0426	14.6652	10.841	1159.26	441	2.62871
GD29	0.85	2022	2022-11	0.263636	0.39739	0.0809337	0.0499159	0.0570351	0.000721086	0.00235607	0.266069	0.0711059	0.576203	0.215834	1	0.49046	0.521575	0.975067	23	6.11958	1.63544	13.2527	4.96419	23	1093.28	529	2.0667
IF5B	0.86	2021	2021-05	0.294524	0.432951	0.162698	0.0128654	0.0275106	0.0118779	0.0374287	0.0657799	0.0178378	0.156826	0.844438	0.677751	0.490313	0.517695	0.986501	21	1.38138	0.374593	3.29335	17.7332	14.2328	1052.2	441	2.38594
MB19	2.52	2022	2022-03	0.248586	0.278968	0.168956	0.0180117	0.0322193	0.0556544	0.0486278	0	0.416832	0.593139	0.455051	0.797619	0.49024	0.52011	2.89062	21	0	8.75347	12.4559	9.55607	16.75	986.285	441	2.23647
LS13	0.66	2022	2022-11	0.16848	0	0.62063	0.0612707	0.0910102	0.289125	0.294168	0.107566	0.51795	0.391138	1	0.0698928	0.490057	0.422319	0.757031	23	2.47401	11.9129	8.99617	23	1.60753	1532.27	529	2.89655
FR39	0.4	2021	2021-10	0.282917	0.207	0.325985	0.0589947	0.0645918	0.286344	0.319846	0.466417	0.270501	0.690549	0.181644	0.935179	0.490041	0.415887	0.458805	23	10.7276	6.22153	15.8826	4.17782	21.5091	1539.6	529	2.9104
LR1B	0.77	2022	2022-10	0.190609	0.0019111	0.462211	0.164438	0.111484	0.292094	0.311279	0.896129	0.411386	0.208478	0.917059	0.36254	0.489754	0.504571	0.883133	23	20.611	9.46189	4.79499	21.0923	8.33843	1340.96	529	2.53489
RU19	0.9	2021	2021-09	0.467643	0	0.381964	0.00929867	0.0448601	0.379679	0.50528	0	0.193796	0.480253	1	0	0.489728	0.358073	1.03223	23	0	4.45731	11.0458	23	0	1439.82	529	2.72178
LR11	0.95	2022	2022-09	0.256991	0.00165363	0.40768	0.149408	0.110035	0.400414	0.235344	0.730981	1	0.149797	0.955652	0.39451	0.489694	0.455917	1.08956	23	16.8126	23	3.44532	21.98	9.07373	1499.33	529	2.83428
KS19	0.35	2021	2021-02	0.355299	0.0147933	0.394701	0.127596	0.101739	0.165844	0.150846	0.717283	0.391929	0.227088	0.539405	0.863792	0.489364	0.472301	0.401383	23	16.4975	9.01436	5.22304	12.4063	19.8672	1355.11	529	2.56164
LJ13	0.5	2022	2022-05	0.419133	0.1511	0.190331	0.00482247	0.0108265	0.068431	0.0824836	0.11512	0.26924	0.356223	0.685175	0.691032	0.489273	0.525104	0.573391	21	2.41752	5.65403	7.48069	14.3887	14.5117	1012.11	441	2.29504
FR39	0.4	2021	2021-06	0.244249	0.239812	0.314368	0.0574834	0.0645918	0.256181	0.319846	0.449781	0.153967	0.886275	0.0519255	0.969729	0.489159	0.415887	0.458699	23	10.345	3.54124	20.3843	1.19429	22.3038	1539.6	529	2.9104
IB31	3.97	2021	2021-08	0.193663	0.189817	0.077528	0.0495427	0.0491185	0.0180292	0.0325697	0.343582	0.192032	0.219974	0.665665	0.855589	0.489124	0.443638	4.55255	21	7.21522	4.03268	4.61946	13.979	17.9674	1143.05	441	2.59196
GF19	1.07	2021	2021-06	0.216018	0.323422	0.154474	0.254095	0.238903	0.11302	0.130518	0.65745	0.321998	0.477571	0.711692	0.364196	0.489054	0.515295	1.22699	23	15.1213	7.40596	10.9841	16.3689	8.3765	1390.14	529	2.62786
GV13	0.77	2021	2021-12	0.515142	0.0696879	0.304574	0.0455581	0.0981922	0.0479799	0.0874161	0.0979896	0.128167	0.134027	0.640563	0.815642	0.488881	0.437611	0.882932	23	2.25376	2.94784	3.08262	14.7329	18.7598	1227.64	529	2.32069
GR11	1.03	2022	2022-05	0.550754	0.000175049	0.244197	0.0442231	0.0496398	0.277447	0.391391	0.33576	0.389332	0	0.999189	0.442318	0.488854	0.467597	1.18106	23	7.72248	8.95464	0	22.9813	10.1733	1439.09	529	2.72039
FV29	0.33	2022	2022-03	0.247173	0.0365866	0.534457	0.139106	0.0944113	0.0749901	0.217947	0.873454	0.186821	0.648641	0.556889	0.441797	0.488801	0.454141	0.378391	23	20.0894	4.29688	14.9187	12.8085	10.1613	1570.81	529	2.9694
IF5B	0.86	2021	2021-12	0.221859	0.474241	0.17425	0.0167538	0.0275106	0.0601237	0.0374287	0.13415	0.797609	0.682204	0.619037	0.488306	0.488645	0.517695	0.98607	21	2.81715	16.7498	14.3263	12.9998	10.2544	1052.2	441	2.38594
NF1A	0.72	2021	2021-01	0.293961	0.345248	0.242718	0.121178	0.0606467	0.0562739	0.0544711	1	0.498705	0.362767	0.612852	0.648407	0.488634	0.519567	0.825545	23	23	11.4702	8.34365	14.0956	14.9134	1285.63	529	2.4303
FW19	0.53	2021	2021-10	0.304999	0.0855187	0.335567	0.0323595	0.0826931	0.194325	0.138831	0	0.497082	0.764425	0.451495	0.476651	0.488586	0.48179	0.607685	23	0	11.4329	17.5818	10.3844	10.963	1240.08	529	2.34419
GV13	0.77	2021	2021-03	0.220459	0.112598	0.498117	0.0477773	0.0981922	0.0520739	0.0874161	0.10459	0.14557	1	0.419239	0.320763	0.488469	0.437611	0.882836	23	2.40557	3.34811	23	9.64249	7.37754	1227.64	529	2.32069
BR21	1.15	2022	2022-01	0.389394	0.000149665	0.405312	0.0828035	0.131895	0.163422	0.206899	0.38086	0.235198	0.0566899	0.997066	0.390581	0.488369	0.479396	1.31849	23	8.75979	5.40954	1.30387	22.9325	8.98337	1454.44	529	2.74942
EB19	6.81	2022	2022-06	0.151005	0.269956	0.0863329	0.0431192	0.0284104	0.0132784	0.0134939	0.854065	0.344973	0.0985465	0.935619	0.615828	0.488341	0.555324	7.80768	21	17.9354	7.24443	2.06948	19.648	12.9324	1040.63	441	2.35969
DE29	1.25	2022	2022-08	0.197937	0.696398	0.177037	0.00929125	0.00888239	0.0687398	0.0523303	0.294061	0.27574	0.883263	0.472236	0.498937	0.488307	0.500179	1.43311	21	6.17528	5.79054	18.5485	9.91695	10.4777	938.608	441	2.12836
BR21	1.15	2022	2022-04	0.363097	0	0.423881	0.106787	0.131895	0.170283	0.206899	0.491174	0.274277	0.239708	1	0.209317	0.488203	0.479396	1.31843	23	11.297	6.30836	5.51328	23	4.81429	1454.44	529	2.74942
KS19	0.35	2022	2022-01	0.373923	0.0103812	0.413241	0.0759501	0.101739	0.1007	0.150846	0.426954	0.0755438	0.131052	0.676777	0.762914	0.48813	0.472301	0.401254	23	9.81994	1.73751	3.01419	15.5659	17.547	1355.11	529	2.56164
GZ19	0.54	2021	2021-11	0.287308	0.217333	0.299425	0.12261	0.10713	0.0909612	0.0936129	0.746709	0.33014	0	0.623894	1	0.488023	0.505005	0.61906	23	17.1743	7.59322	0	14.3496	23	1288.44	529	2.43561
GE1A	1.33	2021	2021-01	0.151181	0.497353	0.114077	0.0460071	0.0397917	0.0038818	0.0174681	0.407609	0.046162	0.943149	0.0908497	0.957088	0.487857	0.541633	1.52465	22	8.9674	1.01556	20.7493	1.99869	21.0559	995.135	484	2.05606
IU29	0.3	2022	2022-05	0.193237	0.00756914	0.205068	0.575243	0.558916	0.169926	0.12377	0.843524	0.886711	0.404572	0.572137	0.681104	0.487812	0.475164	0.343903	23	19.401	20.3944	9.30516	13.1592	15.6654	1578.81	529	2.98452
CZ15	0.12	2021	2021-01	0.454698	0.0339745	0.121331	0.254342	0.277073	0.375293	0.279782	0.568073	0.975164	0.0157966	0.814471	1	0.487744	0.457082	0.137559	20	11.3615	19.5033	0.315931	16.2894	20	1320.33	400	3.30082
EX25	0.38	2021	2021-07	0.335465	0.0161002	0.364492	0.0998689	0.11617	0.20528	0.15971	0.287889	0.676603	0	0.695172	0.975665	0.48754	0.377875	0.43558	22	6.33356	14.8853	0	15.2938	21.4646	1399.31	484	2.89115
GE15	1	2022	2022-08	0.146534	0.483517	0.137114	0.0479447	0.0377298	0.00309995	0.00544909	0.603668	0.140291	0.778356	0.554369	0.397089	0.487484	0.529763	1.14625	22	13.2807	3.0864	17.1238	12.1961	8.73597	1079.83	484	2.23106
GE1A	1.33	2022	2022-11	0.138574	0.484878	0.125665	0.034039	0.0397917	0.00394654	0.0174681	0.260113	0.0469319	1	0.162023	0.794417	0.487374	0.541633	1.52446	22	5.72248	1.0325	22	3.56451	17.4772	995.135	484	2.05606
EB19	6.81	2021	2021-06	0.138472	0.317721	0.0705689	0.048949	0.0284104	0.0103765	0.0134939	0.996233	0.269581	0.246371	0.595602	0.978351	0.487287	0.555324	7.80553	21	20.9209	5.6612	5.1738	12.5076	20.5454	1040.63	441	2.35969
BJ1B	1.09	2021	2021-11	0.269535	0.28697	0.170277	0.32797	0.284251	0.0816603	0.100056	0.738549	0.473079	0.5513	0.807389	0.541221	0.487237	0.48682	1.24933	19	14.0324	8.98849	10.4747	15.3404	10.2832	1142.01	361	3.16345
EX25	0.38	2022	2022-03	0.19983	0	0.522871	0.0683589	0.11617	0.294813	0.15971	0.116854	1	0.620855	1	0	0.487084	0.377875	0.435528	22	2.57079	22	13.6588	22	0	1399.31	484	2.89115
BV39	0.31	2022	2022-09	0.288487	0	0.486455	0.138563	0.262158	0.168438	0.159376	0.0401657	0.395409	0.2808	1	0.186168	0.487059	0.458346	0.355296	23	0.923811	9.09442	6.45841	23	4.28187	1196.68	529	2.26216
HC3B	2.1	2022	2022-11	0.21115	0.348815	0.107606	0.0535571	0.0561504	0.0139905	0.0136239	0.66696	0.236223	0.780885	0.110865	1	0.486979	0.533606	2.4068	23	15.3401	5.43312	17.9604	2.5499	23	1284.73	529	2.4286
LX15	0.25	2022	2022-06	0.387779	0	0.513973	0	0.02731	0.169197	0.0865126	0	1	0.140729	1	0.447182	0.486849	0.505016	0.286514	22	0	22	3.09603	22	9.83801	1150.3	484	2.37665
BT25	0.69	2022	2022-02	0.375781	0.000301191	0.222588	0.154127	0.228634	0.175744	0.117218	0.254297	0.841752	0.871242	0.462126	0.465798	0.48682	0.342936	0.790772	22	5.59453	18.5185	19.1673	10.1668	10.2475	1597.56	484	3.30074
IB31	3.97	2021	2021-06	0.230711	0.165656	0.0817735	0.0486622	0.0491185	0.0576528	0.0325697	0.331414	0.682168	0.013129	0.867861	0.801544	0.486501	0.443638	4.54942	21	6.9597	14.3255	0.275709	18.2251	16.8324	1143.05	441	2.59196
NF15	0.7	2021	2021-11	0.229176	0.420306	0.26767	0.0941198	0.0769177	0.082332	0.0600122	0.796257	0.732582	0.893256	0.509616	0.3159	0.486458	0.511415	0.802156	23	18.3139	16.8494	20.5449	11.7212	7.26569	1334.73	529	2.52312
IF15	2.5	2022	2022-09	0.149039	0.388151	0.0974084	0.0169905	0.0315791	0.0663174	0.0662677	0.147291	0.47011	0.56275	0.486079	0.786272	0.486392	0.391852	2.86479	21	3.09311	9.87231	11.8177	10.2077	16.5117	1204.99	441	2.73239
HS2B	0.7	2022	2022-10	0.360262	0.0173638	0.430325	0.0392073	0.0463547	0.247788	0.256995	0.267063	0.452411	0.364893	0.799769	0.351559	0.48637	0.484502	0.802138	23	6.14246	10.4054	8.39253	18.3947	8.08585	1296.78	529	2.45139
EX1A	0.53	2022	2022-02	0.509249	0	0.39351	0.126316	0.0884604	0	0.180266	0.994996	0	0	1	0.518142	0.486338	0.413818	0.607328	23	22.8849	0	0	23	11.9173	1664.09	529	3.14574
LR11	0.95	2021	2021-04	0.243889	0	0.478901	0.0336875	0.110035	0.22243	0.235344	0	0.555499	0.252581	1	0.223508	0.486332	0.455917	1.0886	23	0	12.7765	5.80937	23	5.14067	1499.33	529	2.83428
JJ15	0.49	2022	2022-09	0.21461	0.417499	0.275605	0.0806555	0.0702909	0.0517095	0.024715	0.498608	0.688181	0.391068	0.654427	0.618141	0.486141	0.519894	0.561463	22	10.9694	15.14	8.60349	14.3974	13.5991	1123.01	484	2.32026
GD29	0.85	2021	2021-01	0.276021	0.323154	0.137548	0.0818748	0.0570351	0.00161959	0.00235607	0.609456	0.159707	0.485196	0.762606	0.300011	0.485964	0.521575	0.973921	23	14.0175	3.67326	11.1595	17.5399	6.90026	1093.28	529	2.0667
GF29	1.03	2021	2021-04	0.183549	0.469687	0.136985	0.197733	0.170692	0.0698456	0.0736156	0.785187	0.281043	0.995604	0.0948065	0.847012	0.485916	0.502525	1.18015	23	18.0593	6.46399	22.8989	2.18055	19.4813	1405.73	529	2.65733
NF15	0.7	2021	2021-12	0.21528	0.383447	0.295286	0.106389	0.0769177	0.0718791	0.0600122	1	0.591355	1	0.613276	0.119109	0.485675	0.511415	0.801992	23	23	13.6012	23	14.1053	2.7395	1334.73	529	2.52312
TT19	0.63	2022	2022-10	0.121963	0	0.44598	0.138586	0.315997	0.345674	0.307573	0	0.835081	0.537839	1	0	0.485659	0.47371	0.72179	23	0	19.2069	12.3703	23	0	1418.39	529	2.68126
FR39	0.4	2021	2021-07	0.221781	0.252947	0.30419	0.0771397	0.0645918	0.306196	0.319846	0.666156	0.3472	1	0	1	0.485638	0.415887	0.458277	23	15.3216	7.9856	23	0	23	1539.6	529	2.9104
LF19	1.65	2021	2021-09	0.265544	0.142273	0.262008	0.0777924	0.0652014	0.0652321	0.0706643	0.752849	0.27295	0	1	0.641285	0.485625	0.507166	1.89038	21	15.8098	5.73195	0	21	13.467	1159.26	441	2.62871
GF29	1.03	2022	2022-04	0.20308	0.449116	0.12187	0.204728	0.170692	0.0884033	0.0736156	0.839078	0.823383	0.84458	0.158966	0.91927	0.485446	0.502525	1.18	23	19.2988	18.9378	19.4253	3.65622	21.1432	1405.73	529	2.65733
HS21	1.58	2021	2021-03	0.445163	0.000543842	0.345135	0.00867805	0.0350051	0.336878	0.225783	0.0630875	1	0.278843	0.992123	0.255507	0.485321	0.502306	1.81004	23	1.45101	23	6.41338	22.8188	5.87666	1292.2	529	2.44273
IJ1B	0.81	2021	2021-10	0.249498	0.178109	0.128069	0.107462	0.215286	0.0355275	0.0726381	0.171903	0.092369	0.233488	0.701283	0.816462	0.485161	0.477843	0.927894	21	3.60996	1.93975	4.90325	14.7269	17.1457	1100.29	441	2.49498
IF1A	3.2	2021	2021-07	0.203184	0.258082	0.1039	0.0399363	0.0504381	0.0199385	0.063177	0.285013	0	0.243963	0.748388	0.739391	0.484952	0.449691	3.66555	21	5.98526	0	5.12322	15.7162	15.5272	1201.91	441	2.72543
JJ15	0.49	2021	2021-10	0.179663	0.441159	0.288409	0.0490191	0.0702909	0.00948583	0.024715	0.26887	0.126243	0.587263	0.579468	0.536946	0.484923	0.519894	0.561284	22	5.91513	2.77735	12.9198	12.7483	11.8128	1123.01	484	2.32026
LS11	0.83	2022	2022-03	0.217751	0	0.511178	0.0905311	0.099655	0.160823	0.289866	0.467075	0.0451751	0.203724	1	0.345115	0.484819	0.457921	0.95072	22	10.2756	0.993853	4.48192	22	7.59254	1328.67	484	2.7452
BR23	0.61	2022	2022-05	0.331393	0.00435385	0.443482	0.116102	0.136941	0.226327	0.177379	0.113392	0.928527	0.14664	0.895871	0.496584	0.48471	0.542907	0.698702	23	2.60802	21.3561	3.37272	20.605	11.4214	1127.41	529	2.1312
BR11	1.8	2021	2021-04	0.154962	0	0.339395	0.459622	0.663087	0.124094	0.0721959	0	0.699941	0.530045	1	0	0.484687	0.36143	2.06173	23	0	16.0987	12.191	23	0	1534.13	529	2.90006
BR21	1.15	2022	2022-05	0.321546	0.00244484	0.442217	0.130082	0.131895	0.196463	0.206899	0.598322	0.423376	0.528887	0.952072	0.0303197	0.484619	0.479396	1.31719	23	13.7614	9.73765	12.1644	21.8977	0.697352	1454.44	529	2.74942
LR11	0.95	2022	2022-08	0.257424	0	0.415467	0.180934	0.110035	0.308575	0.235344	0.930124	0.77064	0.146397	1	0.375814	0.484538	0.455917	1.08809	23	21.3928	17.7247	3.36714	23	8.64373	1499.33	529	2.83428
NF15	0.7	2022	2022-06	0.274274	0.400536	0.236149	0.0992627	0.0769177	0.0589192	0.0600122	0.881657	0.416255	0.54684	0.565217	0.540517	0.484324	0.511415	0.801708	23	20.2781	9.57387	12.5773	13	12.4319	1334.73	529	2.52312
BR23	0.61	2022	2022-06	0.32299	0.00585021	0.454193	0.10886	0.136941	0.208569	0.177379	0.0644142	0.750246	0.235841	0.860084	0.435136	0.484237	0.542907	0.698615	23	1.48153	17.2557	5.42434	19.7819	10.0081	1127.41	529	2.1312
IT2B	0.8	2021	2021-02	0.181086	0	0.574039	0.176125	0.462315	0.204973	0.145523	0.058636	0.98047	0.451161	1	0.0986177	0.484154	0.436286	0.916197	23	1.34863	22.5508	10.3767	23	2.26821	1529.1	529	2.89054
DD29	1.45	2022	2022-03	0.233102	0.325794	0.332573	0.00425495	0.0269961	0.153168	0.056337	0	1	0.757397	1	0	0.484122	0.56314	1.66059	21	0	21	15.9053	21	0	914.823	441	2.07443
BW2A	1.16	2021	2021-03	0.142124	0	0.374349	0.191364	0.67563	0.622121	0.156156	0.16144	1	0.396032	1	0.2899	0.483981	0.387346	1.32843	21	3.39024	21	8.31667	21	6.0879	1424.73	441	3.23068
MB19	2.52	2021	2021-09	0.233246	0.305184	0.155728	0.0187925	0.0322193	0.040388	0.0486278	0.0177334	0.138087	0.816451	0.284208	0.896548	0.483964	0.52011	2.88588	21	0.372401	2.89983	17.1455	5.96838	18.8275	986.285	441	2.23647
FW2B	0.65	2021	2021-11	0.149443	0.251793	0.130099	0.0065577	0.100316	0.013961	0.136854	0	0	0.758633	0.15851	1	0.483731	0.410567	0.744327	23	0	0	17.4486	3.64573	23	1245.8	529	2.35502
LX15	0.25	2022	2022-09	0.358178	0.0234498	0.479714	0.0922871	0.02731	0.0709805	0.0865126	1	0.39435	0.242294	0.865642	0.520944	0.483555	0.505016	0.286267	22	22	8.67571	5.33047	19.0441	11.4608	1150.3	484	2.37665
GF19	1.07	2021	2021-08	0.228507	0.31527	0.145173	0.290468	0.238903	0.149586	0.130518	0.940656	0.793593	0.362052	0.754446	0.496097	0.483134	0.515295	1.22509	23	21.6351	18.2526	8.3272	17.3522	11.4102	1390.14	529	2.62786
IF1A	3.2	2022	2022-07	0.171255	0.296241	0.103814	0.0411885	0.0504381	0.0741776	0.063177	0.301341	0.529492	0.546368	0.529595	0.740001	0.483044	0.449691	3.66372	21	6.32815	11.1193	11.4737	11.1215	15.54	1201.91	441	2.72543
FW19	0.53	2021	2021-07	0.308214	0.0397558	0.451171	0.0327725	0.0826931	0.278628	0.138831	0.00322719	0.790695	0.749969	0.745011	0.145413	0.483015	0.48179	0.606799	23	0.0742253	18.186	17.2493	17.1353	3.34449	1240.08	529	2.34419
LX13	0.4	2022	2022-05	0.267794	0.104652	0.351355	0.0160205	0.0130724	0.0417489	0.106496	0.289969	0	0.782443	0.170428	0.938772	0.482865	0.44718	0.457944	23	6.6693	0	17.9962	3.91984	21.5917	1192.21	529	2.2537
IC39	2.6	2022	2022-05	0.187406	0.306962	0.108073	0.11083	0.0804234	0.0564507	0.0439479	0.817933	0.627159	0.444836	0.789133	0.493162	0.482766	0.526481	2.97656	21	17.1766	13.1703	9.34157	16.5718	10.3564	1096.2	441	2.48571
HZ15	0.4	2022	2022-10	0.350393	0.0513421	0.307758	0.0336396	0.31448	0.129804	0.149092	0	0.322082	0	0.761719	0.825735	0.482532	0.413803	0.457904	23	0	7.40789	0	17.5195	18.9919	1530.33	529	2.89287
IT21	1.4	2021	2021-04	0.305565	0.000736849	0.542945	0.0985764	0.350215	0.161648	0.16763	0.0656012	0.416532	0.390412	0.987367	0.123	0.482277	0.394419	1.60256	23	1.50883	9.58024	8.97949	22.7094	2.82899	1565.72	529	2.95978
BV39	0.31	2022	2022-01	0.284126	0.000448226	0.484301	0.184906	0.262158	0.162762	0.159376	0.115253	0.36904	0.302252	0.992546	0.190513	0.482232	0.458346	0.354848	23	2.65082	8.48791	6.9518	22.8286	4.3818	1196.68	529	2.26216
KT15	0.43	2022	2022-11	0.17736	0	0.667553	0.127578	0.128678	0.115515	0.20209	0.585091	0	0.383035	1	0.126388	0.482221	0.517606	0.492206	23	13.4571	0	8.8098	23	2.90692	1314	529	2.48393
GF29	1.03	2021	2021-08	0.202586	0.442904	0.12555	0.213173	0.170692	0.0659957	0.0736156	0.904138	0.168533	0.848399	0.178342	0.90168	0.482153	0.502525	1.17899	23	20.7952	3.87627	19.5132	4.10186	20.7386	1405.73	529	2.65733
MB19	2.52	2021	2021-04	0.227787	0.308068	0.164221	0.0352798	0.0322193	0.0575361	0.0486278	0.392182	0.451188	0.895918	0.265413	0.833031	0.481954	0.52011	2.88436	21	8.23581	9.47496	18.8143	5.57367	17.4936	986.285	441	2.23647
NF1A	0.72	2021	2021-11	0.275797	0.335437	0.271016	0.050141	0.0606467	0.0953796	0.0544711	0.300054	0.870406	0.459498	0.637277	0.531286	0.481941	0.519567	0.824099	23	6.90125	20.0193	10.5685	14.6574	12.2196	1285.63	529	2.4303
IZ29	0.4	2022	2022-02	0.136467	0.0410193	0.197264	0.883509	0.613022	0.126274	0.104398	1	0.623821	0.89971	0.278576	0.714341	0.481682	0.4865	0.457802	23	23	14.3479	20.6933	6.40725	16.4298	1245.17	529	2.35381
BR15	0.84	2021	2021-08	0.126475	0	0.105069	0.713396	0.476389	0.177407	0.0802557	1	1	0.968912	#NUM!	0.848362	0.481464	0.58507	0.961329	12	12	12	11.6269	#NUM!	10.1803	358.048	144	2.48644
HZ15	0.4	2021	2021-09	0.202492	0	0.531925	0.153867	0.31448	0.14682	0.149092	0.244054	0.380386	0.512563	1	0	0.481391	0.413803	0.457767	23	5.61324	8.74887	11.7889	23	0	1530.33	529	2.89287
JZ19	0.43	2022	2022-05	0.501817	0	0.355503	0.0553302	0.138434	0.0845646	0.163356	0.100332	0.051217	0.156913	1	0.340573	0.481345	0.451097	0.492094	23	2.30764	1.17799	3.60899	23	7.83317	1349.17	529	2.55041
NF15	0.7	2022	2022-08	0.232885	0.328435	0.312	0.063436	0.0769177	0.0470454	0.0600122	0.286736	0.255829	0.864769	0.767988	0	0.481333	0.511415	0.80108	23	6.59492	5.88407	19.8897	17.6637	0	1334.73	529	2.52312
BR23	0.61	2022	2022-04	0.328656	0.00703152	0.440833	0.140497	0.136941	0.186093	0.177379	0.278371	0.524604	0.175692	0.831831	0.511779	0.481134	0.542907	0.698048	23	6.40252	12.0659	4.04092	19.1321	11.7709	1127.41	529	2.1312
LJ13	0.5	2021	2021-10	0.397706	0.172144	0.156244	0.0146193	0.0108265	0.117467	0.0824836	0.348985	0.586454	0.432398	0.513649	0.892667	0.480936	0.525104	0.57214	21	7.32869	12.3155	9.08035	10.7866	18.746	1012.11	441	2.29504
MB19	2.52	2022	2022-08	0.236155	0.297938	0.162172	0.0306691	0.0322193	0.0464133	0.0486278	0.287465	0.248102	0.774105	0.331427	0.848355	0.48065	0.52011	2.88337	21	6.03677	5.21014	16.2562	6.95996	17.8155	986.285	441	2.23647
GV13	0.77	2022	2022-01	0.388276	0.0816103	0.415297	0.083854	0.0981922	0.0888778	0.0874161	0.211891	0.302019	0.50684	0.579069	0.53253	0.480452	0.437611	0.880984	23	4.8735	6.94644	11.6573	13.3186	12.2482	1227.64	529	2.32069
BU23	0.78	2022	2022-08	0.210662	0.0248881	0.338038	0.333357	0.428322	0.2173	0.191235	0.331703	0.672565	0.505308	0.833833	0.211485	0.480339	0.438033	0.892399	23	7.62917	15.469	11.6221	19.1782	4.86416	1488.08	529	2.813
LJ13	0.5	2021	2021-11	0.385853	0.168951	0.168815	0.00432774	0.0108265	0.0806671	0.0824836	0.10331	0.348394	0.474537	0.539669	0.818308	0.480307	0.525104	0.572046	21	2.16951	7.31628	9.96529	11.333	17.1845	1012.11	441	2.29504
GV15	0.58	2021	2021-03	0.423131	0.054743	0.41668	0.00963935	0.0925023	0.111314	0.0731192	0	0.347704	0.271911	0.809231	0.465107	0.480164	0.473692	0.663549	23	0	7.99718	6.25396	18.6123	10.6975	1238.57	529	2.34134
BR23	0.61	2022	2022-11	0.291534	0	0.530041	0.0993355	0.136941	0.136101	0.177379	0	0.0227177	0.569763	1	0	0.480026	0.542907	0.697845	23	0	0.522508	13.1046	23	0	1127.41	529	2.1312
LX15	0.25	2022	2022-07	0.341859	0	0.595116	0.0079082	0.02731	0.0596515	0.0865126	0.0856912	0.32449	0.298288	1	0.272482	0.479898	0.505016	0.285992	22	1.88521	7.13879	6.56234	22	5.99461	1150.3	484	2.37665
BV39	0.31	2021	2021-08	0.30523	0.0127874	0.302082	0.364409	0.262158	0.105928	0.159376	0.406087	0.104987	0.19843	0.787343	0.558035	0.479726	0.458346	0.354615	23	9.33999	2.41469	4.56389	18.1089	12.8348	1196.68	529	2.26216
NF15	0.7	2022	2022-04	0.251381	0.382536	0.270288	0.0767156	0.0769177	0.0478506	0.0600122	0.507252	0.266708	0.722696	0.615837	0.297243	0.479669	0.511415	0.80073	23	11.6668	6.13429	16.622	14.1642	6.83658	1334.73	529	2.52312
DS19	0.4	2022	2022-10	0.280031	0	0.498521	0.101779	0.362109	0.160975	0.130358	0	0.654468	0.503924	1	0.0515821	0.479126	0.437488	0.457495	23	0	15.0528	11.5902	23	1.18639	1491.27	529	2.81904
FR1B	0.7	2021	2021-01	0.359046	0.000439133	0.436704	0.0360023	0.0922667	0.0858895	0.237881	0.000944169	0.0926741	0.323935	0.996406	0.204845	0.479109	0.424261	0.800613	23	0.0217159	2.1315	7.4505	22.9173	4.71143	1368.03	529	2.58606
IZ29	0.4	2022	2022-08	0.164255	0.0452778	0.157961	0.683872	0.613022	0.1084	0.104398	0.452184	0.46277	0.669655	0.203678	1	0.478876	0.4865	0.457465	23	10.4002	10.6437	15.4021	4.6846	23	1245.17	529	2.35381
DS19	0.4	2022	2022-05	0.262613	0.0145274	0.330538	0.380635	0.362109	0.117892	0.130358	0.627218	0.306077	0.607624	0.48835	0.584808	0.47831	0.437488	0.457397	23	14.426	7.03977	13.9754	11.2321	13.4506	1491.27	529	2.81904
GR11	1.03	2022	2022-09	0.384942	0.0423738	0.335285	0.0381021	0.0496398	0.254309	0.391391	0.270167	0.342757	0.722174	0.803598	0.0708952	0.478303	0.467597	1.1778	23	6.21385	7.88341	16.61	18.4827	1.63059	1439.09	529	2.72039
GF19	1.07	2022	2022-08	0.202739	0.391009	0.124294	0.22169	0.238903	0.124947	0.130518	0.405132	0.475823	0.600405	0.357234	0.792199	0.478278	0.515295	1.22353	23	9.31804	10.9439	13.8093	8.21639	18.2206	1390.14	529	2.62786
BZ15	0.3	2022	2022-08	0.0966503	0.0025292	0.581072	0.194429	0.49317	0.0797513	0.173539	0	0.0572349	0.855214	0.882158	0	0.478132	0.40852	0.343032	22	0	1.25917	18.8147	19.4075	0	1397.01	484	2.88638
GW1A	0.5	2022	2022-05	0.257847	0.148764	0.431429	0.173526	0.103302	0.152543	0.112428	0.973032	0.749544	0.627301	0.496609	0.650739	0.477903	0.595493	0.571685	23	22.3797	17.2395	14.4279	11.422	14.967	1112.54	529	2.10311
HS21	1.58	2022	2022-02	0.460213	0	0.327168	0.00390689	0.0350051	0.249833	0.225783	0	0.590201	0.171243	1	0.347946	0.477845	0.502306	1.8065	23	0	13.5746	3.93859	23	8.00275	1292.2	529	2.44273
CU19	0.4	2021	2021-09	0.327519	0.0535165	0.235242	0.300741	0.269089	0.236158	0.252201	0.492497	0.31274	0.423864	0.486427	0.853661	0.477679	0.479634	0.457321	22	10.8349	6.88027	9.32501	10.7014	18.7805	1192.61	484	2.46407
[truncated: 1,518 more rows]

## Sheet: Sheet2
DRG_code	original_DRG_weight	AVE-drug	AVE-surgery	check_ratio	AVE-check	AVE-tcm	AVE-herb	A-tcm_tech_ratio_norm	A_herb_ratio_norm	A_western_drug_ratio_norm	A_surgery_ratio_norm	A_check_ratio_norm	AVE-ESI	A_DRG_weight_adj	sample_size	weighted_tcm_tech_ratio_norm	weighted_herb_ratio_norm	weighted_western_drug_ratio_norm	weighted_surgery_ratio_norm	weighted_check_ratio_norm	total_sample_size	weighted_avg_norm
[truncated: 3,395 more rows]

[truncated: 10 more sheets: 主表1, 165表, 表1, 权重值, 手术, 非手术盈利, 亏损手术, 亏损非手术, Sheet3, Sheet4]
